# Supplementary material for: Cattle infection response network and its functional modules
Source: Springer Nature journal article supplement (doi:10.1186/s12865-017-0238-4), 2018-01-05

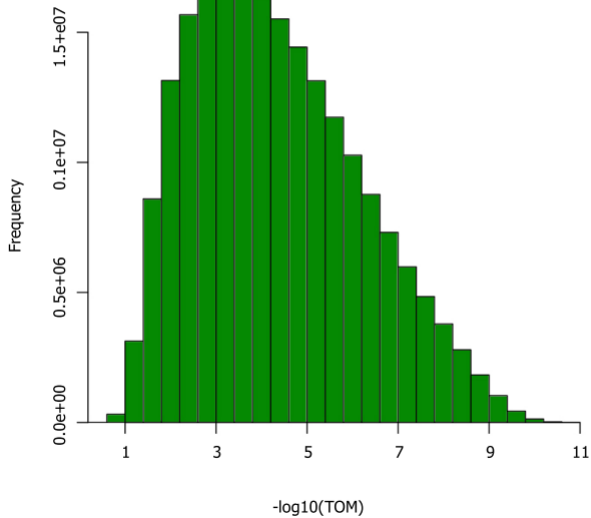

Supplement: MOESM8 [file 15347066]
