# Supplementary material for: Cattle infection response network and its functional modules
Source: BMC Immunol. 2018 Jan 5;19:2. doi: 10.1186/s12865-017-0238-4 (PMC5755453; doi:10.1186/s12865-017-0238-4)
Supplement: Supplementary file 2 — Over-represented GO/Pathway terms in the co-expressed modules. (XLSX 206 kb) [file 12865_2017_238_MOESM2_ESM.xlsx]

## Sheet: blue
Biological Process (BP)					Molecular Function (MF)					REACTOME pathway
BP GOID	BP GOTerm	BP GO Groups	Associated Genes Found	Term PValue Corrected with Benjamini-Hochberg	MF GOID	MF GOTerm	MF GO Groups	Associated Genes Found	Term PValue Corrected with Benjamini-Hochberg	REACTOME ID	REACTOME Pathway	REACTOME Groups	Associated Genes Found	Term PValue Corrected with Benjamini-Hochberg
GO:0019752	fatty acid metabolic process	[Group1, Group4]	[ABCD1, ABCD3, ACAA1, ACAA2, ACACA, ACAD10, ACAD11, ACAD9, ACADL, ACADM, ACADS, ACADSB, ACADVL, ACOX1, ACOX2, ACOX3, ACSF2, ACSF3, ACSL3, ACSM1, ACSM3, AGMO, AGPAT6, ALDH5A1, ALKBH7, ALOX12, ALOX15B, ANGPTL3, APOA1, APOA5, APOC2, APOC3, BDH2, C3, CBR4, CPT1B, CPT2, CROT, CRYL1, CYP2B6, CYP2C19, CYP2C87, CYP2E1, CYP4V2, DECR1, DECR2, ECHDC2, ECHS1, ECI2, ELOVL5, ERLIN2, ETFA, ETFB, ETFDH, FAAH, FA…	4.00391e-23	GO:0005506	iron ion binding	[Group0]	[ACP5, AGMO, ALKBH2, ALKBH8, ALOX12, ALOX15B, AOX1, BBOX1, C10H14orf169, CYGB, CYP1A1, CYP1A2, CYP20A1, CYP26A1, CYP27A1, CYP2B6, CYP2C19, CYP2C87, CYP2E1, CYP2U1, CYP39A1, CYP4A11, CYP4A22, CYP4B1, CYP4F2, CYP4V2, CYP51A1, CYP7A1, EGLN3, FTH1, FTO, HAAO, HEPH, ISCA1, LOC505468, LOC509506, LOC511498, LOC521656, LOC530929, LOC534967, LOC540627, LTF, MIOX, NFU1, NOS2, NOS3, P3H2, P4HA3, P4HTM, PAH,…	2.34197e-06	REACTOME:6985584	Metabolism	[Group0]	[AASDHPPT, ABCD1, ABCD4, ABCG8, ABHD10, ABHD14A, ABHD14B, ACAA1, ACACA, ACAD10, ACAD11, ACADL, ACADM, ACADS, ACADSB, ACADVL, ACAT1, ACLY, ACOT8, ACOX1, ACOX2, ACOX3, ACP5, ACSF2, ACSF3, ACSL3, ACSL6, ACSM1, ACSM2B, ACSS2, ADAL, ADCY6, ADCY7, ADH4, ADH5, ADHFE1, ADI1, ADK, AGMAT, AGMO, AGPAT2, AGPAT3, AGPAT4, AGPAT6, AGRN, AHCY, AK1, AKR1A1, ALAD, ALAS1, ALB, ALDH1A1, ALDH2, ALDH3A2, ALDH4A1, ALDH…	5.48513e-36
GO:0046395	carboxylic acid catabolic process	[Group1, Group5]	[ABAT, ABCD1, ABCD3, ABHD10, ACAA1, ACAD10, ACAD11, ACAD9, ACADL, ACADM, ACADS, ACADSB, ACADVL, ACOT8, ACOX1, ACOX2, ACOX3, ACSF3, AKR1A1, ALDH1L1, ALDH1L2, ALDH4A1, ALDH5A1, AMDHD1, AMT, ATAT1, BCKDHB, BDH2, CPT1B, CROT, CYP26A1, DECR1, DTD2, ECHS1, ECI2, ENOSF1, ETFA, ETFB, ETFDH, FAAH, FAH, GCAT, GCDH, GCSH, GLDC, GLS, GLS2, GLUD1, GOT2, GSTZ1, HAAO, HACL1, HADHA, HADHB, HAL, HAO1, HARS2, HGD,…	1.2112e-17						REACTOME:6985626	Metabolism of lipids and lipoproteins	[Group8]	[ABCD1, ABCG8, ACAA1, ACACA, ACAD10, ACAD11, ACADL, ACADM, ACADS, ACADVL, ACAT1, ACLY, ACOT8, ACOX1, ACOX2, ACOX3, ACSF2, ACSF3, ACSL3, ACSL6, AGMO, AGPAT2, AGPAT3, AGPAT4, AGPAT6, ALB, ALDH3A2, ALOX12, ALOX15B, APOA1, APOA2, APOA5, APOC2, APOC3, ARSA, ARSK, ARV1, BDH2, CDS2, CEPT1, CHKB, CHPT1, COQ2, CPT1B, CPT2, CRLS1, CROT, CTSA, CYP1A1, CYP1A2, CYP27A1, CYP2C87, CYP2U1, CYP39A1, CYP4A11, CYP4…	4.02275e-17
GO:0032787	lipid oxidation	[Group1, Group4]	[ABCD1, ABCD3, ACAA1, ACAD10, ACAD11, ACAD9, ACADL, ACADM, ACADS, ACADSB, ACADVL, ACOX1, ACOX2, ACOX3, ALOX12, BDH2, CPT1B, CROT, CYP4V2, DECR1, ECHS1, ETFA, ETFB, ETFDH, GCDH, HACL1, HADHA, HADHB, HAO1, HAO2, HSD17B4, IRS1, IVD, LONP2, PDK4, PEX5, PEX7, PHYH, PLA2G7, PLIN5, PPARA, PRKAA1, SLC27A2]	1.35056e-14						REACTOME:6985589	Biological oxidations	[Group2]	[ABHD10, ABHD14A, ABHD14B, ACSM1, ACSM2B, ACSS2, ADH4, ADH5, AHCY, AKR1A1, ALDH1A1, ALDH2, AOC1, AOC3, BPNT1, BREH1, CES1, CES2, CYP1A1, CYP1A2, CYP26A1, CYP27A1, CYP2B6, CYP2C87, CYP2E1, CYP2U1, CYP39A1, CYP4A11, CYP4A22, CYP4B1, CYP4F2, CYP51A1, CYP7A1, EPHX1, ESD, FDX1, FMO1, FMO2, FMO3, GCLC, GCLM, GGT1, GLYAT, GSS, GSTA4, GSTK1, GSTM1, GSTM3, GSTP1, GSTT1, GSTT2, GSTZ1, LOC505468, LOC509506,…	5.27815e-11
GO:0006631	carboxylic acid metabolic process	[Group0]	[AARSD1, AASDHPPT, ABAT, ABCD1, ABCD3, ABHD10, ACAA1, ACAA2, ACACA, ACAD10, ACAD11, ACAD9, ACADL, ACADM, ACADS, ACADSB, ACADVL, ACLY, ACMSD, ACO1, ACOT8, ACOX1, ACOX2, ACOX3, ACSF2, ACSF3, ACSL3, ACSM1, ACSM3, ADI1, AGMO, AGPAT6, AHCY, AHCYL1, AHCYL2, AKR1A1, ALDH1A2, ALDH1L1, ALDH1L2, ALDH4A1, ALDH5A1, ALDH9A1, ALDOB, ALKBH7, ALOX12, ALOX15B, AMDHD1, AMT, ANGPTL3, APOA1, APOA5, APOC2, APOC3, ARG…	1.23841e-13						REACTOME:6985625	Fatty acid, triacylglycerol, and ketone body metabolism	[Group7]	[ACACA, ACAD10, ACAD11, ACADL, ACADM, ACADS, ACADVL, ACAT1, ACLY, ACOT8, ACSF2, ACSF3, ACSL3, ACSL6, AGMO, AGPAT2, AGPAT3, AGPAT4, AGPAT6, BDH2, CPT1B, CPT2, DECR1, DGAT2, ECHS1, ECI1, ELOVL5, FASN, GPAM, GPD1, HADH, HADHA, HADHB, HMGCL, HMGCS2, LOC512541, MCEE, MUT, PCCA, PCCB, PPARA, PPT1, PPT2, PRKAA2, SCD, SLC25A1, SLC25A20, TECR, THEM4]	8.22003e-09
GO:0072329	monocarboxylic acid catabolic process	[Group1]	[ABAT, ABCD1, ABCD3, ACAA1, ACAD10, ACAD11, ACAD9, ACADL, ACADM, ACADS, ACADSB, ACADVL, ACOX1, ACOX2, ACOX3, AKR1A1, ALDH5A1, BDH2, CPT1B, CROT, CYP26A1, DECR1, ECHS1, ECI2, ETFA, ETFB, ETFDH, FAAH, GCDH, HACL1, HADHA, HADHB, HAO1, HOGA1, HSD17B4, IDUA, IRS1, IVD, LONP2, LPIN1, PEX5, PEX7, PHYH, PLIN5, SLC27A2]	7.17105e-11						REACTOME:6985641	Phase 1 - Functionalization of compounds	[Group2]	[ACSS2, ADH4, ADH5, ALDH1A1, ALDH2, AOC1, AOC3, BREH1, CES1, CES2, CYP1A1, CYP1A2, CYP26A1, CYP27A1, CYP2B6, CYP2C87, CYP2E1, CYP2U1, CYP39A1, CYP4A11, CYP4A22, CYP4B1, CYP4F2, CYP51A1, CYP7A1, EPHX1, FDX1, FMO1, FMO2, FMO3, LOC505468, LOC509506, LOC521656, LOC530929, LOC540627, MAOB, NCOA1, PAOX, POMC, PTGS1]	4.66676e-07
GO:0009062	fatty acid catabolic process	[Group1]	[ABCD1, ABCD3, ACAA1, ACAD10, ACAD11, ACAD9, ACADL, ACADM, ACADS, ACADSB, ACADVL, ACOX1, ACOX2, ACOX3, BDH2, CPT1B, CROT, DECR1, ECHS1, ECI2, ETFA, ETFB, ETFDH, FAAH, GCDH, HACL1, HADHA, HADHB, HAO1, HSD17B4, IRS1, IVD, LONP2, LPIN1, PEX5, PEX7, PHYH, PLIN5, SLC27A2]	6.17447e-09						REACTOME:6985624	Mitochondrial Fatty Acid Beta-Oxidation	[Group7]	[ACAD10, ACAD11, ACADL, ACADM, ACADS, ACADVL, DECR1, ECHS1, ECI1, HADH, HADHA, HADHB, MCEE, MUT, PCCA, PCCB]	4.47819e-06
GO:0019395	fatty acid oxidation	[Group1, Group4]	[ABCD1, ABCD3, ACAA1, ACAD10, ACAD11, ACAD9, ACADL, ACADM, ACADS, ACADSB, ACADVL, ACOX1, ACOX2, ACOX3, ALOX12, BDH2, CPT1B, CROT, CYP4V2, DECR1, ECHS1, ETFA, ETFB, ETFDH, GCDH, HACL1, HADHA, HADHB, HAO1, HAO2, HSD17B4, IRS1, IVD, LONP2, PDK4, PEX5, PEX7, PHYH, PLIN5, PPARA, PRKAA1, SLC27A2]	1.1126e-08						REACTOME:6986083	Glutathione conjugation	[Group2]	[AKR1A1, ESD, GCLC, GCLM, GGT1, GSS, GSTA4, GSTK1, GSTM1, GSTM3, GSTP1, GSTT1, GSTT2, GSTZ1, MGST1, MGST2, MGST3, OPLAH]	0.000204314
GO:0034440	monocarboxylic acid metabolic process	[Group4]	[ABAT, ABCD1, ABCD3, ACAA1, ACAA2, ACACA, ACAD10, ACAD11, ACAD9, ACADL, ACADM, ACADS, ACADSB, ACADVL, ACOX1, ACOX2, ACOX3, ACSF2, ACSF3, ACSL3, ACSM1, ACSM3, AGMO, AGPAT6, AKR1A1, ALDH1A2, ALDH5A1, ALDH9A1, ALDOB, ALKBH7, ALOX12, ALOX15B, AMDHD1, ANGPTL3, APOA1, APOA5, APOC2, APOC3, ARV1, BBOX1, BDH2, BTD, C3, CBR4, CPT1B, CPT2, CROT, CRTAP, CRYL1, CYP1A2, CYP26A1, CYP2B6, CYP2C19, CYP2C87, CYP2E…	1.27777e-08						REACTOME:6986003	Complement cascade	[Group3]	[C1QA, C1QB, C1QC, C1S, C2, C3, C4BPB, C6, C8A, C8B, C8G, C9, CD59, CFB, CFD, CFI, MASP1, MASP2, VTN]	0.00294824
GO:0006635	fatty acid beta-oxidation	[Group1]	[ABCD1, ABCD3, ACAA1, ACAD10, ACAD11, ACAD9, ACADL, ACADM, ACADS, ACADSB, ACADVL, ACOX1, ACOX2, ACOX3, BDH2, CPT1B, CROT, DECR1, ECHS1, ETFA, ETFB, ETFDH, GCDH, HADHA, HADHB, HSD17B4, IRS1, IVD, LONP2, PEX5, PEX7, PLIN5, SLC27A2]	1.59487e-07						REACTOME:6985746	Cytochrome P450 - arranged by substrate type	[Group2]	[CYP1A1, CYP1A2, CYP26A1, CYP27A1, CYP2B6, CYP2C87, CYP2E1, CYP2U1, CYP39A1, CYP4A11, CYP4A22, CYP4B1, CYP4F2, CYP51A1, CYP7A1, FDX1, LOC505468, LOC509506, LOC521656, LOC530929, LOC540627, NCOA1, POMC]	0.00355898
GO:1901605	alpha-amino acid metabolic process	[Group5]	[AASDHPPT, ACMSD, ADI1, AHCY, AHCYL1, AHCYL2, ALDH1L1, ALDH1L2, ALDH4A1, ALDH5A1, AMDHD1, AMT, ARG2, ASL, ATAT1, ATPIF1, BHMT, CARNS1, CBS, CCBL2, CPS1, CRTAP, DDAH1, DDAH2, DMGDH, DTD2, EGLN1, EGLN3, ENOPH1, FAH, FPGS, GAMT, GCAT, GCDH, GCLC, GCLM, GCSH, GGH, GGT1, GLDC, GLS, GLS2, GLUD1, GLYAT, GOT2, GPT2, GSTZ1, HAAO, HAL, HARS2, HGD, HIBADH, HNF4A, HOGA1, HPD, HTT, IVD, KMO, MRI1, MTHFD1, MTH…	2.50486e-07						REACTOME:6985734	Peroxisomal lipid metabolism	[Group1]	[ABCD1, ACAA1, ACOT8, ACOX1, ACOX2, ACOX3, CROT, FAR2, HACL1, HSD17B4, IDH1, MLYCD, PHYH, SCP2, SLC27A2]	0.00400661
GO:0043648	dicarboxylic acid metabolic process	[Group2]	[ACMSD, ACOT8, ACSF3, ALDH1L1, ALDH1L2, ALDH4A1, ALDH5A1, AMDHD1, ASL, ATAT1, CCBL2, FH, FPGS, GCLC, GCLM, GLS, GLS2, GLUD1, GOT2, GPT2, HAAO, HAL, HOGA1, HTT, IDH1, IDH3B, KMO, MDH2, MRPS36, MTHFD1, NIT2, NMNAT1, PRODH, PRODH2, QPRT, SDHA, TAT]	2.33319e-06						REACTOME:6986729	Synthesis of (16-20)-hydroxyeicosatetraenoic acids (HETE)	[Group2]	[CYP1A1, CYP1A2, CYP2C87, CYP2U1, CYP4A11, CYP4A22, CYP4F2, LOC505468, LOC509506, LOC540627]	0.00442742
GO:0033539	fatty acid beta-oxidation using acyl-CoA dehydrogenase	[Group1]	[ACAD10, ACAD11, ACAD9, ACADL, ACADM, ACADS, ACADSB, ACADVL, ACOX1, ACOX2, ACOX3, ETFA, ETFB, ETFDH, GCDH, IVD]	1.08275e-05						REACTOME:6985588	Phase II conjugation	[Group2]	[ABHD10, ABHD14B, ACSM1, ACSM2B, AHCY, AKR1A1, BPNT1, CYP1A2, ESD, GCLC, GCLM, GGT1, GLYAT, GSS, GSTA4, GSTK1, GSTM1, GSTM3, GSTP1, GSTT1, GSTT2, GSTZ1, MAT1A, MGST1, MGST2, MGST3, NAT1, OPLAH, SULT1B1, SULT1C4]	0.00457833
GO:0009069	serine family amino acid metabolic process	[Group7]	[AHCY, AHCYL1, AHCYL2, AMT, CBS, DMGDH, GCAT, GCLC, GCLM, GCSH, GGT1, GLDC, GLYAT, MRI1, MTHFD1, PHGDH, PSAT1, PSPH, SEPHS2, SHMT1, SHMT2, TDH, THNSL2]	1.37495e-05						REACTOME:6985945	Bile acid and bile salt metabolism	[Group5]	[ACOT8, ACOX2, ALB, CYP27A1, CYP39A1, CYP7A1, HSD17B4, HSD3B7, LOC527068, NCOA1, SCP2, SLC10A1, SLC27A2, SLC27A5, SLCO1A2, SLCO1B3]	0.00522858
GO:0009063	cellular amino acid catabolic process	[Group1, Group5]	[ABAT, ALDH1L1, ALDH1L2, ALDH4A1, ALDH5A1, AMDHD1, AMT, ATAT1, BCKDHB, DTD2, ENOSF1, FAH, GCAT, GCSH, GLDC, GLS, GLS2, GLUD1, GOT2, GSTZ1, HAAO, HAL, HARS2, HGD, HIBADH, HOGA1, HPD, IVD, KMO, NOS2, NOS3, OTC, PAH, PCYOX1, PIPOX, PRODH, PRODH2, TAT, TDH, THNSL2, UROC1]	2.47465e-05						REACTOME:6986146	Synthesis of bile acids and bile salts via 7alpha-hydroxycholesterol	[Group5]	[ACOT8, ACOX2, CYP27A1, CYP7A1, HSD17B4, HSD3B7, LOC527068, NCOA1, SCP2, SLC27A2, SLC27A5]	0.0118582
GO:0006520	cellular amino acid metabolic process	[Group5]	[AARSD1, AASDHPPT, ABAT, ACMSD, ADI1, AHCY, AHCYL1, AHCYL2, ALDH1L1, ALDH1L2, ALDH4A1, ALDH5A1, AMDHD1, AMT, ARG2, ASL, ATAT1, ATPIF1, BCKDHB, BHMT, CARNS1, CARS2, CBS, CCBL2, CLN3, CPS1, CRTAP, DARS2, DDAH1, DDAH2, DMGDH, DPYD, DTD2, EGLN1, EGLN3, ENOPH1, ENOSF1, FAH, FARS2, FPGS, GAMT, GCAT, GCDH, GCLC, GCLM, GCSH, GGH, GGT1, GLDC, GLS, GLS2, GLUD1, GLYAT, GOT2, GPT2, GSTZ1, HAAO, HAL, HARS2, H…	4.34054e-05						REACTOME:6986138	Cholesterol biosynthesis	[Group4]	[ARV1, CYP51A1, DHCR24, DHCR7, EBP, FDFT1, HMGCR, HMGCS1, IDI1, LSS, MVD, NSDHL, SC5D, SQLE, TM7SF2]	0.0132646
GO:0046394	carboxylic acid biosynthetic process	[Group3]	[AASDHPPT, ABCD3, ACACA, ACADVL, ACSF3, ACSM1, ACSM3, ADI1, AGMO, AKR1A1, ALDH1A2, ALDH4A1, ALDH9A1, ALOX12, APOA1, APOA5, APOC2, APOC3, ASL, ATPIF1, BBOX1, BHMT, CARNS1, CBR4, CBS, CPS1, CYP39A1, CYP7A1, DECR2, DPYD, ELOVL5, ENOPH1, ERLIN2, FADS2, FADS6, FAM213B, FASN, FCER1A, FGFR4, FPGS, GAMT, GGT1, GLS, GLS2, GOT2, GULO, HAAO, HNF1A, HOGA1, HTT, INSIG2, KMO, LIPC, MGST2, MID1IP1, MIF, MLXIPL,…	6.14482e-05						REACTOME:6986145	Synthesis of bile acids and bile salts	[Group5]	[ACOT8, ACOX2, CYP27A1, CYP39A1, CYP7A1, HSD17B4, HSD3B7, LOC527068, NCOA1, SCP2, SLC27A2, SLC27A5]	0.0200195
GO:1901606	alpha-amino acid catabolic process	[Group1, Group5]	[ALDH1L1, ALDH1L2, ALDH4A1, AMDHD1, AMT, ATAT1, DTD2, FAH, GCAT, GCSH, GLDC, GLS, GLS2, GLUD1, GOT2, GSTZ1, HAAO, HAL, HARS2, HGD, HIBADH, HOGA1, HPD, IVD, KMO, NOS2, NOS3, OTC, PAH, PIPOX, PRODH, PRODH2, TAT, TDH, THNSL2, UROC1]	0.000131634						REACTOME:6985728	Triglyceride Biosynthesis	[Group7]	[ACACA, ACLY, ACOT8, ACSF2, ACSF3, ACSL3, ACSL6, AGMO, AGPAT2, AGPAT3, AGPAT4, AGPAT6, DGAT2, ELOVL5, FASN, GPAM, GPD1, LOC512541, PPT1, PPT2, SCD, SLC25A1, TECR, THEM4]	0.027424
GO:0008203	cholesterol metabolic process	[Group6]	[ACADVL, ANGPTL3, APLP2, APOA1, APOA2, APOA5, ARV1, CAT, CFTR, CLN8, CYB5R3, CYP39A1, CYP51A1, CYP7A1, DHCR24, DHCR7, ERLIN2, FDFT1, FDX1, FGF1, HMGCR, HMGCS2, HNF1A, IDI1, INSIG2, LCAT, LDLR, LIPC, LMF1, LRP5, LSS, MVD, NPC2, NSDHL, SCAP, SOAT2, SOD1, SREBF1, TM7SF2]	0.000400763						REACTOME:6985608	Metabolism of amino acids and derivatives	[Group6]	[ACADSB, ACAT1, ADI1, AGMAT, AHCY, ALDH4A1, ALDH7A1, ALDH9A1, AMDHD1, AMT, ARG2, ASL, ASPA, BBOX1, BCKDHA, BCKDHB, BHMT, CBS, CKMT2, CPS1, CRYM, DBT, DIO1, ENOPH1, FAH, FTCD, GAMT, GCDH, GCLC, GCLM, GCSH, GLDC, GLS, GLS2, GLUD1, GOT2, GPT2, GRHPR, GSTZ1, HAAO, HAL, HAO1, HGD, HIBADH, HPD, HSD17B10, IVD, KMO, MAT1A, MCCC1, MRI1, NAALAD2, NQO1, OAZ2, OTC, PAH, PAOX, PCBD1, PHGDH, PIPOX, PPM1K, PROD…	0.0326189
GO:0016126	sterol biosynthetic process	[Group6]	[APOA1, APOA5, CFTR, CYB5R1, CYB5R3, CYP51A1, DHCR7, EBP, ERLIN2, FDFT1, FGF1, HMGCR, HMGCS2, IDI1, INSIG2, LSS, MVD, NSDHL, SCAP, SOD1, SREBF1, TM7SF2]	0.0084987						REACTOME:6986002	Initial triggering of complement	[Group3]	[C1QA, C1QB, C1QC, C1S, C2, C3, CFB, CFD, MASP1, MASP2]	0.034028
GO:0006536	glutamate metabolic process	[Group2]	[ALDH4A1, ALDH5A1, AMDHD1, ASL, ATAT1, FPGS, GCLC, GCLM, GLS, GLS2, GLUD1, GOT2, HAL, PRODH, PRODH2, TAT]	0.012842						REACTOME:6985727	Fatty Acyl-CoA Biosynthesis	[Group7]	[ACACA, ACLY, ACOT8, ACSF2, ACSF3, ACSL3, ACSL6, ELOVL5, FASN, LOC512541, PPT1, PPT2, SCD, SLC25A1, TECR, THEM4]	0.0393304
GO:0072330	monocarboxylic acid biosynthetic process	[Group3]	[ABCD3, ACACA, ACADVL, ACSF3, ACSM1, ACSM3, AGMO, ALDH1A2, ALDH9A1, ALOX12, APOA1, APOA5, APOC2, APOC3, BBOX1, CBR4, CYP39A1, CYP7A1, DECR2, ELOVL5, ERLIN2, FADS2, FADS6, FAM213B, FASN, FCER1A, FGFR4, HNF1A, HOGA1, HTT, INSIG2, LIPC, MGST2, MID1IP1, MIF, MLXIPL, MLYCD, PDDC1, PDK4, PTGDS, PTGS1, PTPLAD2, RDH10, RNPEP, RNPEPL1, SC5D, SCAP, SCD, SCD5, SLC27A2, SLC27A5, TECR, THNSL2]	0.0315542						REACTOME:6985758	mitochondrial fatty acid beta-oxidation of saturated fatty acids	[Group7]	[ACADL, ACADM, ACADS, ACADVL, ECHS1, HADH, HADHA, HADHB]	0.0430452
GO:0006695	cholesterol biosynthetic process	[Group6]	[APOA1, APOA5, CFTR, CYB5R3, CYP51A1, DHCR7, ERLIN2, FDFT1, FGF1, HMGCR, HMGCS2, IDI1, INSIG2, LSS, MVD, NSDHL, SCAP, SOD1, SREBF1, TM7SF2]	0.0434241
GO:1902653	secondary alcohol biosynthetic process	[Group6]	[APOA1, APOA5, CFTR, CYB5R3, CYP51A1, DHCR7, ERLIN2, FDFT1, FGF1, HMGCR, HMGCS2, IDI1, INSIG2, LSS, MVD, NSDHL, SCAP, SOD1, SREBF1, TM7SF2]	0.0434241

## Sheet: brown
Biological Process (BP)					Molecular Function (MF)					REACTOME pathway
BP GOID	BP GOTerm	BP GO Groups	Associated Genes Found	Term PValue Corrected with Benjamini-Hochberg	MF GOID	MF GOTerm	MF GO Groups	Associated Genes Found	Term PValue Corrected with Benjamini-Hochberg	REACTOME ID	REACTOME Pathway	REACTOME Groups	Associated Genes Found	Term PValue Corrected with Benjamini-Hochberg
GO:0051301	cell division	[Group10, Group16]	[ALKBH4, ANLN, AURKA, BIRC5, CCNB1, CCNB2, CD28, CDC20, CINP, CKAP2, CKS2, E2F8, ERCC6L, FAM83D, FGF1, KLHL21, MTBP, NCAPH, NUSAP1, RACGAP1, SKA2, SKA3, SPIRE2, TGFB1]	2.27787e-09	GO:0015631	tubulin binding	[Group0]	[BIRC5, EML2, FAM83D, FES, KIF19, KIF24, NUSAP1, RAB11FIP5, RACGAP1, SKA2, STMN1]	0.000273954	REACTOME:6986679	Mitotic Prometaphase	[Group0, Group2]	[BIRC5, CCNB1, CCNB2, CDC20, CENPF, CENPM, CENPO, CENPP, ERCC6L, NCAPH, SGOL1, SKA2, SMC4]	3.1025e-08
GO:0007049	cell cycle	[Group10]	[ALKBH4, ANLN, AURKA, BIRC5, CCNB1, CCNB2, CD28, CDC20, CENPF, CHAF1A, CINP, CKAP2, CKS2, CSNK1D, E2F8, ERCC6L, FAM83D, KLHL21, LIN37, LLGL1, MCM2, MCM5, MTBP, NCAPH, NUSAP1, PLK4, PRKCD, RACGAP1, SGOL1, SKA2, SKA3, SMC4, SPIRE2, STRADA, TACC2, TGFB1, TIMELESS, UHRF1]	3.78273e-09	GO:0008017	microtubule binding	[Group0]	[BIRC5, EML2, FAM83D, FES, KIF19, KIF24, NUSAP1, RACGAP1, SKA2]	0.000380736	REACTOME:6985540	Cell Cycle	[Group0]	[AURKA, BIRC5, CCNB1, CCNB2, CDC20, CENPF, CENPM, CENPO, CENPP, CEP78, CSNK1D, ERCC6L, LIN37, LOC511168, MCM5, NCAPH, OIP5, PLK4, POLD3, POLE2, PSMB10, SGOL1, SKA2, SMC4]	3.6005e-08
GO:0031109	microtubule polymerization or depolymerization	[Group8]	[AURKA, CCNB1, CKAP2, CSNK1D, EML2, FES, KIF19, KIF24, SKA2, SKA3, STMN1]	2.50843e-08	GO:0017137	Rab GTPase binding	[Group1]	[LLGL1, RAB11FIP5, STXBP5, UNC13D]	0.0323231	REACTOME:6985539	Cell Cycle, Mitotic	[Group0, Group2]	[AURKA, BIRC5, CCNB1, CCNB2, CDC20, CENPF, CENPM, CENPO, CENPP, CEP78, CSNK1D, ERCC6L, LIN37, MCM5, NCAPH, PLK4, POLD3, POLE2, PSMB10, SGOL1, SKA2, SMC4]	3.71619e-08
GO:0022402	cell cycle process	[Group10, Group8]	[ALKBH4, ANLN, AURKA, BIRC5, CCNB1, CCNB2, CD28, CDC20, CENPF, CKAP2, CKS2, CSNK1D, E2F8, ERCC6L, FAM83D, KLHL21, LLGL1, MTBP, NCAPH, NUSAP1, PLK4, RACGAP1, SGOL1, SKA2, SKA3, SMC4, SPIRE2, TACC2, TGFB1, TIMELESS]	9.96316e-08						REACTOME:6986678	Resolution of Sister Chromatid Cohesion	[Group2]	[BIRC5, CCNB1, CCNB2, CDC20, CENPF, CENPM, CENPO, CENPP, ERCC6L, SGOL1, SKA2]	7.95279e-07
GO:0000226	microtubule cytoskeleton organization	[Group1, Group10, Group8]	[AURKA, BIRC5, CCNB1, CKAP2, CSNK1D, EML2, FES, KIF19, KIF24, LLGL1, NUSAP1, PLK4, RACGAP1, SGOL1, SKA2, SKA3, SPIRE2, STMN1, TACC2]	1.57074e-07						REACTOME:6985924	M Phase	[Group0, Group2]	[BIRC5, CCNB1, CCNB2, CDC20, CENPF, CENPM, CENPO, CENPP, ERCC6L, NCAPH, PSMB10, SGOL1, SKA2, SMC4]	2.16754e-05
GO:0000280	nuclear division	[Group10, Group5]	[AURKA, BIRC5, CCNB1, CCNB2, CD28, CDC20, CKS2, ERCC6L, FAM83D, KLHL21, MTBP, NCAPH, NUSAP1, RACGAP1, SGOL1, SKA2, SKA3, SMC4, SPIRE2]	1.92465e-07						REACTOME:6986244	RHO GTPases Activate Formins	[Group2]	[BIRC5, CDC20, CENPF, CENPM, CENPO, CENPP, ERCC6L, SGOL1, SKA2]	4.95853e-05
GO:0048285	organelle fission	[Group10, Group5]	[AURKA, BIRC5, CCNB1, CCNB2, CD28, CDC20, CKS2, ERCC6L, FAM83D, KLHL21, MTBP, NCAPH, NUSAP1, RACGAP1, SGOL1, SKA2, SKA3, SMC4, SPIRE2]	5.85454e-07						REACTOME:6985712	RHO GTPase Effectors	[Group2]	[ABL1, BIRC5, CDC20, CENPF, CENPM, CENPO, CENPP, CYBB, ERCC6L, SGOL1, SKA2]	0.000263424
GO:0031110	regulation of microtubule polymerization or depolymerization	[Group8]	[AURKA, CCNB1, CKAP2, EML2, FES, SKA2, SKA3, STMN1]	4.60406e-06						REACTOME:6985971	Chromosome Maintenance	[Group1]	[CENPM, CENPO, CENPP, OIP5, POLD3, POLE2]	0.000286129
GO:0032886	regulation of microtubule-based process	[Group8]	[AURKA, CCNB1, CKAP2, EML2, FES, PLK4, RACGAP1, SKA2, SKA3, STMN1, TACC2]	5.059e-06						REACTOME:6985713	Signaling by Rho GTPases	[Group2]	[ABL1, BIRC5, CDC20, CENPF, CENPM, CENPO, CENPP, CYBB, ERCC6L, RACGAP1, SGOL1, SKA2, SRGAP1]	0.000325988
GO:0007067	mitotic nuclear division	[Group10, Group5]	[AURKA, BIRC5, CCNB1, CCNB2, CD28, ERCC6L, FAM83D, KLHL21, MTBP, NCAPH, NUSAP1, RACGAP1, SKA2, SKA3, SMC4]	5.79364e-06						REACTOME:6986078	Separation of Sister Chromatids	[Group2]	[BIRC5, CDC20, CENPF, CENPM, CENPO, CENPP, ERCC6L, PSMB10, SGOL1, SKA2]	0.000328751
GO:0007017	microtubule-based process	[Group1, Group10, Group8]	[AURKA, BIRC5, CCNB1, CKAP2, CSNK1D, EML2, FES, KIF19, KIF24, LLGL1, NUSAP1, PLK4, RACGAP1, SGOL1, SKA2, SKA3, SPIRE2, STMN1, TACC2]	7.45984e-06						REACTOME:6985967	Mitotic Metaphase and Anaphase	[Group2]	[BIRC5, CDC20, CENPF, CENPM, CENPO, CENPP, ERCC6L, PSMB10, SGOL1, SKA2]	0.000395724
GO:0006323	DNA packaging	[Group11, Group5]	[ASF1B, CCNB1, CENPP, CHAF1A, MCM2, NAA60, NCAPH, NUSAP1, SMC4]	7.79948e-06						REACTOME:6986079	Mitotic Anaphase	[Group2]	[BIRC5, CDC20, CENPF, CENPM, CENPO, CENPP, ERCC6L, PSMB10, SGOL1, SKA2]	0.000406601
GO:0070507	regulation of microtubule cytoskeleton organization	[Group8]	[AURKA, CCNB1, CKAP2, EML2, FES, PLK4, RACGAP1, SKA2, SKA3, STMN1]	8.27634e-06						REACTOME:6986517	Deposition of new CENPA-containing nucleosomes at the centromere	[Group1]	[CENPM, CENPO, CENPP, OIP5]	0.000573909
GO:0071103	DNA conformation change	[Group11]	[ASF1B, CCNB1, CENPP, CHAF1A, MCM2, MCM5, NAA60, NCAPH, NUSAP1, SMC4]	2.20742e-05						REACTOME:6986518	Nucleosome assembly	[Group1]	[CENPM, CENPO, CENPP, OIP5]	0.000573909
GO:0007059	chromosome segregation	[Group0, Group10, Group11, Group5]	[BIRC5, CCNB1, CENPF, FAM83D, NAA60, NCAPH, NUSAP1, RACGAP1, SGOL1, SKA2, SKA3, SMC4]	2.30969e-05						REACTOME:6986757	Regulation of PLK1 Activity at G2/M Transition	[Group3]	[AURKA, CCNB1, CCNB2, CEP78, CSNK1D, PLK4]	0.000615953
GO:1903047	mitotic cell cycle process	[Group10, Group5]	[ANLN, AURKA, BIRC5, CCNB1, CCNB2, CD28, CENPF, CKAP2, ERCC6L, FAM83D, KLHL21, MTBP, NCAPH, NUSAP1, RACGAP1, SKA2, SKA3, SMC4, TGFB1]	2.36298e-05						REACTOME:6985926	G2/M Transition	[Group3]	[AURKA, CCNB1, CCNB2, CEP78, CSNK1D, PLK4]	0.00348684
GO:0007019	microtubule depolymerization	[Group8]	[AURKA, CCNB1, CKAP2, KIF19, KIF24, STMN1]	2.84518e-05						REACTOME:6985927	Mitotic G2-G2/M phases	[Group3]	[AURKA, CCNB1, CCNB2, CEP78, CSNK1D, PLK4]	0.00351391
GO:0000910	cytokinesis	[Group10, Group13, Group16, Group2]	[ALKBH4, ANLN, AURKA, BIRC5, CKAP2, E2F8, KLHL21, NUSAP1, RACGAP1, SPIRE2]	3.03918e-05						REACTOME:6986347	Centrosome maturation	[Group3]	[CCNB1, CEP78, CSNK1D, PLK4]	0.0175422
GO:0061640	cytoskeleton-dependent cytokinesis	[Group16, Group2]	[ALKBH4, ANLN, CKAP2, NUSAP1, RACGAP1, SPIRE2]	3.14341e-05						REACTOME:6986349	Recruitment of mitotic centrosome proteins and complexes	[Group3]	[CCNB1, CEP78, CSNK1D, PLK4]	0.0175422
GO:0090068	positive regulation of cell cycle process	[Group0, Group10]	[BIRC5, CCNB1, CD28, E2F8, FAM83D, MTBP, NUSAP1, PLK4, RACGAP1, TGFB1]	3.2363e-05						REACTOME:6985577	G2/M Checkpoints	[Group4]	[CCNB1, CCNB2, LOC511168, MCM5]	0.0271724
GO:0051302	regulation of cell division	[Group10, Group13, Group16, Group8]	[AURKA, BIRC5, CCNB1, CD28, CDC20, E2F8, FGF1, KLHL21, MTBP, NUSAP1, RACGAP1, TGFB1]	3.42467e-05						REACTOME:6986844	Anchoring of the basal body to the plasma membrane	[Group3]	[CEP78, CSNK1D, KIF24, PLK4]	0.0271724
GO:0000278	mitotic cell cycle	[Group10, Group16, Group5]	[ANLN, AURKA, BIRC5, CCNB1, CCNB2, CD28, CENPF, CKAP2, E2F8, ERCC6L, FAM83D, KLHL21, MTBP, NCAPH, NUSAP1, RACGAP1, SKA2, SKA3, SMC4, TGFB1]	5.89569e-05						REACTOME:6985569	Cell Cycle Checkpoints	[Group4]	[CCNB1, CCNB2, CDC20, LOC511168, MCM5, PSMB10]	0.0312742
GO:0030261	chromosome condensation	[Group10, Group11, Group5]	[CCNB1, NCAPH, NUSAP1, SMC4]	0.000339372
GO:0051493	regulation of cytoskeleton organization	[Group8]	[AURKA, CCNB1, CKAP2, EML2, FES, PLK4, PRKCD, RACGAP1, SKA2, SKA3, SPIRE2, STMN1, TGFB1]	0.000401877
GO:0045066	regulatory T cell differentiation	[Group10, Group21]	[CD28, CTLA4, TGFB1]	0.000552679
GO:0045787	positive regulation of cell cycle	[Group0, Group10]	[BIRC5, CCNB1, CD28, E2F8, FAM83D, MTBP, NUSAP1, PLK4, RACGAP1, TGFB1]	0.000566316
GO:0010564	regulation of cell cycle process	[Group0, Group10, Group16]	[AURKA, BIRC5, CCNB1, CD28, CDC20, CENPF, E2F8, FAM83D, KLHL21, MTBP, NUSAP1, PLK4, RACGAP1, TGFB1]	0.000578697
GO:0044380	protein localization to cytoskeleton	[Group13]	[AURKA, CSNK1D, FAM83D, KLHL21]	0.000603583
GO:0007076	mitotic chromosome condensation	[Group11, Group5]	[NCAPH, NUSAP1, SMC4]	0.000814318
GO:0032506	cytokinetic process	[Group16, Group2]	[ALKBH4, RACGAP1, SPIRE2]	0.000814318
GO:0000281	mitotic cytokinesis	[Group16, Group2]	[ANLN, CKAP2, NUSAP1, RACGAP1]	0.0010299
GO:0034728	nucleosome organization	[Group11]	[ASF1B, CENPP, CHAF1A, MCM2, NAA60, VPS72]	0.00106048
GO:0006334	nucleosome assembly	[Group11]	[ASF1B, CENPP, CHAF1A, MCM2, NAA60]	0.00112568
GO:0098813	nuclear chromosome segregation	[Group0, Group10, Group11, Group14, Group5]	[CCNB1, CENPF, FAM83D, NCAPH, NUSAP1, RACGAP1, SGOL1, SMC4]	0.00147955
GO:0051261	protein depolymerization	[Group8]	[AURKA, CCNB1, CKAP2, KIF19, KIF24, STMN1]	0.00150955
GO:0051640	organelle localization	[Group0, Group1, Group8]	[AURKA, BIRC5, CCNB1, CENPF, FAM83D, FES, LLGL1, NUSAP1, SPIRE2, TACC2, UNC13D]	0.00162912
GO:0006260	DNA replication	[Group6]	[CHAF1A, CINP, E2F8, MCM2, MCM5, MGME1, POLD3, POLE2, TGFB1]	0.00172743
GO:0051781	positive regulation of cell division	[Group10, Group21]	[BIRC5, CD28, FGF1, NUSAP1, RACGAP1, TGFB1]	0.00172793
GO:0071824	protein-DNA complex subunit organization	[Group11]	[ASF1B, CENPO, CENPP, CHAF1A, MCM2, NAA60, VPS72]	0.00188108
GO:0031111	negative regulation of microtubule polymerization or depolymerization	[Group8]	[AURKA, CCNB1, CKAP2, EML2]	0.00193011
GO:0043624	cellular protein complex disassembly	[Group8]	[AURKA, CCNB1, CKAP2, KIF19, KIF24, STMN1]	0.00235493
GO:0007126	meiotic nuclear division	[Group10]	[AURKA, CDC20, CKS2, SGOL1, SMC4, SPIRE2]	0.0026588
GO:0065004	protein-DNA complex assembly	[Group11]	[ASF1B, CENPO, CENPP, CHAF1A, MCM2, NAA60]	0.0026588
GO:0042554	superoxide anion generation	[Group21]	[CYBB, PRKCD, TGFB1]	0.0027186
GO:0060707	trophoblast giant cell differentiation	[Group3]	[E2F8, PLK4, PRDM1]	0.0027186
GO:0031497	chromatin assembly	[Group11]	[ASF1B, CENPP, CHAF1A, MCM2, NAA60]	0.00296272
GO:1903046	meiotic cell cycle process	[Group10]	[AURKA, CDC20, CKS2, SGOL1, SMC4, SPIRE2]	0.00398726
GO:0007051	spindle organization	[Group1, Group13, Group14, Group8]	[AURKA, BIRC5, CCNB1, CSNK1D, RACGAP1, TACC2]	0.0041558
GO:0051783	regulation of nuclear division	[Group0, Group10]	[BIRC5, CCNB1, CD28, CDC20, MTBP, NUSAP1]	0.0043295
GO:0008608	attachment of spindle microtubules to kinetochore	[Group14, Group5, Group8]	[CCNB1, RACGAP1, SGOL1]	0.00460353
GO:0072698	protein localization to microtubule cytoskeleton	[Group13, Group8]	[AURKA, CSNK1D, FAM83D]	0.00460353
GO:0043241	protein complex disassembly	[Group8]	[AURKA, CCNB1, CKAP2, KIF19, KIF24, STMN1]	0.00528872
GO:0051321	meiotic cell cycle	[Group10]	[AURKA, CDC20, CKS2, SGOL1, SMC4, SPIRE2]	0.00581931
GO:0032984	macromolecular complex disassembly	[Group8]	[AURKA, CCNB1, CKAP2, KIF19, KIF24, STMN1]	0.00712757
GO:0050864	regulation of B cell activation	[Group21]	[CD28, CTLA4, MZB1, PRDM1, TGFB1]	0.0079547
GO:0006333	chromatin assembly or disassembly	[Group11]	[ASF1B, CENPP, CHAF1A, MCM2, NAA60]	0.00802316
GO:0050000	chromosome localization	[Group0, Group1, Group10, Group5, Group8]	[BIRC5, CCNB1, CENPF, FAM83D]	0.00809593
GO:0051303	establishment of chromosome localization	[Group0, Group1, Group10, Group5, Group8]	[BIRC5, CCNB1, CENPF, FAM83D]	0.00809593
GO:0007026	negative regulation of microtubule depolymerization	[Group8]	[AURKA, CCNB1, CKAP2]	0.00810919
GO:0031114	regulation of microtubule depolymerization	[Group8]	[AURKA, CCNB1, CKAP2]	0.00868994
GO:0046651	lymphocyte proliferation	[Group21]	[CD28, CTLA4, MZB1, PRDM1, PRKCD, PSMB10, TGFB1]	0.00880274
GO:0018105	peptidyl-serine phosphorylation	[Group8]	[AURKA, CAMK1, CCNB1, CSNK1D, MAP3K12, RASSF2, TGFB1]	0.00885675
GO:0032943	mononuclear cell proliferation	[Group21]	[CD28, CTLA4, MZB1, PRDM1, PRKCD, PSMB10, TGFB1]	0.00885675
GO:0051494	negative regulation of cytoskeleton organization	[Group8]	[AURKA, CCNB1, CKAP2, EML2, PRKCD]	0.00903503
GO:0016572	histone phosphorylation	[Group8]	[AURKA, CCNB1, MAP3K12]	0.00944718
GO:0060706	cell differentiation involved in embryonic placenta development	[Group3]	[E2F8, PLK4, PRDM1]	0.00944718
GO:0007088	regulation of mitotic nuclear division	[Group0, Group10, Group11, Group8]	[BIRC5, CCNB1, CD28, MTBP, NUSAP1]	0.00986093
GO:0045931	positive regulation of mitotic cell cycle	[Group0, Group10, Group11, Group8]	[BIRC5, CCNB1, CD28, MTBP, NUSAP1]	0.00986093
GO:0070661	leukocyte proliferation	[Group21]	[CD28, CTLA4, MZB1, PRDM1, PRKCD, PSMB10, TGFB1]	0.0101398
GO:0002639	positive regulation of immunoglobulin production	[Group10, Group21]	[CD28, MZB1, TGFB1]	0.0102269
GO:0042100	B cell proliferation	[Group21]	[CTLA4, MZB1, PRDM1, PRKCD]	0.0103641
GO:0006261	DNA-dependent DNA replication	[Group6]	[E2F8, MCM2, MCM5, MGME1, POLE2]	0.0108377
GO:0018209	peptidyl-serine modification	[Group8]	[AURKA, CAMK1, CCNB1, CSNK1D, MAP3K12, RASSF2, TGFB1]	0.0108666
GO:0007052	mitotic spindle organization	[Group0, Group10, Group13, Group14, Group8]	[AURKA, BIRC5, CCNB1, RACGAP1]	0.0115296
GO:0002460	adaptive immune response based on somatic recombination of immune receptors built from immunoglobulin superfamily domains	[Group21]	[CD28, MYO1G, PRKCD, SEMA4A, TGFB1, UNC13D]	0.0116516
GO:0042472	inner ear morphogenesis	[Group4]	[ATOH1, PRRX2, SOBP, WDPCP]	0.0120468
GO:0034453	microtubule anchoring	[Group14, Group5, Group8]	[CCNB1, RACGAP1, SGOL1]	0.013059
GO:0051293	establishment of spindle localization	[Group0, Group2]	[LLGL1, NUSAP1, SPIRE2]	0.013059
GO:0051225	spindle assembly	[Group13, Group8]	[AURKA, BIRC5, CSNK1D, RACGAP1]	0.0142461
GO:0042461	photoreceptor cell development	[Group4]	[CNGB1, GRK1, PRDM1]	0.0143256
GO:0045840	positive regulation of mitotic nuclear division	[Group10]	[BIRC5, CD28, NUSAP1]	0.0143256
GO:0032945	negative regulation of mononuclear cell proliferation	[Group21]	[CTLA4, PRDM1, TGFB1]	0.015431
GO:0035306	positive regulation of dephosphorylation	[Group21]	[PPP1R16B, PRKCD, TGFB1]	0.015431
GO:0035307	positive regulation of protein dephosphorylation	[Group21]	[PPP1R16B, PRKCD, TGFB1]	0.015431
GO:0050672	negative regulation of lymphocyte proliferation	[Group21]	[CTLA4, PRDM1, TGFB1]	0.015431
GO:0070664	negative regulation of leukocyte proliferation	[Group21]	[CTLA4, PRDM1, TGFB1]	0.015431
GO:0051656	establishment of organelle localization	[Group0, Group1, Group10, Group2, Group5]	[BIRC5, CCNB1, CENPF, FAM83D, LLGL1, NUSAP1, SPIRE2]	0.0163397
GO:0046785	microtubule polymerization	[Group19]	[CSNK1D, EML2, FES]	0.0165662
GO:0000245	spliceosomal complex assembly	[Group9]	[ISY1, RBM5, SF3B1]	0.0177299
GO:0051653	spindle localization	[Group0, Group2]	[LLGL1, NUSAP1, SPIRE2]	0.0177299
GO:0042113	B cell activation	[Group21]	[CD28, CTLA4, MZB1, PRDM1, PRKCD, TGFB1]	0.0177722
GO:0042471	ear morphogenesis	[Group4]	[ATOH1, PRRX2, SOBP, WDPCP]	0.0181051
GO:0051310	metaphase plate congression	[Group0, Group5]	[CCNB1, CENPF, FAM83D]	0.0189208
GO:0051785	positive regulation of nuclear division	[Group10]	[BIRC5, CD28, NUSAP1]	0.0189208
GO:0051297	centrosome organization	[Group20]	[AURKA, FES, PLK4, SGOL1]	0.0198751
GO:0006801	superoxide metabolic process	[Group21]	[CYBB, PRKCD, TGFB1]	0.0201377
GO:0032465	regulation of cytokinesis	[Group10, Group13, Group16, Group8]	[AURKA, E2F8, KLHL21, RACGAP1]	0.0205342
GO:0000018	regulation of DNA recombination	[Group10, Group21]	[CD28, RAD18, TGFB1]	0.0213794
GO:0002637	regulation of immunoglobulin production	[Group10, Group21]	[CD28, MZB1, TGFB1]	0.0229175
GO:0042439	ethanolamine-containing compound metabolic process	[Group15]	[DBI, FABP5, PRKCD]	0.0229175
GO:0031023	microtubule organizing center organization	[Group20]	[AURKA, FES, PLK4, SGOL1]	0.0240813
GO:0030888	regulation of B cell proliferation	[Group21]	[CTLA4, MZB1, PRDM1]	0.0242141
GO:0046530	photoreceptor cell differentiation	[Group4]	[CNGB1, GRK1, PRDM1]	0.0242141
GO:0090596	sensory organ morphogenesis	[Group4]	[ATOH1, GRK1, PRDM1, PRRX2, SOBP, WDPCP]	0.0244063
GO:0006611	protein export from nucleus	[Group7]	[CAMK1, STRADA, TGFB1]	0.0252418
GO:0002699	positive regulation of immune effector process	[Group21]	[CD28, FES, MZB1, TGFB1, UNC13D]	0.0253095
GO:0044782	cilium organization	[Group18]	[CNGB1, CSNK1D, KIAA0586, KIF24, WDPCP]	0.0253095
GO:0050670	regulation of lymphocyte proliferation	[Group21]	[CD28, CTLA4, MZB1, PRDM1, TGFB1]	0.02574
GO:0051782	negative regulation of cell division	[Group10]	[CCNB1, E2F8, MTBP]	0.0262794
GO:1901989	positive regulation of cell cycle phase transition	[Group0, Group10]	[BIRC5, FAM83D, MTBP]	0.0262794
GO:0032944	regulation of mononuclear cell proliferation	[Group21]	[CD28, CTLA4, MZB1, PRDM1, TGFB1]	0.0264684
GO:0070663	regulation of leukocyte proliferation	[Group21]	[CD28, CTLA4, MZB1, PRDM1, TGFB1]	0.0290265
GO:1901880	negative regulation of protein depolymerization	[Group8]	[AURKA, CCNB1, CKAP2]	0.0296021
GO:0002702	positive regulation of production of molecular mediator of immune response	[Group10, Group21]	[CD28, MZB1, TGFB1]	0.0309943
GO:0043242	negative regulation of protein complex disassembly	[Group8]	[AURKA, CCNB1, CKAP2]	0.0309943
GO:0002429	immune response-activating cell surface receptor signaling pathway	[Group21]	[CD28, CD79B, CTLA4, MYO1G]	0.0311247
GO:0051340	regulation of ligase activity	[Group10]	[ABL1, CCNB1, CDC20]	0.03274
GO:0002449	lymphocyte mediated immunity	[Group21]	[CD28, MYO1G, PRKCD, TGFB1, UNC13D]	0.0341628
GO:0051438	regulation of ubiquitin-protein transferase activity	[Group10]	[ABL1, CCNB1, CDC20]	0.0341709
GO:0000070	mitotic sister chromatid segregation	[Group10, Group11, Group5]	[CCNB1, NCAPH, NUSAP1, SMC4]	0.0353362
GO:0010631	epithelial cell migration	[Group21]	[ANLN, FGF1, SEMA4A, TGFB1, WDPCP]	0.0363359
GO:0002285	lymphocyte activation involved in immune response	[Group21]	[CD28, SEMA4A, TGFB1, UNC13D]	0.0365123
GO:0090132	epithelium migration	[Group21]	[ANLN, FGF1, SEMA4A, TGFB1, WDPCP]	0.0368336
GO:0050871	positive regulation of B cell activation	[Group10, Group21]	[CD28, PRDM1, TGFB1]	0.0370736
GO:0002065	columnar/cuboidal epithelial cell differentiation	[Group4]	[ATOH1, PRDM1, SPDEF, WDPCP]	0.0381637
GO:0002768	immune response-regulating cell surface receptor signaling pathway	[Group21]	[CD28, CD79B, CTLA4, MYO1G]	0.0381637
GO:0050866	negative regulation of cell activation	[Group21]	[CTLA4, PRDM1, PRKCD, TGFB1]	0.0381637
GO:0018107	peptidyl-threonine phosphorylation	[Group21]	[MAP3K12, PRKCD, TGFB1]	0.0381766
GO:0032091	negative regulation of protein binding	[Group12]	[AURKA, CAMK1, TMC8]	0.0381766
GO:0042752	regulation of circadian rhythm	[Group17]	[CRTC1, CSNK1D, TIMELESS]	0.0381766
GO:0002366	leukocyte activation involved in immune response	[Group21]	[CD28, FES, SEMA4A, TGFB1, UNC13D]	0.0382044
GO:0090130	tissue migration	[Group21]	[ANLN, FGF1, SEMA4A, TGFB1, WDPCP]	0.0399643
GO:0048839	inner ear development	[Group4]	[ATOH1, PRRX2, SOBP, WDPCP]	0.0402131
GO:0018210	peptidyl-threonine modification	[Group21]	[MAP3K12, PRKCD, TGFB1]	0.041136
GO:0034111	negative regulation of homotypic cell-cell adhesion	[Group21]	[CTLA4, PRKCD, TGFB1]	0.041136
GO:1901879	regulation of protein depolymerization	[Group8]	[AURKA, CCNB1, CKAP2]	0.0477213

## Sheet: darkgrey
Biological Process (BP)					Molecular Function (MF)					REACTOME pathway
BP GOID	BP GOTerm	BP GO Groups	Associated Genes Found	Term PValue Corrected with Benjamini-Hochberg	MF GOID	MF GOTerm	MF GO Groups	Associated Genes Found	Term PValue Corrected with Benjamini-Hochberg	REACTOME ID	REACTOME Pathway	REACTOME Groups	Associated Genes Found	Term PValue Corrected with Benjamini-Hochberg
GO:0009653	anatomical structure morphogenesis	[Group0, Group114, Group33, Group45, Group95, Group97]	[ACTG2, ASPN, BBS4, BRAF, CCDC66, COL1A2, COL5A2, COL6A1, DAB2, DACT1, DZIP1, EFEMP1, EPB41L3, EPS8, ETS1, FAP, FMOD, FNBP1L, FOXF1, GATA2, HEG1, HEY1, HSPG2, HYAL2, INHBA, IRX3, ITGA8, KDR, LAMB2, LEF1, LOC535280, LUM, MATN2, MEOX2, MFGE8, MYOC, NOTCH4, NTN4, OGN, PKD2, PKDCC, PMP22, RAB11A, RASIP1, RHOU, S100B, SDC2, SLIT3, SMO, SPARC, SYF2, TCF21, TMEM100, TMEM237, TNIK, TNRC6C, TYRO3, VCL, WT…	3.18511e-07	GO:0005539	glycosaminoglycan binding	[Group7]	[ANXA5, CCDC80, DCN, DPYSL3, FMOD, GPNMB, HYAL2, LPL, NOV, OGN, SLIT3, TNXB]	0.000135166	REACTOME:6985885	Extracellular matrix organization	[Group6]	[COL15A1, COL1A2, COL5A2, COL6A1, COL6A3, DCN, EFEMP1, HSPG2, ITGA8, KDR, LAMB2, LTBP1, LUM, PLOD2, SDC2, SPARC, TIMP2]	3.98026e-07
GO:0051239	regulation of multicellular organismal process	[Group23, Group45, Group48, Group51]	[AMIGO2, ANKH, ANXA5, ASPN, ATP1B1, ATP2A2, BBS4, BRAF, CD3E, COL5A2, CRY1, DAB2, DACT1, DPYSL3, EFEMP1, ETS1, F2R, FAP, FMOD, GATA2, GPNMB, GTF2IRD2, HEG1, HEY1, HYAL2, INHBA, IRX3, KDR, LBH, LEF1, LMCD1, LOC535280, LUC7L, LUM, MRVI1, MYSM1, NOTCH4, NTN4, OGN, PKDCC, PRKCH, RAB11A, RAB11FIP5, S100B, SDC2, SLIT3, SMO, SPARC, SYTL2, TIMP2, TMEM100, TNIK, TPBG, WNK1, WWC2, XDH]	3.84774e-06	GO:0005509	calcium ion binding	[Group5]	[ANXA5, ASPN, ATP2A2, BRAF, EFEMP1, EPS15L1, GCA, HEG1, LTBP1, MATN2, NCALD, NOTCH4, PDP1, PKD2, PPP3CB, S100B, SLIT3, SPARC, SVEP1, SYTL2, SYTL4]	0.00032859	REACTOME:6986087	Glycosaminoglycan metabolism	[Group4]	[CHST7, CHST9, DCN, FMOD, HSPG2, HYAL2, LUM, OGN, PAPSS2, SDC2]	2.14576e-05
GO:0000902	cell morphogenesis	[Group0, Group114, Group115, Group117, Group34, Group36, Group45, Group84, Group95]	[BBS4, BRAF, DAB2, DACT1, DZIP1, EPB41L3, EPS8, FMOD, FNBP1L, HEG1, HEY1, ITGA8, KDR, LAMB2, LEF1, LOC535280, LUM, MATN2, MYOC, OGN, RAB11A, RHOU, S100B, SDC2, SLIT3, SMO, SPARC, TMEM100, TMEM237, TNIK, TYRO3, VCL, WTIP]	5.73459e-05	GO:0008201	heparin binding	[Group7]	[ANXA5, CCDC80, FMOD, GPNMB, LPL, NOV, OGN, SLIT3, TNXB]	0.000862717	REACTOME:6986672	Collagen biosynthesis and modifying enzymes	[Group2]	[COL15A1, COL1A2, COL5A2, COL6A1, COL6A3, PLOD2]	0.000880343
GO:0032989	cellular component morphogenesis	[Group0, Group114, Group115, Group117, Group34, Group36, Group84, Group95]	[BBS4, BRAF, DAB2, DACT1, DZIP1, EPB41L3, EPS8, FMOD, FNBP1L, HEG1, HEY1, ITGA8, KDR, LAMB2, LEF1, LOC535280, LUM, MATN2, MYOC, OGN, PMP22, RAB11A, RHOU, S100B, SDC2, SLIT3, SMO, SPARC, TMEM100, TMEM237, TNIK, TYRO3, VCL, WTIP]	6.84117e-05	GO:0005178	integrin binding	[Group2]	[FAP, GPNMB, KDR, LAMB2, MFGE8, NOV, TIMP2]	0.000873949	REACTOME:6986645	Collagen formation	[Group2]	[COL15A1, COL1A2, COL5A2, COL6A1, COL6A3, PLOD2]	0.00245487
GO:0050793	regulation of developmental process	[Group0, Group114, Group115, Group117, Group23, Group36, Group45, Group48, Group51, Group54, Group95]	[AMIGO2, ANKH, ASPN, BBS4, BRAF, CD3E, COL5A2, DAB2, DACT1, DPYSL3, EFEMP1, EPB41L3, EPS8, ETS1, FMOD, FOXF1, GATA2, HEY1, INHBA, IRX3, KDR, LEF1, LOC535280, LPL, LUC7L, MYOC, MYSM1, NOTCH4, NTN4, OGN, PKDCC, PRKCH, RAB11A, RHOU, SDC2, SLIT3, SMO, SPARC, TIMP2, TMEM100, TNIK, TPBG, WTIP, WWC2, XDH]	0.000237723	GO:0005102	receptor binding	[Group4]	[ARHGEF12, BLK, BTC, CRY1, EFEMP1, F2R, FAP, FMOD, GPNMB, HYAL2, IL16, INHBA, KDR, LAMB2, LEF1, LPL, MFGE8, MYOC, NOTCH4, NOV, OGN, PKD2, PLCL1, S100B, SLIT3, SMO, SYTL2, SYTL4, TCF21, TIMP2, YES1]	0.001075	REACTOME:6986670	Chondroitin sulfate/dermatan sulfate metabolism	[Group4]	[CHST7, CHST9, DCN, HSPG2, SDC2]	0.00273035
GO:0022603	regulation of anatomical structure morphogenesis	[Group0, Group102, Group114, Group115, Group117, Group23, Group36, Group45, Group48, Group54, Group95]	[ASPN, BBS4, BRAF, COL5A2, DAB2, DACT1, EPB41L3, EPS8, ETS1, FMOD, GATA2, KDR, LEF1, MYOC, NOTCH4, NTN4, OGN, RAB11A, RHOU, SDC2, SLIT3, SMO, SPARC, TMEM100, TNIK, WTIP, XDH]	0.000252126	GO:0048495	Roundabout binding	[Group7]	[FMOD, OGN, SLIT3]	0.0015127	REACTOME:6986644	Assembly of collagen fibrils and other multimeric structures	[Group2]	[COL15A1, COL1A2, COL5A2, COL6A1, COL6A3]	0.00279617
GO:0001570	vasculogenesis	[Group22, Group29, Group38, Group4, Group40, Group5, Group55, Group57, Group67, Group74, Group82, Group99]	[FOXF1, HEG1, HEY1, KDR, RASIP1, SMO, TMEM100, XDH]	0.00027175	GO:0070742	C2H2 zinc finger domain binding	[Group3]	[GATA2, LEF1, SRRM2]	0.00195365	REACTOME:6986676	Keratan sulfate degradation	[Group3]	[FMOD, LUM, OGN]	0.00333268
GO:0001944	vasculature development	[Group29, Group33, Group40, Group55, Group56, Group57, Group62, Group71, Group99]	[COL1A2, ETS1, FAP, FOXF1, GATA2, HEG1, HEY1, KDR, LEF1, MEOX2, MFGE8, NOTCH4, PKD2, RASIP1, SMO, SPARC, TCF21, TMEM100, TMEM204, XDH, ZFAND5]	0.000415876	GO:0005518	collagen binding	[Group6]	[ASPN, DCN, LUM, SPARC, TNXB]	0.00202619	REACTOME:6986706	Chondroitin sulfate biosynthesis	[Group4]	[CHST7, CHST9, DCN]	0.00668263
GO:0000904	cell morphogenesis involved in differentiation	[Group0, Group102, Group105, Group114, Group115, Group117, Group23, Group34, Group36, Group54, Group63]	[BRAF, DAB2, DACT1, FMOD, HEG1, HEY1, ITGA8, LAMB2, LEF1, LUM, MATN2, MYOC, OGN, RAB11A, S100B, SDC2, SLIT3, SMO, TMEM100, TNIK, TYRO3, VCL]	0.000514944	GO:0030276	clathrin binding	[Group1]	[DAB2, NCALD, SYTL2, SYTL4]	0.015405	REACTOME:6985583	Metabolism of carbohydrates	[Group4]	[CHST7, CHST9, DCN, FMOD, HSPG2, HYAL2, LUM, OGN, PAPSS2, SDC2]	0.00801376
GO:0030182	neuron differentiation	[Group0, Group102, Group105, Group114, Group115, Group117, Group23, Group24, Group34, Group36, Group42, Group45, Group54, Group6, Group63]	[BBS4, BRAF, CCDC66, DACT1, DPYSL3, EPB41L3, FMOD, GATA2, INHBA, IRX3, LAMB2, LEF1, LOC535280, LUM, MATN2, MYOC, NTN4, OGN, RAB11A, S100B, SDC2, SLIT3, SMO, TBC1D24, TIMP2, TNIK, VCL]	0.000526018	GO:0004857	enzyme inhibitor activity	[Group8]	[COL6A3, CST6, HYAL2, LEF1, LOC504219, PRKAR2B, S100B, SCG5, TIMP2, TIMP4]	0.0161375	REACTOME:6986698	A tetrasaccharide linker sequence is required for GAG synthesis	[Group4]	[DCN, HSPG2, SDC2]	0.0141651
GO:0009887	organ morphogenesis	[Group30, Group31, Group32, Group38, Group44, Group55, Group56, Group95, Group97]	[ACTG2, ASPN, BBS4, CCDC66, COL1A2, COL5A2, DAB2, DACT1, EFEMP1, FOXF1, GATA2, HEG1, HEY1, HSPG2, HYAL2, INHBA, IRX3, ITGA8, LEF1, NTN4, PKD2, SLIT3, SMO, TCF21, TMEM100, ZFAND5]	0.000529576	GO:0050839	cell adhesion molecule binding	[Group2]	[FAP, GPNMB, KDR, LAMB2, MFGE8, NOV, TIMP2]	0.0172301	REACTOME:6986526	Keratan sulfate biosynthesis	[Group3]	[FMOD, LUM, OGN]	0.0174672
GO:0009888	tissue development	[Group32, Group38, Group44, Group95, Group97]	[ACTG2, ANKH, ASPN, BBS4, CCDC66, COL5A2, COL6A1, CST6, DAB2, DACT1, EFEMP1, FOXF1, GATA2, HEG1, HEY1, HSPG2, HYAL2, INHBA, IRX3, ITGA8, KDR, LAMB2, LEF1, LUC7L, MEOX2, MYSM1, NTN4, PKD2, PKDCC, PRKCH, RASIP1, SMO, TCF21, TMEM100, TNRC6C, VCL, XDH, ZBTB18, ZFAND5]	0.000714377	GO:0004713	protein tyrosine kinase activity	[Group0]	[BLK, EFEMP1, KDR, PKDCC, TYRO3, YES1]	0.022231	REACTOME:6986746	ECM proteoglycans	[Group5]	[DCN, ITGA8, SPARC]	0.0184069
GO:2000026	regulation of multicellular organismal development	[Group114, Group117, Group23, Group24, Group36, Group42, Group45, Group48, Group51, Group54]	[AMIGO2, ANKH, ASPN, BRAF, CD3E, COL5A2, DAB2, DACT1, DPYSL3, EFEMP1, ETS1, FMOD, GATA2, INHBA, IRX3, KDR, LEF1, LOC535280, LUC7L, MYSM1, NOTCH4, NTN4, OGN, PKDCC, PRKCH, RAB11A, SDC2, SLIT3, SMO, SPARC, TIMP2, TMEM100, TNIK, TPBG, XDH]	0.000729023	GO:0019210	kinase inhibitor activity	[Group8]	[HYAL2, LOC504219, PRKAR2B, S100B]	0.0225062	REACTOME:6986640	Degradation of the extracellular matrix	[Group4]	[COL15A1, DCN, HSPG2, TIMP2]	0.0187655
GO:0048514	blood vessel morphogenesis	[Group29, Group33, Group38, Group40, Group5, Group55, Group56, Group57, Group62, Group71, Group92, Group99]	[ETS1, FAP, FOXF1, GATA2, HEG1, HEY1, KDR, LEF1, MEOX2, MFGE8, NOTCH4, PKD2, RASIP1, SMO, SPARC, TCF21, TMEM100, XDH]	0.00074556	GO:0019838	growth factor binding	[Group9]	[COL1A2, COL6A1, HYAL2, KDR, LTBP1, NOV]	0.023319	REACTOME:6986527	Keratan sulfate/keratin metabolism	[Group3]	[FMOD, LUM, OGN]	0.0203994
GO:0022604	regulation of cell morphogenesis	[Group0, Group102, Group103, Group105, Group114, Group115, Group117, Group24, Group34, Group43, Group45, Group54, Group6, Group84]	[BBS4, BRAF, DAB2, EPB41L3, EPS8, FMOD, KDR, LEF1, MYOC, OGN, RAB11A, RHOU, SDC2, SLIT3, SPARC, TNIK, WTIP]	0.000837099						REACTOME:6986666	Molecules associated with elastic fibres	[Group1]	[EFEMP1, ITGA8, LTBP1]	0.0240107
GO:0048729	tissue morphogenesis	[Group29, Group32, Group33, Group38, Group40, Group41, Group44, Group55, Group57, Group91, Group97, Group99]	[ACTG2, BBS4, CCDC66, DAB2, DACT1, FOXF1, HEG1, HEY1, INHBA, IRX3, ITGA8, KDR, LEF1, NTN4, PKD2, RASIP1, SMO, TCF21, TMEM100, VCL]	0.00085692						REACTOME:6985884	Integrin cell surface interactions	[Group0]	[HSPG2, ITGA8, KDR, LUM]	0.0344036
GO:0048699	generation of neurons	[Group0, Group100, Group102, Group114, Group117, Group23, Group24, Group34, Group36, Group42, Group45, Group54, Group6, Group63]	[BBS4, BRAF, CCDC66, DACT1, DPYSL3, EPB41L3, FMOD, GATA2, INHBA, IRX3, LAMB2, LEF1, LOC535280, LUM, MATN2, MYOC, NTN4, OGN, PRKCH, RAB11A, S100B, SDC2, SLIT3, SMO, TBC1D24, TIMP2, TNIK, VCL]	0.000870241						REACTOME:6986529	Heparan sulfate/heparin (HS-GAG) metabolism	[Group4]	[DCN, HSPG2, SDC2]	0.0347574
GO:0001568	blood vessel development	[Group29, Group33, Group38, Group40, Group55, Group57, Group71, Group99]	[COL1A2, ETS1, FAP, FOXF1, GATA2, HEG1, HEY1, KDR, LEF1, MEOX2, MFGE8, NOTCH4, PKD2, RASIP1, SMO, SPARC, TCF21, TMEM100, XDH]	0.00100917						REACTOME:6986573	Retinoid metabolism and transport	[Group4]	[HSPG2, LPL, SDC2]	0.0358167
GO:0072358	cardiovascular system development	[Group29, Group33, Group56, Group99]	[COL1A2, DDX17, ETS1, FAP, FOXF1, GATA2, HEG1, HEY1, HSPG2, KDR, LEF1, MEOX2, MFGE8, NDRG4, NOTCH4, NXN, PKD2, RASIP1, SMO, SPARC, TCF21, TMEM100, TMEM204, XDH, ZFAND5]	0.00105926						REACTOME:6986667	Elastic fibre formation	[Group1]	[EFEMP1, ITGA8, LTBP1]	0.0358167
GO:0072359	circulatory system development	[Group29, Group33, Group56, Group99]	[COL1A2, DDX17, ETS1, FAP, FOXF1, GATA2, HEG1, HEY1, HSPG2, KDR, LEF1, MEOX2, MFGE8, NDRG4, NOTCH4, NXN, PKD2, RASIP1, SMO, SPARC, TCF21, TMEM100, TMEM204, XDH, ZFAND5]	0.00105926
GO:0007399	nervous system development	[Group0, Group117, Group23, Group24, Group34, Group36, Group42, Group54]	[AMIGO2, BBS4, BRAF, CCDC66, CLDN11, DACT1, DPYSL3, EPB41L3, FMOD, GATA2, HSPG2, INHBA, IRX3, LAMB2, LEF1, LOC535280, LUM, MATN2, MYOC, NDRG4, NTN4, OGN, PKD2, PMP22, PRKCH, RAB11A, S100B, SDC2, SLIT3, SMO, TBC1D24, TIMP2, TNIK, TPBG, TYRO3, VCL]	0.0020776
GO:0048666	neuron development	[Group0, Group102, Group105, Group114, Group115, Group117, Group24, Group34, Group36, Group42, Group54, Group6, Group63]	[BBS4, BRAF, CCDC66, DACT1, DPYSL3, EPB41L3, FMOD, GATA2, LAMB2, LOC535280, LUM, MATN2, MYOC, NTN4, OGN, RAB11A, S100B, SDC2, SLIT3, TBC1D24, TNIK, VCL]	0.00211716
GO:0019722	calcium-mediated signaling	[Group108]	[ATP1B1, ATP2A2, CD3E, KDR, LMCD1, NCALD, PPP3CB, TMEM100]	0.00213388
GO:0016477	cell migration	[Group1, Group13, Group2, Group81, Group84]	[ARHGAP5, BBS4, BRAF, DAB2, DPYSL3, EPS8, ETS1, F2R, FAP, FOXF1, HYAL2, IL16, KDR, LEF1, LOC535280, MATN2, MYOC, MYSM1, NDRG4, NOV, RAB11A, SDC2, SMO, SPARC, TYRO3, VCL, ZFAND5]	0.00215102
GO:0031175	neuron projection development	[Group0, Group102, Group105, Group115, Group117, Group24, Group34, Group36, Group42, Group54, Group6, Group63]	[BBS4, BRAF, DACT1, DPYSL3, EPB41L3, FMOD, LAMB2, LOC535280, LUM, MATN2, MYOC, OGN, RAB11A, S100B, SDC2, SLIT3, TBC1D24, TNIK, VCL]	0.00217419
GO:0023057	negative regulation of signaling	[Group116]	[ASPN, BCL2L2, BRAF, CD3E, CRY1, DAB2, DACT1, GATA2, HEY1, HYAL2, LEF1, LOC535280, MYOC, NDRG4, NOTCH4, NOV, NXN, RAB11FIP5, SLIT3, SYTL4, TCF21, TLE1, TYRO3, WTIP, WWC2, XDH]	0.00218903
GO:0043062	extracellular structure organization	[Group16, Group7]	[CCDC80, COL1A2, FAP, FOXF1, HSPG2, ITGA8, LAMB2, LUM, SERAC1, TNXB]	0.00221473
GO:0006928	movement of cell or subcellular component	[Group0, Group115, Group13, Group2, Group84]	[ARHGAP5, BBS4, BRAF, DAB2, DPYSL3, EPS8, ETS1, F2R, FAP, FMOD, FNBP1L, FOXF1, HYAL2, IL16, KDR, KIF13A, LAMB2, LEF1, LOC535280, MATN2, MYOC, MYSM1, NDRG4, NOV, OGN, RAB11A, SDC2, SLIT3, SMO, SPARC, TYRO3, VCL, ZFAND5]	0.00226158
GO:0035385	Roundabout signaling pathway	[Group102, Group105, Group20, Group43, Group6, Group63, Group72]	[FMOD, OGN, SLIT3]	0.00228492
GO:0042340	keratan sulfate catabolic process	[Group20, Group43, Group63, Group72]	[FMOD, LUM, OGN]	0.00228492
GO:0030198	extracellular matrix organization	[Group16, Group7]	[CCDC80, COL1A2, FAP, FOXF1, HSPG2, ITGA8, LAMB2, LUM, SERAC1, TNXB]	0.00230105
GO:0048646	anatomical structure formation involved in morphogenesis	[Group29, Group32, Group33, Group38, Group95]	[BBS4, COL5A2, COL6A1, DZIP1, EPB41L3, ETS1, FAP, FNBP1L, FOXF1, GATA2, HEY1, INHBA, IRX3, ITGA8, KDR, LEF1, MEOX2, MFGE8, NOTCH4, PMP22, RASIP1, SMO, SPARC, TCF21, TMEM100, TMEM237, TNRC6C]	0.00231514
GO:0006027	glycosaminoglycan catabolic process	[Group20, Group43, Group63, Group72]	[FMOD, HYAL2, LUM, OGN]	0.00239553
GO:0072132	mesenchyme morphogenesis	[Group18, Group28, Group41, Group49, Group55, Group61, Group67, Group74, Group90, Group99]	[ACTG2, FOXF1, HEY1, LEF1, TMEM100]	0.00242056
GO:0022008	neurogenesis	[Group0, Group100, Group102, Group114, Group117, Group23, Group24, Group34, Group36, Group42, Group45, Group54, Group6, Group63]	[BBS4, BRAF, CCDC66, DACT1, DPYSL3, EPB41L3, FMOD, GATA2, INHBA, IRX3, LAMB2, LEF1, LOC535280, LUM, MATN2, MYOC, NTN4, OGN, PRKCH, RAB11A, S100B, SDC2, SLIT3, SMO, TBC1D24, TIMP2, TNIK, VCL]	0.00244726
GO:1903510	mucopolysaccharide metabolic process	[Group20, Group72]	[CHST7, DCN, FMOD, HYAL2, LUM, OGN]	0.00251712
GO:0003008	system process	[Group19, Group66]	[ATP1B1, ATP2A2, ATP6V0A4, BBS4, BRAF, CCDC66, COL1A2, CRY1, F2R, GTF2IRD2, HEG1, HYAL2, INHBA, ITGA8, LAMB2, LEF1, LMCD1, LUM, MRVI1, MYOC, NCALD, NDRG4, PRKAR2B, RAB11FIP5, S100B, TMEM100, WNK1, ZFAND5]	0.00256074
GO:0048858	cell projection morphogenesis	[Group0, Group102, Group105, Group115, Group117, Group24, Group34, Group36, Group42, Group6, Group63]	[BBS4, BRAF, DACT1, DZIP1, EPB41L3, FMOD, FNBP1L, LAMB2, LOC535280, LUM, MATN2, OGN, RAB11A, S100B, SDC2, SLIT3, TMEM237, TNIK, VCL]	0.00261091
GO:0010648	negative regulation of cell communication	[Group116]	[ASPN, BCL2L2, BRAF, CD3E, CRY1, DAB2, DACT1, GATA2, HEY1, HYAL2, LEF1, LOC535280, MYOC, NDRG4, NOTCH4, NOV, NXN, RAB11FIP5, SLIT3, SYTL4, TCF21, TLE1, TYRO3, WTIP, WWC2, XDH]	0.002617
GO:0048812	neuron projection morphogenesis	[Group0, Group102, Group105, Group115, Group117, Group24, Group34, Group36, Group42, Group43, Group54, Group6, Group63]	[BRAF, DACT1, EPB41L3, FMOD, LAMB2, LOC535280, LUM, MATN2, OGN, RAB11A, S100B, SDC2, SLIT3, TNIK, VCL]	0.00267338
GO:0006910	phagocytosis, recognition	[Group17]	[COLEC12, MFGE8, PEAR1]	0.00272479
GO:2000145	regulation of cell motility	[Group1, Group100, Group13, Group2, Group3, Group81, Group84]	[ARHGAP5, BBS4, BRAF, DAB2, DPYSL3, ETS1, F2R, FOXF1, HYAL2, KDR, LEF1, LOC535280, MYOC, MYSM1, NDRG4, NOV, RAB11A, SPARC, VCL]	0.00273082
GO:0001656	metanephros development	[Group106, Group109, Group111, Group30, Group31, Group37, Group40, Group56, Group57, Group65, Group68, Group91]	[IRX3, ITGA8, LAMB2, PKD2, SMO, TCF21]	0.00278816
GO:0006026	aminoglycan catabolic process	[Group20, Group43, Group63, Group72]	[FMOD, HYAL2, LUM, OGN]	0.0029546
GO:0048598	embryonic morphogenesis	[Group106, Group30, Group31, Group32, Group33, Group38, Group44, Group57, Group89, Group91, Group97]	[BBS4, COL5A2, COL6A1, DACT1, EFEMP1, FOXF1, GATA2, HSPG2, INHBA, IRX3, ITGA8, LEF1, PKD2, SMO, SYF2, TCF21, TNRC6C]	0.00297862
GO:0032990	cell part morphogenesis	[Group0, Group102, Group105, Group115, Group117, Group24, Group34, Group36, Group42, Group6, Group63]	[BBS4, BRAF, DACT1, DZIP1, EPB41L3, FMOD, FNBP1L, LAMB2, LOC535280, LUM, MATN2, OGN, RAB11A, S100B, SDC2, SLIT3, TMEM237, TNIK, VCL]	0.00300463
GO:0040012	regulation of locomotion	[Group1, Group100, Group13, Group2, Group3, Group81, Group84]	[ARHGAP5, BBS4, BRAF, DAB2, DPYSL3, ETS1, F2R, FOXF1, HYAL2, IL16, KDR, LEF1, LOC535280, MYOC, MYSM1, NDRG4, NOV, RAB11A, SPARC, VCL]	0.00301322
GO:0045595	regulation of cell differentiation	[Group100, Group102, Group114, Group117, Group23, Group24, Group36, Group42, Group45, Group48, Group51, Group54]	[BRAF, COL5A2, DAB2, DACT1, DPYSL3, EFEMP1, ETS1, FMOD, FOXF1, GATA2, HEY1, INHBA, IRX3, KDR, LEF1, LOC535280, LPL, MYOC, OGN, PKDCC, PRKCH, RAB11A, SDC2, SLIT3, SMO, TIMP2, TMEM100, TNIK, XDH]	0.00302078
GO:0044060	regulation of endocrine process	[Group19, Group47, Group75, Group76]	[CRY1, F2R, INHBA, RAB11FIP5]	0.00349735
GO:0048678	response to axon injury	[Group35, Group63, Group64]	[BRAF, DPYSL3, LAMB2, MATN2]	0.00349735
GO:0030030	cell projection organization	[Group0, Group105, Group117, Group24, Group34, Group36, Group6, Group63]	[BBS4, BRAF, DACT1, DPYSL3, DZIP1, EPB41L3, FMOD, FNBP1L, ITGA8, LAMB2, LOC535280, LUM, MATN2, MYOC, OGN, PMP22, RAB11A, RTTN, S100B, SDC2, SLIT3, TBC1D24, TMEM237, TNIK, VCL]	0.00351192
GO:0030334	regulation of cell migration	[Group1, Group100, Group103, Group13, Group2, Group3, Group81, Group84, Group94]	[ARHGAP5, BRAF, DAB2, DPYSL3, ETS1, F2R, FOXF1, HYAL2, KDR, LEF1, LOC535280, MYOC, MYSM1, NDRG4, NOV, RAB11A, SPARC, VCL]	0.00378509
GO:0048870	cell motility	[Group1, Group13, Group2, Group81, Group84]	[ARHGAP5, BBS4, BRAF, DAB2, DPYSL3, EPS8, ETS1, F2R, FAP, FOXF1, HYAL2, IL16, KDR, LEF1, LOC535280, MATN2, MYOC, MYSM1, NDRG4, NOV, RAB11A, SDC2, SMO, SPARC, TYRO3, VCL, ZFAND5]	0.00383925
GO:0007369	gastrulation	[Group12, Group28, Group31, Group32, Group89, Group91]	[COL5A2, COL6A1, DACT1, FOXF1, INHBA, ITGA8, LEF1, SYF2, TNRC6C]	0.00389605
GO:0072210	metanephric nephron development	[Group106, Group109, Group111, Group112, Group30, Group37, Group40, Group52, Group55, Group57, Group65, Group68, Group88, Group96]	[LAMB2, PKD2, SMO, TCF21]	0.00393769
GO:0019932	second-messenger-mediated signaling	[Group108, Group19, Group66, Group69]	[ATP1B1, ATP2A2, CD3E, KDR, LMCD1, MRVI1, NCALD, PPP3CB, TMEM100]	0.00516354
GO:0002053	positive regulation of mesenchymal cell proliferation	[Group104, Group27, Group4, Group40, Group5, Group52, Group57, Group61, Group81, Group82, Group88, Group96, Group99]	[ARHGAP5, FOXF1, KDR, SMO]	0.00555994
GO:0051270	regulation of cellular component movement	[Group1, Group100, Group13, Group2, Group3, Group81, Group84]	[ARHGAP5, BBS4, BRAF, DAB2, DPYSL3, ETS1, F2R, FOXF1, HYAL2, KDR, LEF1, LOC535280, MYOC, MYSM1, NDRG4, NOV, RAB11A, SPARC, VCL]	0.00557792
GO:0001704	formation of primary germ layer	[Group12, Group28, Group32, Group89, Group91]	[COL5A2, COL6A1, FOXF1, INHBA, ITGA8, LEF1, TNRC6C]	0.0055974
GO:0051094	positive regulation of developmental process	[Group100, Group114, Group23, Group45, Group48, Group51, Group54]	[AMIGO2, BBS4, BRAF, CD3E, DAB2, DACT1, DPYSL3, ETS1, GATA2, HEY1, INHBA, IRX3, KDR, LEF1, LOC535280, LPL, MYOC, NOTCH4, PKDCC, PRKCH, RAB11A, SMO, TMEM100, TPBG]	0.00563081
GO:0060537	muscle tissue development	[Group111, Group29, Group30, Group31, Group41, Group55, Group56, Group62, Group90, Group92, Group97]	[HEG1, HEY1, HSPG2, ITGA8, LEF1, LUC7L, MEOX2, PKD2, SMO, TCF21, ZBTB18, ZFAND5]	0.00568211
GO:1903077	negative regulation of protein localization to plasma membrane	[Group78, Group80]	[DAB2, PKDCC, TMEM59]	0.00588943
GO:1904376	negative regulation of protein localization to cell periphery	[Group78, Group80]	[DAB2, PKDCC, TMEM59]	0.00588943
GO:0030203	glycosaminoglycan metabolic process	[Group20, Group72]	[CHST7, DCN, FMOD, HYAL2, LUM, OGN]	0.00597337
GO:0048675	axon extension	[Group102, Group105, Group20, Group24, Group34, Group43, Group6, Group63, Group72]	[FMOD, LAMB2, OGN, RAB11A, SLIT3, VCL]	0.00636145
GO:0009968	negative regulation of signal transduction	[Group116]	[ASPN, BCL2L2, CD3E, CRY1, DAB2, DACT1, GATA2, HEY1, HYAL2, LEF1, LOC535280, MYOC, NDRG4, NOTCH4, NOV, NXN, SLIT3, TCF21, TLE1, TYRO3, WTIP, WWC2, XDH]	0.00636996
GO:0001525	angiogenesis	[Group29, Group33, Group71]	[ETS1, FAP, GATA2, HEY1, KDR, LEF1, MEOX2, MFGE8, NOTCH4, RASIP1, SPARC, TCF21, TMEM100]	0.00677428
GO:0045601	regulation of endothelial cell differentiation	[Group22, Group4, Group71, Group99]	[KDR, TMEM100, XDH]	0.00734853
GO:0051048	negative regulation of secretion	[Group19, Group47, Group50, Group75, Group76]	[BRAF, CRY1, F2R, FOXF1, RAB11FIP5, SYTL4, WNK1]	0.0074324
GO:0060485	mesenchyme development	[Group106, Group18, Group29, Group30, Group31, Group38, Group40, Group41, Group44, Group5, Group52, Group55, Group56, Group57, Group61, Group62, Group65, Group67, Group68, Group74, Group88, Group90, Group92, Group96, Group97, Group99]	[ACTG2, DAB2, FOXF1, HEY1, LEF1, PKD2, SMO, TCF21, TMEM100]	0.00746549
GO:0045597	positive regulation of cell differentiation	[Group100, Group103, Group23, Group36, Group42, Group45, Group48, Group54]	[BRAF, DAB2, DACT1, DPYSL3, ETS1, GATA2, HEY1, INHBA, IRX3, LEF1, LOC535280, LPL, MYOC, PKDCC, PRKCH, RAB11A, SMO, TMEM100]	0.00762237
GO:0048667	cell morphogenesis involved in neuron differentiation	[Group0, Group102, Group105, Group115, Group117, Group24, Group34, Group36, Group42, Group43, Group54, Group6, Group63]	[BRAF, DACT1, FMOD, LAMB2, LUM, MATN2, OGN, RAB11A, S100B, SDC2, SLIT3, TNIK, VCL]	0.00762335
GO:0051960	regulation of nervous system development	[Group100, Group102, Group105, Group117, Group23, Group24, Group34, Group36, Group42, Group43, Group45, Group48, Group54, Group6]	[AMIGO2, BRAF, DPYSL3, FMOD, GATA2, IRX3, LOC535280, OGN, PRKCH, RAB11A, SDC2, SLIT3, SMO, TIMP2, TNIK, TPBG]	0.00772424
GO:0050878	regulation of body fluid levels	[Group94]	[ANXA5, F2R, HEG1, HYAL2, LBH, PAPSS2, SYTL2, TYRO3, VCL, WNK1, XDH]	0.00773582
GO:0051241	negative regulation of multicellular organismal process	[Group51]	[ANXA5, ASPN, ATP2A2, COL5A2, CRY1, DPYSL3, EFEMP1, F2R, GATA2, GPNMB, IRX3, LEF1, LUC7L, MRVI1, RAB11FIP5, S100B, SMO, SPARC, WNK1, WWC2, XDH]	0.00781214
GO:0006022	aminoglycan metabolic process	[Group20, Group72]	[CHST7, DCN, FMOD, HYAL2, LUM, OGN]	0.00846237
GO:0001945	lymph vessel development	[Group22, Group39]	[HEG1, KDR, TMEM204]	0.00857326
GO:0014002	astrocyte development	[Group111, Group112, Group14, Group37, Group65, Group68]	[LAMB2, S100B, SMO]	0.00857326
GO:0018146	keratan sulfate biosynthetic process	[Group20, Group43, Group63, Group72]	[FMOD, LUM, OGN]	0.00857326
GO:0042339	keratan sulfate metabolic process	[Group20, Group43, Group63, Group72]	[FMOD, LUM, OGN]	0.00857326
GO:0010464	regulation of mesenchymal cell proliferation	[Group104, Group27, Group4, Group40, Group5, Group52, Group57, Group61, Group81, Group82, Group88, Group96, Group99]	[ARHGAP5, FOXF1, KDR, SMO]	0.00949795
GO:0044057	regulation of system process	[Group108, Group19, Group47, Group66, Group69, Group75]	[ATP1B1, ATP2A2, CRY1, F2R, GTF2IRD2, INHBA, LMCD1, MRVI1, RAB11FIP5, TMEM100, WNK1]	0.00978276
GO:0007498	mesoderm development	[Group106, Group110, Group111, Group113, Group15, Group18, Group28, Group31, Group32, Group38, Group40, Group5, Group57, Group61, Group62, Group89, Group90, Group91]	[FOXF1, INHBA, IRX3, ITGA8, LEF1, SMO]	0.0102774
GO:0007009	plasma membrane organization	[Group80]	[ATP1B1, ATP2A2, DAB2, EPB41L3, FNBP1L, PKDCC, RAB11A, TMEM59, TNIK, TSPAN33]	0.0103229
GO:0044273	sulfur compound catabolic process	[Group20, Group43, Group63, Group72]	[FMOD, LUM, OGN]	0.0103938
GO:0035567	non-canonical Wnt signaling pathway	[Group10, Group100, Group103, Group11, Group112, Group79]	[DAB2, DACT1, MYOC, SMO]	0.0104037
GO:0046824	positive regulation of nucleocytoplasmic transport	[Group10, Group11, Group77, Group79]	[DAB2, DACT1, HYAL2, KHDRBS1, PPP3CB, SMO]	0.0105763
GO:0010769	regulation of cell morphogenesis involved in differentiation	[Group100, Group102, Group103, Group105, Group114, Group115, Group117, Group23, Group24, Group34, Group36, Group42, Group43, Group54, Group6, Group63, Group72]	[BRAF, DAB2, FMOD, LEF1, MYOC, OGN, RAB11A, SDC2, SLIT3, TNIK]	0.0106635
GO:0051145	smooth muscle cell differentiation	[Group28, Group49, Group62, Group67, Group74]	[FOXF1, HEY1, ITGA8, TMEM204]	0.0112187
GO:0007264	small GTPase mediated signal transduction	[Group87]	[ARHGAP5, ARHGEF12, ARHGEF25, ARL4A, BCAR3, COL1A2, EPS8, F2R, GEM, MYOC, RAB11A, RAB2A, RAB6A, RASGEF1B, RHOU]	0.0112235
GO:0009855	determination of bilateral symmetry	[Group106, Group109, Group21, Group30, Group40, Group55, Group57, Group61, Group68, Group82, Group88, Group90, Group96]	[FOXF1, LOC535280, PKD2, RTTN, SMO]	0.0113894
GO:0060021	palate development	[Group113, Group15, Group27, Group28, Group53, Group61, Group92]	[INHBA, LEF1, MEOX2, PKDCC, TCF21]	0.0113894
GO:0043501	skeletal muscle adaptation	[Group69]	[ATP2A2, GTF2IRD2, MYOC]	0.011508
GO:0045648	positive regulation of erythrocyte differentiation	[Group113, Group60]	[ETS1, GATA2, INHBA]	0.011508
GO:0050767	regulation of neurogenesis	[Group100, Group102, Group105, Group117, Group23, Group24, Group34, Group36, Group42, Group43, Group54, Group6]	[BRAF, DPYSL3, FMOD, GATA2, IRX3, LOC535280, OGN, PRKCH, RAB11A, SDC2, SLIT3, SMO, TIMP2, TNIK]	0.011531
GO:0007167	enzyme linked receptor protein signaling pathway	[Group85]	[ASPN, BLK, BTC, COL1A2, DAB2, EFEMP1, INHBA, ITGA8, KDR, LEF1, LOC535280, MYOC, NDRG4, TMEM100, TMEM204, XDH, YES1, ZFAND5]	0.0119927
GO:0071363	cellular response to growth factor stimulus	[Group85]	[ASPN, COL1A2, DAB2, HYAL2, ITGA8, KDR, LEF1, LOC535280, SPARC, TMEM100, TMEM204, XDH, YES1]	0.012086
GO:0009799	specification of symmetry	[Group106, Group109, Group21, Group30, Group40, Group55, Group57, Group61, Group68, Group82, Group88, Group90, Group96]	[FOXF1, LOC535280, PKD2, RTTN, SMO]	0.0120966
GO:0061138	morphogenesis of a branching epithelium	[Group106, Group27, Group29, Group30, Group31, Group38, Group40, Group44, Group5, Group52, Group55, Group57, Group61, Group65, Group68, Group82, Group88, Group90, Group96, Group99]	[FOXF1, KDR, LEF1, NTN4, PKD2, RASIP1, SMO, TCF21]	0.0124124
GO:0042306	regulation of protein import into nucleus	[Group10, Group11, Group77, Group78, Group79]	[DAB2, DACT1, HYAL2, NOV, PKD2, PPP3CB, SMO]	0.0127282
GO:0046822	regulation of nucleocytoplasmic transport	[Group10, Group11, Group77, Group78, Group79]	[DAB2, DACT1, HYAL2, KHDRBS1, NOV, PKD2, PPP3CB, SMO]	0.0127926
GO:1904589	regulation of protein import	[Group10, Group11, Group77, Group78, Group79]	[DAB2, DACT1, HYAL2, NOV, PKD2, PPP3CB, SMO]	0.0128174
GO:0016049	cell growth	[Group102, Group34, Group43, Group63]	[EPB41L3, FHL1, FMOD, HYAL2, INHBA, LAMB2, LEF1, NOV, OGN, RAB11A, SLIT3, VCL]	0.0128407
GO:0060284	regulation of cell development	[Group100, Group102, Group103, Group105, Group114, Group115, Group117, Group23, Group24, Group34, Group36, Group42, Group43, Group45, Group48, Group54, Group6]	[BRAF, DAB2, DPYSL3, FMOD, GATA2, IRX3, LEF1, LOC535280, MYOC, OGN, PRKCH, RAB11A, SDC2, SLIT3, SMO, TIMP2, TNIK]	0.0128705
GO:0045664	regulation of neuron differentiation	[Group100, Group102, Group105, Group115, Group117, Group23, Group24, Group34, Group36, Group42, Group43, Group54, Group6, Group63]	[BRAF, DPYSL3, FMOD, GATA2, IRX3, LOC535280, OGN, RAB11A, SDC2, SLIT3, TIMP2, TNIK]	0.012893
GO:0045746	negative regulation of Notch signaling pathway	[Group86]	[GATA2, HEY1, NOTCH4]	0.0129557
GO:0010463	mesenchymal cell proliferation	[Group104, Group27, Group4, Group40, Group5, Group52, Group57, Group61, Group81, Group82, Group88, Group96, Group99]	[ARHGAP5, FOXF1, KDR, SMO]	0.012964
GO:0001667	ameboidal-type cell migration	[Group1, Group101, Group13, Group2, Group81, Group98]	[BRAF, ETS1, FAP, HYAL2, KDR, LEF1, RAB11A, SMO, SPARC, ZFAND5]	0.0132386
GO:0070848	response to growth factor	[Group85]	[ASPN, COL1A2, DAB2, HYAL2, ITGA8, KDR, LEF1, LOC535280, SPARC, TMEM100, TMEM204, XDH, YES1]	0.0134008
GO:0048286	lung alveolus development	[Group104, Group27, Group40, Group52, Group53, Group57, Group82]	[FOXF1, KDR, PKDCC, TCF21]	0.0134804
GO:0042307	positive regulation of protein import into nucleus	[Group10, Group11, Group77, Group79]	[DAB2, DACT1, HYAL2, PPP3CB, SMO]	0.0135377
GO:1903531	negative regulation of secretion by cell	[Group47, Group50, Group75, Group76]	[BRAF, CRY1, F2R, FOXF1, RAB11FIP5, SYTL4]	0.0139177
GO:0048333	mesodermal cell differentiation	[Group28, Group49, Group89, Group91]	[FOXF1, INHBA, ITGA8]	0.0140528
GO:0048745	smooth muscle tissue development	[Group111]	[ITGA8, PKD2, ZFAND5]	0.0140528
GO:0072009	nephron epithelium development	[Group106, Group109, Group111, Group112, Group30, Group37, Group40, Group44, Group55, Group57, Group65, Group68, Group88, Group90]	[IRX3, LAMB2, PKD2, SMO, TCF21]	0.0140652
GO:1904591	positive regulation of protein import	[Group10, Group11, Group77, Group79]	[DAB2, DACT1, HYAL2, PPP3CB, SMO]	0.0140652
GO:0009611	response to wounding	[Group2, Group94]	[ANXA5, BRAF, DPYSL3, ETS1, F2R, FOXF1, HYAL2, LAMB2, LBH, MATN2, NOV, PAPSS2, S100B, TYRO3, VCL]	0.014157
GO:0048568	embryonic organ development	[Group106, Group111, Group30, Group31, Group32, Group40, Group52, Group55, Group56, Group57, Group89, Group91, Group97]	[EFEMP1, FOXF1, GATA2, HSPG2, ITGA8, LEF1, PKD2, PKDCC, SMO, SYF2, TCF21, TNRC6C]	0.0141614
GO:1990138	neuron projection extension	[Group102, Group105, Group20, Group24, Group34, Group43, Group6, Group63, Group72]	[FMOD, LAMB2, OGN, RAB11A, SLIT3, VCL]	0.0142114
GO:0048754	branching morphogenesis of an epithelial tube	[Group106, Group111, Group27, Group29, Group30, Group31, Group38, Group40, Group41, Group44, Group5, Group52, Group55, Group57, Group61, Group65, Group68, Group82, Group88, Group90, Group91, Group96, Group99]	[FOXF1, KDR, LEF1, PKD2, RASIP1, SMO, TCF21]	0.0142578
GO:0002009	morphogenesis of an epithelium	[Group10, Group106, Group32, Group38, Group40, Group44, Group55, Group57, Group65, Group90, Group97]	[BBS4, DAB2, DACT1, FOXF1, IRX3, KDR, LEF1, NTN4, PKD2, RASIP1, SMO, TCF21, VCL]	0.0142839
GO:0090075	relaxation of muscle	[Group108, Group19, Group66, Group69]	[ATP1B1, ATP2A2, MRVI1]	0.0158907
GO:0072659	protein localization to plasma membrane	[Group78, Group80]	[ATP1B1, DAB2, EPB41L3, PKDCC, RAB11A, TMEM59, TNIK, TSPAN33]	0.0164764
GO:0001706	endoderm formation	[Group12, Group89]	[COL5A2, COL6A1, INHBA, TNRC6C]	0.0168989
GO:0001763	morphogenesis of a branching structure	[Group106, Group27, Group29, Group30, Group31, Group38, Group40, Group44, Group5, Group52, Group55, Group57, Group61, Group65, Group68, Group82, Group88, Group90, Group96, Group99]	[FOXF1, KDR, LEF1, NTN4, PKD2, RASIP1, SMO, TCF21]	0.0169684
GO:1990778	protein localization to cell periphery	[Group78, Group80]	[ATP1B1, DAB2, EPB41L3, PKDCC, RAB11A, TMEM59, TNIK, TSPAN33]	0.0169684
GO:0031102	neuron projection regeneration	[Group35, Group63]	[BRAF, LAMB2, MATN2]	0.0179635
GO:0060968	regulation of gene silencing	[Group59]	[PHF2, TNRC6C, WTIP]	0.0179635
GO:0030856	regulation of epithelial cell differentiation	[Group22, Group4, Group71, Group82, Group99]	[KDR, PRKCH, SMO, TMEM100, XDH]	0.0181001
GO:0071559	response to transforming growth factor beta	[Group85]	[ASPN, COL1A2, DAB2, HYAL2, ITGA8, YES1]	0.0181385
GO:0071560	cellular response to transforming growth factor beta stimulus	[Group85]	[ASPN, COL1A2, DAB2, HYAL2, ITGA8, YES1]	0.0181385
GO:1900180	regulation of protein localization to nucleus	[Group10, Group11, Group77, Group78, Group79]	[DAB2, DACT1, HYAL2, NOV, PKD2, PPP3CB, SMO]	0.0192372
GO:2000648	positive regulation of stem cell proliferation	[Group104, Group27, Group4, Group40, Group5, Group52, Group57, Group61, Group81, Group82, Group88, Group96, Group99]	[ARHGAP5, FOXF1, KDR, SMO]	0.01972
GO:0043392	negative regulation of DNA binding	[Group110, Group15, Group18, Group41, Group5, Group55, Group61, Group67, Group90, Group91, Group92]	[HEY1, LEF1, SMO]	0.0198056
GO:0007409	axonogenesis	[Group102, Group105, Group117, Group20, Group24, Group34, Group35, Group36, Group43, Group6, Group63, Group72]	[BRAF, FMOD, LAMB2, LUM, MATN2, OGN, RAB11A, S100B, SLIT3, VCL]	0.0198869
GO:0042063	gliogenesis	[Group100, Group112, Group14, Group37]	[LAMB2, LEF1, MATN2, MYOC, PRKCH, S100B, SMO]	0.019912
GO:1900182	positive regulation of protein localization to nucleus	[Group10, Group11, Group77, Group79]	[DAB2, DACT1, HYAL2, PPP3CB, SMO]	0.0200109
GO:0023061	signal release	[Group47, Group75, Group76]	[ATP2A2, BLK, BRAF, CRY1, INHBA, RAB11FIP5, SCG5, SNAP23, SYTL4]	0.0220601
GO:0046883	regulation of hormone secretion	[Group47, Group75, Group76]	[BLK, CRY1, INHBA, RAB11FIP5, SCG5, SYTL4]	0.0226856
GO:0001707	mesoderm formation	[Group113, Group15, Group28, Group49, Group5, Group53, Group61, Group67, Group85, Group89, Group91]	[FOXF1, INHBA, ITGA8, LEF1]	0.0227621
GO:0006024	glycosaminoglycan biosynthetic process	[Group20, Group43, Group63, Group72]	[CHST7, FMOD, LUM, OGN]	0.0227621
GO:0008593	regulation of Notch signaling pathway	[Group86]	[GATA2, HEY1, NOTCH4, TSPAN33]	0.0227621
GO:0045185	maintenance of protein location	[Group21, Group96]	[BBS4, EPB41L3, LOC535280, PKD2]	0.0227621
GO:0061053	somite development	[Group110, Group15, Group18, Group28, Group40, Group5, Group52, Group53, Group55, Group57, Group61, Group62, Group67, Group82, Group88, Group90, Group91, Group92, Group96]	[FOXF1, LEF1, MEOX2, SMO]	0.0227621
GO:0010811	positive regulation of cell-substrate adhesion	[Group104, Group27, Group7, Group82, Group9]	[BRAF, CCDC80, FOXF1, KDR, MYOC]	0.0236293
GO:0072078	nephron tubule morphogenesis	[Group106, Group109, Group111, Group30, Group40, Group44, Group52, Group55, Group57, Group65, Group68, Group88, Group90, Group96]	[IRX3, PKD2, SMO, TCF21]	0.0243644
GO:0051235	maintenance of location	[Group21]	[ANXA5, BBS4, CRY1, EPB41L3, F2R, LOC535280, LPL, PKD2]	0.0243748
GO:0007219	Notch signaling pathway	[Group71, Group74, Group86]	[GATA2, HEY1, NOTCH4, TIMP4, TMEM100, TSPAN33]	0.0246059
GO:0033144	negative regulation of intracellular steroid hormone receptor signaling pathway	[Group41]	[CRY1, DAB2, TCF21]	0.0247394
GO:0043277	apoptotic cell clearance	[Group17]	[MFGE8, PEAR1, TYRO3]	0.0247394
GO:0046888	negative regulation of hormone secretion	[Group47, Group50, Group75, Group76]	[CRY1, RAB11FIP5, SYTL4]	0.0247394
GO:0046879	hormone secretion	[Group75, Group76]	[BLK, CRY1, INHBA, RAB11FIP5, SCG5, SNAP23, SYTL4]	0.0254574
GO:0040017	positive regulation of locomotion	[Group1, Group103, Group13, Group2, Group81, Group84, Group98]	[ARHGAP5, DAB2, ETS1, F2R, FOXF1, IL16, KDR, LEF1, MYOC, RAB11A, SPARC]	0.0254953
GO:0051046	regulation of secretion	[Group19, Group47, Group75, Group76]	[ATP2A2, BLK, BRAF, CRY1, F2R, FOXF1, HYAL2, INHBA, RAB11FIP5, SCG5, SYTL2, SYTL4, WNK1]	0.0256259
GO:0050886	endocrine process	[Group19, Group47, Group75, Group76]	[CRY1, F2R, INHBA, RAB11FIP5]	0.0256286
GO:0072088	nephron epithelium morphogenesis	[Group106, Group109, Group111, Group30, Group40, Group44, Group52, Group55, Group57, Group65, Group68, Group88, Group90, Group96]	[IRX3, PKD2, SMO, TCF21]	0.0256286
GO:0003073	regulation of systemic arterial blood pressure	[Group66]	[BBS4, F2R, NCALD, WNK1]	0.0267301
GO:0006023	aminoglycan biosynthetic process	[Group20, Group43, Group63, Group72]	[CHST7, FMOD, LUM, OGN]	0.0267301
GO:0007368	determination of left/right symmetry	[Group106, Group109, Group30, Group40, Group5, Group52, Group55, Group57, Group61, Group65, Group68, Group82, Group88, Group90, Group96]	[FOXF1, PKD2, RTTN, SMO]	0.0267301
GO:0042698	ovulation cycle	[Group26]	[INHBA, KDR, SLIT3, TYRO3]	0.0267301
GO:0061333	renal tubule morphogenesis	[Group106, Group109, Group111, Group30, Group40, Group44, Group52, Group55, Group57, Group65, Group68, Group88, Group90, Group96]	[IRX3, PKD2, SMO, TCF21]	0.0267301
GO:0072028	nephron morphogenesis	[Group106, Group109, Group111, Group30, Group40, Group44, Group52, Group55, Group57, Group65, Group68, Group88, Group90, Group96]	[IRX3, PKD2, SMO, TCF21]	0.0267301
GO:0048562	embryonic organ morphogenesis	[Group106, Group109, Group111, Group30, Group31, Group32, Group40, Group52, Group55, Group56, Group57, Group65, Group68, Group88, Group96, Group97]	[EFEMP1, FOXF1, GATA2, HSPG2, ITGA8, PKD2, SMO, TCF21]	0.0268195
GO:1903651	positive regulation of cytoplasmic transport	[Group10, Group11, Group77, Group79]	[DAB2, DACT1, F2R, HYAL2, KHDRBS1, PPP3CB, RHOU, SMO]	0.0268195
GO:0061564	axon development	[Group102, Group105, Group117, Group20, Group24, Group34, Group35, Group36, Group43, Group6, Group63, Group72]	[BRAF, FMOD, LAMB2, LUM, MATN2, OGN, RAB11A, S100B, SLIT3, VCL]	0.0269385
GO:0003197	endocardial cushion development	[Group41, Group49, Group55, Group67, Group74, Group86, Group99]	[FOXF1, HEY1, TMEM100]	0.0269674
GO:0030199	collagen fibril organization	[Group16]	[COL1A2, LUM, TNXB]	0.0269674
GO:0048566	embryonic digestive tract development	[Group27, Group52, Group53]	[FOXF1, PKDCC, TCF21]	0.0269674
GO:0048873	homeostasis of number of cells within a tissue	[Group109, Group52]	[F2R, GATA2, SMO]	0.0269674
GO:0060986	endocrine hormone secretion	[Group19, Group75, Group76]	[CRY1, INHBA, RAB11FIP5]	0.0269674
GO:0007178	transmembrane receptor protein serine/threonine kinase signaling pathway	[Group15, Group28, Group85]	[ASPN, COL1A2, DAB2, INHBA, ITGA8, LEF1, LOC535280, TMEM100]	0.0275072
GO:0072006	nephron development	[Group106, Group109, Group111, Group112, Group30, Group37, Group40, Group44, Group55, Group57, Group65, Group68, Group88, Group90]	[IRX3, LAMB2, PKD2, SMO, TCF21]	0.0277586
GO:1903649	regulation of cytoplasmic transport	[Group10, Group50, Group77, Group78, Group79]	[DAB2, DACT1, F2R, HYAL2, KHDRBS1, NOV, PKD2, PKDCC, PPP3CB, RHOU, SMO]	0.0281752
GO:0035282	segmentation	[Group28, Group5, Group53, Group57, Group61, Group67, Group90, Group91]	[FOXF1, IRX3, LEF1, MEOX2]	0.0282493
GO:0051962	positive regulation of nervous system development	[Group100, Group24, Group42, Group48, Group54]	[AMIGO2, BRAF, DPYSL3, IRX3, LOC535280, PRKCH, RAB11A, SMO, TPBG]	0.0284463
GO:0021879	forebrain neuron differentiation	[Group113, Group15, Group28, Group53, Group60, Group91]	[GATA2, INHBA, LEF1]	0.0284563
GO:0090257	regulation of muscle system process	[Group108, Group19, Group66, Group69]	[ATP1B1, ATP2A2, F2R, GTF2IRD2, LMCD1, MRVI1]	0.0285946
GO:0071229	cellular response to acid chemical	[Group12]	[COL1A2, COL5A2, COL6A1, PKD2, YES1]	0.0287499
GO:0032386	regulation of intracellular transport	[Group10, Group77, Group78, Group79]	[DAB2, DACT1, F2R, FOXF1, HYAL2, KHDRBS1, NDRG4, NOV, PKD2, PKDCC, PPP3CB, RHOU, SMO]	0.0292891
GO:0009914	hormone transport	[Group75, Group76]	[BLK, CRY1, INHBA, RAB11FIP5, SCG5, SNAP23, SYTL4]	0.0293266
GO:0090130	tissue migration	[Group1, Group13, Group81, Group98]	[ACTG2, ETS1, FAP, FOXF1, KDR, RAB11A, SPARC]	0.0293266
GO:0051051	negative regulation of transport	[Group47, Group50, Group75, Group76]	[BRAF, CRY1, F2R, FOXF1, NOV, PKD2, PKDCC, RAB11FIP5, SYTL4, WNK1]	0.0293965
GO:0002244	hematopoietic progenitor cell differentiation	[Group101, Group113, Group60]	[BRAF, GATA2, HYAL2, INHBA, KDR, MLF1]	0.0294806
GO:0048588	developmental cell growth	[Group102, Group105, Group20, Group24, Group34, Group43, Group6, Group63, Group72]	[FMOD, LAMB2, OGN, RAB11A, SLIT3, VCL]	0.0294806
GO:0048332	mesoderm morphogenesis	[Group113, Group15, Group28, Group49, Group5, Group53, Group61, Group67, Group85, Group89, Group91]	[FOXF1, INHBA, ITGA8, LEF1]	0.0296042
GO:0043500	muscle adaptation	[Group69]	[ATP2A2, GTF2IRD2, LMCD1, MYOC]	0.0303918
GO:0060993	kidney morphogenesis	[Group106, Group109, Group111, Group30, Group40, Group44, Group52, Group55, Group57, Group65, Group68, Group88, Group90, Group96]	[IRX3, PKD2, SMO, TCF21]	0.0303918
GO:0010720	positive regulation of cell development	[Group100, Group102, Group103, Group11, Group14, Group2, Group23, Group24, Group36, Group42, Group48, Group54]	[BRAF, DAB2, DPYSL3, IRX3, LEF1, LOC535280, MYOC, PRKCH, RAB11A, SMO]	0.0304706
GO:0072073	kidney epithelium development	[Group106, Group109, Group111, Group112, Group30, Group37, Group40, Group44, Group55, Group57, Group65, Group68, Group88, Group90]	[IRX3, LAMB2, PKD2, SMO, TCF21]	0.0305946
GO:1903828	negative regulation of cellular protein localization	[Group10, Group50, Group77, Group78, Group80]	[DAB2, NOV, PKD2, PKDCC, TMEM59]	0.0305946
GO:0010761	fibroblast migration	[Group1, Group101, Group3, Group60]	[BRAF, HYAL2, ZFAND5]	0.0307639
GO:0014888	striated muscle adaptation	[Group69]	[ATP2A2, GTF2IRD2, MYOC]	0.0307639
GO:0045646	regulation of erythrocyte differentiation	[Group113, Group60]	[ETS1, GATA2, INHBA]	0.0307639
GO:0048846	axon extension involved in axon guidance	[Group102, Group105, Group20, Group43, Group6, Group63, Group72]	[FMOD, OGN, SLIT3]	0.0307639
GO:1902284	neuron projection extension involved in neuron projection guidance	[Group102, Group105, Group20, Group43, Group6, Group63, Group72]	[FMOD, OGN, SLIT3]	0.0307639
GO:0007492	endoderm development	[Group12, Group89]	[COL5A2, COL6A1, INHBA, TNRC6C]	0.0326054
GO:0021782	glial cell development	[Group11, Group112, Group14, Group37, Group65, Group68]	[LAMB2, MYOC, S100B, SMO]	0.0326054
GO:0030335	positive regulation of cell migration	[Group1, Group103, Group13, Group2, Group81, Group82, Group98]	[ARHGAP5, DAB2, ETS1, F2R, FOXF1, KDR, LEF1, MYOC, RAB11A, SPARC]	0.032749
GO:0001503	ossification	[Group15, Group18]	[ANKH, ASPN, ATP6V0A4, COL6A1, HEY1, HSPG2, LEF1, MYOC, PKDCC, SMO]	0.0333234
GO:0048565	digestive tract development	[Group106, Group109, Group27, Group30, Group31, Group40, Group52, Group55, Group57, Group61, Group68, Group82, Group88]	[FOXF1, GATA2, PKDCC, SMO, TCF21]	0.0333339
GO:1901342	regulation of vasculature development	[Group22, Group29, Group4, Group71, Group86, Group98]	[ETS1, GATA2, KDR, NOTCH4, SPARC, TMEM100, XDH]	0.0337054
GO:0072080	nephron tubule development	[Group106, Group109, Group111, Group30, Group40, Group44, Group52, Group55, Group57, Group65, Group68, Group88, Group90, Group96]	[IRX3, PKD2, SMO, TCF21]	0.034046
GO:0014706	striated muscle tissue development	[Group18, Group41, Group53, Group55, Group56, Group61, Group62, Group90, Group92]	[HEG1, HEY1, HSPG2, LEF1, LUC7L, MEOX2, SMO, TCF21, ZBTB18]	0.0351162
GO:0060627	regulation of vesicle-mediated transport	[Group58]	[BLK, BRAF, DAB2, FOXF1, MFGE8, NDRG4, PKDCC, RAB11A, SYTL4, TBC1D5]	0.0353055
GO:2000147	positive regulation of cell motility	[Group1, Group103, Group13, Group2, Group81, Group82, Group98]	[ARHGAP5, DAB2, ETS1, F2R, FOXF1, KDR, LEF1, MYOC, RAB11A, SPARC]	0.0353055
GO:1903533	regulation of protein targeting	[Group10, Group11, Group77, Group78, Group79]	[DAB2, DACT1, HYAL2, NOV, PKD2, PPP3CB, RHOU, SMO]	0.035425
GO:0061326	renal tubule development	[Group106, Group109, Group111, Group30, Group40, Group44, Group52, Group55, Group57, Group65, Group68, Group88, Group90, Group96]	[IRX3, PKD2, SMO, TCF21]	0.0357267
GO:0006606	protein import into nucleus	[Group10, Group11, Group77, Group78, Group79]	[DAB2, DACT1, F2R, HYAL2, NOV, PKD2, PPP3CB, SMO]	0.0360346
GO:0044744	protein targeting to nucleus	[Group10, Group11, Group77, Group78, Group79]	[DAB2, DACT1, F2R, HYAL2, NOV, PKD2, PPP3CB, SMO]	0.0360346
GO:1902593	single-organism nuclear import	[Group10, Group11, Group77, Group78, Group79]	[DAB2, DACT1, F2R, HYAL2, NOV, PKD2, PPP3CB, SMO]	0.0360346
GO:0045216	cell-cell junction organization	[Group39]	[EPB41L3, HEG1, KDR, MYOC, PRKCH, VCL]	0.0365745
GO:0051170	nuclear import	[Group10, Group11, Group77, Group78, Group79]	[DAB2, DACT1, F2R, HYAL2, NOV, PKD2, PPP3CB, SMO]	0.0368709
GO:0010256	endomembrane system organization	[Group80]	[ATP1B1, ATP2A2, DAB2, EPB41L3, FNBP1L, PKDCC, RAB11A, RAB2A, STX16, TMEM59, TNIK, TSPAN33]	0.0380465
GO:0050853	B cell receptor signaling pathway	[Group46]	[BLK, CD38, PRKCH]	0.0381926
GO:0051272	positive regulation of cellular component movement	[Group1, Group103, Group13, Group2, Group81, Group82, Group98]	[ARHGAP5, DAB2, ETS1, F2R, FOXF1, KDR, LEF1, MYOC, RAB11A, SPARC]	0.0382183
GO:0007050	cell cycle arrest	[Group25]	[FAP, INHBA, MLF1, PKD2, PMP22]	0.0382664
GO:0030879	mammary gland development	[Group110, Group15, Group18, Group28, Group29, Group40, Group5, Group55, Group57, Group61, Group82, Group88, Group90, Group91, Group99]	[FOXF1, LEF1, NOTCH4, SMO, XDH]	0.0382664
GO:0051017	actin filament bundle assembly	[Group35, Group64, Group9]	[BBS4, BRAF, DPYSL3, EPS8, MYOC]	0.0382664
GO:0098779	mitophagy in response to mitochondrial depolarization	[Group70]	[ANXA5, ATP1B1, LMCD1, PLOD2, TBC1D5]	0.0382664
GO:0098780	response to mitochondrial depolarisation	[Group70]	[ANXA5, ATP1B1, LMCD1, PLOD2, TBC1D5]	0.0382664
GO:0018108	peptidyl-tyrosine phosphorylation	[Group107]	[BLK, CD3E, EFEMP1, F2R, HYAL2, KDR, PKDCC, TYRO3, YES1]	0.0384816
GO:0060562	epithelial tube morphogenesis	[Group106, Group110, Group111, Group27, Group29, Group30, Group31, Group32, Group38, Group40, Group44, Group5, Group52, Group55, Group57, Group61, Group65, Group68, Group82, Group88, Group90, Group91, Group96, Group99]	[BBS4, FOXF1, IRX3, KDR, LEF1, PKD2, RASIP1, SMO, TCF21]	0.0384816
GO:0045446	endothelial cell differentiation	[Group22, Group39, Group4, Group71, Group99]	[HEG1, KDR, TMEM100, XDH]	0.038961
GO:0018212	peptidyl-tyrosine modification	[Group107]	[BLK, CD3E, EFEMP1, F2R, HYAL2, KDR, PKDCC, TYRO3, YES1]	0.0392255
GO:0000423	macromitophagy	[Group70]	[ANXA5, ATP1B1, LMCD1, PLOD2, TBC1D5]	0.0394399
GO:0008217	regulation of blood pressure	[Group66]	[BBS4, COL1A2, F2R, NCALD, WNK1]	0.0394399
GO:0051224	negative regulation of protein transport	[Group47, Group50, Group76, Group77, Group78]	[F2R, NOV, PKD2, PKDCC, RAB11FIP5, SYTL4]	0.039461
GO:0001738	morphogenesis of a polarized epithelium	[Group11, Group79]	[DAB2, DACT1, FOXF1]	0.0397785
GO:2000134	negative regulation of G1/S transition of mitotic cell cycle	[Group25]	[DACT1, FHL1, PKD2]	0.0397785
GO:0001501	skeletal system development	[Group83]	[COL1A2, COL5A2, EFEMP1, HSPG2, HYAL2, MYOC, PAPSS2, PKDCC, SPARC, WDR5, ZFAND5]	0.0398626
GO:0034446	substrate adhesion-dependent cell spreading	[Group103, Group104, Group64, Group7, Group9]	[BRAF, ITGA8, MYOC, TYRO3]	0.0402817
GO:0046660	female sex differentiation	[Group26]	[INHBA, KDR, SLIT3, TYRO3]	0.0402817
GO:0016358	dendrite development	[Group34]	[BBS4, DACT1, MATN2, SDC2, TNIK]	0.0404081
GO:0061572	actin filament bundle organization	[Group35, Group64, Group9]	[BBS4, BRAF, DPYSL3, EPS8, MYOC]	0.0404081
GO:0048762	mesenchymal cell differentiation	[Group110, Group18, Group38, Group40, Group41, Group55, Group56, Group62, Group67, Group74, Group92]	[DAB2, HEY1, LEF1, SMO, TCF21, TMEM100]	0.0416071
GO:0001655	urogenital system development	[Group106, Group109, Group111, Group30, Group31, Group32, Group40, Group44, Group52, Group55, Group57, Group65, Group68, Group88, Group90, Group91, Group96]	[FOXF1, GATA2, IRX3, ITGA8, LAMB2, PKD2, SMO, TCF21]	0.0416772
GO:0042476	odontogenesis	[Group110, Group113, Group15, Group18, Group28, Group5, Group53, Group61, Group85, Group91]	[ASPN, INHBA, LEF1, SMO]	0.0420725
GO:0010389	regulation of G2/M transition of mitotic cell cycle	[Group73]	[FHL1, RAB11A, SYF2]	0.0422781
GO:0021766	hippocampus development	[Group110, Group15, Group18, Group41, Group5, Group57, Group61, Group91]	[BBS4, LEF1, SMO]	0.0422781
GO:0021872	forebrain generation of neurons	[Group113, Group15, Group28, Group53, Group60, Group91]	[GATA2, INHBA, LEF1]	0.0422781
GO:0048708	astrocyte differentiation	[Group111, Group112, Group14, Group37, Group65, Group68]	[LAMB2, S100B, SMO]	0.0422781
GO:1902807	negative regulation of cell cycle G1/S phase transition	[Group25]	[DACT1, FHL1, PKD2]	0.0422781
GO:0061061	muscle structure development	[Group29, Group41, Group49, Group55, Group56, Group61, Group62, Group90, Group91, Group92]	[ATP2A2, FOXF1, HEG1, HEY1, ITGA8, LEF1, LUC7L, MEOX2, SMO, TCF21, TMEM204, ZBTB18]	0.0423695
GO:0003013	circulatory system process	[Group108, Group19, Group66, Group69]	[ATP1B1, ATP2A2, BBS4, COL1A2, F2R, HEG1, MRVI1, NCALD, WNK1]	0.0426261
GO:0010770	positive regulation of cell morphogenesis involved in differentiation	[Group100, Group102, Group103, Group11, Group115, Group13, Group2, Group54, Group81, Group9]	[BRAF, DAB2, LEF1, MYOC, RAB11A]	0.0428398
GO:0044272	sulfur compound biosynthetic process	[Group20, Group72]	[CHST7, FMOD, LUM, OGN, PAPSS2]	0.0428398
GO:0055123	digestive system development	[Group106, Group109, Group27, Group30, Group31, Group40, Group52, Group55, Group57, Group61, Group68, Group82, Group88]	[FOXF1, GATA2, PKDCC, SMO, TCF21]	0.0428398
GO:0007517	muscle organ development	[Group18, Group29, Group41, Group53, Group55, Group56, Group61, Group62, Group90, Group92]	[HEG1, HEY1, LEF1, LUC7L, MEOX2, SMO, TCF21, ZBTB18]	0.0430566
GO:0034504	protein localization to nucleus	[Group10, Group11, Group44, Group77, Group78, Group79]	[BBS4, DAB2, DACT1, F2R, HYAL2, NOV, PKD2, PPP3CB, SMO]	0.0431947
GO:0010975	regulation of neuron projection development	[Group102, Group105, Group115, Group117, Group24, Group34, Group42, Group43, Group54, Group6, Group63, Group72]	[BRAF, DPYSL3, FMOD, OGN, RAB11A, SDC2, SLIT3, TNIK]	0.0437599
GO:0001756	somitogenesis	[Group28, Group5, Group53, Group61, Group67, Group90, Group91]	[FOXF1, LEF1, MEOX2]	0.0445777
GO:0050770	regulation of axonogenesis	[Group102, Group105, Group115, Group20, Group24, Group34, Group42, Group43, Group54, Group6, Group63, Group72]	[BRAF, FMOD, OGN, RAB11A, SLIT3]	0.0462733
GO:0031344	regulation of cell projection organization	[Group102, Group105, Group115, Group117, Group24, Group34, Group36, Group42, Group43, Group54, Group6, Group63, Group72]	[BBS4, BRAF, DPYSL3, FMOD, FNBP1L, OGN, RAB11A, SDC2, SLIT3, TNIK]	0.0463917
GO:0006909	phagocytosis	[Group17]	[BLK, COLEC12, MFGE8, PEAR1, TYRO3]	0.046844
GO:0007389	pattern specification process	[Group106, Group18, Group40, Group44, Group5, Group55, Group56, Group57, Group61, Group62, Group65, Group67, Group88, Group90, Group91, Group92, Group96]	[FOXF1, HEY1, IRX3, LEF1, LOC535280, MEOX2, PKD2, RTTN, SMO]	0.046934
GO:1903034	regulation of response to wounding	[Group94]	[BRAF, ETS1, F2R, FOXF1, HYAL2, LBH, NOV, S100B, TYRO3]	0.046934
GO:0007548	sex differentiation	[Group26]	[BCL2L2, INHBA, KDR, SLIT3, TCF21, TYRO3]	0.0469977
GO:0006790	sulfur compound metabolic process	[Group20]	[AHCYL2, CHST7, CHST9, DCN, FMOD, LUM, OGN, PAPSS2]	0.0470945
GO:0031589	cell-substrate adhesion	[Group104, Group16, Group7, Group9]	[BRAF, CCDC80, FOXF1, ITGA8, KDR, MYOC, TNXB, TYRO3]	0.0470945
GO:0045639	positive regulation of myeloid cell differentiation	[Group113, Group15, Group28, Group53]	[ETS1, GATA2, INHBA, LEF1]	0.0471357
GO:0021510	spinal cord development	[Group106, Group109, Group111, Group30, Group52, Group65, Group68, Group88, Group96]	[GATA2, PKD2, SMO]	0.0473709
GO:0035987	endodermal cell differentiation	[Group12, Group89]	[COL5A2, COL6A1, INHBA]	0.0473709
GO:0043502	regulation of muscle adaptation	[Group19, Group69]	[ATP2A2, GTF2IRD2, LMCD1]	0.0473709
GO:1902749	regulation of cell cycle G2/M phase transition	[Group73]	[FHL1, RAB11A, SYF2]	0.0473709
GO:1903530	regulation of secretion by cell	[Group19, Group47, Group75, Group76]	[ATP2A2, BLK, BRAF, CRY1, F2R, FOXF1, HYAL2, INHBA, RAB11FIP5, SCG5, SYTL4]	0.0483722
GO:0030336	negative regulation of cell migration	[Group101, Group2, Group3]	[BRAF, DPYSL3, HYAL2, LOC535280, NDRG4, NOV]	0.0484025
GO:0002230	positive regulation of defense response to virus by host	[Group70]	[ANXA5, ATP1B1, LMCD1, TNIK]	0.0487865
GO:0007272	ensheathment of neurons	[Group93]	[CLDN11, EPB41L3, MYOC, PMP22]	0.0487865
GO:0008366	axon ensheathment	[Group93]	[CLDN11, EPB41L3, MYOC, PMP22]	0.0487865
GO:0010634	positive regulation of epithelial cell migration	[Group1, Group13, Group71, Group81, Group98]	[ETS1, KDR, RAB11A, SPARC]	0.0487865
GO:0033157	regulation of intracellular protein transport	[Group10, Group11, Group77, Group78, Group79]	[DAB2, DACT1, HYAL2, NOV, PKD2, PKDCC, PPP3CB, RHOU, SMO]	0.0490078
GO:0032963	collagen metabolic process	[Group8]	[F2R, FAP, TNXB]	0.0492338
GO:0060324	face development	[Group110]	[BBS4, LEF1, ZFAND5]	0.0492338
GO:0071230	cellular response to amino acid stimulus	[Group12]	[COL1A2, COL5A2, COL6A1]	0.0492338
GO:0007596	blood coagulation	[Group94]	[ANXA5, F2R, LBH, PAPSS2, TYRO3, VCL]	0.0493445
GO:0045786	negative regulation of cell cycle	[Group25]	[DACT1, ETS1, FAP, FHL1, INHBA, MLF1, PKD2, PMP22, SYF2]	0.0496344

## Sheet: darkolivergreen
Biological Process (BP)					Molecular Function (MF)					REACTOME pathway
BP GOID	BP GOTerm	BP GO Groups	Associated Genes Found	Term PValue Corrected with Benjamini-Hochberg	MF GOID	MF GOTerm	MF GO Groups	Associated Genes Found	Term PValue Corrected with Benjamini-Hochberg	REACTOME ID	REACTOME Pathway	REACTOME Groups	Associated Genes Found	Term PValue Corrected with Benjamini-Hochberg
GO:0016192	vesicle-mediated transport	[Group4]	[ADRBK2, ANXA3, AP1B1, APOBR, APP, ATP6AP1, BECN1, BLOC1S6, CALCRL, CAP1, CCL5, CD63, CNIH4, COPG2, CYBA, DCTN1, DNM1L, DPYSL2, EXOC1, EZR, FES, HRAS, INPPL1, ITGB2, LRRK2, MRC1, MYH10, MYO1F, NECAP2, NEDD4, PAK1, PEAR1, PSEN1, PYCARD, RALBP1, RNF139, RUFY1, S100A10, S100A13, SCIN, SCYL2, SEC23A, SFT2D1, SNX2, SNX4, SNX5, SNX6, SRPX, STX2, STX4, STXBP3, TRAPPC11, TRAPPC2L, VAMP3, VPS26A, VPS45, V…	0.000317085	-	-	-	-	-	REACTOME:6985712	RHO GTPase Effectors	[Group0]	[ARPC1A, ARPC2, ARPC3, ARPC5, CENPI, CYBA, ITGB3BP, MYH10, MYL6, NSL1, PAK1, PPP2R5E, WIPF1, XPO1, YWHAQ, ZWINT]	0.0365345
GO:0006897	endocytosis	[Group4]	[ADRBK2, ANXA3, APOBR, APP, BECN1, CALCRL, CAP1, CD63, CYBA, DNM1L, DPYSL2, EZR, HRAS, INPPL1, ITGB2, LRRK2, MRC1, NECAP2, NEDD4, PEAR1, PYCARD, RALBP1, RUFY1, SCYL2, SNX2, SNX4, SNX5, SNX6, SRPX, WIPF1]	0.0022121						REACTOME:6986801	EPHB-mediated forward signaling	[Group1]	[ARPC1A, ARPC2, ARPC3, ARPC5, HRAS, PAK1]	0.0498737
GO:0006996	organelle organization	[Group9]	[ACP2, ACTR6, AGTPBP1, AMBRA1, ARID4B, ARPC1A, ARPC2, ARPC3, ARPC5, ATG2A, ATP6V1D, BAHD1, BBS7, BECN1, BNIP3L, BPTF, BRD4, BRD7, BRMS1L, CAP1, CAPG, CAPZA2, CDC42EP3, CENPI, CEP290, CIRBP, CLN5, CLUAP1, CNOT2, CSF1R, CTCF, CUL4B, DCK, DMAP1, DNM1L, DOCK7, DPYSL2, EPS8, ERCC3, EZR, F11R, FAM13B, FBXO7, FES, FHOD1, FOXP1, GPSM2, HAUS1, HDAC1, HDAC6, HEBP2, HNMT, HP1BP3, HRAS, INPPL1, IST1, ITGB3BP…	0.00279855
GO:0032970	regulation of actin filament-based process	[Group11, Group8]	[ARPC1A, ARPC2, ARPC3, ARPC5, CAPG, CAPZA2, CDC42EP3, CSF1R, EPS8, F11R, FES, FHOD1, HRAS, MYO1F, PAK1, PLN, PYCARD, S100A10, SCIN, SH3BGRL3, VASP, WIPF1]	0.00380756
GO:0032956	regulation of actin cytoskeleton organization	[Group11, Group8]	[ARPC1A, ARPC2, ARPC3, ARPC5, CAPG, CAPZA2, CDC42EP3, CSF1R, EPS8, F11R, FES, FHOD1, HRAS, MYO1F, PAK1, PYCARD, S100A10, SCIN, SH3BGRL3, VASP, WIPF1]	0.0040385
GO:0051495	positive regulation of cytoskeleton organization	[Group11, Group8]	[ARPC1A, ARPC2, ARPC3, ARPC5, BECN1, CDC42EP3, FES, FHOD1, HRAS, PAK1, PYCARD, S100A10, SCIN, TUBGCP4, VASP, VPS4B, WIPF1]	0.0044312
GO:0002366	leukocyte activation involved in immune response	[Group1]	[ANXA3, FES, FOXP1, MSH2, MSH6, MYO1F, PSEN1, PTPRC, PYCARD, RNF168, S100A13, SNX4, STAT6, STX4, STXBP3, TYROBP]	0.00588129
GO:0051493	regulation of cytoskeleton organization	[Group11, Group8]	[ARPC1A, ARPC2, ARPC3, ARPC5, BECN1, CAPG, CAPZA2, CDC42EP3, CSF1R, EPS8, F11R, FES, FHOD1, HDAC6, HRAS, MYO1F, PAK1, PYCARD, S100A10, SCIN, SH3BGRL3, TUBGCP4, VASP, VPS4B, WIPF1, XPO1]	0.00617829
GO:0043112	receptor metabolic process	[Group5]	[ADRBK2, BECN1, CALCRL, CD63, ECE1, EZR, HDAC1, HDAC6, ITGB2, NEDD4, NR2F1, PSEN1, SCYL2, VAMP3]	0.00618564
GO:0007015	actin filament organization	[Group11, Group8]	[ARPC1A, ARPC2, ARPC3, ARPC5, CAPG, CAPZA2, CDC42EP3, EPS8, EZR, FHOD1, INPPL1, PAK1, PDLIM3, PRKCI, PYCARD, S100A10, SCIN, SH3BGRL3, TMSB10, TTC17, VASP, WIPF1]	0.00626528
GO:0036230	granulocyte activation	[Group1]	[ANXA3, CCL5, MYO1F, STX4, STXBP3, TYROBP]	0.00987821
GO:0030036	actin cytoskeleton organization	[Group11, Group8]	[ARPC1A, ARPC2, ARPC3, ARPC5, CAP1, CAPG, CAPZA2, CDC42EP3, CSF1R, EPS8, EZR, F11R, FES, FHOD1, FOXP1, HRAS, INPPL1, MYH10, MYO1F, PAK1, PDLIM3, PRKCI, PYCARD, S100A10, SCIN, SH3BGRL3, TMSB10, TTC17, VASP, WIPF1]	0.0100912
GO:0002275	myeloid cell activation involved in immune response	[Group1]	[ANXA3, FES, MYO1F, PYCARD, S100A13, SNX4, STX4, STXBP3, TYROBP]	0.0104072
GO:0007010	cytoskeleton organization	[Group11, Group8, Group9]	[ARPC1A, ARPC2, ARPC3, ARPC5, BECN1, CAP1, CAPG, CAPZA2, CDC42EP3, CSF1R, DOCK7, DPYSL2, EPS8, EZR, F11R, FES, FHOD1, FOXP1, GPSM2, HAUS1, HDAC6, HRAS, INPPL1, LMNA, MYH10, MYO1F, PAK1, PDLIM3, PRKCI, PSTPIP2, PYCARD, S100A10, SCIN, SH3BGRL3, SH3KBP1, SMC3, SSX2IP, TBCE, TMSB10, TTC17, TTLL5, TUBGCP4, VASP, VIM, VPS4B, WIPF1, XPO1]	0.0157077
GO:0030029	actin filament-based process	[Group11, Group8]	[ARPC1A, ARPC2, ARPC3, ARPC5, CAP1, CAPG, CAPZA2, CDC42EP3, CSF1R, EPS8, EZR, F11R, FES, FHOD1, FOXP1, HRAS, INPPL1, MYH10, MYO1F, PAK1, PDLIM3, PLN, PRKCI, PYCARD, S100A10, SCIN, SH3BGRL3, TMSB10, TTC17, VASP, WIPF1]	0.0163295
GO:0006887	exocytosis	[Group1]	[ANXA3, ATP6AP1, CCL5, EXOC1, FES, LRRK2, MYH10, MYO1F, PAK1, PSEN1, S100A13, SCIN, SNX4, STX2, STX4, STXBP3, VAMP3, VPS45, VPS4B]	0.0176991
GO:0032271	regulation of protein polymerization	[Group8]	[ARPC1A, ARPC2, ARPC3, ARPC5, CAPG, CAPZA2, CDC42EP3, EPS8, FES, PYCARD, SCIN, TUBGCP4, VASP, WIPF1]	0.0206219
GO:0008064	regulation of actin polymerization or depolymerization	[Group8]	[ARPC1A, ARPC2, ARPC3, ARPC5, CAPG, CAPZA2, CDC42EP3, EPS8, PYCARD, SCIN, SH3BGRL3, VASP, WIPF1]	0.0237634
GO:0030832	regulation of actin filament length	[Group8]	[ARPC1A, ARPC2, ARPC3, ARPC5, CAPG, CAPZA2, CDC42EP3, EPS8, PYCARD, SCIN, SH3BGRL3, VASP, WIPF1]	0.0237634
GO:0051258	protein polymerization	[Group8]	[ARPC1A, ARPC2, ARPC3, ARPC5, CAPG, CAPZA2, CDC42EP3, DNM1L, EPS8, FES, PYCARD, SCIN, TTC17, TUBGCP4, VASP, WIPF1]	0.0240344
GO:0032273	positive regulation of protein polymerization	[Group8]	[ARPC1A, ARPC2, ARPC3, ARPC5, CDC42EP3, FES, PYCARD, SCIN, TUBGCP4, VASP, WIPF1]	0.0242807
GO:0044089	positive regulation of cellular component biogenesis	[Group8]	[AMIGO2, ARPC1A, ARPC2, ARPC3, ARPC5, CDC42EP3, CNOT2, FES, FHOD1, HDAC6, HRAS, PAK1, PIP4K2A, PYCARD, RALB, S100A10, SCIN, TLR6, TUBGCP4, VASP, VPS4B, WIPF1]	0.0244535
GO:0030833	regulation of actin filament polymerization	[Group8]	[ARPC1A, ARPC2, ARPC3, ARPC5, CAPG, CAPZA2, CDC42EP3, EPS8, PYCARD, SCIN, VASP, WIPF1]	0.0246129
GO:1902589	single-organism organelle organization	[Group11, Group9]	[AMBRA1, ARID4B, ARPC1A, ARPC2, ARPC3, ARPC5, ATG2A, ATP6V1D, BBS7, BECN1, BNIP3L, BRD4, BRD7, BRMS1L, CAP1, CAPG, CAPZA2, CDC42EP3, CEP290, CLUAP1, CSF1R, CTCF, CUL4B, DMAP1, DNM1L, DOCK7, EPS8, EZR, F11R, FAM13B, FBXO7, FES, FHOD1, FOXP1, GPSM2, HAUS1, HDAC1, HDAC6, HEBP2, HRAS, INPPL1, IST1, KIAA0430, LEO1, LMNA, LRRK2, MAP1LC3A, MSH2, MSH6, MSL1, MYH10, MYO1F, NEDD1, PAK1, PDLIM3, PRKCI, PSMD…	0.0247844
GO:0030041	actin filament polymerization	[Group8]	[ARPC1A, ARPC2, ARPC3, ARPC5, CAPG, CAPZA2, CDC42EP3, EPS8, PYCARD, SCIN, TTC17, VASP, WIPF1]	0.0248179
GO:0043162	ubiquitin-dependent protein catabolic process via the multivesicular body sorting pathway	[Group6]	[HDAC6, NEDD4, VPS36, VPS4B]	0.0248483
GO:0042119	neutrophil activation	[Group1]	[ANXA3, CCL5, MYO1F, STXBP3, TYROBP]	0.0256189
GO:0045184	establishment of protein localization	[Group7]	[AP1B1, BANK1, BECN1, BLOC1S6, BNIP3L, CALCRL, CCL5, CD58, CD63, CEP290, CNIH4, COPG2, CSF1R, DNAJC14, DNM1L, DYRK2, EXOC1, EZR, F11R, FBXO7, FOXP1, FZD1, GDI2, GLMN, HDAC6, HNMT, IPO11, IST1, LMNA, LRRK2, NECAP2, NEDD4, NRAS, PDE3B, PKIG, PRKCI, PSEN1, PTTG1IP, PYCARD, RUFY1, S100A10, S100A13, SCAMP2, SEC23A, SNX2, SNX4, SNX5, SNX6, STX2, STX4, STXBP3, TLR6, TOMM5, UGCG, VAMP3, VPS26A, VPS36, VP…	0.0275633
GO:0008154	actin polymerization or depolymerization	[Group8]	[ARPC1A, ARPC2, ARPC3, ARPC5, CAPG, CAPZA2, CDC42EP3, EPS8, PYCARD, SCIN, SH3BGRL3, TTC17, VASP, WIPF1]	0.0280225
GO:0033043	regulation of organelle organization	[Group11, Group8]	[AMBRA1, ARPC1A, ARPC2, ARPC3, ARPC5, BECN1, BNIP3L, BRD7, CAPG, CAPZA2, CDC42EP3, CNOT2, CSF1R, CTCF, DNM1L, EPS8, EZR, F11R, FES, FHOD1, HDAC6, HNMT, HRAS, LMNA, LRRK2, MIER1, MSH2, MYO1F, PAK1, PIP4K2A, PYCARD, RALB, S100A10, SCIN, SH3BGRL3, TADA3, TUBGCP4, UGCG, VASP, VPS4B, WIPF1, XPO1]	0.0413239
GO:0006687	glycosphingolipid metabolic process	[Group10]	[NAGA, PSAP, ST3GAL6, ST6GALNAC2, UGCG]	0.0413624
GO:0001921	positive regulation of receptor recycling	[Group0]	[ECE1, PSEN1, VAMP3]	0.0425215
GO:0010638	positive regulation of organelle organization	[Group8]	[AMBRA1, ARPC1A, ARPC2, ARPC3, ARPC5, BECN1, BRD7, CDC42EP3, CNOT2, DNM1L, FES, FHOD1, HNMT, HRAS, MIER1, PAK1, PIP4K2A, PYCARD, RALB, S100A10, SCIN, TUBGCP4, UGCG, VASP, VPS4B, WIPF1]	0.0436889
GO:0032535	regulation of cellular component size	[Group8]	[ARPC1A, ARPC2, ARPC3, ARPC5, CAPG, CAPZA2, CDC42EP3, DPYSL2, EPS8, EZR, HP1BP3, IST1, NRP1, PLXNC1, PYCARD, SCIN, SH3BGRL3, VASP, WIPF1]	0.0447026
GO:0007033	vacuole organization	[Group2]	[ACP2, AMBRA1, ATG2A, BECN1, CLN5, LRRK2, MAP1LC3A, PIP4K2A, PSEN1, RALB, SRPX, VPS4B]	0.0447988
GO:0002283	neutrophil activation involved in immune response	[Group1]	[ANXA3, MYO1F, STXBP3, TYROBP]	0.045049
GO:0008045	motor neuron axon guidance	[Group3]	[CXCL12, FOXP1, NRP1, PLXNC1]	0.045049
GO:0030838	positive regulation of actin filament polymerization	[Group8]	[ARPC1A, ARPC2, ARPC3, ARPC5, CDC42EP3, PYCARD, SCIN, VASP, WIPF1]	0.0461778

## Sheet: darkred
Biological Process (BP)					Molecular Function (MF)					REACTOME pathway
BP GOID	BP GOTerm	BP GO Groups	Associated Genes Found	Term PValue Corrected with Benjamini-Hochberg	MF GOID	MF GOTerm	MF GO Groups	Associated Genes Found	Term PValue Corrected with Benjamini-Hochberg	REACTOME ID	REACTOME Pathway	REACTOME Groups	Associated Genes Found	Term PValue Corrected with Benjamini-Hochberg
GO:0019065	receptor-mediated endocytosis of virus by host cell	[Group14]	[CAV1, CAV2, EPS15]	0.00598578	-	-	-	-	-	-	-	-	-	-
GO:0075509	endocytosis involved in viral entry into host cell	[Group14]	[CAV1, CAV2, EPS15]	0.00598578
GO:0086103	G-protein coupled receptor signaling pathway involved in heart process	[Group15]	[CAV1, PLN, RAMP3]	0.00598578
GO:0071593	lymphocyte aggregation	[Group12]	[ANXA1, B2M, BCL10, CAV1, CD47, DUSP3, NCK1, NCK2, NEDD4, PTGER4, SLC11A1, SP3, TGFBR2, ZFP36L1, ZFP36L2]	0.0283942
GO:0036499	PERK-mediated unfolded protein response	[Group5]	[NCK1, NCK2, NFE2L2]	0.0322748
GO:0070486	leukocyte aggregation	[Group12]	[ANXA1, B2M, BCL10, CAV1, CD47, DUSP3, NCK1, NCK2, NEDD4, PTGER4, SLC11A1, SP3, TGFBR2, ZFP36L1, ZFP36L2]	0.0329705
GO:0000188	inactivation of MAPK activity	[Group0]	[CAV1, DUSP3, SPRED1]	0.033758
GO:0044766	multi-organism transport	[Group14]	[CAV1, CAV2, EPS15]	0.033758
GO:0046794	transport of virus	[Group14]	[CAV1, CAV2, EPS15]	0.033758
GO:0032970	regulation of actin filament-based process	[Group10]	[ARFIP1, CAV1, CD2AP, CFL2, DIXDC1, NCK1, NCK2, NCKAP1, PLN, PTGER4, RASA1, SRI, TMOD3]	0.0338532
GO:1903507	negative regulation of nucleic acid-templated transcription	[Group16]	[BRMS1L, CAV1, CTBP2, DDX20, DKK3, FNIP1, FZD1, HIST3H2A, ID1, KLF10, MECP2, NCK1, NCK2, NEDD4, NELFA, NIPBL, NONO, PAXBP1, PEX2, PTGIS, RAMP3, RTF1, SP3, URI1, WWP1, YY1, ZNF639]	0.0349706
GO:0006625	protein targeting to peroxisome	[Group13]	[PEX12, PEX2, RAB8B]	0.0351739
GO:0043574	peroxisomal transport	[Group13]	[PEX12, PEX2, RAB8B]	0.0351739
GO:0072662	protein localization to peroxisome	[Group13]	[PEX12, PEX2, RAB8B]	0.0351739
GO:0072663	establishment of protein localization to peroxisome	[Group13]	[PEX12, PEX2, RAB8B]	0.0351739
GO:1902679	negative regulation of RNA biosynthetic process	[Group16]	[BRMS1L, CAV1, CTBP2, DDX20, DKK3, FNIP1, FZD1, HIST3H2A, ID1, KLF10, MECP2, NCK1, NCK2, NEDD4, NELFA, NIPBL, NONO, PAXBP1, PEX2, PTGIS, RAMP3, RTF1, SP3, URI1, WWP1, YY1, ZNF639]	0.0352865
GO:0030260	entry into host cell	[Group14]	[CAV1, CAV2, CTSB, EPS15, ZNF639]	0.0353167
GO:0043487	regulation of RNA stability	[Group4]	[METTL14, SLC11A1, ZC3H14, ZFP36L1, ZFP36L2]	0.0353167
GO:0044409	entry into host	[Group14]	[CAV1, CAV2, CTSB, EPS15, ZNF639]	0.0353167
GO:0051806	entry into cell of other organism involved in symbiotic interaction	[Group14]	[CAV1, CAV2, CTSB, EPS15, ZNF639]	0.0353167
GO:0051828	entry into other organism involved in symbiotic interaction	[Group14]	[CAV1, CAV2, CTSB, EPS15, ZNF639]	0.0353167
GO:0052126	movement in host environment	[Group14]	[CAV1, CAV2, CTSB, EPS15, ZNF639]	0.0353167
GO:0052192	movement in environment of other organism involved in symbiotic interaction	[Group14]	[CAV1, CAV2, CTSB, EPS15, ZNF639]	0.0353167
GO:1903036	positive regulation of response to wounding	[Group8]	[ANXA1, CD47, CTSS, IL33, NFE2L2, PTGER4, TLR3]	0.0354533
GO:0006984	ER-nucleus signaling pathway	[Group5]	[EIF2A, NCK1, NCK2, NFE2L2]	0.0357367
GO:0045934	negative regulation of nucleobase-containing compound metabolic process	[Group16]	[BRMS1L, CAV1, CTBP2, DDX20, DKK3, DYRK1A, FNIP1, FZD1, HIST3H2A, ID1, KLF10, MECP2, NCK1, NCK2, NEDD4, NELFA, NIPBL, NONO, PAXBP1, PEX2, PTGIS, RAMP3, RTF1, SP3, TERF1, URI1, WWP1, YY1, ZC3H14, ZNF639]	0.0359981
GO:0043207	response to external biotic stimulus	[Group11]	[ABCC9, ABR, B2M, BCL10, CAV1, CD47, CLEC6A, DCLK1, IL33, LYZ, MR1, MRC1, MRPS10, NCK1, OAS1Y, POLR3C, PTAFR, PTGER4, SERINC3, SLC11A1, TLR3, URI1]	0.0362547
GO:0051050	positive regulation of transport	[Group8]	[ABR, ANKFY1, ANXA1, B2M, CAV1, CD47, CLEC6A, CREBL2, CRTAM, CTSS, EXOC1, IL33, MCU, MFF, NEDD4, NFE2L2, PTGER4, SLC11A1, SRI, TBC1D20, TLR3, XPO4]	0.0363877
GO:0007565	female pregnancy	[Group2]	[CTSB, LAMB1, PTAFR, PTGIS, SP3, THBD]	0.036561
GO:0002902	regulation of B cell apoptotic process	[Group9]	[BCL10, FNIP1, SLC39A10]	0.0367939
GO:0051253	negative regulation of RNA metabolic process	[Group16]	[BRMS1L, CAV1, CTBP2, DDX20, DKK3, DYRK1A, FNIP1, FZD1, HIST3H2A, ID1, KLF10, MECP2, NCK1, NCK2, NEDD4, NELFA, NIPBL, NONO, PAXBP1, PEX2, PTGIS, RAMP3, RTF1, SP3, URI1, WWP1, YY1, ZC3H14, ZNF639]	0.0376548
GO:0043618	regulation of transcription from RNA polymerase II promoter in response to stress	[Group5]	[NCK1, NCK2, NEDD4, NFE2L2]	0.0376634
GO:1903034	regulation of response to wounding	[Group8]	[ABR, ANXA1, CAV1, CD47, CTSS, IL33, NFE2L2, PDGFRA, PTGER4, PTGIS, TC2N, THBD, TLR3]	0.0377102
GO:0042110	T cell activation	[Group12]	[ANXA1, B2M, BCL10, CAV1, CD47, DUSP3, NCK1, NCK2, NEDD4, PTGER4, SLC11A1, SP3, TGFBR2, ZFP36L1, ZFP36L2]	0.0378765
GO:0046718	viral entry into host cell	[Group14]	[CAV1, CAV2, CTSB, EPS15, ZNF639]	0.0381236
GO:0050854	regulation of antigen receptor-mediated signaling pathway	[Group9]	[BCL10, DUSP3, ELF1, SLC39A10]	0.0398056
GO:1904063	negative regulation of cation transmembrane transport	[Group15]	[CAV1, NEDD4, PLN, SRI]	0.0398056
GO:0007159	leukocyte cell-cell adhesion	[Group12]	[ANXA1, B2M, BCL10, CAV1, CD47, DUSP3, NCK1, NCK2, NEDD4, PTGER4, SLC11A1, SP3, TGFBR2, ZFP36L1, ZFP36L2]	0.0398545
GO:0019751	polyol metabolic process	[Group6]	[ACER3, IMPA2, MECP2, PTAFR, SYNJ1]	0.0403313
GO:0051701	interaction with host	[Group14]	[CAV1, CAV2, CTSB, EPS15, NEDD4, ZNF639]	0.0406135
GO:0034109	homotypic cell-cell adhesion	[Group12]	[ANXA1, B2M, BCL10, CAV1, CD47, DUSP3, NCK1, NCK2, NEDD4, PDGFRA, PTGER4, SLC11A1, SP3, TGFBR2, ZFP36L1, ZFP36L2]	0.0407481
GO:0001775	cell activation	[Group12]	[ABR, ANXA1, B2M, BCL10, CAV1, CD47, DUSP3, FNIP1, IL33, NCK1, NCK2, NEDD4, PDGFRA, PIK3CA, PTGER4, SLC11A1, SLC39A10, SP3, TGFBR2, ZFP36L1, ZFP36L2]	0.0414275
GO:0035295	tube development	[Group3]	[BCL10, COL4A1, DLG5, EDNRB, ENAH, FZD1, GJA1, KIF3A, NCKAP1, NIPBL, PDGFRA, SMAD5, SOSTDC1, SP3, TBC1D20, TGFBR2, ZFP36L1]	0.0415608
GO:0045892	negative regulation of transcription, DNA-templated	[Group16]	[BRMS1L, CAV1, CTBP2, DDX20, DKK3, FNIP1, FZD1, HIST3H2A, ID1, KLF10, MECP2, NCK1, NCK2, NEDD4, NELFA, NIPBL, NONO, PAXBP1, PEX2, PTGIS, RAMP3, RTF1, SP3, URI1, WWP1, YY1, ZNF639]	0.0417933
GO:0016032	viral process	[Group14]	[CAV1, CAV2, CHMP5, CREBL2, CTSB, EPS15, NEDD4, TBC1D20, USF1, ZNF639]	0.042184
GO:0043620	regulation of DNA-templated transcription in response to stress	[Group5]	[NCK1, NCK2, NEDD4, NFE2L2]	0.0433741
GO:0000266	mitochondrial fission	[Group1]	[DDHD1, GDAP1, MFF]	0.0439142
GO:2000113	negative regulation of cellular macromolecule biosynthetic process	[Group16]	[BRMS1L, CAV1, CTBP2, DDX20, DKK3, FNIP1, FZD1, HIST3H2A, ID1, KLF10, MECP2, METTL14, NCK1, NCK2, NEDD4, NELFA, NIPBL, NONO, PAXBP1, PEX2, PTGIS, RAMP3, RTF1, SP3, TERF1, URI1, WWP1, YY1, ZNF639]	0.044553
GO:0001919	regulation of receptor recycling	[Group7]	[CHMP5, NSF, RAMP3]	0.0447182
GO:0051707	response to other organism	[Group11]	[ABCC9, ABR, B2M, BCL10, CAV1, CD47, CLEC6A, DCLK1, IL33, LYZ, MR1, MRC1, MRPS10, NCK1, OAS1Y, POLR3C, PTAFR, PTGER4, SERINC3, SLC11A1, TLR3, URI1]	0.0449719
GO:0051493	regulation of cytoskeleton organization	[Group10]	[AFAP1, ARFIP1, CD2AP, CFL2, CHMP5, DIXDC1, NCK1, NCK2, NCKAP1, PTGER4, RASA1, SENP6, TERF1, TMOD3]	0.0449827
GO:0002686	negative regulation of leukocyte migration	[Group8]	[ABR, C5AR2, IL33, PTGER4]	0.0450728
GO:0043488	regulation of mRNA stability	[Group4]	[METTL14, SLC11A1, ZC3H14, ZFP36L1, ZFP36L2]	0.0462227
GO:0051172	negative regulation of nitrogen compound metabolic process	[Group16]	[BRMS1L, CAV1, CTBP2, DDX20, DKK3, DYRK1A, FNIP1, FZD1, HIST3H2A, ID1, KLF10, MECP2, METTL14, NCK1, NCK2, NEDD4, NELFA, NIPBL, NONO, PAXBP1, PEX2, PTGIS, RAMP3, RTF1, SP3, TERF1, URI1, WWP1, YY1, ZC3H14, ZNF639]	0.04755
GO:0009611	response to wounding	[Group8]	[ABR, ANXA1, CAV1, CD47, CTSS, F13A1, GJA1, IL33, NFE2L2, PDGFRA, PIK3CA, PTGER4, PTGIS, SLC11A1, TC2N, THBD, TLR3]	0.0478761
GO:0050729	positive regulation of inflammatory response	[Group8]	[CD47, CTSS, IL33, PTGER4, TLR3]	0.0485444
GO:0043647	inositol phosphate metabolic process	[Group6]	[IMPA2, PTAFR, SYNJ1]	0.0489421
GO:0006897	endocytosis	[Group17]	[ABR, ANKFY1, ANXA1, B2M, CALCRL, CAV1, CAV2, CD47, DPYSL2, EPS15, MRC1, NEDD4, RAMP3, SLC11A1, SYNJ1]	0.0495967

## Sheet: darkslateblue
Biological Process (BP)					Molecular Function (MF)					REACTOME pathway
BP GOID	BP GOTerm	BP GO Groups	Associated Genes Found	Term PValue Corrected with Benjamini-Hochberg	MF GOID	MF GOTerm	MF GO Groups	Associated Genes Found	Term PValue Corrected with Benjamini-Hochberg	REACTOME ID	REACTOME Pathway	REACTOME Groups	Associated Genes Found	Term PValue Corrected with Benjamini-Hochberg
GO:0016579	protein deubiquitination	[Group0]	[USP15, USP34, USP37, USP53]	0.000169878	GO:0036459	ubiquitinyl hydrolase activity	[Group0]	[USP15, USP34, USP37, USP53]	0.000125019	-	-	-	-	-
GO:0070646	protein modification by small protein removal	[Group0]	[USP15, USP34, USP37, USP53]	0.000145203	GO:0004197	cysteine-type endopeptidase activity	[Group0]	[USP15, USP34, USP37]	0.000679915
					GO:0004843	ubiquitin-specific protease activity	[Group0]	[USP15, USP34, USP37]	0.000691426
					GO:0008234	cysteine-type peptidase activity	[Group0]	[SENP7, USP15, USP34, USP37]	0.00072116
					GO:0019783	ubiquitin-like protein-specific protease activity	[Group0]	[USP15, USP34, USP37]	0.000802664

## Sheet: florawhite
Biological Process (BP)					Molecular Function (MF)					REACTOME pathway
BP GOID	BP GOTerm	BP GO Groups	Associated Genes Found	Term PValue Corrected with Benjamini-Hochberg	MF GOID	MF GOTerm	MF GO Groups	Associated Genes Found	Term PValue Corrected with Benjamini-Hochberg	REACTOME ID	REACTOME Pathway	REACTOME Groups	Associated Genes Found	Term PValue Corrected with Benjamini-Hochberg
GO:0022904	respiratory electron transport chain	[Group0]	[COQ7, COX8A, NDUFA10, NDUFA7, NDUFC2, SLC25A12, UQCRC1, UQCRC2]	4.44281e-05	GO:0008137	NADH dehydrogenase (ubiquinone) activity	[Group3]	[NDUFA10, NDUFA13, NDUFA7, NDUFB7, NDUFC2, NDUFS3, NDUFS7]	3.83882e-07	-	-	-	-	-
GO:0042773	ATP synthesis coupled electron transport	[Group0]	[COQ7, COX8A, NDUFA10, NDUFA7, NDUFC2, UQCRC1, UQCRC2]	4.73772e-05	GO:0050136	NADH dehydrogenase (quinone) activity	[Group3]	[NDUFA10, NDUFA13, NDUFA7, NDUFB7, NDUFC2, NDUFS3, NDUFS7]	3.83882e-07
GO:0042775	mitochondrial ATP synthesis coupled electron transport	[Group0]	[COQ7, COX8A, NDUFA10, NDUFA7, NDUFC2, UQCRC1, UQCRC2]	5.28855e-05	GO:0016655	oxidoreductase activity, acting on NAD(P)H, quinone or similar compound as acceptor	[Group3]	[NDUFA10, NDUFA13, NDUFA7, NDUFB7, NDUFC2, NDUFS3, NDUFS7]	1.03651e-06
GO:0046034	ATP metabolic process	[Group0]	[ATP5B, ATP5G2, ATP5I, ATP5O, COQ7, COX8A, NDUFA10, NDUFA7, NDUFC2, PFKP, TPI1, UQCRC1, UQCRC2]	6.23627e-05	GO:0003954	NADH dehydrogenase activity	[Group3]	[NDUFA10, NDUFA13, NDUFA7, NDUFB7, NDUFC2, NDUFS3, NDUFS7]	1.07702e-06
GO:0009126	purine nucleoside monophosphate metabolic process	[Group0]	[ATIC, ATP5B, ATP5G2, ATP5I, ATP5O, COQ7, COX8A, NDUFA10, NDUFA7, NDUFC2, PFKP, TPI1, UQCRC1, UQCRC2]	6.34397e-05	GO:0016651	oxidoreductase activity, acting on NAD(P)H	[Group3]	[GSR, NDUFA10, NDUFA13, NDUFA7, NDUFB7, NDUFC2, NDUFS3, NDUFS7]	3.33581e-05
GO:0009167	purine ribonucleoside monophosphate metabolic process	[Group0]	[ATIC, ATP5B, ATP5G2, ATP5I, ATP5O, COQ7, COX8A, NDUFA10, NDUFA7, NDUFC2, PFKP, TPI1, UQCRC1, UQCRC2]	6.34397e-05	GO:0016861	intramolecular oxidoreductase activity, interconverting aldoses and ketoses	[Group1]	[GNPDA1, MPI, TPI1]	0.00371487
GO:0022900	electron transport chain	[Group0]	[COQ7, COX8A, NDUFA10, NDUFA7, NDUFC2, SLC25A12, UQCRC1, UQCRC2]	6.64262e-05	GO:0015078	hydrogen ion transmembrane transporter activity	[Group2]	[ATP5B, ATP5G2, ATP5I, ATP5O, ATP6V1F, COX8A]	0.00379732
GO:0045333	cellular respiration	[Group0]	[COQ7, COX8A, DHTKD1, FH, IDH2, NDUFA10, NDUFA7, NDUFC2, PDHB, SLC25A12, UQCRC1, UQCRC2]	7.82854e-05	GO:0003678	DNA helicase activity	[Group0]	[ERCC2, ERCC3, MCM3, MCM4]	0.00585624
GO:0009205	purine ribonucleoside triphosphate metabolic process	[Group0]	[ATP5B, ATP5G2, ATP5I, ATP5O, COQ7, COX8A, NDUFA10, NDUFA7, NDUFC2, PFKP, TPI1, UQCRC1, UQCRC2]	8.25031e-05	GO:0044769	ATPase activity, coupled to transmembrane movement of ions, rotational mechanism	[Group2]	[ATP5B, ATP5O, ATP6V1F]	0.0169574
GO:0009161	ribonucleoside monophosphate metabolic process	[Group0]	[ATIC, ATP5B, ATP5G2, ATP5I, ATP5O, COQ7, COX8A, NDUFA10, NDUFA7, NDUFC2, PFKP, TPI1, UQCRC1, UQCRC2]	8.59379e-05	GO:0051539	4 iron, 4 sulfur cluster binding	[Group4]	[ERCC2, LIAS, NDUFS7]	0.0477404
GO:0009144	purine nucleoside triphosphate metabolic process	[Group0]	[ATP5B, ATP5G2, ATP5I, ATP5O, COQ7, COX8A, NDUFA10, NDUFA7, NDUFC2, PFKP, TPI1, UQCRC1, UQCRC2]	8.85355e-05
GO:0006091	generation of precursor metabolites and energy	[Group0]	[AKT2, COQ7, COX8A, DHTKD1, FH, GNPDA1, IDH2, NDUFA10, NDUFA7, NDUFC2, PDHB, PFKP, SLC25A12, TPI1, UQCRC1, UQCRC2]	8.91714e-05
GO:0009199	ribonucleoside triphosphate metabolic process	[Group0]	[ATP5B, ATP5G2, ATP5I, ATP5O, COQ7, COX8A, NDUFA10, NDUFA7, NDUFC2, PFKP, TPI1, UQCRC1, UQCRC2]	9.55191e-05
GO:0009123	nucleoside monophosphate metabolic process	[Group0]	[ATIC, ATP5B, ATP5G2, ATP5I, ATP5O, COQ7, COX8A, NDUFA10, NDUFA7, NDUFC2, PFKP, TPI1, UQCRC1, UQCRC2]	0.000101078
GO:0006119	oxidative phosphorylation	[Group0]	[COQ7, COX8A, NDUFA10, NDUFA7, NDUFC2, UQCRC1, UQCRC2]	0.000156648
GO:0015980	energy derivation by oxidation of organic compounds	[Group0]	[AKT2, COQ7, COX8A, DHTKD1, FH, IDH2, NDUFA10, NDUFA7, NDUFC2, PDHB, SLC25A12, UQCRC1, UQCRC2]	0.000165001
GO:0009141	nucleoside triphosphate metabolic process	[Group0]	[ATP5B, ATP5G2, ATP5I, ATP5O, COQ7, COX8A, NDUFA10, NDUFA7, NDUFC2, PFKP, TPI1, UQCRC1, UQCRC2]	0.000192324
GO:0006739	NADP metabolic process	[Group9]	[NADK, PGD, PRDX5, TALDO1, TPI1]	0.000636443
GO:0007059	chromosome segregation	[Group1]	[ANAPC15, ANAPC4, APITD1, CDC23, CDC26, CENPN, DSN1, ERCC2, FAM96A, KATNB1, SGOL2, SMC2]	0.000897501
GO:0033108	mitochondrial respiratory chain complex assembly	[Group6]	[COA3, NDUFAF3, NDUFS5, NDUFS7, TIMM21]	0.00090936
GO:0046128	purine ribonucleoside metabolic process	[Group0]	[ATP5B, ATP5G2, ATP5I, ATP5O, COQ7, COX8A, NDUFA10, NDUFA7, NDUFC2, PFKP, TPI1, UQCRC1, UQCRC2]	0.00108855
GO:0051301	cell division	[Group1]	[ANAPC15, ANAPC4, APITD1, BIRC6, CCND2, CDC23, CDC26, CDK2, CKAP2, DCTN3, DSN1, ERCC2, KATNB1, PIN1, REEP4, TPRA1, TPX2, WASH1]	0.00111612
GO:0042278	purine nucleoside metabolic process	[Group0]	[ATP5B, ATP5G2, ATP5I, ATP5O, COQ7, COX8A, NDUFA10, NDUFA7, NDUFC2, PFKP, TPI1, UQCRC1, UQCRC2]	0.00115776
GO:0010257	NADH dehydrogenase complex assembly	[Group6]	[NDUFAF3, NDUFS5, NDUFS7, TIMM21]	0.00123109
GO:0032981	mitochondrial respiratory chain complex I assembly	[Group6]	[NDUFAF3, NDUFS5, NDUFS7, TIMM21]	0.00123109
GO:0009117	nucleotide metabolic process	[Group0, Group9]	[ATIC, ATP5B, ATP5G2, ATP5I, ATP5O, COQ7, COX8A, NADK, NDUFA10, NDUFA7, NDUFC2, PFKP, PGD, PRDX5, TALDO1, TPI1, UQCRC1, UQCRC2]	0.0013402
GO:0019637	organophosphate metabolic process	[Group0, Group5]	[ATIC, ATP5B, ATP5G2, ATP5I, ATP5O, COQ7, COX8A, DOLK, NADK, NDUFA10, NDUFA7, NDUFC2, PFKP, PGD, PI4KB, PIGC, PIGF, PIGK, PIGO, PRDX5, TALDO1, TPI1, UQCRC1, UQCRC2, WASH1]	0.00134462
GO:0097031	mitochondrial respiratory chain complex I biogenesis	[Group6]	[NDUFAF3, NDUFS5, NDUFS7, TIMM21]	0.00135596
GO:0009060	aerobic respiration	[Group0]	[DHTKD1, FH, IDH2, PDHB, UQCRC1, UQCRC2]	0.0013596
GO:0006733	oxidoreduction coenzyme metabolic process	[Group0, Group9]	[COQ5, COQ7, NADK, PFKP, PGD, PRDX5, TALDO1, TPI1]	0.00138732
GO:0009119	ribonucleoside metabolic process	[Group0]	[ATP5B, ATP5G2, ATP5I, ATP5O, COQ7, COX8A, NDUFA10, NDUFA7, NDUFC2, PFKP, TPI1, UQCRC1, UQCRC2]	0.00142151
GO:0006753	nucleoside phosphate metabolic process	[Group0, Group9]	[ATIC, ATP5B, ATP5G2, ATP5I, ATP5O, COQ7, COX8A, NADK, NDUFA10, NDUFA7, NDUFC2, PFKP, PGD, PRDX5, TALDO1, TPI1, UQCRC1, UQCRC2]	0.00145203
GO:0019693	ribose phosphate metabolic process	[Group0]	[ATIC, ATP5B, ATP5G2, ATP5I, ATP5O, COQ7, COX8A, NDUFA10, NDUFA7, NDUFC2, PFKP, PGD, TALDO1, TPI1, UQCRC1, UQCRC2]	0.00152134
GO:0009116	nucleoside metabolic process	[Group0]	[ATP5B, ATP5G2, ATP5I, ATP5O, COQ7, COX8A, NDUFA10, NDUFA7, NDUFC2, PFKP, TPI1, UQCRC1, UQCRC2]	0.00152666
GO:0015985	energy coupled proton transport, down electrochemical gradient	[Group0, Group5]	[ATP5B, ATP5G2, ATP5I, ATP5O]	0.00155555
GO:0015986	ATP synthesis coupled proton transport	[Group0, Group5]	[ATP5B, ATP5G2, ATP5I, ATP5O]	0.00155555
GO:0055114	oxidation-reduction process	[Group0]	[AKT2, COQ7, COX8A, DHTKD1, FADS3, FH, GSR, IDH2, MCM3, MSRB1, NDUFA10, NDUFA13, NDUFA7, NDUFA8, NDUFB6, NDUFB7, NDUFC2, NDUFS3, NDUFS5, NDUFS7, PDHB, PGD, PRDX2, PRDX5, SLC25A12, UQCRC1, UQCRC2]	0.00159174
GO:0007005	mitochondrion organization	[Group12]	[APOPT1, COA3, COQ7, DNAJC19, GABARAP, MPV17, MRPS26, MRPS34, MTCH2, MTG2, NDUFA7, NDUFAF3, NDUFS5, NDUFS7, PFKP, PSMB7, TIMM17B, TIMM21, USP30]	0.0016135
GO:1901657	glycosyl compound metabolic process	[Group0]	[ATP5B, ATP5G2, ATP5I, ATP5O, COQ7, COX8A, NDUFA10, NDUFA7, NDUFC2, PFKP, TPI1, UQCRC1, UQCRC2]	0.00170054
GO:0009247	glycolipid biosynthetic process	[Group5]	[PIGC, PIGF, PIGK, PIGO, ST3GAL1]	0.00175081
GO:0022402	cell cycle process	[Group1]	[ANAPC15, ANAPC4, APITD1, BABAM1, BIRC6, CCND2, CDC23, CDC26, CDK2, CDKN2C, CENPN, CKAP2, CKAP5, DCTN3, DDB1, ERCC2, ERCC3, KATNB1, MAPKAPK2, PIN1, REEP4, SGOL2, SMC2, TPRA1, TPX2, WASH1]	0.00207782
GO:0032392	DNA geometric change	[Group3]	[ERCC2, ERCC3, HMGB1, MCM3, MCM4]	0.00226707
GO:0006732	coenzyme metabolic process	[Group0, Group9]	[COQ5, COQ7, LIAS, NADK, OXSM, PDHB, PFKP, PGD, PRDX5, TALDO1, TPI1]	0.00246634
GO:0046467	membrane lipid biosynthetic process	[Group5]	[ELOVL1, PIGC, PIGF, PIGK, PIGO, ST3GAL1]	0.00259708
GO:0006098	pentose-phosphate shunt	[Group9]	[PGD, TALDO1, TPI1]	0.00281572
GO:0055086	nucleobase-containing small molecule metabolic process	[Group0, Group9]	[ATIC, ATP5B, ATP5G2, ATP5I, ATP5O, COQ7, COX8A, NADK, NDUFA10, NDUFA7, NDUFC2, PFKP, PGD, PRDX5, TALDO1, TPI1, UQCRC1, UQCRC2]	0.00282293
GO:1901135	carbohydrate derivative metabolic process	[Group0, Group5]	[ALG14, ATIC, ATP5B, ATP5G2, ATP5I, ATP5O, COQ7, COX8A, GNPDA1, MPI, NDUFA10, NDUFA7, NDUFC2, PFKP, PGD, PIGC, PIGF, PIGK, PIGO, PMM1, ST3GAL1, TALDO1, TPI1, UQCRC1, UQCRC2]	0.00338116
GO:1903047	mitotic cell cycle process	[Group1]	[ANAPC15, ANAPC4, APITD1, CDC23, CDC26, CDK2, CDKN2C, CENPN, CKAP2, DCTN3, DDB1, ERCC2, ERCC3, KATNB1, REEP4, SMC2, TPRA1, TPX2]	0.00375926
GO:0006120	mitochondrial electron transport, NADH to ubiquinone	[Group0]	[NDUFA10, NDUFA7, NDUFC2]	0.00378316
GO:0019682	glyceraldehyde-3-phosphate metabolic process	[Group9]	[PGD, TALDO1, TPI1]	0.00378316
GO:0006506	GPI anchor biosynthetic process	[Group5]	[PIGC, PIGF, PIGK, PIGO]	0.00384883
GO:0000280	nuclear division	[Group1]	[ANAPC15, ANAPC4, APITD1, CDC23, CDC26, CDK2, CENPN, DCTN3, KATNB1, REEP4, SGOL2, SMC2, TPX2, WASH1]	0.00471174
GO:0006099	tricarboxylic acid cycle	[Group0]	[DHTKD1, FH, IDH2, PDHB]	0.00508238
GO:0009150	purine ribonucleotide metabolic process	[Group0]	[ATIC, ATP5B, ATP5G2, ATP5I, ATP5O, COQ7, COX8A, NDUFA10, NDUFA7, NDUFC2, PFKP, TPI1, UQCRC1, UQCRC2]	0.00514574
GO:1902600	hydrogen ion transmembrane transport	[Group0, Group5]	[ATP5B, ATP5G2, ATP5I, ATP5O, ATP6V1F, COX8A]	0.00530305
GO:0006163	purine nucleotide metabolic process	[Group0]	[ATIC, ATP5B, ATP5G2, ATP5I, ATP5O, COQ7, COX8A, NDUFA10, NDUFA7, NDUFC2, PFKP, TPI1, UQCRC1, UQCRC2]	0.00539553
GO:0007067	mitotic nuclear division	[Group1]	[ANAPC15, ANAPC4, APITD1, CDC23, CDC26, CDK2, CENPN, DCTN3, KATNB1, REEP4, SMC2, TPX2]	0.00544445
GO:0030150	protein import into mitochondrial matrix	[Group7]	[DNAJC19, TIMM17B, TIMM21]	0.0054977
GO:0006101	citrate metabolic process	[Group0]	[DHTKD1, FH, IDH2, PDHB]	0.00550934
GO:0006505	GPI anchor metabolic process	[Group5]	[PIGC, PIGF, PIGK, PIGO]	0.00550934
GO:0032543	mitochondrial translation	[Group14]	[COA3, MRPS26, MRPS34, MTG2, NDUFA7]	0.00623831
GO:0009259	ribonucleotide metabolic process	[Group0]	[ATIC, ATP5B, ATP5G2, ATP5I, ATP5O, COQ7, COX8A, NDUFA10, NDUFA7, NDUFC2, PFKP, TPI1, UQCRC1, UQCRC2]	0.00627045
GO:0051304	chromosome separation	[Group1]	[ANAPC15, ANAPC4, APITD1, CDC23, CDC26]	0.00667909
GO:0006754	ATP biosynthetic process	[Group0, Group5]	[ATP5B, ATP5G2, ATP5I, ATP5O]	0.00676571
GO:0072350	tricarboxylic acid metabolic process	[Group0]	[DHTKD1, FH, IDH2, PDHB]	0.00676571
GO:0009127	purine nucleoside monophosphate biosynthetic process	[Group0, Group5]	[ATIC, ATP5B, ATP5G2, ATP5I, ATP5O]	0.00713926
GO:0009168	purine ribonucleoside monophosphate biosynthetic process	[Group0, Group5]	[ATIC, ATP5B, ATP5G2, ATP5I, ATP5O]	0.00713926
GO:0000819	sister chromatid segregation	[Group1]	[ANAPC15, ANAPC4, CDC23, CDC26, KATNB1, SGOL2, SMC2]	0.00734966
GO:0006664	glycolipid metabolic process	[Group5]	[PIGC, PIGF, PIGK, PIGO, ST3GAL1]	0.00738089
GO:0032508	DNA duplex unwinding	[Group3]	[ERCC2, ERCC3, MCM3, MCM4]	0.00738705
GO:0048285	organelle fission	[Group1]	[ANAPC15, ANAPC4, APITD1, CDC23, CDC26, CDK2, CENPN, DCTN3, KATNB1, REEP4, SGOL2, SMC2, TPX2, WASH1]	0.00739416
GO:0051186	cofactor metabolic process	[Group0, Group9]	[COQ5, COQ7, LIAS, NADK, OXSM, PDHB, PFKP, PGD, PRDX5, TALDO1, TPI1]	0.00743823
GO:1903509	liposaccharide metabolic process	[Group5]	[PIGC, PIGF, PIGK, PIGO, ST3GAL1]	0.00787241
GO:0072521	purine-containing compound metabolic process	[Group0]	[ATIC, ATP5B, ATP5G2, ATP5I, ATP5O, COQ7, COX8A, NDUFA10, NDUFA7, NDUFC2, PFKP, TPI1, UQCRC1, UQCRC2]	0.00871531
GO:0051156	glucose 6-phosphate metabolic process	[Group9]	[PGD, TALDO1, TPI1]	0.00877062
GO:0098813	nuclear chromosome segregation	[Group1]	[ANAPC15, ANAPC4, APITD1, CDC23, CDC26, KATNB1, SGOL2, SMC2]	0.00883662
GO:0030071	regulation of mitotic metaphase/anaphase transition	[Group1]	[ANAPC15, ANAPC4, CDC23, CDC26]	0.00884932
GO:1902099	regulation of metaphase/anaphase transition of cell cycle	[Group1]	[ANAPC15, ANAPC4, CDC23, CDC26]	0.00884932
GO:0006518	peptide metabolic process	[Group14]	[CLIC1, CNOT1, COA3, DTD1, GSR, MRPL11, MRPL13, MRPL34, MRPL4, MRPL49, MRPS26, MRPS34, MTFMT, MTG2, NARS2, NDUFA7, SEC11A, SLC25A12, SLC25A15, TCEB2]	0.0089323
GO:0019362	pyridine nucleotide metabolic process	[Group0, Group9]	[NADK, PFKP, PGD, PRDX5, TALDO1, TPI1]	0.00894376
GO:0046496	nicotinamide nucleotide metabolic process	[Group0, Group9]	[NADK, PFKP, PGD, PRDX5, TALDO1, TPI1]	0.00894376
GO:0007091	metaphase/anaphase transition of mitotic cell cycle	[Group1]	[ANAPC15, ANAPC4, CDC23, CDC26]	0.00917118
GO:0044784	metaphase/anaphase transition of cell cycle	[Group1]	[ANAPC15, ANAPC4, CDC23, CDC26]	0.00917118
GO:0044772	mitotic cell cycle phase transition	[Group1]	[ANAPC15, ANAPC4, CDC23, CDC26, CDK2, CDKN2C, DDB1, ERCC2, ERCC3, TPRA1]	0.00950191
GO:0042157	lipoprotein metabolic process	[Group5]	[LYPLA1, PIGC, PIGF, PIGK, PIGO, ZDHHC12]	0.00959386
GO:0010965	regulation of mitotic sister chromatid separation	[Group1]	[ANAPC15, ANAPC4, CDC23, CDC26]	0.00990142
GO:0009156	ribonucleoside monophosphate biosynthetic process	[Group0, Group5]	[ATIC, ATP5B, ATP5G2, ATP5I, ATP5O]	0.0104901
GO:0006412	translation	[Group14]	[CNOT1, COA3, DTD1, MRPL11, MRPL13, MRPL34, MRPL4, MRPL49, MRPS26, MRPS34, MTFMT, MTG2, NARS2, NDUFA7, SLC25A12, SLC25A15, TCEB2]	0.0105311
GO:0051306	mitotic sister chromatid separation	[Group1]	[ANAPC15, ANAPC4, CDC23, CDC26]	0.0106605
GO:1901990	regulation of mitotic cell cycle phase transition	[Group1]	[ANAPC15, ANAPC4, CDC23, CDC26, DDB1, ERCC2, ERCC3, TPRA1]	0.010709
GO:0000070	mitotic sister chromatid segregation	[Group1]	[ANAPC15, ANAPC4, CDC23, CDC26, KATNB1, SMC2]	0.0107159
GO:0006261	DNA-dependent DNA replication	[Group3]	[APITD1, CDK2, MCM3, MCM4, RFC2, SLX1A]	0.0107159
GO:0072524	pyridine-containing compound metabolic process	[Group0, Group9]	[NADK, PFKP, PGD, PRDX5, TALDO1, TPI1]	0.0107159
GO:0015992	proton transport	[Group0, Group5]	[ATP5B, ATP5G2, ATP5I, ATP5O, ATP6V1F, COX8A]	0.0112925
GO:0006081	cellular aldehyde metabolic process	[Group9]	[IDH2, PGD, TALDO1, TPI1]	0.01131
GO:0009145	purine nucleoside triphosphate biosynthetic process	[Group0, Group5]	[ATP5B, ATP5G2, ATP5I, ATP5O]	0.01131
GO:0009206	purine ribonucleoside triphosphate biosynthetic process	[Group0, Group5]	[ATP5B, ATP5G2, ATP5I, ATP5O]	0.01131
GO:0033047	regulation of mitotic sister chromatid segregation	[Group1]	[ANAPC15, ANAPC4, CDC23, CDC26]	0.01131
GO:0006818	hydrogen transport	[Group0, Group5]	[ATP5B, ATP5G2, ATP5I, ATP5O, ATP6V1F, COX8A]	0.0117472
GO:0071103	DNA conformation change	[Group3]	[ERCC2, ERCC3, HMGB1, MCM3, MCM4, SMARCA5, SMC2]	0.0119429
GO:0044770	cell cycle phase transition	[Group1]	[ANAPC15, ANAPC4, CDC23, CDC26, CDK2, CDKN2C, DDB1, ERCC2, ERCC3, TPRA1]	0.0120603
GO:0031145	anaphase-promoting complex-dependent proteasomal ubiquitin-dependent protein catabolic process	[Group1]	[ANAPC15, ANAPC4, CDC23, CDC26]	0.0121209
GO:0065002	intracellular protein transmembrane transport	[Group7]	[AKT2, DNAJC19, TIMM17B, TIMM21]	0.0121209
GO:0006497	protein lipidation	[Group5]	[PIGC, PIGF, PIGK, PIGO, ZDHHC12]	0.0125952
GO:0006661	phosphatidylinositol biosynthetic process	[Group5]	[PIGC, PIGF, PIGK, PIGO]	0.0129595
GO:0071806	protein transmembrane transport	[Group7]	[AKT2, DNAJC19, TIMM17B, TIMM21]	0.0129595
GO:0043043	peptide biosynthetic process	[Group14]	[CNOT1, COA3, DTD1, MRPL11, MRPL13, MRPL34, MRPL4, MRPL49, MRPS26, MRPS34, MTFMT, MTG2, NARS2, NDUFA7, SLC25A12, SLC25A15, TCEB2]	0.0131182
GO:0009108	coenzyme biosynthetic process	[Group9]	[COQ5, COQ7, LIAS, NADK, PDHB]	0.0131241
GO:0009124	nucleoside monophosphate biosynthetic process	[Group0, Group5]	[ATIC, ATP5B, ATP5G2, ATP5I, ATP5O]	0.0131241
GO:1901987	regulation of cell cycle phase transition	[Group1]	[ANAPC15, ANAPC4, CDC23, CDC26, DDB1, ERCC2, ERCC3, TPRA1]	0.013147
GO:0000278	mitotic cell cycle	[Group1]	[ANAPC15, ANAPC4, APITD1, CDC23, CDC26, CDK2, CDKN2C, CENPN, CKAP2, DCTN3, DDB1, ERCC2, ERCC3, KATNB1, REEP4, SMC2, TPRA1, TPX2]	0.0132183
GO:0042158	lipoprotein biosynthetic process	[Group5]	[PIGC, PIGF, PIGK, PIGO, ZDHHC12]	0.0136676
GO:0006270	DNA replication initiation	[Group3]	[CDK2, MCM3, MCM4]	0.0145389
GO:0070979	protein K11-linked ubiquitination	[Group1]	[ANAPC4, CDC23, CDC26]	0.0145389
GO:0006643	membrane lipid metabolic process	[Group5]	[ELOVL1, PIGC, PIGF, PIGK, PIGO, ST3GAL1]	0.0147303
GO:0009201	ribonucleoside triphosphate biosynthetic process	[Group0, Group5]	[ATP5B, ATP5G2, ATP5I, ATP5O]	0.015798
GO:0033045	regulation of sister chromatid segregation	[Group1]	[ANAPC15, ANAPC4, CDC23, CDC26]	0.015798
GO:0090407	organophosphate biosynthetic process	[Group0, Group5]	[ATIC, ATP5B, ATP5G2, ATP5I, ATP5O, DOLK, NADK, PIGC, PIGF, PIGK, PIGO, TPI1]	0.0228042
GO:0000413	protein peptidyl-prolyl isomerization	[Group10]	[FKBP15, PIN1, PPIL1]	0.0232656
GO:0015988	energy coupled proton transmembrane transport, against electrochemical gradient	[Group0]	[ATP5B, ATP5G2, ATP6V1F]	0.0257681
GO:0015991	ATP hydrolysis coupled proton transport	[Group0]	[ATP5B, ATP5G2, ATP6V1F]	0.0257681
GO:0009142	nucleoside triphosphate biosynthetic process	[Group0, Group5]	[ATP5B, ATP5G2, ATP5I, ATP5O]	0.0268161
GO:0006383	transcription from RNA polymerase III promoter	[Group8]	[GTF3C2, MAF1, PRDX5]	0.0281158
GO:0031111	negative regulation of microtubule polymerization or depolymerization	[Group13]	[CKAP2, KATNB1, TBCD]	0.0281158
GO:1990542	mitochondrial transmembrane transport	[Group7]	[DNAJC19, TIMM17B, TIMM21]	0.0281158
GO:0051983	regulation of chromosome segregation	[Group1]	[ANAPC15, ANAPC4, CDC23, CDC26]	0.0303393
GO:0090305	nucleic acid phosphodiester bond hydrolysis	[Group4]	[CNOT1, CPSF1, ERCC2, ERCC3, HRSP12, POP7, SLX1A]	0.0311992
GO:0046488	phosphatidylinositol metabolic process	[Group5]	[PI4KB, PIGC, PIGF, PIGK, PIGO]	0.0313507
GO:0065004	protein-DNA complex assembly	[Group2]	[ATF7IP, CENPI, CENPN, HMGB1, SMARCA5]	0.0324325
GO:0090662	ATP hydrolysis coupled transmembrane transport	[Group0]	[ATP5B, ATP5G2, ATP6V1F]	0.0327346
GO:0010564	regulation of cell cycle process	[Group1]	[ANAPC15, ANAPC4, BIRC6, CCND2, CDC23, CDC26, DDB1, ERCC2, ERCC3, PIN1, TPRA1, TPX2]	0.0339219
GO:0006839	mitochondrial transport	[Group7]	[DNAJC19, MCUR1, MTCH2, PSMB7, SLC25A12, TIMM17B, TIMM21]	0.0339646
GO:0051188	cofactor biosynthetic process	[Group9]	[COQ5, COQ7, LIAS, NADK, PDHB]	0.0364306
GO:0000910	cytokinesis	[Group1]	[BIRC6, CCND2, CKAP2, DCTN3, PIN1, WASH1]	0.0401627
GO:0006281	DNA repair	[Group3]	[APITD1, BABAM1, BAZ1B, CDK2, DDB1, ERCC2, ERCC3, HMGB1, SLX1A, SMARCA5]	0.0441678
GO:0044743	intracellular protein transmembrane import	[Group7]	[DNAJC19, TIMM17B, TIMM21]	0.044498
GO:0045132	meiotic chromosome segregation	[Group1]	[APITD1, SGOL2, SMC2]	0.044498
GO:0006979	response to oxidative stress	[Group11]	[COQ7, ERCC2, ERCC3, LIAS, MPV17, MSRB1, PRDX2, PRDX5]	0.0466902
GO:0008654	phospholipid biosynthetic process	[Group5]	[DOLK, PIGC, PIGF, PIGK, PIGO]	0.0483688

## Sheet: green
Biological Process (BP)					Molecular Function (MF)					REACTOME pathway
BP GOID	BP GOTerm	BP GO Groups	Associated Genes Found	Term PValue Corrected with Benjamini-Hochberg	MF GOID	MF GOTerm	MF GO Groups	Associated Genes Found	Term PValue Corrected with Benjamini-Hochberg	REACTOME ID	REACTOME Pathway	REACTOME Groups	Associated Genes Found	Term PValue Corrected with Benjamini-Hochberg
GO:0006396	RNA processing	[Group4, Group7]	[AAR2, AARS, ABT1, ADAR, ADAT1, AGO2, ALKBH5, ALYREF, AQR, BCAS2, BCDIN3D, BOP1, BTG2, BUD31, BYSL, C1D, C1QBP, CASC3, CCNL1, CCNT1, CDC40, CDC5L, CDC73, CDK12, CDK13, CDK5RAP1, CDK9, CHERP, CIRH1A, CLNS1A, CLP1, CPSF2, CPSF4, CPSF6, CRNKL1, CSTF2, CSTF3, CTR9, CTU1, CTU2, CWC15, CWC22, DDX20, DDX23, DDX39B, DDX46, DDX47, DDX5, DDX52, DDX54, DDX56, DGCR8, DHX15, DHX29, DHX30, DHX32, DHX35, DHX36,…	3.64789e-52	GO:0003743	translation initiation factor activity	[Group1]	[AGO2, EIF1, EIF1AD, EIF1B, EIF2AK1, EIF2AK2, EIF2B1, EIF2B2, EIF2B4, EIF2D, EIF2S1, EIF2S3, EIF3A, EIF3B, EIF3D, EIF3F, EIF3G, EIF3H, EIF3J, EIF3K, EIF3L, EIF3M, EIF4A1, EIF4A2, EIF4E, EIF4E2, EIF4G2, EIF4G3, EIF4H, EIF5, EIF5B, EIF6, GTPBP1, GTPBP2]	4.51786e-08	REACTOME:6985597	Gene Expression	[Group2]	[ADAR, AEBP2, AGO2, BCAS2, CASC3, CCAR1, CCNC, CCNH, CCNT1, CD3EAP, CDC40, CDC5L, CDK7, CDK8, CDK9, CLNS1A, CLP1, CNOT10, CNOT11, CNOT3, CNOT6, CNOT6L, COX6A1, CPSF2, CSTF2, CSTF3, CWC15, DCP1A, DDX20, DDX23, DDX6, DGCR8, DHX9, E2F4, E2F5, EDC3, EEF2, EFTUD2, EIF2B1, EIF2B2, EIF2B4, EIF2B5, EIF2S1, EIF2S3, EIF3A, EIF3B, EIF3D, EIF3G, EIF3H, EIF3J, EIF3K, EIF4A1, EIF4A2, EIF4A3, EIF4E, EIF4G1, EIF…	6.08646e-43
GO:0016070	RNA metabolic process	[Group0]	[AAR2, AARS, AATF, ABT1, ACTR8, ACVRL1, ADAM8, ADAR, ADAT1, AEBP2, AGO2, AHR, AKIRIN2, AKT1, ALKBH1, ALKBH5, ALYREF, ANKRA2, ANKRD1, ANKRD49, APEX1, AQR, ARF4, ARID5A, ARID5B, ARMCX3, ARRB1, ASH2L, ASXL1, ASXL2, ATAD2B, ATF1, ATF2, ATF3, ATF4, ATF6B, ATG16L1, ATXN7L3, BAHD1, BAMBI, BASP1, BATF, BCAS2, BCDIN3D, BCL10, BCL2L12, BCL3, BCL6, BCLAF1, BHLHE40, BIRC3, BMPR1B, BMPR2, BOP1, BRCA1, BRD2, B…	1.01148e-45	GO:0003724	RNA helicase activity	[Group3]	[DDX10, DDX19A, DDX19B, DDX20, DDX21, DDX23, DDX24, DDX27, DDX39B, DDX3X, DDX46, DDX47, DDX5, DDX50, DDX51, DDX52, DDX54, DDX55, DDX56, DDX6, DHX15, DHX29, DHX30, DHX32, DHX35, DHX36, DHX37, DHX38, DHX8, DHX9, DQX1, EIF4A1, EIF4A2, EIF4A3, SUPV3L1, UPF1]	3.86301e-07	REACTOME:6985645	Processing of Capped Intron-Containing Pre-mRNA	[Group1, Group6]	[BCAS2, CCAR1, CDC40, CDC5L, CLP1, CPSF2, CSTF2, CSTF3, CWC15, DDX23, DHX9, EFTUD2, FUS, GTF2F1, GTF2F2, HNRNPA0, HNRNPH1, HNRNPH2, HNRNPK, HNRNPL, HNRNPM, HNRNPU, HSPA8, METTL14, METTL3, NCBP2, NUP107, NUP133, NUP155, NUP160, NUP205, NUP214, NUP35, NUP50, NUP85, NUP88, NUP93, NUP98, NUPL2, NXF1, PAPOLA, PCBP1, PDCD7, PHF5A, PLRG1, POLR2A, POLR2B, POLR2C, POLR2D, POLR2F, POLR2I, POLR2K, PRPF4, PR…	7.85422e-18
GO:0016071	mRNA metabolic process	[Group7]	[AAR2, AGO2, ALKBH5, ALYREF, AQR, BCAS2, BTG2, BUD31, C1QBP, CASC3, CCNT1, CCRN4L, CDC40, CDC5L, CDC73, CDK12, CDK13, CDK9, CEBPG, CLNS1A, CLP1, CNOT3, CNOT6, CNOT6L, CPSF2, CPSF4, CPSF6, CRNKL1, CSDE1, CSTF2, CSTF3, CTR9, CWC15, CWC22, DCP1A, DDX20, DDX39B, DDX46, DDX47, DDX5, DHX38, DKC1, DXO, EDC3, EFTUD2, EIF4A3, ETF1, EXOSC10, EXOSC2, EXOSC3, EXOSC5, EXOSC8, GCFC2, GEMIN4, GEMIN6, GEMIN8, GT…	1.76517e-31	GO:0004004	ATP-dependent RNA helicase activity	[Group3]	[DDX10, DDX19A, DDX19B, DDX20, DDX21, DDX23, DDX24, DDX27, DDX39B, DDX3X, DDX46, DDX47, DDX5, DDX50, DDX51, DDX52, DDX54, DDX55, DDX56, DDX6, DHX15, DHX29, DHX30, DHX32, DHX35, DHX36, DHX37, DHX38, DHX8, DHX9, DQX1, EIF4A1, EIF4A2, EIF4A3, SUPV3L1, UPF1]	3.86301e-07	REACTOME:6985657	Eukaryotic Translation Initiation	[Group0]	[EIF2B1, EIF2B2, EIF2B4, EIF2B5, EIF2S1, EIF2S3, EIF3A, EIF3B, EIF3D, EIF3G, EIF3H, EIF3J, EIF3K, EIF4A1, EIF4A2, EIF4E, EIF4G1, EIF4H, EIF5, EIF5B, FAU, PABPC1, RPL11, RPL13, RPL14, RPL15, RPL18, RPL18A, RPL22, RPL23, RPL24, RPL26L1, RPL27, RPL27A, RPL28, RPL29, RPL30, RPL32, RPL4, RPL5, RPL6, RPL7A, RPL8, RPL9, RPLP0, RPLP1, RPS11, RPS12, RPS14, RPS16, RPS17, RPS18, RPS2, RPS20, RPS23, RPS24, R…	4.01922e-15
GO:0006397	mRNA processing	[Group7]	[AAR2, AGO2, ALKBH5, ALYREF, AQR, BCAS2, BTG2, BUD31, C1QBP, CASC3, CCNT1, CDC40, CDC5L, CDC73, CDK12, CDK13, CDK9, CLNS1A, CLP1, CPSF2, CPSF4, CPSF6, CRNKL1, CSTF2, CSTF3, CTR9, CWC15, CWC22, DDX20, DDX39B, DDX46, DDX47, DDX5, DHX38, EFTUD2, EIF4A3, GCFC2, GEMIN4, GEMIN6, GEMIN8, HNRNPK, HNRNPL, HNRNPM, HSPA8, IWS1, JMJD6, LEO1, LOC516355, LSM1, LSM6, LSM7, MAGOHB, METTL14, MTPAP, NCBP2, NSRP1, …	1.69751e-27	GO:0008186	RNA-dependent ATPase activity	[Group3]	[DDX10, DDX19A, DDX19B, DDX20, DDX21, DDX23, DDX24, DDX27, DDX39B, DDX3X, DDX46, DDX47, DDX5, DDX50, DDX51, DDX52, DDX54, DDX55, DDX56, DDX6, DHX15, DHX29, DHX30, DHX32, DHX35, DHX36, DHX37, DHX38, DHX8, DHX9, DQX1, EIF4A1, EIF4A2, EIF4A3, SUPV3L1, UPF1]	3.86301e-07	REACTOME:6985658	Translation	[Group0]	[EEF2, EIF2B1, EIF2B2, EIF2B4, EIF2B5, EIF2S1, EIF2S3, EIF3A, EIF3B, EIF3D, EIF3G, EIF3H, EIF3J, EIF3K, EIF4A1, EIF4A2, EIF4E, EIF4G1, EIF4H, EIF5, EIF5B, FAU, PABPC1, RPL11, RPL13, RPL14, RPL15, RPL18, RPL18A, RPL22, RPL23, RPL24, RPL26L1, RPL27, RPL27A, RPL28, RPL29, RPL30, RPL32, RPL4, RPL5, RPL6, RPL7A, RPL8, RPL9, RPLP0, RPLP1, RPS11, RPS12, RPS14, RPS16, RPS17, RPS18, RPS2, RPS20, RPS23, RP…	5.01587e-15
GO:0034660	ncRNA metabolic process	[Group4, Group7]	[AARS, ABT1, ADAR, ADAT1, AGO2, BCDIN3D, BOP1, BYSL, C1D, CARS, CD3EAP, CDK5RAP1, CIRH1A, CLP1, CTU1, CTU2, DARS, DDX47, DDX52, DDX56, DEDD, DGCR8, DIEXF, DIMT1, DKC1, DUS3L, DUS4L, EIF4A3, ELAC2, ELL, ELL2, ELP3, EMG1, EPRS, EXOSC10, EXOSC2, EXOSC3, EXOSC5, EXOSC8, FARSA, FARSB, FBL, FCF1, FTSJ3, H2AFY, HARS, IARS, IMP3, INTS10, INTS12, INTS3, INTS6, INTS9, KRR1, LARS, LARS2, LRRC47, LSM6, MARS,…	1.07032e-26	GO:0008026	ATP-dependent helicase activity	[Group3]	[DDX10, DDX19A, DDX19B, DDX20, DDX21, DDX23, DDX24, DDX27, DDX39B, DDX3X, DDX46, DDX47, DDX5, DDX50, DDX51, DDX52, DDX54, DDX55, DDX56, DDX6, DHX15, DHX29, DHX30, DHX32, DHX35, DHX36, DHX37, DHX38, DHX8, DHX9, DQX1, EIF4A1, EIF4A2, EIF4A3, ERCC6L2, FBXO18, MCM7, MRE11A, NBN, RECQL, RUVBL1, SUPV3L1, UPF1, WRN, XRCC6]	4.35718e-06	REACTOME:6986552	Nonsense-Mediated Decay (NMD)	[Group0]	[CASC3, EIF4A3, EIF4G1, ETF1, FAU, NCBP2, PABPC1, PPP2CA, PPP2R2A, RBM8A, RNPS1, RPL11, RPL13, RPL14, RPL15, RPL18, RPL18A, RPL22, RPL23, RPL24, RPL26L1, RPL27, RPL27A, RPL28, RPL29, RPL30, RPL32, RPL4, RPL5, RPL6, RPL7A, RPL8, RPL9, RPLP0, RPLP1, RPS11, RPS12, RPS14, RPS16, RPS17, RPS18, RPS2, RPS20, RPS23, RPS24, RPS27A, RPS3, RPS6, RPS7, RPS8, RPS9, RPSA, SMG1, SMG5, SMG7, SMG9, UPF1, UPF3A]	6.83522e-15
GO:0034470	ncRNA processing	[Group4, Group7]	[AARS, ABT1, ADAR, ADAT1, AGO2, BCDIN3D, BOP1, BYSL, C1D, CDK5RAP1, CIRH1A, CLP1, CTU1, CTU2, DDX47, DDX52, DDX56, DGCR8, DIEXF, DIMT1, DKC1, DUS3L, DUS4L, EIF4A3, ELAC2, ELP3, EMG1, EXOSC10, EXOSC2, EXOSC3, EXOSC5, EXOSC8, FBL, FCF1, FTSJ3, IMP3, INTS10, INTS12, INTS3, INTS6, INTS9, KRR1, LSM6, METTL1, METTL16, METTL3, MOCS3, MPHOSPH10, MPHOSPH6, MTO1, NGDN, NHP2, NOB1, NOL11, NOL6, NOL9, NOP14,…	2.51999e-22	GO:0070035	purine NTP-dependent helicase activity	[Group3]	[DDX10, DDX19A, DDX19B, DDX20, DDX21, DDX23, DDX24, DDX27, DDX39B, DDX3X, DDX46, DDX47, DDX5, DDX50, DDX51, DDX52, DDX54, DDX55, DDX56, DDX6, DHX15, DHX29, DHX30, DHX32, DHX35, DHX36, DHX37, DHX38, DHX8, DHX9, DQX1, EIF4A1, EIF4A2, EIF4A3, ERCC6L2, FBXO18, MCM7, MRE11A, NBN, RECQL, RUVBL1, SUPV3L1, UPF1, WRN, XRCC6]	4.35718e-06	REACTOME:6986553	Nonsense Mediated Decay (NMD) enhanced by the Exon Junction Complex (EJC)	[Group0]	[CASC3, EIF4A3, EIF4G1, ETF1, FAU, NCBP2, PABPC1, PPP2CA, PPP2R2A, RBM8A, RNPS1, RPL11, RPL13, RPL14, RPL15, RPL18, RPL18A, RPL22, RPL23, RPL24, RPL26L1, RPL27, RPL27A, RPL28, RPL29, RPL30, RPL32, RPL4, RPL5, RPL6, RPL7A, RPL8, RPL9, RPLP0, RPLP1, RPS11, RPS12, RPS14, RPS16, RPS17, RPS18, RPS2, RPS20, RPS23, RPS24, RPS27A, RPS3, RPS6, RPS7, RPS8, RPS9, RPSA, SMG1, SMG5, SMG7, SMG9, UPF1, UPF3A]	6.83522e-15
GO:0006412	translation	[Group6]	[AARS, ABCF1, ADAR, AGO2, AIMP2, AKT1, BCDIN3D, BCL3, BTG2, C1QBP, CAPRIN1, CARS, CASC3, CNOT3, CNOT6L, CPEB4, DAP3, DAPK3, DARS, DDX3X, DDX6, DGCR8, DNAJC3, EEF2, EFTUD1, EFTUD2, EIF1, EIF1AD, EIF1B, EIF2AK1, EIF2AK2, EIF2AK3, EIF2AK4, EIF2B1, EIF2B2, EIF2B4, EIF2B5, EIF2D, EIF2S1, EIF2S3, EIF3A, EIF3B, EIF3D, EIF3F, EIF3G, EIF3H, EIF3J, EIF3K, EIF3L, EIF3M, EIF4A1, EIF4A2, EIF4A3, EIF4E, EIF4E2…	5.66286e-22	GO:0003729	mRNA binding	[Group0]	[AGO2, C1QBP, CALR, CCRN4L, CPEB4, CPSF6, CSTF2, CSTF3, DCP1A, DDX3X, DHFR, DXO, EDC3, EIF4A3, ELAVL1, FYTTD1, KIAA0020, LOC516355, MECP2, NCBP2, NSRP1, NUDT16, PCBP1, PURB, QKI, RBFOX2, RBM25, RBM38, RBM4, RBM8A, RNF20, RNF40, RNPS1, RPL13A, RPL7, RPS14, RPS2, RPS26, RPS3, SECISBP2, SERBP1, SF3B1, SNRNP70, SNRPC, SRSF1, TARDBP, TPR, TRA2B, TSN, TUT1, UNK, XPO5, YBX3, ZFP36]	7.59013e-05	REACTOME:6985656	Cap-dependent Translation Initiation	[Group0]	[EIF2B1, EIF2B2, EIF2B4, EIF2B5, EIF2S1, EIF2S3, EIF3A, EIF3B, EIF3D, EIF3G, EIF3H, EIF3J, EIF3K, EIF4A1, EIF4A2, EIF4E, EIF4G1, EIF4H, EIF5, EIF5B, FAU, RPL11, RPL13, RPL14, RPL15, RPL18, RPL18A, RPL22, RPL23, RPL24, RPL26L1, RPL27, RPL27A, RPL28, RPL29, RPL30, RPL32, RPL4, RPL5, RPL6, RPL7A, RPL8, RPL9, RPLP0, RPLP1, RPS11, RPS12, RPS14, RPS16, RPS17, RPS18, RPS2, RPS20, RPS23, RPS24, RPS27A, R…	1.03598e-14
GO:0022618	ribonucleoprotein complex assembly	[Group11, Group7]	[AAR2, ABT1, ADAR, AGO2, BRIX1, C1QBP, CCRN4L, CDC40, CLNS1A, CLP1, CNOT6, CNOT6L, CRNKL1, DDX20, DDX39B, DDX3X, DDX6, DHX30, DYNC1H1, EDC3, EFTUD1, EIF2D, EIF2S3, EIF3A, EIF3B, EIF3D, EIF3G, EIF3H, EIF3J, EIF3K, EIF3L, EIF3M, EIF6, FASTKD2, GCFC2, GEMIN4, GEMIN6, GEMIN8, LOC516355, LSM14A, MDN1, MPV17L2, MRPL20, MTERF4, NSUN4, NUFIP1, OGFOD1, PAN2, PATL1, PIH1D1, POLR2D, PPAN, PRMT5, PRMT7, PRPF…	1.17255e-20	GO:0004386	helicase activity	[Group3]	[CCNL1, DDX10, DDX19A, DDX19B, DDX20, DDX21, DDX23, DDX24, DDX27, DDX39B, DDX3X, DDX46, DDX47, DDX5, DDX50, DDX51, DDX52, DDX54, DDX55, DDX56, DDX6, DHX15, DHX29, DHX30, DHX32, DHX35, DHX36, DHX37, DHX38, DHX8, DHX9, DQX1, EIF4A1, EIF4A2, EIF4A3, ERCC6L2, FBXO18, GINS2, GTF2F2, INO80, MCM7, MRE11A, NBN, RECQL, RUVBL1, SMARCA4, SMARCAD1, SMARCAL1, SUPV3L1, UPF1, WRN, XRCC6]	0.000104406	REACTOME:6985655	GTP hydrolysis and joining of the 60S ribosomal subunit	[Group0]	[EIF2S1, EIF2S3, EIF3A, EIF3B, EIF3D, EIF3G, EIF3H, EIF3J, EIF3K, EIF4A1, EIF4A2, EIF4E, EIF4G1, EIF4H, EIF5, EIF5B, FAU, RPL11, RPL13, RPL14, RPL15, RPL18, RPL18A, RPL22, RPL23, RPL24, RPL26L1, RPL27, RPL27A, RPL28, RPL29, RPL30, RPL32, RPL4, RPL5, RPL6, RPL7A, RPL8, RPL9, RPLP0, RPLP1, RPS11, RPS12, RPS14, RPS16, RPS17, RPS18, RPS2, RPS20, RPS23, RPS24, RPS27A, RPS3, RPS6, RPS7, RPS8, RPS9, RPS…	5.95847e-14
GO:0043043	peptide biosynthetic process	[Group6]	[AARS, ABCF1, ADAR, AGO2, AIMP2, AKT1, BCDIN3D, BCL3, BTG2, C1QBP, CAPRIN1, CARS, CASC3, CNOT3, CNOT6L, CPEB4, DAP3, DAPK3, DARS, DDX3X, DDX6, DGCR8, DNAJC3, EEF2, EFTUD1, EFTUD2, EIF1, EIF1AD, EIF1B, EIF2AK1, EIF2AK2, EIF2AK3, EIF2AK4, EIF2B1, EIF2B2, EIF2B4, EIF2B5, EIF2D, EIF2S1, EIF2S3, EIF3A, EIF3B, EIF3D, EIF3F, EIF3G, EIF3H, EIF3J, EIF3K, EIF3L, EIF3M, EIF4A1, EIF4A2, EIF4A3, EIF4E, EIF4E2…	8.26261e-20	GO:0034212	peptide N-acetyltransferase activity	[Group2]	[ATF2, CSRP2BP, ELP3, EPC1, HAT1, ING3, KANSL2, KAT2A, KAT5, KAT6A, KAT8, MCRS1, NAA15, NAA20, NAA25, NAA30, NAA50, NAA60, OGT, PHF20, TADA2A, TEX30]	0.0275089	REACTOME:6985928	L13a-mediated translational silencing of Ceruloplasmin expression	[Group0]	[EIF2S1, EIF2S3, EIF3A, EIF3B, EIF3D, EIF3G, EIF3H, EIF3J, EIF3K, EIF4A1, EIF4A2, EIF4E, EIF4G1, EIF4H, FAU, PABPC1, RPL11, RPL13, RPL14, RPL15, RPL18, RPL18A, RPL22, RPL23, RPL24, RPL26L1, RPL27, RPL27A, RPL28, RPL29, RPL30, RPL32, RPL4, RPL5, RPL6, RPL7A, RPL8, RPL9, RPLP0, RPLP1, RPS11, RPS12, RPS14, RPS16, RPS17, RPS18, RPS2, RPS20, RPS23, RPS24, RPS27A, RPS3, RPS6, RPS7, RPS8, RPS9, RPSA]	1.54557e-13
GO:0008380	RNA splicing	[Group7]	[AAR2, ALYREF, AQR, BCAS2, BUD31, C1QBP, CASC3, CDC40, CDC5L, CDK12, CDK13, CLNS1A, CLP1, CRNKL1, CWC15, CWC22, DDX20, DDX23, DDX39B, DDX46, DDX47, DDX5, DHX38, EFTUD2, EIF4A3, GCFC2, GEMIN4, GEMIN6, GEMIN8, HNRNPH1, HNRNPK, HNRNPM, HSPA8, JMJD6, LOC516355, LSM1, LSM6, LSM7, MAGOHB, METTL14, NCBP2, NSRP1, PABPC1, PHF5A, PIK3R1, PLRG1, PPIH, PPP1R8, PRMT5, PRMT7, PRPF18, PRPF3, PRPF39, PRPF4, PRPF…	5.31189e-19						REACTOME:6985646	mRNA Splicing - Major Pathway	[Group6]	[BCAS2, CCAR1, CDC40, CDC5L, CLP1, CPSF2, CSTF2, CSTF3, CWC15, DDX23, DHX9, EFTUD2, FUS, GTF2F1, GTF2F2, HNRNPA0, HNRNPH1, HNRNPH2, HNRNPK, HNRNPL, HNRNPM, HNRNPU, HSPA8, NCBP2, PAPOLA, PCBP1, PHF5A, PLRG1, POLR2A, POLR2B, POLR2C, POLR2D, POLR2F, POLR2I, POLR2K, PRPF4, PRPF6, PTBP1, RBM8A, RNPS1, SF3A1, SF3A2, SF3A3, SF3B1, SF3B3, SF3B4, SF3B5, SF3B6, SNRNP40, SNRNP70, SNRPB2, SNRPD2, SNRPD3, SNR…	1.90607e-13
GO:0006364	rRNA processing	[Group4]	[ABT1, BOP1, BYSL, C1D, CIRH1A, DDX47, DDX52, DDX56, DIEXF, DIMT1, DKC1, EIF4A3, EMG1, EXOSC10, EXOSC2, EXOSC3, EXOSC5, EXOSC8, FBL, FCF1, FTSJ3, IMP3, KRR1, LSM6, METTL16, MPHOSPH10, MPHOSPH6, NGDN, NHP2, NOB1, NOL11, NOL6, NOL9, NOP14, NOP2, NOP56, NSUN4, NUDT16, PDCD11, PES1, PIN4, POP4, PWP2, RPF2, RPL11, RPL14, RPL7, RPL7L1, RPS14, RPS16, RPS19, RPS21, RPS24, RPS6, RPS7, RPS8, RPSA, RRP1, RR…	6.66036e-18						REACTOME:6985647	mRNA Splicing	[Group6]	[BCAS2, CCAR1, CDC40, CDC5L, CLP1, CPSF2, CSTF2, CSTF3, CWC15, DDX23, DHX9, EFTUD2, FUS, GTF2F1, GTF2F2, HNRNPA0, HNRNPH1, HNRNPH2, HNRNPK, HNRNPL, HNRNPM, HNRNPU, HSPA8, NCBP2, PAPOLA, PCBP1, PDCD7, PHF5A, PLRG1, POLR2A, POLR2B, POLR2C, POLR2D, POLR2F, POLR2I, POLR2K, PRPF4, PRPF6, PTBP1, RBM8A, RNPC3, RNPS1, SF3A1, SF3A2, SF3A3, SF3B1, SF3B3, SF3B4, SF3B5, SF3B6, SNRNP40, SNRNP48, SNRNP70, SNRP…	4.46273e-13
GO:0016072	rRNA metabolic process	[Group4]	[ABT1, BOP1, BYSL, C1D, CIRH1A, DDX47, DDX52, DDX56, DIEXF, DIMT1, DKC1, EIF4A3, EMG1, EXOSC10, EXOSC2, EXOSC3, EXOSC5, EXOSC8, FBL, FCF1, FTSJ3, IMP3, KRR1, LSM6, METTL16, MPHOSPH10, MPHOSPH6, NGDN, NHP2, NOB1, NOL11, NOL6, NOL9, NOP14, NOP2, NOP56, NSUN4, NUDT16, PDCD11, PES1, PIN4, POP4, PWP2, RPF2, RPL11, RPL14, RPL7, RPL7L1, RPS14, RPS16, RPS19, RPS21, RPS24, RPS6, RPS7, RPS8, RPSA, RRP1, RR…	6.66036e-18						REACTOME:6985659	Metabolism of proteins	[Group0]	[ABCA3, ADAMTSL4, ADORA2B, ALG1, ALG12, ALG2, ALG3, ALG5, ATP6AP2, B4GALT1, B4GALT4, BRCA1, C1GALT1, C1GALT1C1, CALR, CANX, CCDC59, CCT2, CCT3, CCT4, CCT5, CCT7, CCT8, CKAP4, CTSC, CTSH, DERL2, DHDDS, DPAGT1, DPH2, DPH3, DPH5, DPM1, DPM3, EDEM3, EEF2, EIF2AK3, EIF2B1, EIF2B2, EIF2B4, EIF2B5, EIF2S1, EIF2S3, EIF3A, EIF3B, EIF3D, EIF3G, EIF3H, EIF3J, EIF3K, EIF4A1, EIF4A2, EIF4E, EIF4G1, EIF4H, EIF…	3.41288e-12
GO:0000375	RNA splicing, via transesterification reactions	[Group7]	[AAR2, AQR, BCAS2, BUD31, C1QBP, CDC40, CDC5L, CDK13, CLNS1A, CRNKL1, CWC15, CWC22, DDX20, DDX23, DDX39B, DDX46, DDX5, DHX38, EFTUD2, EIF4A3, GCFC2, GEMIN4, GEMIN6, GEMIN8, HNRNPM, HSPA8, JMJD6, LOC516355, LSM6, LSM7, METTL14, NCBP2, NSRP1, PHF5A, PLRG1, PRMT5, PRMT7, PRPF18, PRPF3, PRPF39, PRPF4, PRPF40A, PRPF6, PSPC1, PTBP1, RBFOX2, RBM17, RBM22, RBM25, RBM4, RBM42, RBM8A, RBMX2, RNF219, RNPC3,…	6.00193e-16						REACTOME:6986551	Nonsense Mediated Decay (NMD) independent of the Exon Junction Complex (EJC)	[Group0]	[EIF4G1, ETF1, FAU, NCBP2, PABPC1, RPL11, RPL13, RPL14, RPL15, RPL18, RPL18A, RPL22, RPL23, RPL24, RPL26L1, RPL27, RPL27A, RPL28, RPL29, RPL30, RPL32, RPL4, RPL5, RPL6, RPL7A, RPL8, RPL9, RPLP0, RPLP1, RPS11, RPS12, RPS14, RPS16, RPS17, RPS18, RPS2, RPS20, RPS23, RPS24, RPS27A, RPS3, RPS6, RPS7, RPS8, RPS9, RPSA, UPF1]	1.12607e-11
GO:0000377	RNA splicing, via transesterification reactions with bulged adenosine as nucleophile	[Group7]	[AAR2, AQR, BCAS2, BUD31, C1QBP, CDC40, CDC5L, CDK13, CLNS1A, CRNKL1, CWC15, CWC22, DDX20, DDX39B, DDX46, DDX5, DHX38, EFTUD2, EIF4A3, GCFC2, GEMIN4, GEMIN6, GEMIN8, HNRNPM, HSPA8, JMJD6, LOC516355, LSM6, LSM7, METTL14, NCBP2, NSRP1, PHF5A, PLRG1, PRMT5, PRMT7, PRPF18, PRPF3, PRPF39, PRPF4, PRPF40A, PRPF6, PSPC1, PTBP1, RBFOX2, RBM17, RBM22, RBM25, RBM4, RBM42, RBM8A, RBMX2, RNF219, RNPC3, RNPS1,…	1.34798e-15						REACTOME:6985664	Formation of a pool of free 40S subunits	[Group0]	[EIF3A, EIF3B, EIF3D, EIF3G, EIF3H, EIF3J, EIF3K, FAU, RPL11, RPL13, RPL14, RPL15, RPL18, RPL18A, RPL22, RPL23, RPL24, RPL26L1, RPL27, RPL27A, RPL28, RPL29, RPL30, RPL32, RPL4, RPL5, RPL6, RPL7A, RPL8, RPL9, RPLP0, RPLP1, RPS11, RPS12, RPS14, RPS16, RPS17, RPS18, RPS2, RPS20, RPS23, RPS24, RPS27A, RPS3, RPS6, RPS7, RPS8, RPS9, RPSA]	3.88757e-11
GO:0000398	mRNA splicing, via spliceosome	[Group7]	[AAR2, AQR, BCAS2, BUD31, C1QBP, CDC40, CDC5L, CDK13, CLNS1A, CRNKL1, CWC15, CWC22, DDX20, DDX39B, DDX46, DDX5, DHX38, EFTUD2, EIF4A3, GCFC2, GEMIN4, GEMIN6, GEMIN8, HNRNPM, HSPA8, JMJD6, LOC516355, LSM6, LSM7, METTL14, NCBP2, NSRP1, PHF5A, PLRG1, PRMT5, PRMT7, PRPF18, PRPF3, PRPF39, PRPF4, PRPF40A, PRPF6, PSPC1, PTBP1, RBFOX2, RBM17, RBM22, RBM25, RBM4, RBM42, RBM8A, RBMX2, RNF219, RNPC3, RNPS1,…	1.34798e-15						REACTOME:6986689	SRP-dependent cotranslational protein targeting to membrane	[Group0]	[FAU, RPL11, RPL13, RPL14, RPL15, RPL18, RPL18A, RPL22, RPL23, RPL24, RPL26L1, RPL27, RPL27A, RPL28, RPL29, RPL30, RPL32, RPL4, RPL5, RPL6, RPL7A, RPL8, RPL9, RPLP0, RPLP1, RPS11, RPS12, RPS14, RPS16, RPS17, RPS18, RPS2, RPS20, RPS23, RPS24, RPS27A, RPS3, RPS6, RPS7, RPS8, RPS9, RPSA, SRP14, SRP19, SRP68, SRP9]	8.61993e-11
GO:2000112	regulation of cellular macromolecule biosynthetic process	[Group0]	[AARS, AATF, ABCF1, ABT1, ACTR8, ACVRL1, ADAM8, ADAR, AEBP2, AGO2, AHR, AKIRIN2, AKT1, ANKRA2, ANKRD1, ANKRD17, ANKRD49, APEX1, ARF4, ARID5A, ARID5B, ARMCX3, ARRB1, ASH2L, ASXL1, ASXL2, ATAD2B, ATF1, ATF2, ATF3, ATF4, ATF6B, ATXN7L3, BAHD1, BAMBI, BASP1, BATF, BCDIN3D, BCL10, BCL2L12, BCL3, BCL6, BCLAF1, BHLHE40, BMPR1B, BMPR2, BRCA1, BRD2, BRMS1, BRWD1, BRWD3, BTG2, BUD31, C1D, C1QBP, CALR, CAPR…	1.92116e-11						REACTOME:6986035	Cytokine Signaling in Immune system	[Group3]	[BIRC3, BRAP, CD40, CHUK, CRK, CSF2RB, CUL1, CUL3, DUSP7, EGFR, EIF4A1, EIF4A2, EIF4A3, EIF4E, EIF4E2, EIF4G1, EIF4G2, EIF4G3, FGF2, FLNB, FRS2, GHR, GRB2, IFNAR1, IFNAR2, IKBKB, IL1A, IL1B, IL1R1, IL1R2, IL1RN, IL2RA, IL2RG, IL6ST, INPP5D, IRAK1, IRAK4, IRF9, ISG15, JAK1, JAK3, KIT, KITLG, LAMTOR3, LOC100336606, LTBR, LYN, MAP2K1, MAP2K2, MAP3K14, MAP3K8, MAPK1, MAPK3, MYD88, NFKB1, NFKB2, NRG1,…	1.85713e-08
GO:0051252	regulation of RNA metabolic process	[Group0]	[AATF, ABT1, ACTR8, ACVRL1, ADAM8, AEBP2, AGO2, AHR, AKIRIN2, AKT1, ANKRA2, ANKRD1, ANKRD49, APEX1, ARF4, ARID5A, ARID5B, ARMCX3, ARRB1, ASH2L, ASXL1, ASXL2, ATAD2B, ATF1, ATF2, ATF3, ATF4, ATF6B, ATXN7L3, BAHD1, BAMBI, BASP1, BATF, BCDIN3D, BCL10, BCL2L12, BCL3, BCL6, BCLAF1, BHLHE40, BIRC3, BMPR1B, BMPR2, BRCA1, BRD2, BRMS1, BRWD1, BRWD3, BTG2, BUD31, C1D, C1QBP, CALR, CASK, CCAR1, CCDC59, CCDC…	5.62182e-10						REACTOME:6985660	Ribosomal scanning and start codon recognition	[Group0]	[EIF2S1, EIF2S3, EIF3A, EIF3B, EIF3D, EIF3G, EIF3H, EIF3J, EIF3K, EIF4A1, EIF4A2, EIF4E, EIF4G1, EIF4H, EIF5, FAU, RPS11, RPS12, RPS14, RPS16, RPS17, RPS18, RPS2, RPS20, RPS23, RPS24, RPS27A, RPS3, RPS6, RPS7, RPS8, RPS9, RPSA]	1.09968e-07
GO:0006413	translational initiation	[Group6]	[ABCF1, AGO2, DDX3X, DNAJC3, EIF1, EIF1AD, EIF1B, EIF2AK1, EIF2AK2, EIF2AK3, EIF2AK4, EIF2B1, EIF2B2, EIF2B4, EIF2B5, EIF2D, EIF2S1, EIF2S3, EIF3A, EIF3B, EIF3D, EIF3F, EIF3G, EIF3H, EIF3J, EIF3K, EIF3L, EIF3M, EIF4A1, EIF4A2, EIF4E, EIF4E2, EIF4G1, EIF4G2, EIF4G3, EIF4H, EIF5, EIF5B, EIF6, GTPBP1, GTPBP2, IMPACT, NCBP2, NCK2, NPM1, POLR2D, PPP1R15A, PPP1R15B, RBM4, RPL13A, RPS6KB1, TNF, TPR, YTH…	1.97873e-09						REACTOME:6985937	Translation initiation complex formation	[Group0]	[EIF2S1, EIF2S3, EIF3A, EIF3B, EIF3D, EIF3G, EIF3H, EIF3J, EIF3K, EIF4A1, EIF4A2, EIF4E, EIF4G1, EIF4H, FAU, RPS11, RPS12, RPS14, RPS16, RPS17, RPS18, RPS2, RPS20, RPS23, RPS24, RPS27A, RPS3, RPS6, RPS7, RPS8, RPS9, RPSA]	2.87213e-07
GO:0006417	regulation of translation	[Group6]	[AARS, ABCF1, ADAR, AGO2, AKT1, BCDIN3D, BCL3, BTG2, C1QBP, CAPRIN1, CASC3, CNOT3, CNOT6L, CPEB4, DAPK3, DDX3X, DDX6, DGCR8, DNAJC3, EEF2, EIF1, EIF2AK1, EIF2AK2, EIF2AK3, EIF2AK4, EIF2B1, EIF2B2, EIF2B4, EIF2S1, EIF3A, EIF3B, EIF3D, EIF3G, EIF3J, EIF3K, EIF3L, EIF3M, EIF4A1, EIF4A2, EIF4A3, EIF4E, EIF4E2, EIF4G1, EIF4G2, EIF5, ELAVL1, EPRS, ETF1, FAM129A, GIGYF2, GNB2L1, IARS, ILF3, IMP3, IMPACT…	3.24017e-09						REACTOME:6985661	Activation of the mRNA upon binding of the cap-binding complex and eIFs, and subsequent binding to 43S	[Group0]	[EIF2S1, EIF2S3, EIF3A, EIF3B, EIF3D, EIF3G, EIF3H, EIF3J, EIF3K, EIF4A1, EIF4A2, EIF4E, EIF4G1, EIF4H, FAU, RPS11, RPS12, RPS14, RPS16, RPS17, RPS18, RPS2, RPS20, RPS23, RPS24, RPS27A, RPS3, RPS6, RPS7, RPS8, RPS9, RPSA]	8.01714e-07
GO:0010608	posttranscriptional regulation of gene expression	[Group6]	[AARS, ABCF1, ADAR, AGO2, AKT1, APEX1, BCDIN3D, BCL3, BTG2, C1QBP, CAPRIN1, CASC3, CCRN4L, CLP1, CNOT3, CNOT6L, CPEB4, DAPK3, DDX3X, DDX6, DGCR8, DHX9, DNAJC3, DXO, EEF2, EIF1, EIF2AK1, EIF2AK2, EIF2AK3, EIF2AK4, EIF2B1, EIF2B2, EIF2B4, EIF2S1, EIF3A, EIF3B, EIF3D, EIF3G, EIF3J, EIF3K, EIF3L, EIF3M, EIF4A1, EIF4A2, EIF4A3, EIF4E, EIF4E2, EIF4G1, EIF4G2, EIF5, ELAVL1, EPRS, ETF1, FAM129A, GIGYF2, …	4.41302e-09						REACTOME:6986142	snRNP Assembly	[Group1]	[CLNS1A, DDX20, GEMIN4, GEMIN6, NCBP2, NUP107, NUP133, NUP155, NUP160, NUP205, NUP214, NUP35, NUP50, NUP85, NUP88, NUP93, NUP98, NUPL2, PHAX, PRMT5, RANBP2, SEH1L, SMN2, SNRPD2, SNRPD3, SNRPF, SNRPG, TGS1, TPR, WDR77]	1.91438e-06
GO:0009451	RNA modification	[Group4]	[AARS, ADAR, ALKBH5, BCDIN3D, CDK5RAP1, CTU1, CTU2, DIMT1, DKC1, DUS3L, DUS4L, ELP3, EMG1, FBL, FTSJ3, GAR1, KIAA1429, METTL1, METTL14, METTL16, METTL3, MOCS3, MTO1, NOP10, NOP56, NSUN4, NUDT16, OSGEP, OSGEPL1, PUS1, PUS7, PUS7L, QTRT1, RNMT, RNMTL1, RPUSD2, RPUSD3, TFB1M, TFB2M, TGS1, THG1L, TRIT1, TRMT1, TRMT112, TRMT2A, TRMT6, TRMT61A, WTAP]	1.13609e-08						REACTOME:6986143	Metabolism of non-coding RNA	[Group1]	[CLNS1A, DDX20, GEMIN4, GEMIN6, NCBP2, NUP107, NUP133, NUP155, NUP160, NUP205, NUP214, NUP35, NUP50, NUP85, NUP88, NUP93, NUP98, NUPL2, PHAX, PRMT5, RANBP2, SEH1L, SMN2, SNRPD2, SNRPD3, SNRPF, SNRPG, TGS1, TPR, WDR77]	1.91438e-06
GO:0032774	RNA biosynthetic process	[Group0]	[AATF, ABT1, ACTR8, ACVRL1, ADAM8, AEBP2, AGO2, AHR, AKIRIN2, AKT1, ANKRA2, ANKRD1, ANKRD49, APEX1, ARF4, ARID5A, ARID5B, ARMCX3, ARRB1, ASH2L, ASXL1, ASXL2, ATAD2B, ATF1, ATF2, ATF3, ATF4, ATF6B, ATG16L1, ATXN7L3, BAHD1, BAMBI, BASP1, BATF, BCL10, BCL2L12, BCL3, BCL6, BCLAF1, BHLHE40, BIRC3, BMPR1B, BMPR2, BRCA1, BRD2, BRMS1, BRWD1, BRWD3, BUD31, C1D, C1QBP, CALR, CASK, CCAR1, CCDC59, CCDC85B, C…	1.34332e-08						REACTOME:6985662	Formation of the ternary complex, and subsequently, the 43S complex	[Group0]	[EIF2S1, EIF2S3, EIF3A, EIF3B, EIF3D, EIF3G, EIF3H, EIF3J, EIF3K, FAU, RPS11, RPS12, RPS14, RPS16, RPS17, RPS18, RPS2, RPS20, RPS23, RPS24, RPS27A, RPS3, RPS6, RPS7, RPS8, RPS9, RPSA]	1.17046e-05
GO:0006351	transcription, DNA-templated	[Group0]	[AATF, ABT1, ACTR8, ACVRL1, ADAM8, AEBP2, AGO2, AHR, AKIRIN2, AKT1, ANKRA2, ANKRD1, ANKRD49, APEX1, ARF4, ARID5A, ARID5B, ARMCX3, ARRB1, ASH2L, ASXL1, ASXL2, ATAD2B, ATF1, ATF2, ATF3, ATF4, ATF6B, ATXN7L3, BAHD1, BAMBI, BASP1, BATF, BCL10, BCL2L12, BCL3, BCL6, BCLAF1, BHLHE40, BMPR1B, BMPR2, BRCA1, BRD2, BRMS1, BRWD1, BRWD3, BUD31, C1D, C1QBP, CALR, CASK, CCAR1, CCDC59, CCDC85B, CCL3, CCNC, CCNH,…	1.37895e-08						REACTOME:6985653	RNA Polymerase II Transcription	[Group6]	[CCNH, CCNT1, CDC40, CDK7, CDK9, CLP1, CPSF2, CSTF2, CSTF3, ELL, GTF2A1, GTF2A2, GTF2E1, GTF2F1, GTF2F2, GTF2H1, NCBP2, PAPOLA, POLR2A, POLR2B, POLR2C, POLR2D, POLR2F, POLR2I, POLR2K, RBM8A, RNMT, RNPS1, SNRPD3, SNRPF, SNRPG, SRSF1, SRSF3, SRSF6, SRSF7, SUPT5H, TAF11, TAF12, TAF2, TAF3, TAF9, TCEA1, TCEB1, TCEB3, U2AF1]	2.10227e-05
GO:0097659	nucleic acid-templated transcription	[Group0]	[AATF, ABT1, ACTR8, ACVRL1, ADAM8, AEBP2, AGO2, AHR, AKIRIN2, AKT1, ANKRA2, ANKRD1, ANKRD49, APEX1, ARF4, ARID5A, ARID5B, ARMCX3, ARRB1, ASH2L, ASXL1, ASXL2, ATAD2B, ATF1, ATF2, ATF3, ATF4, ATF6B, ATXN7L3, BAHD1, BAMBI, BASP1, BATF, BCL10, BCL2L12, BCL3, BCL6, BCLAF1, BHLHE40, BIRC3, BMPR1B, BMPR2, BRCA1, BRD2, BRMS1, BRWD1, BRWD3, BUD31, C1D, C1QBP, CALR, CASK, CCAR1, CCDC59, CCDC85B, CCL3, CCNC…	1.77528e-08						REACTOME:6985714	mRNA Splicing - Minor Pathway	[Group6]	[DDX23, EFTUD2, GTF2F1, GTF2F2, NCBP2, PDCD7, POLR2A, POLR2B, POLR2C, POLR2D, POLR2F, POLR2I, POLR2K, PRPF6, RNPC3, SF3B1, SF3B3, SF3B4, SF3B5, SF3B6, SNRNP40, SNRNP48, SNRPD2, SNRPD3, SNRPF, SNRPG, SNU13, SRSF1, SRSF6, SRSF7, YBX1]	2.88554e-05
GO:0006399	tRNA metabolic process	[Group4]	[AARS, ADAT1, CARS, CDK5RAP1, CLP1, CTU1, CTU2, DARS, DUS3L, DUS4L, ELAC2, ELP3, EPRS, EXOSC2, EXOSC3, EXOSC8, FARSA, FARSB, FBL, HARS, IARS, LARS, LARS2, LRRC47, MARS, MARS2, METTL1, MOCS3, MTO1, NARS, OSGEP, OSGEPL1, POP1, POP4, POP5, PUS1, PUS7, QARS, QRSL1, QTRT1, RARS, RPP14, RPUSD2, RPUSD3, SARS, TARS, TARS2, THG1L, TRIT1, TRMT1, TRMT10C, TRMT112, TRMT12, TRMT6, TRMT61A, TRNT1, TSEN2, TSEN3…	6.91906e-08						REACTOME:6986011	Toll Like Receptor 9 (TLR9) Cascade	[Group4]	[ATF1, ATF2, CHUK, CREB1, CUL1, DHX36, DHX9, DUSP3, DUSP7, FOS, IKBKB, IRAK1, IRAK4, IRF7, JUN, MAP2K3, MAP2K4, MAP3K8, MAPK1, MAPK14, MAPK3, MYD88, NFKB1, NFKB2, NFKBIB, PELI1, PIK3R4, PPP2CA, RELA, RIPK2, RPS27A, RPS6KA3, S100A12, TAB2, TLR7, TRAF6, UBC, UBE2N]	5.84561e-05
GO:0006446	regulation of translational initiation	[Group6]	[AGO2, DDX3X, DNAJC3, EIF1, EIF2AK1, EIF2AK3, EIF2AK4, EIF2B1, EIF2B2, EIF2B4, EIF2S1, EIF3A, EIF3B, EIF3D, EIF3G, EIF3J, EIF3K, EIF3L, EIF3M, EIF4A1, EIF4A2, EIF4G1, EIF4G2, EIF5, IMPACT, NCBP2, NCK2, NPM1, POLR2D, PPP1R15A, PPP1R15B, RBM4, RPL13A, RPS6KB1, TNF, TPR, YTHDF1]	3.10495e-07						REACTOME:6986010	MyD88 dependent cascade initiated on endosome	[Group4]	[ATF1, ATF2, CHUK, CREB1, CUL1, DHX36, DHX9, DUSP3, DUSP7, FOS, IKBKB, IRAK1, IRAK4, IRF7, JUN, MAP2K3, MAP2K4, MAP3K8, MAPK1, MAPK14, MAPK3, MYD88, NFKB1, NFKB2, NFKBIB, PELI1, PPP2CA, RELA, RIPK2, RPS27A, RPS6KA3, S100A12, TAB2, TLR7, TRAF6, UBC, UBE2N]	6.66438e-05
GO:2001141	regulation of RNA biosynthetic process	[Group0]	[AATF, ABT1, ACTR8, ACVRL1, ADAM8, AEBP2, AGO2, AHR, AKIRIN2, AKT1, ANKRA2, ANKRD1, ANKRD49, APEX1, ARF4, ARID5A, ARID5B, ARMCX3, ARRB1, ASH2L, ASXL1, ASXL2, ATAD2B, ATF1, ATF2, ATF3, ATF4, ATF6B, ATXN7L3, BAHD1, BAMBI, BASP1, BATF, BCL10, BCL2L12, BCL3, BCL6, BCLAF1, BHLHE40, BIRC3, BMPR1B, BMPR2, BRCA1, BRD2, BRMS1, BRWD1, BRWD3, BUD31, C1D, C1QBP, CALR, CASK, CCAR1, CCDC59, CCDC85B, CCL3, CCL4…	3.31295e-07						REACTOME:6986012	Toll Like Receptor 7/8 (TLR7/8) Cascade	[Group4]	[ATF1, ATF2, CHUK, CREB1, CUL1, DHX36, DHX9, DUSP3, DUSP7, FOS, IKBKB, IRAK1, IRAK4, IRF7, JUN, MAP2K3, MAP2K4, MAP3K8, MAPK1, MAPK14, MAPK3, MYD88, NFKB1, NFKB2, NFKBIB, PELI1, PPP2CA, RELA, RIPK2, RPS27A, RPS6KA3, S100A12, TAB2, TLR7, TRAF6, UBC, UBE2N]	6.66438e-05
GO:1903506	regulation of nucleic acid-templated transcription	[Group0]	[AATF, ABT1, ACTR8, ACVRL1, ADAM8, AEBP2, AGO2, AHR, AKIRIN2, AKT1, ANKRA2, ANKRD1, ANKRD49, APEX1, ARF4, ARID5A, ARID5B, ARMCX3, ARRB1, ASH2L, ASXL1, ASXL2, ATAD2B, ATF1, ATF2, ATF3, ATF4, ATF6B, ATXN7L3, BAHD1, BAMBI, BASP1, BATF, BCL10, BCL2L12, BCL3, BCL6, BCLAF1, BHLHE40, BIRC3, BMPR1B, BMPR2, BRCA1, BRD2, BRMS1, BRWD1, BRWD3, BUD31, C1D, C1QBP, CALR, CASK, CCAR1, CCDC59, CCDC85B, CCL3, CCNC…	3.78126e-07						REACTOME:6985719	Transport of Mature mRNA derived from an Intron-Containing Transcript	[Group1, Group6]	[CDC40, NCBP2, NUP107, NUP133, NUP155, NUP160, NUP205, NUP214, NUP35, NUP50, NUP85, NUP88, NUP93, NUP98, NUPL2, NXF1, RANBP2, RBM8A, RNPS1, SEH1L, SRSF1, SRSF3, SRSF6, SRSF7, TPR, U2AF1]	7.62536e-05
GO:0006355	regulation of transcription, DNA-templated	[Group0]	[AATF, ABT1, ACTR8, ACVRL1, ADAM8, AEBP2, AGO2, AHR, AKIRIN2, AKT1, ANKRA2, ANKRD1, ANKRD49, APEX1, ARF4, ARID5A, ARID5B, ARMCX3, ARRB1, ASH2L, ASXL1, ASXL2, ATAD2B, ATF1, ATF2, ATF3, ATF4, ATF6B, ATXN7L3, BAHD1, BAMBI, BASP1, BATF, BCL10, BCL2L12, BCL3, BCL6, BCLAF1, BHLHE40, BMPR1B, BMPR2, BRCA1, BRD2, BRMS1, BRWD1, BRWD3, BUD31, C1D, C1QBP, CALR, CASK, CCAR1, CCDC59, CCDC85B, CCL3, CCNC, CCNH,…	6.4166e-07						REACTOME:6985720	Transport of Mature Transcript to Cytoplasm	[Group1, Group6]	[CDC40, NCBP2, NUP107, NUP133, NUP155, NUP160, NUP205, NUP214, NUP35, NUP50, NUP85, NUP88, NUP93, NUP98, NUPL2, NXF1, RANBP2, RBM8A, RNPS1, SEH1L, SRSF1, SRSF3, SRSF6, SRSF7, TPR, U2AF1]	7.62536e-05
GO:0050657	nucleic acid transport	[Group13]	[ALKBH5, ALYREF, CASC3, DDX19A, DDX19B, DDX39B, EIF4A3, FYTTD1, IWS1, MAGOHB, NCBP2, NOL6, NUP107, NUP133, NUP155, NUP160, NUP214, NUP35, NUP85, NUP88, NUP93, NXF1, PHAX, PNPT1, POLR2D, QKI, RANBP2, RBM8A, RBMX2, RPSA, SEC13, SEH1L, SETD2, SIDT2, SRSF1, SRSF3, SRSF7, SUPT6H, THOC1, TOMM20, TPR, TSC1, XPO5, XPOT]	1.54188e-06						REACTOME:6986034	Signaling by Interleukins	[Group3]	[BRAP, CHUK, CRK, CSF2RB, CUL1, CUL3, DUSP7, EGFR, FGF2, FRS2, GRB2, IKBKB, IL1A, IL1B, IL1R1, IL1R2, IL1RN, IL2RA, IL2RG, IL6ST, INPP5D, IRAK1, IRAK4, JAK1, JAK3, KIT, KITLG, LAMTOR3, LOC100336606, MAP2K1, MAP2K2, MAP3K8, MAPK1, MAPK3, MYD88, NFKB1, NRG1, PELI1, PHB, PIK3CA, PIK3R1, PPP2CA, PPP5C, PSMA1, PSMA2, PSMA3, PSMA4, PSMA5, PSMA6, PSMB10, PSMB2, PSMB3, PSMB4, PSMB9, PSMC2, PSMC5, PSMC6, …	0.000121793
GO:0050658	RNA transport	[Group13]	[ALKBH5, ALYREF, CASC3, DDX19A, DDX19B, DDX39B, EIF4A3, FYTTD1, IWS1, MAGOHB, NCBP2, NOL6, NUP107, NUP133, NUP155, NUP160, NUP214, NUP35, NUP85, NUP88, NUP93, NXF1, PHAX, PNPT1, POLR2D, QKI, RANBP2, RBM8A, RBMX2, RPSA, SEC13, SEH1L, SETD2, SIDT2, SRSF1, SRSF3, SRSF7, SUPT6H, THOC1, TOMM20, TPR, TSC1, XPO5, XPOT]	1.54188e-06						REACTOME:6985990	Toll Like Receptor 4 (TLR4) Cascade	[Group4]	[ATF1, ATF2, CD14, CHUK, CREB1, CUL1, DHX9, DUSP3, DUSP7, FOS, IKBKB, IRAK1, IRF7, ITGAM, JUN, LBP, MAP2K3, MAP2K4, MAP3K8, MAPK1, MAPK14, MAPK3, MYD88, NFKB1, NFKB2, NFKBIB, PELI1, PPP2CA, RELA, RIPK2, RPS27A, RPS6KA3, S100A12, TAB2, TLR4, TRAF6, UBC, UBE2N]	0.000193014
GO:0051028	mRNA transport	[Group13]	[ALKBH5, ALYREF, CASC3, DDX19A, DDX19B, DDX39B, EIF4A3, FYTTD1, IWS1, MAGOHB, NCBP2, NUP107, NUP133, NUP155, NUP160, NUP214, NUP35, NUP85, NUP88, NUP93, NXF1, POLR2D, QKI, RANBP2, RBM8A, RBMX2, SEC13, SEH1L, SETD2, SRSF1, SRSF3, SRSF7, SUPT6H, THOC1, TPR]	4.609e-06						REACTOME:6985991	Toll-Like Receptors Cascades	[Group4]	[ATF1, ATF2, CD14, CHUK, CREB1, CUL1, DHX36, DHX9, DUSP3, DUSP7, FOS, HSP90B1, IKBKB, IRAK1, IRAK4, IRF7, ITGAM, JUN, LBP, MAP2K3, MAP2K4, MAP3K8, MAPK1, MAPK14, MAPK3, MYD88, NFKB1, NFKB2, NFKBIB, PELI1, PIK3R4, PPP2CA, RELA, RIPK2, RPS27A, RPS6KA3, S100A12, TAB2, TLR3, TLR4, TLR7, TRAF6, UBC, UBE2N]	0.000208844
GO:1903311	regulation of mRNA metabolic process	[Group8]	[AGO2, BTG2, C1QBP, CCNT1, CDC73, CDK9, CTR9, DDX5, EIF4A3, GTPBP1, HSPA8, IWS1, JMJD6, LEO1, NBAS, NCBP2, NSRP1, PABPC1, PAPOLA, PNPT1, PTBP1, PTCD2, RBFOX2, RBM25, RBM4, RBM42, RBM8A, RNF20, RNF219, RNF40, RNPS1, SECISBP2, SNRNP70, SNW1, SRPK1, SRSF6, SRSF7, SUPT5H, SUPT6H, TRA2B, WTAP, ZC3H14, ZC3HAV1, ZFP36]	1.2381e-05						REACTOME:6985994	Activated TLR4 signalling	[Group4]	[ATF1, ATF2, CD14, CHUK, CREB1, CUL1, DHX9, DUSP3, DUSP7, FOS, IKBKB, IRAK1, IRF7, JUN, MAP2K3, MAP2K4, MAP3K8, MAPK1, MAPK14, MAPK3, MYD88, NFKB1, NFKB2, NFKBIB, PELI1, PPP2CA, RELA, RIPK2, RPS27A, RPS6KA3, S100A12, TAB2, TLR4, TRAF6, UBC, UBE2N]	0.000259613
GO:0031123	RNA 3'-end processing	[Group8]	[AGO2, BTG2, CCNT1, CDC73, CDK9, CLP1, CPSF2, CPSF6, CSTF2, CSTF3, CTR9, DKC1, ELAC2, EXOSC2, EXOSC3, EXOSC5, EXOSC8, FBL, LEO1, MTPAP, NCBP2, PABPC1, PAPOLA, PAPOLG, PNPT1, POLR2D, RNF20, RNF40, RPS21, RPSA, SNRPG, SSU72, SUPT5H, SUPV3L1, SYMPK, TRNT1, TUT1, USB1, ZC3H14, ZCCHC6, ZFP36]	1.64997e-05						REACTOME:6986009	TRAF6 mediated induction of NFkB and MAP kinases upon TLR7/8 or 9 activation	[Group4]	[ATF1, ATF2, CHUK, CREB1, CUL1, DHX9, DUSP3, DUSP7, FOS, IKBKB, IRAK1, IRAK4, JUN, MAP2K3, MAP2K4, MAP3K8, MAPK1, MAPK14, MAPK3, MYD88, NFKB1, NFKB2, NFKBIB, PELI1, PPP2CA, RELA, RIPK2, RPS27A, RPS6KA3, S100A12, TAB2, TLR7, TRAF6, UBC, UBE2N]	0.000299687
GO:0000387	spliceosomal snRNP assembly	[Group2]	[AAR2, CLNS1A, DDX20, GEMIN4, GEMIN6, GEMIN8, PRMT5, PRMT7, PRPF3, PRPF6, RBM22, SART1, SART3, SMN2, SNRPB, SNRPC, SNRPD2, SNRPD3, SNRPF, SNRPG, STRAP, USP4]	1.89501e-05						REACTOME:6985993	MyD88-independent TLR3/TLR4 cascade	[Group4]	[ATF1, ATF2, CD14, CHUK, CREB1, CUL1, DHX9, DUSP3, DUSP7, FOS, IKBKB, IRAK1, IRF7, JUN, MAP2K3, MAP2K4, MAP3K8, MAPK1, MAPK14, MAPK3, MYD88, NFKB1, NFKB2, NFKBIB, PPP2CA, RELA, RIPK2, RPS27A, RPS6KA3, S100A12, TAB2, TLR4, TRAF6, UBC]	0.000344719
GO:0030490	maturation of SSU-rRNA	[Group4]	[ABT1, BYSL, CIRH1A, DIEXF, LSM6, NGDN, NOB1, NOL11, NOP14, PWP2, RPS14, RPS16, RPS19, RPS21, RPS24, RPS8, RPSA, TBL3, UTP15, UTP3, UTP6, WDR3]	1.89501e-05						REACTOME:6985995	Toll Like Receptor 3 (TLR3) Cascade	[Group4]	[ATF1, ATF2, CD14, CHUK, CREB1, CUL1, DHX9, DUSP3, DUSP7, FOS, IKBKB, IRAK1, IRF7, JUN, MAP2K3, MAP2K4, MAP3K8, MAPK1, MAPK14, MAPK3, MYD88, NFKB1, NFKB2, NFKBIB, PPP2CA, RELA, RIPK2, RPS27A, RPS6KA3, S100A12, TAB2, TLR4, TRAF6, UBC]	0.000344719
GO:0042255	ribosome assembly	[Group11, Group7]	[ABT1, BRIX1, C1QBP, DDX3X, DHX30, EFTUD1, EIF3A, EIF6, FASTKD2, MDN1, MPV17L2, MRPL20, MTERF4, NSUN4, PPAN, PWP2, RPF2, RPL10, RPL11, RPL24, RPL3, RPL5, RPL6, RPS14, RPS17, RPS19, RPSA, RRP7A, RSL24D1, SBDS]	2.46392e-05						REACTOME:6986033	Interleukin-1 signaling	[Group4]	[CHUK, CUL1, IKBKB, IL1A, IL1B, IL1R1, IL1R2, IL1RN, IRAK1, IRAK4, MAP3K8, MYD88, NFKB1, PELI1, RIPK2, RPS27A, TAB2, TOLLIP, TRAF6, UBC, UBE2N]	0.00043011
GO:0071426	ribonucleoprotein complex export from nucleus	[Group13, Group3]	[ALKBH5, DDX19A, DDX19B, DDX39B, EIF3A, EIF6, FYTTD1, IWS1, NOL6, NUP107, NUP133, NUP155, NUP160, NUP214, NUP85, NUP88, NUP93, NXF1, POLR2D, RAN, RBMX2, RPSA, SDAD1, SETD2, SUPT6H, THOC1, TPR, TSC1, XPOT]	5.99033e-05						REACTOME:6986214	TNFR2 non-canonical NF-kB pathway	[Group3]	[BIRC3, CD40, CHUK, CUL1, LTBR, MAP3K14, NFKB2, PSMA1, PSMA2, PSMA3, PSMA4, PSMA5, PSMA6, PSMB10, PSMB2, PSMB3, PSMB4, PSMB9, PSMC2, PSMC5, PSMC6, PSMD10, PSMD11, PSMD12, PSMD14, PSMD6, PSMD7, PSME1, PSME3, PSMF1, RELB, RPS27A, TNF, TNFRSF12A, TNFRSF1A, TNFRSF1B, TNFRSF6B, TNFSF13B, TRAF2, TRAF3, UBC]	0.000577084
GO:0050684	regulation of mRNA processing	[Group8]	[AGO2, BTG2, C1QBP, CCNT1, CDC73, CDK9, CTR9, DDX5, EIF4A3, HSPA8, IWS1, JMJD6, LEO1, NCBP2, NSRP1, PABPC1, PAPOLA, PTBP1, PTCD2, RBFOX2, RBM25, RBM4, RBM42, RBM8A, RNF20, RNF219, RNF40, RNPS1, SNRNP70, SNW1, SRPK1, SRSF6, SRSF7, SUPT5H, SUPT6H, TRA2B, WTAP, ZC3H14, ZFP36]	7.67879e-05						REACTOME:6986005	MyD88:Mal cascade initiated on plasma membrane	[Group4]	[ATF1, ATF2, CHUK, CREB1, CUL1, DHX9, DUSP3, DUSP7, FOS, IKBKB, IRAK1, JUN, MAP2K3, MAP2K4, MAP3K8, MAPK1, MAPK14, MAPK3, MYD88, NFKB1, NFKB2, NFKBIB, PELI1, PPP2CA, RELA, RIPK2, RPS27A, RPS6KA3, S100A12, TAB2, TRAF6, UBC, UBE2N]	0.000723936
GO:0006401	RNA catabolic process	[Group1]	[AGO2, BTG2, CASC3, CCRN4L, CNOT3, CNOT6, CNOT6L, CSDE1, DCP1A, DXO, EDC3, EIF4A3, ETF1, EXOSC10, EXOSC2, EXOSC3, EXOSC5, EXOSC8, FEN1, GTPBP1, ISG20, LSM1, MAGOHB, MTPAP, NBAS, NCBP2, NUDT16, PABPC1, PAN2, PAPD4, PATL1, PELO, PNPT1, POLR2D, POP1, PRPF18, RBM8A, RNASEH1, RNASEH2B, RNPS1, SECISBP2, SMG1, SMG8, SMG9, SUPV3L1, TUT1, UPF1, ZC3HAV1, ZFP36, ZPR1]	0.000100733						REACTOME:6986006	Toll Like Receptor TLR1:TLR2 Cascade	[Group4]	[ATF1, ATF2, CHUK, CREB1, CUL1, DHX9, DUSP3, DUSP7, FOS, IKBKB, IRAK1, JUN, MAP2K3, MAP2K4, MAP3K8, MAPK1, MAPK14, MAPK3, MYD88, NFKB1, NFKB2, NFKBIB, PELI1, PPP2CA, RELA, RIPK2, RPS27A, RPS6KA3, S100A12, TAB2, TRAF6, UBC, UBE2N]	0.000723936
GO:0006366	transcription from RNA polymerase II promoter	[Group0]	[AATF, ABT1, ACVRL1, AEBP2, AGO2, AHR, AKIRIN2, AKT1, ANKRA2, ANKRD1, ARF4, ARID5A, ARID5B, ARMCX3, ARRB1, ASH2L, ASXL1, ASXL2, ATAD2B, ATF1, ATF2, ATF3, ATF4, ATF6B, BATF, BCL2L12, BCL3, BCL6, BHLHE40, BMPR1B, BMPR2, BRCA1, BRD2, BRMS1, BRWD1, BRWD3, BUD31, C1QBP, CALR, CASK, CCL3, CCNC, CCNH, CCNK, CCNL1, CCNL2, CCNT1, CCPG1, CD3D, CD40, CDC73, CDK12, CDK13, CDK5RAP3, CDK7, CDK9, CDKN2AIP, CEBP…	0.000163478						REACTOME:6986007	Toll Like Receptor 2 (TLR2) Cascade	[Group4]	[ATF1, ATF2, CHUK, CREB1, CUL1, DHX9, DUSP3, DUSP7, FOS, IKBKB, IRAK1, JUN, MAP2K3, MAP2K4, MAP3K8, MAPK1, MAPK14, MAPK3, MYD88, NFKB1, NFKB2, NFKBIB, PELI1, PPP2CA, RELA, RIPK2, RPS27A, RPS6KA3, S100A12, TAB2, TRAF6, UBC, UBE2N]	0.000723936
GO:0010501	RNA secondary structure unwinding	[Group5]	[AGO2, DDX10, DDX19A, DDX19B, DDX20, DDX21, DDX23, DDX24, DDX27, DDX39B, DDX3X, DDX46, DDX47, DDX5, DDX50, DDX51, DDX52, DDX54, DDX55, DDX56, DDX6, DHX36, EIF4A1, EIF4A2, EIF4A3]	0.000328531						REACTOME:6986008	Toll Like Receptor TLR6:TLR2 Cascade	[Group4]	[ATF1, ATF2, CHUK, CREB1, CUL1, DHX9, DUSP3, DUSP7, FOS, IKBKB, IRAK1, JUN, MAP2K3, MAP2K4, MAP3K8, MAPK1, MAPK14, MAPK3, MYD88, NFKB1, NFKB2, NFKBIB, PELI1, PPP2CA, RELA, RIPK2, RPS27A, RPS6KA3, S100A12, TAB2, TRAF6, UBC, UBE2N]	0.000723936
GO:0006357	regulation of transcription from RNA polymerase II promoter	[Group0]	[AATF, ABT1, ACVRL1, AEBP2, AGO2, AHR, AKIRIN2, AKT1, ANKRA2, ANKRD1, ARF4, ARID5A, ARID5B, ARMCX3, ARRB1, ASH2L, ASXL1, ASXL2, ATAD2B, ATF1, ATF2, ATF3, ATF4, ATF6B, BATF, BCL2L12, BCL3, BCL6, BHLHE40, BMPR1B, BMPR2, BRCA1, BRD2, BRMS1, BRWD1, BRWD3, BUD31, C1QBP, CALR, CASK, CCL3, CCNC, CCNH, CCNK, CCNL1, CCNL2, CCNT1, CCPG1, CD3D, CD40, CDC73, CDK12, CDK13, CDK5RAP3, CDK7, CDK9, CDKN2AIP, CEBP…	0.000386943						REACTOME:6986013	MyD88 cascade initiated on plasma membrane	[Group4]	[ATF1, ATF2, CHUK, CREB1, CUL1, DHX9, DUSP3, DUSP7, FOS, IKBKB, IRAK1, JUN, MAP2K3, MAP2K4, MAP3K8, MAPK1, MAPK14, MAPK3, MYD88, NFKB1, NFKB2, NFKBIB, PELI1, PPP2CA, RELA, RIPK2, RPS27A, RPS6KA3, S100A12, TAB2, TRAF6, UBC, UBE2N]	0.000723936
GO:0070647	protein modification by small protein conjugation or removal	[Group16]	[AIMP2, AKT1, ANAPC1, ANAPC7, APEX1, ARRB1, ASB7, ASB8, ASXL1, ATXN7L3, BCL10, BIRC3, BRAP, BRCA1, CAND1, CBLB, CDC16, CDC73, CDK5RAP3, CDK9, CHFR, CISH, COPS8, CTR9, CTU1, CTU2, CUL1, CUL2, CUL3, CUL4A, CUL4B, CYLD, DAXX, DCAF15, DCUN1D1, DCUN1D5, DERL1, DNAJA1, DNAJB2, DYNC1LI1, EGR1, FANCL, FBXL14, FBXO22, FBXO32, FBXO45, FBXO5, FBXO7, FEM1A, FEM1C, FZR1, GLMN, GTPBP4, HDAC4, HERC6, HERPUD1, H…	0.000589981						REACTOME:6986014	Toll Like Receptor 10 (TLR10) Cascade	[Group4]	[ATF1, ATF2, CHUK, CREB1, CUL1, DHX9, DUSP3, DUSP7, FOS, IKBKB, IRAK1, JUN, MAP2K3, MAP2K4, MAP3K8, MAPK1, MAPK14, MAPK3, MYD88, NFKB1, NFKB2, NFKBIB, PELI1, PPP2CA, RELA, RIPK2, RPS27A, RPS6KA3, S100A12, TAB2, TRAF6, UBC, UBE2N]	0.000723936
GO:0006405	RNA export from nucleus	[Group13, Group3]	[ALKBH5, DDX19A, DDX19B, DDX39B, FYTTD1, IWS1, NCBP2, NOL6, NUP107, NUP133, NUP155, NUP160, NUP214, NUP85, NUP88, NUP93, NXF1, PHAX, POLR2D, RBMX2, RPSA, SETD2, SUPT6H, THOC1, TPR, TSC1, XPO5, XPOT]	0.000760601						REACTOME:6986015	Toll Like Receptor 5 (TLR5) Cascade	[Group4]	[ATF1, ATF2, CHUK, CREB1, CUL1, DHX9, DUSP3, DUSP7, FOS, IKBKB, IRAK1, JUN, MAP2K3, MAP2K4, MAP3K8, MAPK1, MAPK14, MAPK3, MYD88, NFKB1, NFKB2, NFKBIB, PELI1, PPP2CA, RELA, RIPK2, RPS27A, RPS6KA3, S100A12, TAB2, TRAF6, UBC, UBE2N]	0.000723936
GO:0010629	negative regulation of gene expression	[Group0]	[A2M, ADAR, AEBP2, AGO2, AHR, AKT1, ARID5B, ARRB1, ASXL1, ASXL2, ATAD2B, ATF3, BAHD1, BASP1, BCDIN3D, BCL2L12, BCL3, BCL6, BCLAF1, BHLHE40, BIRC3, BRCA1, BRMS1, BTG2, C1D, C1QBP, CALR, CAPRIN1, CCDC85B, CCL3, CCL4, CCNT1, CCRN4L, CD38, CD46, CDC73, CDK5RAP3, CDK9, CDKN1A, CEBPG, CLP1, CNOT3, CNOT6L, CNPY2, CPEB4, CREB1, CREM, CRYAB, CTGF, CTR9, CUL3, CUX1, CYLD, DAPK3, DAXX, DDIT3, DDX20, DDX3X, …	0.000912676						REACTOME:6986020	TRIF-mediated TLR3/TLR4 signaling	[Group4]	[ATF1, ATF2, CHUK, CREB1, CUL1, DHX9, DUSP3, DUSP7, FOS, IKBKB, IRAK1, IRF7, JUN, MAP2K3, MAP2K4, MAP3K8, MAPK1, MAPK14, MAPK3, MYD88, NFKB1, NFKB2, NFKBIB, PPP2CA, RELA, RIPK2, RPS27A, RPS6KA3, S100A12, TAB2, TRAF6, UBC]	0.000835123
GO:0006402	mRNA catabolic process	[Group1]	[AGO2, BTG2, CASC3, CCRN4L, CNOT3, CNOT6, CNOT6L, CSDE1, DCP1A, DXO, EDC3, EIF4A3, ETF1, EXOSC10, EXOSC2, EXOSC3, EXOSC5, EXOSC8, GTPBP1, LSM1, MAGOHB, MTPAP, NBAS, NCBP2, NUDT16, PABPC1, PAN2, PAPD4, PATL1, PELO, PNPT1, POLR2D, PRPF18, RBM8A, RNPS1, SECISBP2, SMG1, SMG8, SMG9, SUPV3L1, TUT1, UPF1, ZC3HAV1, ZFP36]	0.00116082						REACTOME:6985830	Immune System	[Group3]	[ACTB, ACTR2, ACTR3, AMICA1, AP2A2, AP2B1, ARF1, ATF1, ATF2, BCL10, BIRC3, BLMH, BRAP, CALR, CANX, CAPZA1, CBLB, CD14, CD3D, CD40, CD46, CDKN1A, CHUK, CLTA, CLTC, CREB1, CRK, CRP, CSF2RB, CUL1, CUL3, CYLD, DAPP1, DHX36, DHX9, DUSP3, DUSP7, DYNC1H1, DYNC1LI2, EGFR, EIF4A1, EIF4A2, EIF4A3, EIF4E, EIF4E2, EIF4G1, EIF4G2, EIF4G3, ELMO1, ELMO2, ERAP1, ERAP2, FCGR1A, FGF2, FLNB, FOS, FOXO1, FRS2, GHR, …	0.001684
GO:0043632	modification-dependent macromolecule catabolic process	[Group16]	[AKT1, ANKZF1, APEX1, ARRB1, BAG5, BAG6, BIRC3, CHFR, CUL1, CUL2, CUL3, CUL4A, CUL4B, CYLD, DDIT3, DERL1, DERL2, DNAJB2, DNAJB9, DNAJC10, DYNC1LI1, EDEM3, ERLIN1, EXOSC10, EXOSC2, EXOSC3, EXOSC8, FAF2, FBXL14, FBXO22, FBXO45, FZR1, GLMN, GNB2L1, GSK3A, HERC6, HERPUD1, HSP90AB1, HSP90B1, HSPBP1, IL33, ISG15, KAT5, KEAP1, KLHL28, KLHL8, MAD2L2, MYLIP, N4BP1, NEDD4L, NPLOC4, NSMCE2, NUB1, PCBP2, PCN…	0.00172823						REACTOME:6986835	Transcriptional regulation by small RNAs	[Group1]	[AGO2, IPO8, NUP107, NUP133, NUP155, NUP160, NUP205, NUP214, NUP35, NUP50, NUP85, NUP88, NUP93, NUP98, NUPL2, POLR2A, POLR2B, POLR2C, POLR2D, POLR2F, POLR2I, POLR2K, RAN, RANBP2, SEH1L, TPR]	0.0017926
GO:0032268	regulation of cellular protein metabolic process	[Group9]	[A2M, AARS, ABCF1, ACKR3, ACVRL1, ADAM8, ADAM9, ADAR, AGO2, AIMP2, AKT1, ANGPTL4, ANKLE2, ANXA2, APAF1, ARID5A, ARL6IP5, ARPP19, ARRB1, ASXL2, ATF3, BAG4, BAG5, BAG6, BCDIN3D, BCL10, BCL2L12, BCL3, BCL6, BIRC3, BMPR1B, BMPR2, BRCA1, BRMS1, BTG2, C1QBP, CAPRIN1, CASC3, CASP8AP2, CCDC88C, CCL19, CCL2, CCL20, CCL3, CCL4, CCNC, CCNE1, CCNH, CCNK, CCNL1, CCNL2, CCNT1, CCNY, CCNYL1, CD40, CD44, CDK12, …	0.00212281						REACTOME:6986496	Regulation of mRNA stability by proteins that bind AU-rich elements	[Group3]	[DCP1A, EIF4G1, ELAVL1, EXOSC1, EXOSC2, EXOSC3, EXOSC5, EXOSC8, HSPA8, HSPB1, NUP214, PABPC1, PRKCD, PSMA1, PSMA2, PSMA3, PSMA4, PSMA5, PSMA6, PSMB10, PSMB2, PSMB3, PSMB4, PSMB9, PSMC2, PSMC5, PSMC6, PSMD10, PSMD11, PSMD12, PSMD14, PSMD6, PSMD7, PSME1, PSME3, PSMF1, RPS27A, UBC, YWHAB]	0.00341992
GO:0006511	ubiquitin-dependent protein catabolic process	[Group16]	[AKT1, ANKZF1, APEX1, ARRB1, BAG5, BAG6, BIRC3, CHFR, CUL1, CUL2, CUL3, CUL4A, CUL4B, CYLD, DDIT3, DERL1, DERL2, DNAJB2, DNAJB9, DNAJC10, DYNC1LI1, EDEM3, ERLIN1, FAF2, FBXL14, FBXO22, FBXO45, FZR1, GLMN, GNB2L1, GSK3A, HERC6, HERPUD1, HSP90AB1, HSP90B1, HSPBP1, IL33, KAT5, KEAP1, KLHL28, KLHL8, MAD2L2, MYLIP, N4BP1, NEDD4L, NPLOC4, NSMCE2, NUB1, PCBP2, PCNP, PDCL3, PLK3, PSEN1, PSMA1, PSMA2, PSM…	0.00296033						REACTOME:6986067	Cyclin A:Cdk2-associated events at S phase entry	[Group3]	[CCNE1, CCNH, CDK7, CDKN1A, CKS1B, CUL1, FZR1, MAX, MYC, PSMA1, PSMA2, PSMA3, PSMA4, PSMA5, PSMA6, PSMB10, PSMB2, PSMB3, PSMB4, PSMB9, PSMC2, PSMC5, PSMC6, PSMD10, PSMD11, PSMD12, PSMD14, PSMD6, PSMD7, PSME1, PSME3, PSMF1, RPS27A, UBC]	0.00529316
GO:0000462	maturation of SSU-rRNA from tricistronic rRNA transcript (SSU-rRNA, 5.8S rRNA, LSU-rRNA)	[Group4]	[ABT1, BYSL, DIEXF, NGDN, PWP2, RPS14, RPS16, RPS19, RPS21, RPS24, RPS8, RPSA, TBL3, UTP15, UTP3, UTP6, WDR3]	0.00299666						REACTOME:6986248	Gene Silencing by RNA	[Group1]	[AGO2, DGCR8, IPO8, NUP107, NUP133, NUP155, NUP160, NUP205, NUP214, NUP35, NUP50, NUP85, NUP88, NUP93, NUP98, NUPL2, POLR2A, POLR2B, POLR2C, POLR2D, POLR2F, POLR2I, POLR2K, RAN, RANBP2, SEH1L, TPR, TSN, XPO5]	0.00741527
GO:0008033	tRNA processing	[Group4]	[AARS, ADAT1, CDK5RAP1, CLP1, CTU1, CTU2, DUS3L, DUS4L, ELAC2, ELP3, FBL, METTL1, MOCS3, MTO1, OSGEP, OSGEPL1, POP1, POP4, POP5, PUS1, PUS7, QTRT1, RPP14, RPUSD2, RPUSD3, THG1L, TRIT1, TRMT1, TRMT10C, TRMT112, TRMT12, TRMT6, TRMT61A, TRNT1, TSEN2, TSEN34]	0.00398615						REACTOME:6986018	MAP kinase activation in TLR cascade	[Group4]	[ATF1, ATF2, CHUK, CREB1, CUL1, DUSP3, DUSP7, FOS, IKBKB, IRAK1, JUN, MAP2K3, MAP2K4, MAP3K8, MAPK1, MAPK14, MAPK3, NFKB1, PPP2CA, RIPK2, RPS27A, RPS6KA3, TAB2, TRAF6, UBC]	0.00754466
GO:0000956	nuclear-transcribed mRNA catabolic process	[Group1]	[AGO2, BTG2, CASC3, CCRN4L, CNOT3, CNOT6, CNOT6L, CSDE1, DCP1A, DXO, EDC3, EIF4A3, ETF1, EXOSC10, EXOSC2, EXOSC3, EXOSC5, EXOSC8, LSM1, MAGOHB, MTPAP, NBAS, NCBP2, PABPC1, PAN2, PAPD4, PATL1, PELO, POLR2D, PRPF18, RBM8A, RNPS1, SECISBP2, SMG1, SMG8, SMG9, TUT1, UPF1, ZFP36]	0.0042009						REACTOME:6986240	FCERI mediated NF-kB activation	[Group3]	[BCL10, CHUK, CUL1, IKBKB, LYN, NFKB1, PSMA1, PSMA2, PSMA3, PSMA4, PSMA5, PSMA6, PSMB10, PSMB2, PSMB3, PSMB4, PSMB9, PSMC2, PSMC5, PSMC6, PSMD10, PSMD11, PSMD12, PSMD14, PSMD6, PSMD7, PSME1, PSME3, PSMF1, RELA, RPS27A, TAB2, TRAF6, UBC, UBE2D3, UBE2N]	0.00929125
GO:0043631	RNA polyadenylation	[Group8]	[CCNT1, CDC73, CDK9, CLP1, CPSF2, CPSF6, CTR9, LEO1, MTPAP, PAPD4, PAPOLA, PAPOLG, PNPT1, RNF20, RNF40, SSU72, SUPT5H, SYMPK, TUT1, ZC3H14]	0.00441121						REACTOME:6985562	Cyclin E associated events during G1/S transition	[Group3]	[CCNE1, CCNH, CDK7, CDKN1A, CKS1B, CUL1, MAX, MYC, PSMA1, PSMA2, PSMA3, PSMA4, PSMA5, PSMA6, PSMB10, PSMB2, PSMB3, PSMB4, PSMB9, PSMC2, PSMC5, PSMC6, PSMD10, PSMD11, PSMD12, PSMD14, PSMD6, PSMD7, PSME1, PSME3, PSMF1, RPS27A, UBC]	0.0101817
GO:0001510	RNA methylation	[Group4]	[BCDIN3D, DIMT1, EMG1, FBL, FTSJ3, KIAA1429, METTL1, METTL14, METTL16, METTL3, NSUN4, RNMT, RNMTL1, TFB1M, TFB2M, TGS1, TRMT1, TRMT112, TRMT2A, TRMT6, TRMT61A, WTAP]	0.00459559						REACTOME:6986499	AUF1 (hnRNP D0) binds and destabilizes mRNA	[Group3]	[EIF4G1, HSPA8, HSPB1, PABPC1, PSMA1, PSMA2, PSMA3, PSMA4, PSMA5, PSMA6, PSMB10, PSMB2, PSMB3, PSMB4, PSMB9, PSMC2, PSMC5, PSMC6, PSMD10, PSMD11, PSMD12, PSMD14, PSMD6, PSMD7, PSME1, PSME3, PSMF1, RPS27A, UBC]	0.0125439
GO:0006913	nucleocytoplasmic transport	[Group13, Group3]	[ADAR, AKT1, ALKBH5, APOD, BAMBI, BCL3, BCL6, CALR, CCL19, CDKN1A, CEP57, CHCHD4, CHERP, CTDSPL2, CYLD, DDX19A, DDX19B, DDX39B, EGFR, EIF3A, EIF6, F2R, FBXO22, FYTTD1, HCLS1, HSPA9, HYAL2, IER3, IPO4, IPO5, IPO7, IPO8, IWS1, JUN, KEAP1, KPNA1, KPNA2, KPNA4, KPNA7, LITAF, LSG1, MAVS, MED1, MTOR, MX2, MYBBP1A, NCBP2, NEDD4L, NEMF, NOL6, NSRP1, NUP107, NUP133, NUP155, NUP160, NUP205, NUP214, NUP35, …	0.00587187						REACTOME:6986054	SMAD2/SMAD3:SMAD4 heterotrimer regulates transcription	[Group5]	[CCNC, CCNT1, CDK8, CDK9, E2F4, E2F5, MEN1, RPS27A, SMAD3, SMAD4, SNW1, SP1, TFDP2, UBC]	0.0149028
GO:0010558	negative regulation of macromolecule biosynthetic process	[Group0]	[AATF, ACVRL1, ADAR, AEBP2, AGO2, AHR, ANKRD1, ARID5B, ARRB1, ASXL1, ASXL2, ATAD2B, ATF3, BAHD1, BASP1, BCDIN3D, BCL3, BCL6, BCLAF1, BHLHE40, BMPR2, BRCA1, BRMS1, BTG2, C1D, C1QBP, CALR, CAPRIN1, CCDC85B, CCL3, CCL4, CD276, CD38, CDC73, CDK5RAP3, CEBPG, CLTC, CNOT3, CNOT6L, CPEB4, CREB1, CREM, CTR9, CUL3, CUX1, CYLD, DAPK3, DAXX, DDIT3, DDX20, DDX3X, DDX5, DDX54, DEDD, DGCR8, DKK3, DLL4, DNAJB5, …	0.00686327						REACTOME:6986768	SUMOylation	[Group1]	[BRCA1, NDNL2, NSMCE2, NUP107, NUP133, NUP155, NUP160, NUP205, NUP214, NUP35, NUP50, NUP85, NUP88, NUP93, NUP98, NUPL2, PHC2, PIAS2, RAD21, RAD52, RANBP2, RNF168, RNF2, SAE1, SCMH1, SEH1L, STAG1, TDG, TPR, UBA2, UBE2I, WRN, XRCC4]	0.0160998
GO:0031124	mRNA 3'-end processing	[Group8]	[AGO2, BTG2, CCNT1, CDC73, CDK9, CLP1, CPSF2, CPSF6, CSTF2, CTR9, LEO1, MTPAP, NCBP2, PABPC1, PAPOLA, PAPOLG, PNPT1, POLR2D, RNF20, RNF40, SNRPG, SSU72, SUPT5H, SYMPK, TUT1, ZC3H14, ZFP36]	0.00708604						REACTOME:6985651	Cleavage of Growing Transcript in the Termination Region	[Group6]	[CDC40, CLP1, CPSF2, CSTF2, CSTF3, NCBP2, PAPOLA, RBM8A, RNPS1, SNRPD3, SNRPF, SNRPG, SRSF1, SRSF3, SRSF6, SRSF7, U2AF1]	0.0161884
GO:0032446	protein modification by small protein conjugation	[Group16]	[AIMP2, AKT1, ANAPC1, ANAPC7, ARRB1, ASB7, ASB8, BCL10, BIRC3, BRAP, BRCA1, CAND1, CBLB, CDC16, CDC73, CDK5RAP3, CDK9, CHFR, CISH, CTR9, CTU1, CTU2, CUL1, CUL2, CUL3, CUL4A, CUL4B, DAXX, DCAF15, DCUN1D1, DCUN1D5, DERL1, DNAJA1, DNAJB2, DYNC1LI1, EGR1, FANCL, FBXL14, FBXO22, FBXO32, FBXO45, FBXO5, FBXO7, FEM1A, FEM1C, FZR1, GLMN, GTPBP4, HDAC4, HERC6, HERPUD1, HSPBP1, IFIH1, IPP, ISG15, KBTBD2, KB…	0.0071504						REACTOME:6985652	RNA Polymerase II Transcription Termination	[Group6]	[CDC40, CLP1, CPSF2, CSTF2, CSTF3, NCBP2, PAPOLA, RBM8A, RNPS1, SNRPD3, SNRPF, SNRPG, SRSF1, SRSF3, SRSF6, SRSF7, U2AF1]	0.0161884
GO:0051168	nuclear export	[Group13, Group3]	[ADAR, ALKBH5, CALR, CHCHD4, CTDSPL2, DDX19A, DDX19B, DDX39B, EIF3A, EIF6, FYTTD1, HSPA9, IWS1, LSG1, NCBP2, NEMF, NOL6, NUP107, NUP133, NUP155, NUP160, NUP214, NUP85, NUP88, NUP93, NUTF2, NXF1, PHAX, POLR2D, RAN, RANGAP1, RBMX2, RPSA, SDAD1, SETD2, STYX, SUPT6H, THOC1, TPR, TSC1, TXN, XPO4, XPO5, XPOT]	0.00725271						REACTOME:6986593	Activation of NF-kappaB in B cells	[Group3]	[BCL10, CHUK, CUL1, IKBKB, NFKB1, NFKBIB, PSMA1, PSMA2, PSMA3, PSMA4, PSMA5, PSMA6, PSMB10, PSMB2, PSMB3, PSMB4, PSMB9, PSMC2, PSMC5, PSMC6, PSMD10, PSMD11, PSMD12, PSMD14, PSMD6, PSMD7, PSME1, PSME3, PSMF1, RELA, RPS27A, UBC]	0.0192864
GO:0019941	modification-dependent protein catabolic process	[Group16]	[AKT1, ANKZF1, APEX1, ARRB1, BAG5, BAG6, BIRC3, CHFR, CUL1, CUL2, CUL3, CUL4A, CUL4B, CYLD, DDIT3, DERL1, DERL2, DNAJB2, DNAJB9, DNAJC10, DYNC1LI1, EDEM3, ERLIN1, FAF2, FBXL14, FBXO22, FBXO45, FZR1, GLMN, GNB2L1, GSK3A, HERC6, HERPUD1, HSP90AB1, HSP90B1, HSPBP1, IL33, ISG15, KAT5, KEAP1, KLHL28, KLHL8, MAD2L2, MYLIP, N4BP1, NEDD4L, NPLOC4, NSMCE2, NUB1, PCBP2, PCNP, PDCL3, PLK3, PSEN1, PSMA1, PSM…	0.00785276						REACTOME:6986241	CLEC7A (Dectin-1) signaling	[Group3]	[BCL10, CHUK, CUL1, IKBKB, IL1B, MAP3K14, NFKB1, NFKB2, PRKCD, PSMA1, PSMA2, PSMA3, PSMA4, PSMA5, PSMA6, PSMB10, PSMB2, PSMB3, PSMB4, PSMB9, PSMC2, PSMC5, PSMC6, PSMD10, PSMD11, PSMD12, PSMD14, PSMD6, PSMD7, PSME1, PSME3, PSMF1, RELA, RELB, RPS27A, TAB2, TRAF6, UBC, UBE2D3, UBE2N]	0.0218628
GO:0010628	positive regulation of gene expression	[Group0]	[AATF, ABCF1, ACVRL1, ADAM8, ADAR, AGO2, AHR, AKIRIN2, AKT1, AMH, ANK2, ANKRD1, ANKRD49, ARF4, ARID5A, ARID5B, ARMCX3, ARRB1, ASH2L, ASXL1, ASXL2, ATAD2B, ATF1, ATF2, ATF3, ATF4, ATF6B, ATXN7L3, BAMBI, BATF, BCDIN3D, BCL10, BCL2L12, BCL3, BCLAF1, BMPR1B, BMPR2, BRCA1, BTG2, BUD31, C1QBP, CALR, CASK, CCL3, CCNC, CCNH, CCNK, CCNL1, CCNL2, CCNT1, CCPG1, CD38, CD3D, CD40, CD44, CD46, CDC73, CDH3, CDK…	0.00842092						REACTOME:6986255	Class I MHC mediated antigen processing &amp; presentation	[Group3]	[BLMH, CALR, CANX, ERAP1, ERAP2, FCGR1A, ITGAV, NCF1, NCF2, NCF4, PDIA3, PSMA1, PSMA2, PSMA3, PSMA4, PSMA5, PSMA6, PSMB10, PSMB2, PSMB3, PSMB4, PSMB9, PSMC2, PSMC5, PSMC6, PSMD10, PSMD11, PSMD12, PSMD14, PSMD6, PSMD7, PSME1, PSME3, PSMF1, RPS27A, SEC13, SEC24D, TAP1, TAPBP, UBC, UBE2A]	0.0260326
GO:0043038	amino acid activation	[Group4]	[AARS, CARS, DARS, EPRS, FARSA, FARSB, HARS, IARS, LARS, LARS2, LRRC47, MARS, MARS2, NARS, QARS, QRSL1, RARS, SARS, TARS, TARS2, VARS, WARS, WARS2, YARS]	0.00922471						REACTOME:6986174	Signaling by VEGF	[Group3]	[BRAP, CRK, CSF2RB, CUL3, DUSP7, EGFR, ELMO1, ELMO2, FGF2, FLT1, FRS2, GRB2, HSP90AA1, HSPB1, IL2RA, IL2RG, ITGAV, JAK1, JAK3, KIT, KITLG, LAMTOR3, LOC100336606, MAP2K1, MAP2K2, MAPK1, MAPK14, MAPK3, MAPKAP1, MTOR, NCF1, NCF2, NCF4, NCK2, NRG1, NRP2, PHB, PIK3CA, PIK3R1, PPP2CA, PPP5C, PRKCD, PSMA1, PSMA2, PSMA3, PSMA4, PSMA5, PSMA6, PSMB10, PSMB2, PSMB3, PSMB4, PSMB9, PSMC2, PSMC5, PSMC6, PSMD10…	0.0268272
GO:0043039	tRNA aminoacylation	[Group4]	[AARS, CARS, DARS, EPRS, FARSA, FARSB, HARS, IARS, LARS, LARS2, LRRC47, MARS, MARS2, NARS, QARS, QRSL1, RARS, SARS, TARS, TARS2, VARS, WARS, WARS2, YARS]	0.00922471						REACTOME:6986836	Dectin-1 mediated noncanonical NF-kB signaling	[Group3]	[CHUK, CUL1, MAP3K14, NFKB2, PSMA1, PSMA2, PSMA3, PSMA4, PSMA5, PSMA6, PSMB10, PSMB2, PSMB3, PSMB4, PSMB9, PSMC2, PSMC5, PSMC6, PSMD10, PSMD11, PSMD12, PSMD14, PSMD6, PSMD7, PSME1, PSME3, PSMF1, RELB, RPS27A, UBC]	0.0276264
GO:0006464	cellular protein modification process	[Group9]	[AASDHPPT, ACKR3, ACVRL1, ADAM10, ADAM8, ADAM9, ADAR, AIMP2, AKAP13, AKT1, ALG1, ALG12, ALG2, ALG5, ANAPC1, ANAPC7, ANGPTL4, ANKLE2, APEX1, ARF4, ARID5A, ARL6IP5, ARPP19, ARRB1, ASB7, ASB8, ASH2L, ASXL1, ASXL2, ATF2, ATF3, ATG12, ATG4B, ATP1A1, ATXN7L3, B3GALNT2, B4GALT1, BAG4, BAG6, BCL10, BCL6, BIRC3, BMPR1B, BMPR2, BRAP, BRCA1, BRMS1, BTG1, BTG2, C1GALT1, C1GALT1C1, CAND1, CASK, CBLB, CCDC88C,…	0.00969412						REACTOME:6986837	NIK--&gt;noncanonical NF-kB signaling	[Group3]	[CHUK, CUL1, MAP3K14, NFKB2, PSMA1, PSMA2, PSMA3, PSMA4, PSMA5, PSMA6, PSMB10, PSMB2, PSMB3, PSMB4, PSMB9, PSMC2, PSMC5, PSMC6, PSMD10, PSMD11, PSMD12, PSMD14, PSMD6, PSMD7, PSME1, PSME3, PSMF1, RELB, RPS27A, UBC]	0.0276264
GO:0002181	cytoplasmic translation	[Group15]	[CPEB4, EIF2D, EIF3A, EIF3D, EIF3J, EIF3M, GSPT1, RBM4, RPL15, RPL17, RPL22, RPL22L1, RPL26L1, RPL27A, RPL29, RPL30, RPL4, RPL6, RPL7, RPL7L1, RPL8, RPL9, UNK]	0.00985327						REACTOME:6986022	Fc epsilon receptor (FCERI) signaling	[Group3]	[BCL10, BRAP, CDKN1A, CHUK, CREB1, CSF2RB, CUL1, CUL3, DUSP7, EGFR, FGF2, FOS, FOXO1, FRS2, GRB2, IKBKB, IL2RA, IL2RG, JAK1, JAK3, JUN, KIT, KITLG, LAMTOR3, LAT2, LCP2, LOC100336606, LYN, MAP2K1, MAP2K2, MAP2K4, MAPK1, MAPK3, MAPKAP1, MTOR, NFKB1, NR4A1, NRG1, PHB, PIK3CA, PIK3R1, PPP2CA, PPP5C, PSMA1, PSMA2, PSMA3, PSMA4, PSMA5, PSMA6, PSMB10, PSMB2, PSMB3, PSMB4, PSMB9, PSMC2, PSMC5, PSMC6, PSM…	0.0278828
GO:0045934	negative regulation of nucleobase-containing compound metabolic process	[Group0]	[ACVRL1, AEBP2, AHR, ANKRD1, ARID5B, ARRB1, ASXL1, ASXL2, ATAD2B, ATF3, BAHD1, BASP1, BCDIN3D, BCL3, BCL6, BCLAF1, BHLHE40, BMPR2, BRCA1, BRMS1, C1D, C1QBP, CALR, CCDC85B, CCL3, CCL4, CCNT1, CD38, CDC73, CDK5RAP3, CDK9, CEBPG, CREB1, CREM, CTR9, CUL3, CUX1, CYLD, DAXX, DDIT3, DDX20, DDX5, DDX54, DEDD, DKK3, DLL4, DNAJB5, DNAJB6, DNAJC2, EDN1, EFNA1, EGR1, EIF4A2, ELF2, ELF3, ELP2, EPC1, ERCC1, ER…	0.0107246						REACTOME:6986286	Autodegradation of the E3 ubiquitin ligase COP1	[Group3]	[PSMA1, PSMA2, PSMA3, PSMA4, PSMA5, PSMA6, PSMB10, PSMB2, PSMB3, PSMB4, PSMB9, PSMC2, PSMC5, PSMC6, PSMD10, PSMD11, PSMD12, PSMD14, PSMD6, PSMD7, PSME1, PSME3, PSMF1, RFWD2, RPS27A, TP53, UBC]	0.0289785
GO:0006406	mRNA export from nucleus	[Group13]	[ALKBH5, DDX19A, DDX19B, DDX39B, FYTTD1, IWS1, NUP107, NUP133, NUP155, NUP160, NUP214, NUP85, NUP88, NUP93, NXF1, POLR2D, RBMX2, SETD2, SUPT6H, THOC1, TPR]	0.0107386						REACTOME:6985566	p53-Dependent G1 DNA Damage Response	[Group3]	[CCNE1, CDKN1A, PSMA1, PSMA2, PSMA3, PSMA4, PSMA5, PSMA6, PSMB10, PSMB2, PSMB3, PSMB4, PSMB9, PSMC2, PSMC5, PSMC6, PSMD10, PSMD11, PSMD12, PSMD14, PSMD6, PSMD7, PSME1, PSME3, PSMF1, RFWD2, RPS27A, TP53, UBC]	0.0329469
GO:0071427	mRNA-containing ribonucleoprotein complex export from nucleus	[Group13]	[ALKBH5, DDX19A, DDX19B, DDX39B, FYTTD1, IWS1, NUP107, NUP133, NUP155, NUP160, NUP214, NUP85, NUP88, NUP93, NXF1, POLR2D, RBMX2, SETD2, SUPT6H, THOC1, TPR]	0.0107386						REACTOME:6985567	p53-Dependent G1/S DNA damage checkpoint	[Group3]	[CCNE1, CDKN1A, PSMA1, PSMA2, PSMA3, PSMA4, PSMA5, PSMA6, PSMB10, PSMB2, PSMB3, PSMB4, PSMB9, PSMC2, PSMC5, PSMC6, PSMD10, PSMD11, PSMD12, PSMD14, PSMD6, PSMD7, PSME1, PSME3, PSMF1, RFWD2, RPS27A, TP53, UBC]	0.0329469
GO:0006378	mRNA polyadenylation	[Group8]	[CCNT1, CDC73, CDK9, CLP1, CPSF2, CPSF6, CTR9, LEO1, MTPAP, PAPOLA, PAPOLG, PNPT1, RNF20, RNF40, SSU72, SUPT5H, SYMPK, TUT1, ZC3H14]	0.0107473						REACTOME:6986108	SCF(Skp2)-mediated degradation of p27/p21	[Group3]	[CCNE1, CDKN1A, CKS1B, CUL1, PSMA1, PSMA2, PSMA3, PSMA4, PSMA5, PSMA6, PSMB10, PSMB2, PSMB3, PSMB4, PSMB9, PSMC2, PSMC5, PSMC6, PSMD10, PSMD11, PSMD12, PSMD14, PSMD6, PSMD7, PSME1, PSME3, PSMF1, RPS27A, UBC]	0.0329469
GO:1903320	regulation of protein modification by small protein conjugation or removal	[Group16]	[AIMP2, ARRB1, BCL10, BIRC3, BRCA1, CDK5RAP3, CDK9, CHFR, CTR9, CUL1, DAXX, DCUN1D1, DCUN1D5, DERL1, DNAJA1, DNAJB2, DYNC1LI1, EGR1, FBXO22, FBXO5, FEM1A, FZR1, GLMN, GTPBP4, HDAC4, HERPUD1, HSPBP1, ISG15, MAD2L2, MUL1, N4BP1, NDFIP2, NDNL2, OGT, PAXIP1, PDCL3, PELI1, PRMT3, PSEN1, PSMD10, PSMG2, PTK2, PTK2B, RASSF1, RCHY1, RIPK2, RNF20, RNF40, SART3, SPHK1, SPRTN, TOPORS, TPR, TRAF7, TRIB3, TRIM…	0.0158214						REACTOME:6986775	SUMOylation of DNA damage response and repair proteins	[Group1]	[BRCA1, NDNL2, NSMCE2, NUP107, NUP133, NUP155, NUP160, NUP205, NUP214, NUP35, NUP50, NUP85, NUP88, NUP93, NUP98, NUPL2, PHC2, PIAS2, RAD21, RAD52, RANBP2, RNF168, RNF2, SCMH1, SEH1L, STAG1, TDG, TPR, UBE2I, WRN, XRCC4]	0.0357707
GO:0000027	ribosomal large subunit assembly	[Group11]	[BRIX1, DHX30, FASTKD2, MDN1, MRPL20, PPAN, RPF2, RPL10, RPL11, RPL24, RPL3, RPL5, RPL6, RSL24D1]	0.0170482						REACTOME:6986776	SUMO E3 ligases SUMOylate target proteins	[Group1]	[BRCA1, NDNL2, NSMCE2, NUP107, NUP133, NUP155, NUP160, NUP205, NUP214, NUP35, NUP50, NUP85, NUP88, NUP93, NUP98, NUPL2, PHC2, PIAS2, RAD21, RAD52, RANBP2, RNF168, RNF2, SCMH1, SEH1L, STAG1, TDG, TPR, UBE2I, WRN, XRCC4]	0.0357707
GO:0031396	regulation of protein ubiquitination	[Group16]	[AIMP2, ARRB1, BCL10, BIRC3, BRCA1, CDK5RAP3, CDK9, CHFR, CTR9, CUL1, DAXX, DCUN1D1, DCUN1D5, DERL1, DNAJA1, DNAJB2, DYNC1LI1, FBXO22, FBXO5, FEM1A, FZR1, GLMN, GTPBP4, HERPUD1, HSPBP1, ISG15, MAD2L2, N4BP1, NDFIP2, NDNL2, OGT, PAXIP1, PDCL3, PELI1, PRMT3, PSEN1, PSMD10, PSMG2, PTK2, PTK2B, RASSF1, RCHY1, RIPK2, RNF20, RNF40, SPHK1, SPRTN, TOPORS, TPR, TRIB3, TRIP12, UBE2L3, UBE2N, UBE2S, UBE3A, …	0.018512						REACTOME:6986199	VEGFA-VEGFR2 Pathway	[Group3]	[BRAP, CRK, CSF2RB, CUL3, DUSP7, EGFR, ELMO1, ELMO2, FGF2, FRS2, GRB2, HSP90AA1, HSPB1, IL2RA, IL2RG, ITGAV, JAK1, JAK3, KIT, KITLG, LAMTOR3, LOC100336606, MAP2K1, MAP2K2, MAPK1, MAPK14, MAPK3, MAPKAP1, MTOR, NCF1, NCF2, NCF4, NCK2, NRG1, PHB, PIK3CA, PIK3R1, PPP2CA, PPP5C, PRKCD, PSMA1, PSMA2, PSMA3, PSMA4, PSMA5, PSMA6, PSMB10, PSMB2, PSMB3, PSMB4, PSMB9, PSMC2, PSMC5, PSMC6, PSMD10, PSMD11, PS…	0.0359266
GO:0045727	positive regulation of translation	[Group12]	[ABCF1, BCL3, C1QBP, DDX3X, DNAJC3, EEF2, EIF4A3, ELAVL1, FAM129A, IMP3, IMPACT, MPV17L2, MTOR, NCK2, NPM1, NSUN4, POLR2D, RPS6KB1, RPS9, THBS1, TNF, UPF3A, USP16, YTHDF1]	0.0185504						REACTOME:6986081	SCF-beta-TrCP mediated degradation of Emi1	[Group3]	[CUL1, FBXO5, FZR1, PSMA1, PSMA2, PSMA3, PSMA4, PSMA5, PSMA6, PSMB10, PSMB2, PSMB3, PSMB4, PSMB9, PSMC2, PSMC5, PSMC6, PSMD10, PSMD11, PSMD12, PSMD14, PSMD6, PSMD7, PSME1, PSME3, PSMF1, RPS27A, UBC]	0.0392601
GO:0006886	intracellular protein transport	[Group3]	[ADAR, AFG3L2, AKT1, ANK2, AP2A2, AP2B1, AP3B1, AP3D1, AP3M1, AP3S1, AP3S2, AP4M1, APEX1, APOD, ARFRP1, ATG4B, BAG4, BAMBI, BCL3, BCL6, BLZF1, CALR, CCL19, CDKN1A, CEP57, CHCHD4, CHERP, CLTA, CLTC, COG3, COPA, COPB1, COPB2, COPZ1, CTDSPL2, CYLD, DERL1, DERL2, DYNLT1, EGFR, F2R, FAF2, FBXO7, GDI1, GGA1, GGA3, GNB2L1, GOLGA1, GOLGA4, GOLGA7, GSK3A, HCLS1, HERPUD1, HGS, HM13, HPS4, HSP90AA1, HSP90B1…	0.0195596						REACTOME:6985565	Stabilization of p53	[Group3]	[PSMA1, PSMA2, PSMA3, PSMA4, PSMA5, PSMA6, PSMB10, PSMB2, PSMB3, PSMB4, PSMB9, PSMC2, PSMC5, PSMC6, PSMD10, PSMD11, PSMD12, PSMD14, PSMD6, PSMD7, PSME1, PSME3, PSMF1, RFWD2, RPS27A, TP53, UBC]	0.0469817
GO:0016567	protein ubiquitination	[Group16]	[AIMP2, AKT1, ANAPC1, ANAPC7, ARRB1, ASB7, ASB8, BCL10, BIRC3, BRAP, BRCA1, CAND1, CBLB, CDC16, CDC73, CDK5RAP3, CDK9, CHFR, CISH, CTR9, CUL1, CUL2, CUL3, CUL4A, CUL4B, DAXX, DCAF15, DCUN1D1, DCUN1D5, DERL1, DNAJA1, DNAJB2, DYNC1LI1, FANCL, FBXL14, FBXO22, FBXO32, FBXO45, FBXO5, FBXO7, FEM1A, FEM1C, FZR1, GLMN, GTPBP4, HERC6, HERPUD1, HSPBP1, IPP, ISG15, KBTBD2, KBTBD6, KEAP1, KLHL12, KLHL18, KLH…	0.0200749
GO:2000113	negative regulation of cellular macromolecule biosynthetic process	[Group0]	[AATF, ACVRL1, ADAR, AEBP2, AGO2, AHR, ANKRD1, ARID5B, ARRB1, ASXL1, ASXL2, ATAD2B, ATF3, BAHD1, BASP1, BCDIN3D, BCL3, BCL6, BCLAF1, BHLHE40, BMPR2, BRCA1, BRMS1, BTG2, C1D, C1QBP, CALR, CAPRIN1, CCDC85B, CD38, CDC73, CDK5RAP3, CEBPG, CNOT3, CNOT6L, CPEB4, CREB1, CREM, CTR9, CUL3, CUX1, CYLD, DAPK3, DAXX, DDIT3, DDX20, DDX3X, DDX5, DEDD, DGCR8, DKK3, DLL4, DNAJB5, DNAJB6, DNAJC2, EDN1, EFNA1, EGR…	0.0200795
GO:0006418	tRNA aminoacylation for protein translation	[Group4]	[AARS, CARS, DARS, EPRS, FARSA, FARSB, HARS, IARS, LARS, LARS2, LRRC47, MARS, MARS2, NARS, QARS, RARS, SARS, TARS, TARS2, VARS, WARS, WARS2, YARS]	0.0202822
GO:0090501	RNA phosphodiester bond hydrolysis	[Group14]	[ABT1, AGO2, BOP1, CCRN4L, CLP1, CNOT6, CNOT6L, CPSF2, CSTF2, CSTF3, DGCR8, ELAC2, EXOSC10, EXOSC2, EXOSC3, EXOSC8, FEN1, ISG20, MRPL44, NCBP2, NOB1, NOL9, PAN2, PDE12, PNPT1, POP1, POP4, POP5, REXO2, RNASEH1, RNASEK, RPP14, RPS21, RPSA, TSEN2, TSEN34, TSN, TUT1, USB1, XRN2]	0.0219212
GO:1903322	positive regulation of protein modification by small protein conjugation or removal	[Group16]	[AIMP2, BCL10, BIRC3, BRCA1, CDK5RAP3, CDK9, CHFR, CTR9, CUL1, DCUN1D1, DCUN1D5, DERL1, DNAJB2, FBXO22, FZR1, HDAC4, HSPBP1, MUL1, NDFIP2, NDNL2, PAXIP1, PELI1, PSMD10, PTK2, PTK2B, RASSF1, RCHY1, RIPK2, RNF20, RNF40, SART3, SPHK1, SPRTN, TOPORS, TRAF7, TRIB3, UBE2L3, UBE2N, UBE2S, UBE3A]	0.0219212
GO:0044257	cellular protein catabolic process	[Group16]	[AKT1, ANKZF1, ANXA2, APEX1, ARRB1, BAG5, BAG6, BIRC3, CDK5RAP3, CHFR, CTSC, CTSH, CUL1, CUL2, CUL3, CUL4A, CUL4B, CYLD, DDIT3, DENND3, DERL1, DERL2, DNAJB2, DNAJB9, DNAJC10, DNAJC3, DYNC1LI1, EDEM3, ERLIN1, FAF2, FBXL14, FBXO22, FBXO45, FZR1, GLMN, GNB2L1, GSK3A, HERC6, HERPUD1, HSP90AB1, HSP90B1, HSPBP1, HTRA2, IL33, ISG15, KAT5, KEAP1, KLHL28, KLHL8, MAD2L2, MSN, MYLIP, N4BP1, NEDD4L, NPLOC4, …	0.022178
GO:0051253	negative regulation of RNA metabolic process	[Group0]	[AEBP2, AHR, ANKRD1, ARID5B, ARRB1, ASXL1, ASXL2, ATAD2B, ATF3, BAHD1, BASP1, BCDIN3D, BCL3, BCL6, BCLAF1, BHLHE40, BRCA1, BRMS1, C1D, C1QBP, CALR, CCDC85B, CCL3, CCL4, CCNT1, CD38, CDC73, CDK5RAP3, CDK9, CEBPG, CREB1, CREM, CTR9, CUL3, CUX1, CYLD, DAXX, DDIT3, DDX20, DDX5, DDX54, DEDD, DKK3, DLL4, DNAJB5, DNAJB6, EDN1, EFNA1, EGR1, EIF4A2, ELF2, ELF3, ELP2, EPC1, ESRRA, ETS2, EZH2, FNIP1, FOXO1,…	0.0233037
GO:0032496	response to lipopolysaccharide	[Group10]	[ABR, ADAM9, AKIRIN2, AKT1, ANKRD1, CCL2, CCL3, CCR7, CCRN4L, CD14, CD40, CDC73, CTR9, CXCL10, CXCL11, CXCL13, CXCL16, CXCL3, CXCL5, F2R, FAS, GCH1, HMGB2, HNRNPA0, IDO1, IL10, IRAK1, JUNB, JUND, LBP, LITAF, LTBR, LYN, MAPK1, MAPK3, MTDH, MYD88, NFKB1, NFKBIB, NOS2, PELI1, PLSCR4, PRDM1, PTGER3, RELA, RIPK2, RPS6KA3, S100A14, SERPINE1, TCF3, TLR4, TNF, TNFRSF1A, TNFRSF1B, TNFRSF21, TNFRSF6B, TRAF…	0.0262401
GO:0051603	proteolysis involved in cellular protein catabolic process	[Group16]	[AKT1, ANKZF1, APEX1, ARRB1, BAG5, BAG6, BIRC3, CHFR, CTSC, CTSH, CUL1, CUL2, CUL3, CUL4A, CUL4B, CYLD, DDIT3, DERL1, DERL2, DNAJB2, DNAJB9, DNAJC10, DNAJC3, DYNC1LI1, EDEM3, ERLIN1, FAF2, FBXL14, FBXO22, FBXO45, FZR1, GLMN, GNB2L1, GSK3A, HERC6, HERPUD1, HSP90AB1, HSP90B1, HSPBP1, IL33, ISG15, KAT5, KEAP1, KLHL28, KLHL8, MAD2L2, MYLIP, N4BP1, NEDD4L, NPLOC4, NSMCE2, NUB1, OSBPL7, PCBP2, PCNP, PD…	0.02645
GO:0034250	positive regulation of cellular amide metabolic process	[Group12]	[ABCF1, BCL3, C1QBP, CYR61, DDX3X, DNAJC3, EEF2, EIF4A3, ELAVL1, FAM129A, IMP3, IMPACT, MPV17L2, MTOR, NCK2, NPM1, NSUN4, POLR2D, PRKCD, RPS6KB1, RPS9, THBS1, TNF, UPF3A, USP16, YTHDF1]	0.0278158
GO:0031398	positive regulation of protein ubiquitination	[Group16]	[AIMP2, BCL10, BIRC3, BRCA1, CDK5RAP3, CDK9, CHFR, CTR9, CUL1, DCUN1D1, DCUN1D5, DERL1, DNAJB2, FBXO22, FZR1, HSPBP1, NDFIP2, NDNL2, PAXIP1, PELI1, PSMD10, PTK2, PTK2B, RASSF1, RCHY1, RIPK2, RNF20, RNF40, SPHK1, SPRTN, TOPORS, TRIB3, UBE2L3, UBE2N, UBE2S, UBE3A]	0.0279645
GO:0051254	positive regulation of RNA metabolic process	[Group0]	[AATF, ACVRL1, ADAM8, AGO2, AHR, AKIRIN2, AKT1, ANKRD1, ANKRD49, ARF4, ARID5A, ARID5B, ARMCX3, ARRB1, ASH2L, ASXL1, ASXL2, ATAD2B, ATF1, ATF2, ATF3, ATF4, ATF6B, ATXN7L3, BAMBI, BATF, BCL10, BCL2L12, BCL3, BCLAF1, BMPR1B, BMPR2, BRCA1, BTG2, BUD31, CASK, CCL3, CCNC, CCNH, CCNK, CCNL1, CCNL2, CCNT1, CCPG1, CD38, CD3D, CD40, CDC73, CDK5RAP3, CDK7, CDK9, CDKN2AIP, CEBPG, CHD1, CHUK, CREB1, CREB3L2, …	0.0461392

## Sheet: greenyellow
Biological Process (BP)					Molecular Function (MF)					REACTOME pathway
BP GOID	BP GOTerm	BP GO Groups	Associated Genes Found	Term PValue Corrected with Benjamini-Hochberg	MF GOID	MF GOTerm	MF GO Groups	Associated Genes Found	Term PValue Corrected with Benjamini-Hochberg	REACTOME ID	REACTOME Pathway	REACTOME Groups	Associated Genes Found	Term PValue Corrected with Benjamini-Hochberg
GO:0009199	ribonucleoside triphosphate metabolic process	[Group0]	[AK2, ATP5A1, ATP5C1, ATP5F1, ATP5G1, ATP5G3, ATP5J, ATP5J2, BAD, COX5A, COX7A2L, CTPS2, ENO1, HK1, ITPA, NCOR1, NDUFAB1, NDUFB8, NDUFB9, NME6, PFKL, PGAM1, PGK1, RHOQ, SIRT6, STOML2, UCK2, UCKL1, UQCR10, UQCRB, VCP]	9.92346e-06	GO:0003723	RNA binding	[Group6]	[AARS2, AARSD1, ACIN1, ACTN4, API5, ATP5A1, ATP5C1, BAZ2A, C29H11orf68, CBX8, CCDC124, CLK3, CPSF3, CS, DAZAP1, DCPS, DDX1, DDX42, DNMT1, EEF1D, EIF1AX, EIF3I, EIF4B, EIF4E2, EIF4H, ERAL1, ERH, EWSR1, EXOSC4, FAM120A, FAM32A, FAM50A, FASTKD2, FKBP3, FUS, GLRX3, GTF2E2, GTF2F1, HIST1H1C, HMGB2, HMGB3, HNRNPD, HNRNPR, HNRNPUL1, ICT1, IMMT, IMP4, IREB2, KHDRBS1, KNOP1, LARP7, LOC515358, LSM2, LSM3, …	6.5455e-08	REACTOME:6986832	Mitochondrial translation	[Group2]	[AURKAIP1, ICT1, MRPL10, MRPL18, MRPL2, MRPL21, MRPL24, MRPL27, MRPL37, MRPL39, MRPL41, MRPL43, MRPL46, MRPL48, MRPL51, MRPS11, MRPS15, MRPS16, MRPS23, MRPS24, MRPS25, MRPS30, MRPS33, MRPS5, MRPS7]	3.26492e-08
GO:0009141	nucleoside triphosphate metabolic process	[Group0]	[AK2, ATP5A1, ATP5C1, ATP5F1, ATP5G1, ATP5G3, ATP5J, ATP5J2, BAD, COX5A, COX7A2L, CTPS2, DTYMK, ENO1, HK1, ITPA, NCOR1, NDUFAB1, NDUFB8, NDUFB9, NME6, PFKL, PGAM1, PGK1, RHOQ, SIRT6, STOML2, UCK2, UCKL1, UQCR10, UQCRB, VCP]	1.08192e-05	GO:0044822	poly(A) RNA binding	[Group6]	[ACIN1, ACTN4, API5, ATP5A1, ATP5C1, C29H11orf68, CCDC124, CLK3, CS, DAZAP1, DDX1, DDX42, EIF1AX, EIF4E2, EIF4H, ERAL1, ERH, EWSR1, FAM120A, FAM32A, FAM50A, FASTKD2, FKBP3, GLRX3, GTF2E2, GTF2F1, HIST1H1C, HMGB2, HMGB3, HNRNPD, HNRNPR, HNRNPUL1, IMMT, IREB2, KHDRBS1, KNOP1, LARP7, LSM2, LSM3, LSM4, MAP4, MBD2, MRPL10, MRPL2, MRPL21, MRPL27, MRPL37, MRPL39, MRPL41, MRPL43, MRPS11, MRPS23, MRPS24, …	1.84614e-06	REACTOME:6986831	Mitochondrial translation elongation	[Group2]	[AURKAIP1, ICT1, MRPL10, MRPL18, MRPL2, MRPL21, MRPL24, MRPL27, MRPL37, MRPL39, MRPL41, MRPL43, MRPL46, MRPL48, MRPL51, MRPS11, MRPS15, MRPS16, MRPS23, MRPS24, MRPS25, MRPS30, MRPS33, MRPS5, MRPS7]	4.61269e-08
GO:0032543	mitochondrial translation	[Group5]	[AARS2, ICT1, MRPL2, MRPL51, MRPS11, MRPS15, MRPS16, MRPS23, MRPS24, MRPS25, MRPS5, MRPS7, MTG1, MTIF2, TUFM]	5.32051e-05	GO:0003676	nucleic acid binding	[Group6]	[AARS2, AARSD1, ACIN1, ACTL6A, ACTN4, AKNA, APEX2, API5, ARID2, ARID3B, ATF7, ATP5A1, ATP5C1, BAZ2A, BCL2, BRD7, C18H19orf40, C29H11orf68, CARM1, CBX8, CCDC124, CCDC71, CELF5, CENPB, CERS2, CHD4, CLK3, CPSF3, CS, DAZAP1, DCPS, DDX1, DDX42, DNMT1, DNMT3A, DRAP1, EEF1D, EIF1AX, EIF3I, EIF4B, EIF4E2, EIF4H, ERAL1, ERCC6, ERH, ERI2, EWSR1, EXOSC4, FAM120A, FAM32A, FAM50A, FASTKD2, FKBP3, FUS, GLRX3, …	0.000445949	REACTOME:6986833	Mitochondrial translation termination	[Group2]	[AURKAIP1, ICT1, MRPL10, MRPL18, MRPL2, MRPL21, MRPL24, MRPL27, MRPL37, MRPL39, MRPL41, MRPL43, MRPL46, MRPL48, MRPL51, MRPS11, MRPS15, MRPS16, MRPS23, MRPS24, MRPS25, MRPS30, MRPS33, MRPS5, MRPS7]	4.61269e-08
GO:0009205	purine ribonucleoside triphosphate metabolic process	[Group0]	[AK2, ATP5A1, ATP5C1, ATP5F1, ATP5G1, ATP5G3, ATP5J, ATP5J2, BAD, COX5A, COX7A2L, ENO1, HK1, ITPA, NCOR1, NDUFAB1, NDUFB8, NDUFB9, NME6, PFKL, PGAM1, PGK1, RHOQ, SIRT6, STOML2, UQCR10, UQCRB, VCP]	5.59516e-05	GO:0003954	NADH dehydrogenase activity	[Group1]	[NARFL, NDUFA5, NDUFA9, NDUFAB1, NDUFB1, NDUFB4, NDUFB8, NDUFB9]	0.00365334	REACTOME:6985597	Gene Expression	[Group5]	[AAAS, CHD4, COX5A, COX6B1, COX7A2L, CPSF3, DCPS, DNMT1, EDC4, EEF1D, EIF1AX, EIF3I, EIF4B, EIF4H, ERCC6, EXOSC4, FUS, GEMIN2, GPX2, GTF2E2, GTF2F1, GTF2H4, HNRNPD, HNRNPR, HNRNPUL1, LSM2, LSM3, LSM4, LSM5, MBD2, MED27, MED30, MLST8, MNAT1, MTA3, NCOR1, NELFE, NUP188, NUP37, NUP43, POLR2E, POLR2G, POLR2H, POLR2J, POLR2L, POLR3A, POLR3B, POLR3H, PRDX1, PRPF8, PSMB1, PSMB2, PSMB5, PSMB6, PSMB8, PSM…	1.31049e-07
GO:0009144	purine nucleoside triphosphate metabolic process	[Group0]	[AK2, ATP5A1, ATP5C1, ATP5F1, ATP5G1, ATP5G3, ATP5J, ATP5J2, BAD, COX5A, COX7A2L, ENO1, HK1, ITPA, NCOR1, NDUFAB1, NDUFB8, NDUFB9, NME6, PFKL, PGAM1, PGK1, RHOQ, SIRT6, STOML2, UQCR10, UQCRB, VCP]	6.21317e-05	GO:0015078	hydrogen ion transmembrane transporter activity	[Group0]	[ATP5A1, ATP5C1, ATP5F1, ATP5G1, ATP5G3, ATP5J, ATP6V0B, ATP6V1E1, COX5A, COX6B1, COX7A2, COX7A2L, UQCRFS1]	0.0062877	REACTOME:6985973	Respiratory electron transport, ATP synthesis by chemiosmotic coupling, and heat production by uncoupling proteins.	[Group11]	[ATP5A1, ATP5C1, ATP5F1, ATP5G1, ATP5G3, ATP5J, ATP5J2, COX5A, COX6B1, COX7A2L, CYC1, NDUFA9, NDUFAB1, NDUFB1, NDUFB2, NDUFB3, NDUFB4, NDUFB8, NDUFB9, NDUFC1, NDUFS6, NDUFV3, UQCR10, UQCRB, UQCRFS1]	1.53726e-07
GO:0008380	RNA splicing	[Group3]	[ACIN1, CLK2, CLK3, DAZAP1, DCPS, DDX1, GEMIN2, LSM2, LSM3, LSM4, LSM5, PPIH, PPIL1, PRPF31, PRPF8, RAVER1, RBM10, RPS13, SF3B2, SNRNP25, SNRNP35, SNRPA, SNRPA1, SON, SRSF2, TFIP11, THOC3, THOC5, THRAP3, TRPT1, TSEN54, TXNL4A, ZBTB8OS, ZMAT2, ZMAT5]	9.52728e-05	GO:0036402	proteasome-activating ATPase activity	[Group4]	[PSMC1, PSMC3, PSMC4, PSMC5]	0.0121773	REACTOME:6985541	DNA Replication	[Group3]	[CDK2, GINS3, GMNN, MCM6, ORC6, PCNA, PSMB1, PSMB2, PSMB5, PSMB6, PSMB8, PSMC1, PSMC3, PSMC4, PSMC5, PSMD1, PSMD2, PSMD3, PSMD4, PSMD8, PSMD9, PSME2, RFC3, RPA1, RPA2]	7.2597e-07
GO:0009119	ribonucleoside metabolic process	[Group0]	[AK2, APIP, APOBEC3A, APRT, ATP5A1, ATP5C1, ATP5F1, ATP5G1, ATP5G3, ATP5J, ATP5J2, BAD, COX5A, COX7A2L, CTPS2, ENO1, HK1, HPRT1, NCOR1, NDUFAB1, NDUFB8, NDUFB9, NME6, PFKL, PGAM1, PGK1, RHOQ, SIRT6, STOML2, UCK2, UCKL1, UQCR10, UQCRB, VCP]	0.000127271	GO:0003899	DNA-directed RNA polymerase activity	[Group3]	[POLR2E, POLR2G, POLR2H, POLR2J, POLR2L, POLR3A, POLR3B, POLR3H, RPAP1]	0.0123098	REACTOME:6985537	DNA Replication Pre-Initiation	[Group3]	[CDK2, GMNN, MCM6, ORC6, PSMB1, PSMB2, PSMB5, PSMB6, PSMB8, PSMC1, PSMC3, PSMC4, PSMC5, PSMD1, PSMD2, PSMD3, PSMD4, PSMD8, PSMD9, PSME2, RPA1, RPA2]	7.43992e-07
GO:0009123	nucleoside monophosphate metabolic process	[Group0]	[AK2, APRT, ATP5A1, ATP5C1, ATP5F1, ATP5G1, ATP5G3, ATP5J, ATP5J2, BAD, COX5A, COX7A2L, DTYMK, ENO1, HK1, HPRT1, NCOR1, NDUFAB1, NDUFB8, NDUFB9, PFKL, PGAM1, PGK1, SIRT6, STOML2, UCK2, UCKL1, UQCR10, UQCRB, VCP]	0.000144093	GO:0034062	RNA polymerase activity	[Group3]	[POLR2E, POLR2G, POLR2H, POLR2J, POLR2L, POLR3A, POLR3B, POLR3H, RPAP1]	0.0123098	REACTOME:6985538	M/G1 Transition	[Group3]	[CDK2, GMNN, MCM6, ORC6, PSMB1, PSMB2, PSMB5, PSMB6, PSMB8, PSMC1, PSMC3, PSMC4, PSMC5, PSMD1, PSMD2, PSMD3, PSMD4, PSMD8, PSMD9, PSME2, RPA1, RPA2]	7.43992e-07
GO:0009161	ribonucleoside monophosphate metabolic process	[Group0]	[AK2, APRT, ATP5A1, ATP5C1, ATP5F1, ATP5G1, ATP5G3, ATP5J, ATP5J2, BAD, COX5A, COX7A2L, ENO1, HK1, HPRT1, NCOR1, NDUFAB1, NDUFB8, NDUFB9, PFKL, PGAM1, PGK1, SIRT6, STOML2, UCK2, UCKL1, UQCR10, UQCRB, VCP]	0.000154176	GO:0001056	RNA polymerase III activity	[Group3]	[POLR2E, POLR2H, POLR2L, POLR3A, POLR3B, POLR3H]	0.0175282	REACTOME:6985547	Synthesis of DNA	[Group3]	[CDK2, GINS3, MCM6, ORC6, PCNA, PSMB1, PSMB2, PSMB5, PSMB6, PSMB8, PSMC1, PSMC3, PSMC4, PSMC5, PSMD1, PSMD2, PSMD3, PSMD4, PSMD8, PSMD9, PSME2, RFC3, RPA1, RPA2]	1.05501e-06
GO:0046034	ATP metabolic process	[Group0]	[AK2, ATP5A1, ATP5C1, ATP5F1, ATP5G1, ATP5G3, ATP5J, ATP5J2, BAD, COX5A, COX7A2L, ENO1, HK1, NCOR1, NDUFAB1, NDUFB8, NDUFB9, PFKL, PGAM1, PGK1, SIRT6, STOML2, UQCR10, UQCRB, VCP]	0.000154317	GO:0016651	oxidoreductase activity, acting on NAD(P)H	[Group1]	[CYBB, ECSIT, NARFL, NDUFA5, NDUFA9, NDUFAB1, NDUFB1, NDUFB4, NDUFB8, NDUFB9, TXNRD1]	0.0222069	REACTOME:6986297	Regulation of ornithine decarboxylase (ODC)	[Group3]	[OAZ1, PSMB1, PSMB2, PSMB5, PSMB6, PSMB8, PSMC1, PSMC3, PSMC4, PSMC5, PSMD1, PSMD2, PSMD3, PSMD4, PSMD8, PSMD9, PSME2]	2.37521e-06
GO:0009201	ribonucleoside triphosphate biosynthetic process	[Group0]	[ATP5A1, ATP5C1, ATP5F1, ATP5G1, ATP5G3, ATP5J, ATP5J2, CTPS2, NME6, STOML2, UCK2, UCKL1, VCP]	0.000164066	GO:0070628	proteasome binding	[Group7]	[ADRM1, BAG6, SACS, SGTA, VCP]	0.0236645	REACTOME:6985552	Removal of licensing factors from origins	[Group3]	[CDK2, GMNN, MCM6, ORC6, PSMB1, PSMB2, PSMB5, PSMB6, PSMB8, PSMC1, PSMC3, PSMC4, PSMC5, PSMD1, PSMD2, PSMD3, PSMD4, PSMD8, PSMD9, PSME2]	2.49518e-06
GO:0009116	nucleoside metabolic process	[Group0]	[AK2, APIP, APOBEC3A, APRT, ATP5A1, ATP5C1, ATP5F1, ATP5G1, ATP5G3, ATP5J, ATP5J2, BAD, COX5A, COX7A2L, CTPS2, ENO1, HK1, HPRT1, NCOR1, NDUFAB1, NDUFB8, NDUFB9, NME6, PFKL, PGAM1, PGK1, RHOQ, SIRT6, STOML2, UCK2, UCKL1, UQCR10, UQCRB, VCP]	0.000165539	GO:0003923	GPI-anchor transamidase activity	[Group11]	[PIGS, PIGT, PIGU]	0.0306317	REACTOME:6985555	CDK-mediated phosphorylation and removal of Cdc6	[Group3]	[CDK2, PSMB1, PSMB2, PSMB5, PSMB6, PSMB8, PSMC1, PSMC3, PSMC4, PSMC5, PSMD1, PSMD2, PSMD3, PSMD4, PSMD8, PSMD9, PSME2]	2.50097e-06
GO:0007005	mitochondrion organization	[Group5]	[AARS2, ACIN1, ACTL6A, ATG3, ATG4D, ATG5, BAD, BAK1, BCL2, BCS1L, CDC37, CHCHD3, CHCHD5, COX7A2L, DNAJA3, HPS4, ICT1, IMMT, LETM1, LONP1, LSM4, MRPL2, MRPL51, MRPS11, MRPS15, MRPS16, MRPS23, MRPS24, MRPS25, MRPS5, MRPS7, MTG1, MTIF2, MTX1, NDUFB9, NDUFS6, PARL, PDCD5, PHB2, POLR3A, PRELID1, PSMD8, SSBP1, STOML2, TIMM44, TIMM50, TMEM39B, TOMM40, TOMM6, TUFM, WIPI1, WIPI2]	0.000174577	GO:0000166	nucleotide binding	[Group9]	[AARS2, AARSD1, ACIN1, ACVR2B, ADRBK1, AK2, APRT, ARF3, ATP5A1, AURKA, BCS1L, BTK, CDC37, CDK2, CDK4, CDK6, CELF5, CHD4, CLK2, CLK3, CSK, CSNK1D, CSNK1G2, CSNK2A1, CTPS2, CYBB, DAZAP1, DDX1, DDX42, DNAJA3, DNM2, DNMT1, DRG2, DTYMK, DUS1L, EIF4B, EIF4H, ERAL1, ERCC6, ERP29, EWSR1, FES, FUS, GAK, GALK2, GNAI2, GNL1, GRK6, GRPEL1, HK1, HNRNPD, HNRNPR, HPRT1, IDH3A, ITPA, KARS, LARP7, LIMK2, LONP1, M…	0.0353119	REACTOME:6985725	Ubiquitin-dependent degradation of Cyclin D1	[Group3]	[CDK4, PSMB1, PSMB2, PSMB5, PSMB6, PSMB8, PSMC1, PSMC3, PSMC4, PSMC5, PSMD1, PSMD2, PSMD3, PSMD4, PSMD8, PSMD9, PSME2]	2.50097e-06
GO:0009142	nucleoside triphosphate biosynthetic process	[Group0]	[ATP5A1, ATP5C1, ATP5F1, ATP5G1, ATP5G3, ATP5J, ATP5J2, CTPS2, DTYMK, NME6, STOML2, UCK2, UCKL1, VCP]	0.000181859	GO:1901265	nucleoside phosphate binding	[Group9]	[AARS2, AARSD1, ACIN1, ACVR2B, ADRBK1, AK2, APRT, ARF3, ATP5A1, AURKA, BCS1L, BTK, CDC37, CDK2, CDK4, CDK6, CELF5, CHD4, CLK2, CLK3, CSK, CSNK1D, CSNK1G2, CSNK2A1, CTPS2, CYBB, DAZAP1, DDX1, DDX42, DNAJA3, DNM2, DNMT1, DRG2, DTYMK, DUS1L, EIF4B, EIF4H, ERAL1, ERCC6, ERP29, EWSR1, FES, FUS, GAK, GALK2, GNAI2, GNL1, GRK6, GRPEL1, HK1, HNRNPD, HNRNPR, HPRT1, IDH3A, ITPA, KARS, LARP7, LIMK2, LONP1, M…	0.0353119	REACTOME:6985726	Ubiquitin-dependent degradation of Cyclin D	[Group3]	[CDK4, PSMB1, PSMB2, PSMB5, PSMB6, PSMB8, PSMC1, PSMC3, PSMC4, PSMC5, PSMD1, PSMD2, PSMD3, PSMD4, PSMD8, PSMD9, PSME2]	2.50097e-06
GO:1901657	glycosyl compound metabolic process	[Group0]	[AK2, APIP, APOBEC3A, APRT, ATP5A1, ATP5C1, ATP5F1, ATP5G1, ATP5G3, ATP5J, ATP5J2, BAD, COX5A, COX7A2L, CTPS2, ENO1, HK1, HPRT1, NCOR1, NDUFAB1, NDUFB8, NDUFB9, NME6, PFKL, PGAM1, PGK1, RHOQ, SIRT6, STOML2, UCK2, UCKL1, UQCR10, UQCRB, VCP]	0.000189035	GO:0001055	RNA polymerase II activity	[Group3]	[POLR2E, POLR2H, POLR2J, POLR2L]	0.0400366	REACTOME:6985606	The citric acid (TCA) cycle and respiratory electron transport	[Group11]	[ATP5A1, ATP5C1, ATP5F1, ATP5G1, ATP5G3, ATP5J, ATP5J2, COX5A, COX6B1, COX7A2L, CS, CYC1, DLAT, IDH3A, NDUFA9, NDUFAB1, NDUFB1, NDUFB2, NDUFB3, NDUFB4, NDUFB8, NDUFB9, NDUFC1, NDUFS6, NDUFV3, SLC16A3, UQCR10, UQCRB, UQCRFS1]	2.61188e-06
GO:0009126	purine nucleoside monophosphate metabolic process	[Group0]	[AK2, APRT, ATP5A1, ATP5C1, ATP5F1, ATP5G1, ATP5G3, ATP5J, ATP5J2, BAD, COX5A, COX7A2L, ENO1, HK1, HPRT1, NCOR1, NDUFAB1, NDUFB8, NDUFB9, PFKL, PGAM1, PGK1, SIRT6, STOML2, UQCR10, UQCRB, VCP]	0.000326711	GO:0042393	histone binding	[Group5]	[ASF1A, BRD7, CARM1, CBX8, HINFP, HMGB1, HMGB2, IPO9, L3MBTL2, MSL3, PHF12, PRKCB, SMARCA4, SUZ12, WDR5]	0.0428245	REACTOME:6985545	CDT1 association with the CDC6:ORC:origin complex	[Group3]	[GMNN, ORC6, PSMB1, PSMB2, PSMB5, PSMB6, PSMB8, PSMC1, PSMC3, PSMC4, PSMC5, PSMD1, PSMD2, PSMD3, PSMD4, PSMD8, PSMD9, PSME2]	2.69976e-06
GO:0009167	purine ribonucleoside monophosphate metabolic process	[Group0]	[AK2, APRT, ATP5A1, ATP5C1, ATP5F1, ATP5G1, ATP5G3, ATP5J, ATP5J2, BAD, COX5A, COX7A2L, ENO1, HK1, HPRT1, NCOR1, NDUFAB1, NDUFB8, NDUFB9, PFKL, PGAM1, PGK1, SIRT6, STOML2, UQCR10, UQCRB, VCP]	0.000326711	GO:0008134	transcription factor binding	[Group12]	[ACTN4, BCL2, BRD7, CHD4, CSNK2B, DNAJA3, DNMT1, DRAP1, EEF1D, FAF1, GAS2L1, GMNN, GTF2F1, HCLS1, HMGB2, ICMT, MED30, MKKS, MTDH, NCOR1, NFYB, NIF3L1, PHF12, PSMC1, PSMC3, PSMC4, PSMC5, RBBP8, RPTOR, SMARCA4, SNF8, SRI, STK36, THRAP3, USP7]	0.0449359	REACTOME:6986603	Cross-presentation of soluble exogenous antigens (endosomes)	[Group3]	[PSMB1, PSMB2, PSMB5, PSMB6, PSMB8, PSMC1, PSMC3, PSMC4, PSMC5, PSMD1, PSMD2, PSMD3, PSMD4, PSMD8, PSMD9, PSME2]	2.79273e-06
GO:0006396	RNA processing	[Group3]	[AARS2, ACIN1, CLK2, CLK3, CPSF3, CPSF3L, DAZAP1, DCPS, DDX1, DUS1L, ERI2, EXOSC4, GEMIN2, HNRNPUL1, IMP4, INTS1, INTS4, LARP7, LSM2, LSM3, LSM4, LSM5, MRPS11, NELFE, NOP14, NPM3, PABPC1L, POLR2G, PPIH, PPIL1, PRPF31, PRPF8, RAVER1, RBFA, RBM10, RPS13, SF3B2, SNRNP25, SNRNP35, SNRPA, SNRPA1, SON, SRRM1, SRSF2, TBL3, TFIP11, THOC3, THOC5, THRAP3, TRMU, TRPT1, TRUB2, TSEN54, TXNL4A, URM1, WDR33, ZB…	0.00041515	GO:0016772	transferase activity, transferring phosphorus-containing groups	[Group2]	[AASDHPPT, ACVR2B, ADRBK1, AK2, AURKA, AURKAIP1, BTK, CDK2, CDK4, CDK6, CHKA, CLK2, CLK3, CSK, CSNK1D, CSNK1G2, CSNK2A1, CSNK2B, DOLK, DTYMK, FASTKD2, FES, GAK, GALK2, GRK6, GTF2H4, HK1, LIMK2, MAP3K4, MAPKAPK3, MAPKAPK5, MELK, MNAT1, NME6, PFKL, PGK1, PI4K2A, PIGO, PIP4K2C, POLE3, POLE4, POLR2E, POLR2G, POLR2H, POLR2J, POLR2L, POLR3A, POLR3B, POLR3H, PRKCB, RPAP1, RPS6KB2, SCYL1, SEPHS1, SNX15, …	0.0455093	REACTOME:6985543	Regulation of DNA replication	[Group3]	[CDK2, GMNN, MCM6, ORC6, PSMB1, PSMB2, PSMB5, PSMB6, PSMB8, PSMC1, PSMC3, PSMC4, PSMC5, PSMD1, PSMD2, PSMD3, PSMD4, PSMD8, PSMD9, PSME2]	2.79455e-06
GO:0009156	ribonucleoside monophosphate biosynthetic process	[Group0]	[AK2, APRT, ATP5A1, ATP5C1, ATP5F1, ATP5G1, ATP5G3, ATP5J, ATP5J2, HPRT1, STOML2, UCK2, UCKL1, VCP]	0.000743308	GO:0097027	ubiquitin-protein transferase activator activity	[Group8]	[AUP1, CBX8, RING1]	0.0468919	REACTOME:6985920	APC/C-mediated degradation of cell cycle proteins	[Group3]	[ANAPC10, ANAPC5, AURKA, BUB3, CDK2, PSMB1, PSMB2, PSMB5, PSMB6, PSMB8, PSMC1, PSMC3, PSMC4, PSMC5, PSMD1, PSMD2, PSMD3, PSMD4, PSMD8, PSMD9, PSME2]	2.90359e-06
GO:0046128	purine ribonucleoside metabolic process	[Group0]	[AK2, APIP, APRT, ATP5A1, ATP5C1, ATP5F1, ATP5G1, ATP5G3, ATP5J, ATP5J2, BAD, COX5A, COX7A2L, ENO1, HK1, HPRT1, NCOR1, NDUFAB1, NDUFB8, NDUFB9, NME6, PFKL, PGAM1, PGK1, RHOQ, SIRT6, STOML2, UQCR10, UQCRB, VCP]	0.000819407	GO:0003682	chromatin binding	[Group10]	[ACTL6A, ACTN4, ASF1A, C18H19orf40, CHD4, CSNK2B, DDX1, DNMT1, DNMT3A, ENY2, ERCC6, HINFP, HIST1H1C, MBD2, MTA3, PBRM1, PCNA, PHF12, POLR3A, PRKCB, RING1, RPA1, SIRT6, SIRT7, SMARCA4, SMARCC1, SSBP1, SSRP1, SUZ12, TADA2B, TNRC18, TRIM37]	0.0497721	REACTOME:6985921	Regulation of mitotic cell cycle	[Group3]	[ANAPC10, ANAPC5, AURKA, BUB3, CDK2, PSMB1, PSMB2, PSMB5, PSMB6, PSMB8, PSMC1, PSMC3, PSMC4, PSMC5, PSMD1, PSMD2, PSMD3, PSMD4, PSMD8, PSMD9, PSME2]	2.90359e-06
GO:0042278	purine nucleoside metabolic process	[Group0]	[AK2, APIP, APRT, ATP5A1, ATP5C1, ATP5F1, ATP5G1, ATP5G3, ATP5J, ATP5J2, BAD, COX5A, COX7A2L, ENO1, HK1, HPRT1, NCOR1, NDUFAB1, NDUFB8, NDUFB9, NME6, PFKL, PGAM1, PGK1, RHOQ, SIRT6, STOML2, UQCR10, UQCRB, VCP]	0.00097031						REACTOME:6985536	Assembly of the pre-replicative complex	[Group3]	[GMNN, MCM6, ORC6, PSMB1, PSMB2, PSMB5, PSMB6, PSMB8, PSMC1, PSMC3, PSMC4, PSMC5, PSMD1, PSMD2, PSMD3, PSMD4, PSMD8, PSMD9, PSME2]	2.92649e-06
GO:0006397	mRNA processing	[Group3]	[ACIN1, CPSF3, DAZAP1, DCPS, DDX1, GEMIN2, LSM2, LSM3, LSM4, LSM5, NELFE, PABPC1L, POLR2G, PPIH, PPIL1, PRPF31, PRPF8, RAVER1, RBM10, SF3B2, SNRNP25, SNRNP35, SNRPA, SNRPA1, SON, SRRM1, SRSF2, TFIP11, THOC3, THOC5, THRAP3, TXNL4A, WDR33, ZMAT2, ZMAT5]	0.00133709						REACTOME:6985548	S Phase	[Group3]	[CDK2, CDK4, GINS3, MCM6, MNAT1, ORC6, PCNA, PSMB1, PSMB2, PSMB5, PSMB6, PSMB8, PSMC1, PSMC3, PSMC4, PSMC5, PSMD1, PSMD2, PSMD3, PSMD4, PSMD8, PSMD9, PSME2, RFC3, RPA1, RPA2]	3.14357e-06
GO:0009124	nucleoside monophosphate biosynthetic process	[Group0]	[AK2, APRT, ATP5A1, ATP5C1, ATP5F1, ATP5G1, ATP5G3, ATP5J, ATP5J2, HPRT1, STOML2, UCK2, UCKL1, VCP]	0.00188438						REACTOME:6986499	AUF1 (hnRNP D0) binds and destabilizes mRNA	[Group3]	[HNRNPD, PSMB1, PSMB2, PSMB5, PSMB6, PSMB8, PSMC1, PSMC3, PSMC4, PSMC5, PSMD1, PSMD2, PSMD3, PSMD4, PSMD8, PSMD9, PSME2]	4.10532e-06
GO:0009163	nucleoside biosynthetic process	[Group0]	[AK2, APRT, ATP5A1, ATP5C1, ATP5F1, ATP5G1, ATP5G3, ATP5J, ATP5J2, CTPS2, HPRT1, NME6, STOML2, UCK2, UCKL1, VCP]	0.00267346						REACTOME:6986070	APC/C:Cdh1 mediated degradation of Cdc20 and other APC/C:Cdh1 targeted proteins in late mitosis/early G1	[Group3]	[ANAPC10, ANAPC5, AURKA, PSMB1, PSMB2, PSMB5, PSMB6, PSMB8, PSMC1, PSMC3, PSMC4, PSMC5, PSMD1, PSMD2, PSMD3, PSMD4, PSMD8, PSMD9, PSME2]	4.13065e-06
GO:0042455	ribonucleoside biosynthetic process	[Group0]	[AK2, APRT, ATP5A1, ATP5C1, ATP5F1, ATP5G1, ATP5G3, ATP5J, ATP5J2, CTPS2, HPRT1, NME6, STOML2, UCK2, UCKL1, VCP]	0.00267346						REACTOME:6986071	Cdc20:Phospho-APC/C mediated degradation of Cyclin A	[Group3]	[ANAPC10, ANAPC5, BUB3, PSMB1, PSMB2, PSMB5, PSMB6, PSMB8, PSMC1, PSMC3, PSMC4, PSMC5, PSMD1, PSMD2, PSMD3, PSMD4, PSMD8, PSMD9, PSME2]	4.13065e-06
GO:1901659	glycosyl compound biosynthetic process	[Group0]	[AK2, APRT, ATP5A1, ATP5C1, ATP5F1, ATP5G1, ATP5G3, ATP5J, ATP5J2, CTPS2, HPRT1, NME6, STOML2, UCK2, UCKL1, VCP]	0.00267346						REACTOME:6986072	APC:Cdc20 mediated degradation of cell cycle proteins prior to satisfation of the cell cycle checkpoint	[Group3]	[ANAPC10, ANAPC5, BUB3, PSMB1, PSMB2, PSMB5, PSMB6, PSMB8, PSMC1, PSMC3, PSMC4, PSMC5, PSMD1, PSMD2, PSMD3, PSMD4, PSMD8, PSMD9, PSME2]	4.13065e-06
GO:0009127	purine nucleoside monophosphate biosynthetic process	[Group0]	[AK2, APRT, ATP5A1, ATP5C1, ATP5F1, ATP5G1, ATP5G3, ATP5J, ATP5J2, HPRT1, STOML2, VCP]	0.00268141						REACTOME:6985550	G1/S Transition	[Group3]	[CDK2, MCM6, MNAT1, ORC6, PCNA, PPP2R1B, PSMB1, PSMB2, PSMB5, PSMB6, PSMB8, PSMC1, PSMC3, PSMC4, PSMC5, PSMD1, PSMD2, PSMD3, PSMD4, PSMD8, PSMD9, PSME2, RPA1, RPA2]	4.15254e-06
GO:0009168	purine ribonucleoside monophosphate biosynthetic process	[Group0]	[AK2, APRT, ATP5A1, ATP5C1, ATP5F1, ATP5G1, ATP5G3, ATP5J, ATP5J2, HPRT1, STOML2, VCP]	0.00268141						REACTOME:6986068	Autodegradation of Cdh1 by Cdh1:APC/C	[Group3]	[ANAPC10, ANAPC5, PSMB1, PSMB2, PSMB5, PSMB6, PSMB8, PSMC1, PSMC3, PSMC4, PSMC5, PSMD1, PSMD2, PSMD3, PSMD4, PSMD8, PSMD9, PSME2]	4.33342e-06
GO:0015985	energy coupled proton transport, down electrochemical gradient	[Group0]	[ATP5A1, ATP5C1, ATP5F1, ATP5G1, ATP5G3, ATP5J, STOML2]	0.00272057						REACTOME:6985553	Orc1 removal from chromatin	[Group3]	[CDK2, MCM6, ORC6, PSMB1, PSMB2, PSMB5, PSMB6, PSMB8, PSMC1, PSMC3, PSMC4, PSMC5, PSMD1, PSMD2, PSMD3, PSMD4, PSMD8, PSMD9, PSME2]	4.50275e-06
GO:0015986	ATP synthesis coupled proton transport	[Group0]	[ATP5A1, ATP5C1, ATP5F1, ATP5G1, ATP5G3, ATP5J, STOML2]	0.00272057						REACTOME:6985554	Switching of origins to a post-replicative state	[Group3]	[CDK2, MCM6, ORC6, PSMB1, PSMB2, PSMB5, PSMB6, PSMB8, PSMC1, PSMC3, PSMC4, PSMC5, PSMD1, PSMD2, PSMD3, PSMD4, PSMD8, PSMD9, PSME2]	4.50275e-06
GO:0006754	ATP biosynthetic process	[Group0]	[ATP5A1, ATP5C1, ATP5F1, ATP5G1, ATP5G3, ATP5J, ATP5J2, STOML2, VCP]	0.00288485						REACTOME:6986073	APC/C:Cdc20 mediated degradation of mitotic proteins	[Group3]	[ANAPC10, ANAPC5, BUB3, PSMB1, PSMB2, PSMB5, PSMB6, PSMB8, PSMC1, PSMC3, PSMC4, PSMC5, PSMD1, PSMD2, PSMD3, PSMD4, PSMD8, PSMD9, PSME2]	4.50275e-06
GO:1902600	hydrogen ion transmembrane transport	[Group0]	[ATP5A1, ATP5C1, ATP5F1, ATP5G1, ATP5G3, ATP5J, ATP6V0B, ATP6V1E1, COX5A, COX6B1, COX7A2, COX7A2L, STOML2, UQCRFS1]	0.00293333						REACTOME:6985919	Regulation of APC/C activators between G1/S and early anaphase	[Group3]	[ANAPC10, ANAPC5, BUB3, CDK2, PSMB1, PSMB2, PSMB5, PSMB6, PSMB8, PSMC1, PSMC3, PSMC4, PSMC5, PSMD1, PSMD2, PSMD3, PSMD4, PSMD8, PSMD9, PSME2]	5.32446e-06
GO:0006412	translation	[Group5]	[AARS2, AARSD1, CDC123, EEF1D, EIF1AX, EIF3I, EIF4B, EIF4E2, EIF4H, HNRNPD, ICT1, IREB2, KARS, KHDRBS1, MAPKAPK5, MRPL10, MRPL12, MRPL18, MRPL2, MRPL21, MRPL24, MRPL27, MRPL37, MRPL41, MRPL51, MRPS11, MRPS15, MRPS16, MRPS23, MRPS24, MRPS25, MRPS30, MRPS5, MRPS7, MTG1, MTIF2, POLR2G, RPS13, RPS6KB2, RQCD1, SARS2, SLC25A17, SLC25A26, SLC25A29, SLC25A3, SYNCRIP, TRAP1, TRNAU1AP, TUFM, VWA1]	0.00298795						REACTOME:6986077	APC/C:Cdc20 mediated degradation of Securin	[Group3]	[ANAPC10, ANAPC5, PSMB1, PSMB2, PSMB5, PSMB6, PSMB8, PSMC1, PSMC3, PSMC4, PSMC5, PSMD1, PSMD2, PSMD3, PSMD4, PSMD8, PSMD9, PSME2]	5.34375e-06
GO:0015992	proton transport	[Group0]	[ATP5A1, ATP5C1, ATP5F1, ATP5G1, ATP5G3, ATP5J, ATP5J2, ATP6V0B, ATP6V1E1, COX5A, COX6B1, COX7A2, COX7A2L, SLC9A3R1, STOML2, UQCRFS1]	0.00310873						REACTOME:6986074	Activation of APC/C and APC/C:Cdc20 mediated degradation of mitotic proteins	[Group3]	[ANAPC10, ANAPC5, BUB3, PSMB1, PSMB2, PSMB5, PSMB6, PSMB8, PSMC1, PSMC3, PSMC4, PSMC5, PSMD1, PSMD2, PSMD3, PSMD4, PSMD8, PSMD9, PSME2]	5.46092e-06
GO:0000338	protein deneddylation	[Group1]	[COPS3, COPS4, COPS5, GPS1, TOR1A]	0.00318533						REACTOME:6985566	p53-Dependent G1 DNA Damage Response	[Group3]	[CDK2, PSMB1, PSMB2, PSMB5, PSMB6, PSMB8, PSMC1, PSMC3, PSMC4, PSMC5, PSMD1, PSMD2, PSMD3, PSMD4, PSMD8, PSMD9, PSME2]	5.49869e-06
GO:0006818	hydrogen transport	[Group0]	[ATP5A1, ATP5C1, ATP5F1, ATP5G1, ATP5G3, ATP5J, ATP5J2, ATP6V0B, ATP6V1E1, COX5A, COX6B1, COX7A2, COX7A2L, SLC9A3R1, STOML2, UQCRFS1]	0.00332214						REACTOME:6985567	p53-Dependent G1/S DNA damage checkpoint	[Group3]	[CDK2, PSMB1, PSMB2, PSMB5, PSMB6, PSMB8, PSMC1, PSMC3, PSMC4, PSMC5, PSMD1, PSMD2, PSMD3, PSMD4, PSMD8, PSMD9, PSME2]	5.49869e-06
GO:0009145	purine nucleoside triphosphate biosynthetic process	[Group0]	[ATP5A1, ATP5C1, ATP5F1, ATP5G1, ATP5G3, ATP5J, ATP5J2, NME6, STOML2, VCP]	0.00333799						REACTOME:6986108	SCF(Skp2)-mediated degradation of p27/p21	[Group3]	[CDK2, PSMB1, PSMB2, PSMB5, PSMB6, PSMB8, PSMC1, PSMC3, PSMC4, PSMC5, PSMD1, PSMD2, PSMD3, PSMD4, PSMD8, PSMD9, PSME2]	5.49869e-06
GO:0009206	purine ribonucleoside triphosphate biosynthetic process	[Group0]	[ATP5A1, ATP5C1, ATP5F1, ATP5G1, ATP5G3, ATP5J, ATP5J2, NME6, STOML2, VCP]	0.00333799						REACTOME:6986825	Hedgehog ligand biogenesis	[Group3]	[PSMB1, PSMB2, PSMB5, PSMB6, PSMB8, PSMC1, PSMC3, PSMC4, PSMC5, PSMD1, PSMD2, PSMD3, PSMD4, PSMD8, PSMD9, PSME2, VCP]	5.49869e-06
GO:0051276	chromosome organization	[Group10]	[ACIN1, ACTL6A, ANAPC10, ARID2, ASF1A, ATG5, AURKA, BAG6, BAZ2A, BRD7, BRD8, BUB3, CARM1, CBX8, CDK2, CENPN, CHD4, CHMP2A, CHMP6, CSNK2A1, DDX1, DNMT1, DNMT3A, EHMT1, ENY2, GPX4, GTF2H4, HDAC8, HIST1H1C, HMGB1, HMGB2, HMGB3, INO80C, ITPA, L3MBTL2, MBD2, MCM6, MSL3, NAP1L4, NCOR1, OTUB1, PHB2, POLE3, POLE4, PRKCB, PSRC1, RBBP7, RING1, RPA1, RPA2, SIRT6, SIRT7, SMARCA4, SMARCC1, SUZ12, TADA2B, TAF1…	0.00465133						REACTOME:6985551	Mitotic G1-G1/S phases	[Group3]	[CDK2, CDK4, CDK6, MCM6, MNAT1, ORC6, PCNA, PPP2R1B, PSMB1, PSMB2, PSMB5, PSMB6, PSMB8, PSMC1, PSMC3, PSMC4, PSMC5, PSMD1, PSMD2, PSMD3, PSMD4, PSMD8, PSMD9, PSME2, RPA1, RPA2]	5.65476e-06
GO:0043043	peptide biosynthetic process	[Group5]	[AARS2, AARSD1, CDC123, EEF1D, EIF1AX, EIF3I, EIF4B, EIF4E2, EIF4H, HNRNPD, ICT1, IREB2, KARS, KHDRBS1, MAPKAPK5, MRPL10, MRPL12, MRPL18, MRPL2, MRPL21, MRPL24, MRPL27, MRPL37, MRPL41, MRPL51, MRPS11, MRPS15, MRPS16, MRPS23, MRPS24, MRPS25, MRPS30, MRPS5, MRPS7, MTG1, MTIF2, POLR2G, RPS13, RPS6KB2, RQCD1, SARS2, SLC25A17, SLC25A26, SLC25A29, SLC25A3, SYNCRIP, TRAP1, TRNAU1AP, TUFM, VWA1]	0.00586022						REACTOME:6986593	Activation of NF-kappaB in B cells	[Group3]	[IKBKG, PRKCB, PSMB1, PSMB2, PSMB5, PSMB6, PSMB8, PSMC1, PSMC3, PSMC4, PSMC5, PSMD1, PSMD2, PSMD3, PSMD4, PSMD8, PSMD9, PSME2]	5.88167e-06
GO:0010467	gene expression	[Group2]	[AARS2, AARSD1, ACIN1, ACVR2B, ADRM1, AKNA, APOBEC3A, ARID2, ARID3B, ASF1A, ATF7, ATG4D, BAD, BAK1, BAZ2A, BCL2, BRD7, C3, CARM1, CASP2, CASP9, CBX8, CDC123, CDC37, CDK2, CDK4, CDK6, CHCHD3, CHD4, CLK2, CLK3, CLU, COPS5, CPSF3, CPSF3L, CSNK1D, CSNK2A1, DAZAP1, DCPS, DDX1, DNAJA3, DNMT1, DNMT3A, DRAP1, DUS1L, EEF1D, EHMT1, EIF1AX, EIF3I, EIF4B, EIF4E2, EIF4H, ENY2, ERCC6, ERI2, ERP29, EXOSC4, GAS2…	0.0092752						REACTOME:6985573	p53-Independent DNA Damage Response	[Group3]	[PSMB1, PSMB2, PSMB5, PSMB6, PSMB8, PSMC1, PSMC3, PSMC4, PSMC5, PSMD1, PSMD2, PSMD3, PSMD4, PSMD8, PSMD9, PSME2]	5.97534e-06
GO:0006367	transcription initiation from RNA polymerase II promoter	[Group9]	[GTF2E2, GTF2F1, HMGB1, MED30, POLR2G, PSMC1, PSMC3, PSMC4, PSMC5, TAF6, THRAP3]	0.00990045						REACTOME:6985574	p53-Independent G1/S DNA damage checkpoint	[Group3]	[PSMB1, PSMB2, PSMB5, PSMB6, PSMB8, PSMC1, PSMC3, PSMC4, PSMC5, PSMD1, PSMD2, PSMD3, PSMD4, PSMD8, PSMD9, PSME2]	5.97534e-06
GO:0016071	mRNA metabolic process	[Group3]	[ACIN1, CPSF3, DAZAP1, DCPS, DDX1, EXOSC4, GEMIN2, LSM2, LSM3, LSM4, LSM5, NELFE, PABPC1L, POLR2G, PPIH, PPIL1, PRPF31, PRPF8, RAVER1, RBM10, RQCD1, SF3B2, SNRNP25, SNRNP35, SNRPA, SNRPA1, SON, SRRM1, SRSF2, TFIP11, THOC3, THOC5, THRAP3, TXNL4A, WDR33, ZMAT2, ZMAT5]	0.0105062						REACTOME:6985575	Ubiquitin Mediated Degradation of Phosphorylated Cdc25A	[Group3]	[PSMB1, PSMB2, PSMB5, PSMB6, PSMB8, PSMC1, PSMC3, PSMC4, PSMC5, PSMD1, PSMD2, PSMD3, PSMD4, PSMD8, PSMD9, PSME2]	5.97534e-06
GO:0010918	positive regulation of mitochondrial membrane potential	[Group8]	[BAD, STOML2, VCP]	0.0106562						REACTOME:6986286	Autodegradation of the E3 ubiquitin ligase COP1	[Group3]	[PSMB1, PSMB2, PSMB5, PSMB6, PSMB8, PSMC1, PSMC3, PSMC4, PSMC5, PSMD1, PSMD2, PSMD3, PSMD4, PSMD8, PSMD9, PSME2]	5.97534e-06
GO:0045838	positive regulation of membrane potential	[Group8]	[BAD, STOML2, VCP]	0.0106562						REACTOME:6985562	Cyclin E associated events during G1/S transition	[Group3]	[CDK2, MNAT1, PSMB1, PSMB2, PSMB5, PSMB6, PSMB8, PSMC1, PSMC3, PSMC4, PSMC5, PSMD1, PSMD2, PSMD3, PSMD4, PSMD8, PSMD9, PSME2]	7.30004e-06
GO:0043604	amide biosynthetic process	[Group5]	[AARS2, AARSD1, ARG1, CDC123, CERS2, EEF1D, EIF1AX, EIF3I, EIF4B, EIF4E2, EIF4H, HNRNPD, ICT1, IREB2, KARS, KHDRBS1, MAPKAPK5, MRPL10, MRPL12, MRPL18, MRPL2, MRPL21, MRPL24, MRPL27, MRPL37, MRPL41, MRPL51, MRPS11, MRPS15, MRPS16, MRPS23, MRPS24, MRPS25, MRPS30, MRPS5, MRPS7, MTG1, MTIF2, POLR2G, RPS13, RPS6KB2, RQCD1, SARS2, SLC25A17, SLC25A26, SLC25A29, SLC25A3, SYNCRIP, TRAP1, TRNAU1AP, TUFM, V…	0.0134465						REACTOME:6985565	Stabilization of p53	[Group3]	[PSMB1, PSMB2, PSMB5, PSMB6, PSMB8, PSMC1, PSMC3, PSMC4, PSMC5, PSMD1, PSMD2, PSMD3, PSMD4, PSMD8, PSMD9, PSME2]	7.74982e-06
GO:0042451	purine nucleoside biosynthetic process	[Group0]	[AK2, APRT, ATP5A1, ATP5C1, ATP5F1, ATP5G1, ATP5G3, ATP5J, ATP5J2, HPRT1, NME6, STOML2, VCP]	0.0147346						REACTOME:6985568	G1/S DNA Damage Checkpoints	[Group3]	[CDK2, PSMB1, PSMB2, PSMB5, PSMB6, PSMB8, PSMC1, PSMC3, PSMC4, PSMC5, PSMD1, PSMD2, PSMD3, PSMD4, PSMD8, PSMD9, PSME2]	8.51432e-06
GO:0046129	purine ribonucleoside biosynthetic process	[Group0]	[AK2, APRT, ATP5A1, ATP5C1, ATP5F1, ATP5G1, ATP5G3, ATP5J, ATP5J2, HPRT1, NME6, STOML2, VCP]	0.0147346						REACTOME:6986604	Antigen processing-Cross presentation	[Group3]	[CYBB, PSMB1, PSMB2, PSMB5, PSMB6, PSMB8, PSMC1, PSMC3, PSMC4, PSMC5, PSMD1, PSMD2, PSMD3, PSMD4, PSMD8, PSMD9, PSME2]	8.51432e-06
GO:0034641	cellular nitrogen compound metabolic process	[Group2]	[AARS2, AARSD1, ACIN1, ACTN4, ACVR2B, ADRM1, AK2, AKNA, APEX2, APIP, APOBEC3A, APRT, ARG1, ARID2, ARID3B, ASF1A, ATF7, ATG5, ATP5A1, ATP5C1, ATP5F1, ATP5G1, ATP5G3, ATP5J, ATP5J2, BAD, BAZ2A, BRD7, C18H19orf40, CARM1, CBX8, CDC123, CDK2, CERS2, CHCHD3, CHD4, CHKA, CLK2, CLK3, CLU, COPS5, COX5A, COX7A2L, CPSF3, CPSF3L, CSNK2A1, CTPS2, DAZAP1, DCPS, DDX1, DDX42, DNAJA3, DNMT1, DNMT3A, DRAP1, DTYMK,…	0.0154341						REACTOME:6986836	Dectin-1 mediated noncanonical NF-kB signaling	[Group3]	[PSMB1, PSMB2, PSMB5, PSMB6, PSMB8, PSMC1, PSMC3, PSMC4, PSMC5, PSMD1, PSMD2, PSMD3, PSMD4, PSMD8, PSMD9, PSME2, UBE2M]	8.51432e-06
GO:0045898	regulation of RNA polymerase II transcriptional preinitiation complex assembly	[Group6, Group9]	[HMGB1, PSMC1, PSMC3, PSMC4, PSMC5]	0.0156112						REACTOME:6986837	NIK--&gt;noncanonical NF-kB signaling	[Group3]	[PSMB1, PSMB2, PSMB5, PSMB6, PSMB8, PSMC1, PSMC3, PSMC4, PSMC5, PSMD1, PSMD2, PSMD3, PSMD4, PSMD8, PSMD9, PSME2, UBE2M]	8.51432e-06
GO:0044260	cellular macromolecule metabolic process	[Group2]	[AARS2, AARSD1, AASDHPPT, ACIN1, ACP1, ACTL6A, ACTN4, ACVR2B, ADRBK1, ADRM1, AKNA, AKT1S1, ANAPC10, ANAPC5, APEX2, APIP, APOBEC3A, ARFGEF2, ARID2, ARID3B, ASF1A, ATF7, ATG3, ATG4D, ATG5, AUP1, AURKA, AURKAIP1, B3GAT3, BAD, BAG6, BAK1, BAZ2A, BCL2, BRD7, BRD8, BTK, C18H19orf40, C3, CACUL1, CARM1, CASP2, CASP9, CBX8, CDC123, CDC37, CDK2, CDK4, CDK6, CFL1, CHCHD3, CHD4, CLK2, CLK3, CLU, CNPPD1, COPS…	0.0156114						REACTOME:6986067	Cyclin A:Cdk2-associated events at S phase entry	[Group3]	[CDK2, MNAT1, PSMB1, PSMB2, PSMB5, PSMB6, PSMB8, PSMC1, PSMC3, PSMC4, PSMC5, PSMD1, PSMD2, PSMD3, PSMD4, PSMD8, PSMD9, PSME2]	8.76106e-06
GO:0010388	cullin deneddylation	[Group1]	[COPS3, COPS4, COPS5, GPS1]	0.0189627						REACTOME:6986796	Degradation of AXIN	[Group3]	[PSMB1, PSMB2, PSMB5, PSMB6, PSMB8, PSMC1, PSMC3, PSMC4, PSMC5, PSMD1, PSMD2, PSMD3, PSMD4, PSMD8, PSMD9, PSME2]	9.69758e-06
GO:0030433	ER-associated ubiquitin-dependent protein catabolic process	[Group6, Group9]	[AUP1, EDEM2, PSMC1, PSMC3, PSMC4, PSMC5, SGTA, STT3B, TOR1A, UFD1L, VCP]	0.020286						REACTOME:6986808	Asymmetric localization of PCP proteins	[Group3]	[PSMB1, PSMB2, PSMB5, PSMB6, PSMB8, PSMC1, PSMC3, PSMC4, PSMC5, PSMD1, PSMD2, PSMD3, PSMD4, PSMD8, PSMD9, PSME2]	9.69758e-06
GO:0000377	RNA splicing, via transesterification reactions with bulged adenosine as nucleophile	[Group3]	[ACIN1, DAZAP1, DCPS, GEMIN2, LSM2, LSM3, LSM4, LSM5, PRPF31, PRPF8, RAVER1, RBM10, SF3B2, SNRNP35, SNRPA, SNRPA1, SRSF2, TFIP11, THRAP3, TXNL4A, ZMAT2]	0.0204841						REACTOME:6986583	Antigen processing: Ubiquitination &amp; Proteasome degradation	[Group3]	[PSMB1, PSMB2, PSMB5, PSMB6, PSMB8, PSMC1, PSMC3, PSMC4, PSMC5, PSMD1, PSMD2, PSMD3, PSMD4, PSMD8, PSMD9, PSME2, UBA1]	1.04129e-05
GO:0000398	mRNA splicing, via spliceosome	[Group3]	[ACIN1, DAZAP1, DCPS, GEMIN2, LSM2, LSM3, LSM4, LSM5, PRPF31, PRPF8, RAVER1, RBM10, SF3B2, SNRNP35, SNRPA, SNRPA1, SRSF2, TFIP11, THRAP3, TXNL4A, ZMAT2]	0.0204841						REACTOME:6985972	Respiratory electron transport	[Group11]	[COX5A, COX6B1, COX7A2L, CYC1, NDUFA9, NDUFAB1, NDUFB1, NDUFB2, NDUFB3, NDUFB4, NDUFB8, NDUFB9, NDUFC1, NDUFS6, NDUFV3, UQCR10, UQCRB, UQCRFS1]	1.05282e-05
GO:1901566	organonitrogen compound biosynthetic process	[Group5]	[AARS2, AARSD1, AASDHPPT, AK2, APIP, APRT, ARG1, ATP5A1, ATP5C1, ATP5F1, ATP5G1, ATP5G3, ATP5J, ATP5J2, B3GAT3, CDC123, CERS2, CHKA, CTPS2, DTYMK, EEF1D, EIF1AX, EIF3I, EIF4B, EIF4E2, EIF4H, ERH, HNRNPD, HPRT1, ICT1, IREB2, KARS, KHDRBS1, MAPKAPK5, MRPL10, MRPL12, MRPL18, MRPL2, MRPL21, MRPL24, MRPL27, MRPL37, MRPL41, MRPL51, MRPS11, MRPS15, MRPS16, MRPS23, MRPS24, MRPS25, MRPS30, MRPS5, MRPS7, M…	0.0205628						REACTOME:6986371	MAPK6/MAPK4 signaling	[Group3]	[CDC42EP2, MAPKAPK5, PSMB1, PSMB2, PSMB5, PSMB6, PSMB8, PSMC1, PSMC3, PSMC4, PSMC5, PSMD1, PSMD2, PSMD3, PSMD4, PSMD8, PSMD9, PSME2]	1.05282e-05
GO:0000375	RNA splicing, via transesterification reactions	[Group3]	[ACIN1, DAZAP1, DCPS, GEMIN2, LSM2, LSM3, LSM4, LSM5, PRPF31, PRPF8, RAVER1, RBM10, SF3B2, SNRNP35, SNRPA, SNRPA1, SRSF2, TFIP11, THRAP3, TXNL4A, ZMAT2]	0.0215937						REACTOME:6986081	SCF-beta-TrCP mediated degradation of Emi1	[Group3]	[PSMB1, PSMB2, PSMB5, PSMB6, PSMB8, PSMC1, PSMC3, PSMC4, PSMC5, PSMD1, PSMD2, PSMD3, PSMD4, PSMD8, PSMD9, PSME2]	1.21128e-05
GO:0036503	ERAD pathway	[Group6, Group9]	[AUP1, BAG6, EDEM2, PSMC1, PSMC3, PSMC4, PSMC5, SGTA, STT3B, TOR1A, UFD1L, VCP]	0.0219971						REACTOME:6986840	Degradation of GLI1 by the proteasome	[Group3]	[PSMB1, PSMB2, PSMB5, PSMB6, PSMB8, PSMC1, PSMC3, PSMC4, PSMC5, PSMD1, PSMD2, PSMD3, PSMD4, PSMD8, PSMD9, PSME2]	1.21128e-05
GO:0043161	proteasome-mediated ubiquitin-dependent protein catabolic process	[Group6]	[ANAPC10, AUP1, AURKA, BAG6, CLU, CSNK1D, CSNK2A1, EDEM2, FBXW12, NSFL1C, PSMB5, PSMC1, PSMC3, PSMC4, PSMC5, PSMD1, PSMD2, PSMD4, PSMD8, RFFL, RNF34, SGTA, SMARCC1, STT3B, TOR1A, UBE2R2, UFD1L, USP5, VCP, ZW10]	0.0222514						REACTOME:6986838	GLI3 is processed to GLI3R by the proteasome	[Group3]	[PSMB1, PSMB2, PSMB5, PSMB6, PSMB8, PSMC1, PSMC3, PSMC4, PSMC5, PSMD1, PSMD2, PSMD3, PSMD4, PSMD8, PSMD9, PSME2]	1.58848e-05
GO:0006518	peptide metabolic process	[Group5]	[AARS2, AARSD1, CDC123, EEF1D, EIF1AX, EIF3I, EIF4B, EIF4E2, EIF4H, ETHE1, GSTO1, HNRNPD, ICT1, IREB2, KARS, KHDRBS1, MAPKAPK5, MRPL10, MRPL12, MRPL18, MRPL2, MRPL21, MRPL24, MRPL27, MRPL37, MRPL41, MRPL51, MRPS11, MRPS15, MRPS16, MRPS23, MRPS24, MRPS25, MRPS30, MRPS5, MRPS7, MTG1, MTIF2, POLR2G, RPS13, RPS6KB2, RQCD1, SARS2, SLC25A17, SLC25A26, SLC25A29, SLC25A3, SPCS1, SYNCRIP, TRAP1, TRNAU1AP,…	0.0223567						REACTOME:6986496	Regulation of mRNA stability by proteins that bind AU-rich elements	[Group3]	[EXOSC4, HNRNPD, PSMB1, PSMB2, PSMB5, PSMB6, PSMB8, PSMC1, PSMC3, PSMC4, PSMC5, PSMD1, PSMD2, PSMD3, PSMD4, PSMD8, PSMD9, PSME2, TNFSF13]	2.52566e-05
GO:0006352	DNA-templated transcription, initiation	[Group9]	[GTF2E2, GTF2F1, HMGB1, MED30, POLR2G, POLR3H, PSMC1, PSMC3, PSMC4, PSMC5, TAF10, TAF6, THRAP3]	0.023852						REACTOME:6986904	Transcription-Coupled Nucleotide Excision Repair (TC-NER)	[Group8]	[COPS3, COPS4, COPS5, ERCC6, GPS1, GTF2H4, MNAT1, PCNA, POLR2E, POLR2G, POLR2H, POLR2J, POLR2L, RFC3, RPA1, RPA2, USP7]	2.63713e-05
GO:0044267	cellular protein metabolic process	[Group2]	[AARS2, AARSD1, AASDHPPT, ACP1, ACTL6A, ACVR2B, ADRBK1, ADRM1, AKT1S1, ANAPC10, ANAPC5, APIP, ATG3, ATG4D, ATG5, AUP1, AURKA, AURKAIP1, BAD, BAG6, BAK1, BAZ2A, BCL2, BRD7, BRD8, BTK, C3, CACUL1, CARM1, CASP2, CASP9, CBX8, CDC123, CDC37, CDK2, CDK4, CDK6, CFL1, CLK2, CLK3, CLU, CNPPD1, COPS3, COPS4, COPS5, CSK, CSNK1D, CSNK1G2, CSNK2A1, CSNK2B, CTDNEP1, DCAF4, DNAJA3, DNMT1, DPM2, EDEM2, EEF1D, EH…	0.0274076						REACTOME:6986661	Degradation of DVL	[Group3]	[PSMB1, PSMB2, PSMB5, PSMB6, PSMB8, PSMC1, PSMC3, PSMC4, PSMC5, PSMD1, PSMD2, PSMD3, PSMD4, PSMD8, PSMD9, PSME2]	2.66766e-05
GO:0032075	positive regulation of nuclease activity	[Group4]	[HMGB2, PARP16, PCNA]	0.0276239						REACTOME:6985539	Cell Cycle, Mitotic	[Group3]	[AAAS, ANAPC10, ANAPC5, AURKA, BUB3, CDK2, CDK4, CDK6, CENPN, CSNK1D, CSNK2A1, CSNK2B, CTDNEP1, EMD, GINS3, GMNN, HDAC8, MCM6, MNAT1, NUP188, NUP37, NUP43, ORC6, PCNA, PPP2R1B, PRKCB, PSMB1, PSMB2, PSMB5, PSMB6, PSMB8, PSMC1, PSMC3, PSMC4, PSMC5, PSMD1, PSMD2, PSMD3, PSMD4, PSMD8, PSMD9, PSME2, RFC3, RPA1, RPA2, TUBA4A, TUBGCP2, ZW10, ZWILCH]	3.29285e-05
GO:0006325	chromatin organization	[Group10]	[ACTL6A, ARID2, ASF1A, ATG5, AURKA, BAZ2A, BRD7, BRD8, CARM1, CBX8, CDK2, CHD4, DNMT1, DNMT3A, EHMT1, ENY2, GPX4, HDAC8, HIST1H1C, HMGB1, HMGB2, INO80C, L3MBTL2, MBD2, MSL3, NAP1L4, NCOR1, OTUB1, POLE3, POLE4, PRKCB, RBBP7, RING1, SIRT6, SIRT7, SMARCA4, SMARCC1, SUZ12, TADA2B, TAF10, TNRC18, TRIM37, WDR5]	0.0279069						REACTOME:6985645	Processing of Capped Intron-Containing Pre-mRNA	[Group8]	[AAAS, CPSF3, FUS, GTF2F1, HNRNPD, HNRNPR, HNRNPUL1, LSM2, NUP188, NUP37, NUP43, POLR2E, POLR2G, POLR2H, POLR2J, POLR2L, PRPF8, SF3B2, SNRNP25, SNRNP35, SNRPA, SNRPA1, SRRM1, SRSF2, TXNL4A, ZMAT5]	3.43778e-05
GO:0051603	proteolysis involved in cellular protein catabolic process	[Group6]	[ANAPC10, AUP1, AURKA, BAG6, CACUL1, CLU, COPS3, CSNK1D, CSNK2A1, EDEM2, FBXW12, LONP1, NSFL1C, PSMB1, PSMB2, PSMB5, PSMB6, PSMB8, PSMC1, PSMC3, PSMC4, PSMC5, PSMD1, PSMD2, PSMD3, PSMD4, PSMD8, PSME2, RFFL, RNF34, SGTA, SMARCC1, SNF8, STT3B, TOR1A, TTC3, UBA1, UBE2R2, UBE3B, UBE4A, UFD1L, USP5, USP7, VCP, ZW10]	0.0283117						REACTOME:6985647	mRNA Splicing	[Group8]	[CPSF3, FUS, GTF2F1, HNRNPD, HNRNPR, HNRNPUL1, LSM2, POLR2E, POLR2G, POLR2H, POLR2J, POLR2L, PRPF8, SF3B2, SNRNP25, SNRNP35, SNRPA, SNRPA1, SRRM1, SRSF2, TXNL4A, ZMAT5]	3.53217e-05
GO:0000394	RNA splicing, via endonucleolytic cleavage and ligation	[Group12]	[DDX1, TRPT1, TSEN54, ZBTB8OS]	0.0286029						REACTOME:6985610	Metabolism of polyamines	[Group3]	[ARG1, OAZ1, PSMB1, PSMB2, PSMB5, PSMB6, PSMB8, PSMC1, PSMC3, PSMC4, PSMC5, PSMD1, PSMD2, PSMD3, PSMD4, PSMD8, PSMD9, PSME2]	4.70591e-05
GO:0006388	tRNA splicing, via endonucleolytic cleavage and ligation	[Group12]	[DDX1, TRPT1, TSEN54, ZBTB8OS]	0.0286029						REACTOME:6985714	mRNA Splicing - Minor Pathway	[Group8]	[GTF2F1, LSM2, POLR2E, POLR2G, POLR2H, POLR2J, POLR2L, PRPF8, SF3B2, SNRNP25, SNRNP35, SRSF2, TXNL4A, ZMAT5]	6.16542e-05
GO:0045899	positive regulation of RNA polymerase II transcriptional preinitiation complex assembly	[Group6, Group9]	[PSMC1, PSMC3, PSMC4, PSMC5]	0.0286029						REACTOME:6986872	Regulation of RAS by GAPs	[Group3]	[PSMB1, PSMB2, PSMB5, PSMB6, PSMB8, PSMC1, PSMC3, PSMC4, PSMC5, PSMD1, PSMD2, PSMD3, PSMD4, PSMD8, PSMD9, PSME2]	6.20148e-05
GO:0010498	proteasomal protein catabolic process	[Group6]	[ANAPC10, AUP1, AURKA, BAG6, CLU, CSNK1D, CSNK2A1, EDEM2, FBXW12, NSFL1C, PSMB5, PSMC1, PSMC3, PSMC4, PSMC5, PSMD1, PSMD2, PSMD4, PSMD8, PSME2, RFFL, RNF34, SGTA, SMARCC1, STT3B, TOR1A, UBE2R2, UFD1L, USP5, VCP, ZW10]	0.0288087						REACTOME:6985569	Cell Cycle Checkpoints	[Group3]	[ANAPC10, ANAPC5, BUB3, CDK2, MCM6, ORC6, PSMB1, PSMB2, PSMB5, PSMB6, PSMB8, PSMC1, PSMC3, PSMC4, PSMC5, PSMD1, PSMD2, PSMD3, PSMD4, PSMD8, PSMD9, PSME2, RFC3, RPA1, RPA2]	6.25667e-05
GO:0034976	response to endoplasmic reticulum stress	[Group6]	[AUP1, BAG6, BAK1, BCL2, COPS5, EDEM2, ERP29, FLOT1, GRINA, PARP16, PSMC1, PSMC3, PSMC4, PSMC5, SGTA, STT3B, TBL2, TOR1A, UFC1, UFD1L, VCP]	0.0330886						REACTOME:6985794	Nucleotide Excision Repair	[Group8]	[ACTL6A, COPS3, COPS4, COPS5, ERCC6, GPS1, GTF2H4, INO80C, MNAT1, PCNA, POLR2E, POLR2G, POLR2H, POLR2J, POLR2L, RFC3, RPA1, RPA2, USP7]	6.36686e-05
GO:0006383	transcription from RNA polymerase III promoter	[Group11]	[POLR2E, POLR2H, POLR2L, POLR3A, POLR3B, POLR3H, RPTOR]	0.0343922						REACTOME:6986241	CLEC7A (Dectin-1) signaling	[Group3]	[IKBKG, NFATC1, PSMB1, PSMB2, PSMB5, PSMB6, PSMB8, PSMC1, PSMC3, PSMC4, PSMC5, PSMD1, PSMD2, PSMD3, PSMD4, PSMD8, PSMD9, PSME2, UBE2M]	8.77953e-05
GO:0045333	cellular respiration	[Group7]	[CHCHD5, COX5A, CS, DLAT, IDH3A, NDUFA5, NDUFAB1, NDUFB8, NDUFB9, NDUFS6, PRELID1, TRAP1, UQCR10, UQCRB, VCP]	0.0363481						REACTOME:6986799	PCP/CE pathway	[Group3]	[PRKCB, PSMB1, PSMB2, PSMB5, PSMB6, PSMB8, PSMC1, PSMC3, PSMC4, PSMC5, PSMD1, PSMD2, PSMD3, PSMD4, PSMD8, PSMD9, PSME2]	8.89608e-05
GO:0016568	chromatin modification	[Group10]	[ACTL6A, ASF1A, ATG5, AURKA, BAZ2A, BRD7, BRD8, CARM1, CBX8, CDK2, CHD4, DNMT1, DNMT3A, EHMT1, ENY2, HDAC8, HMGB1, HMGB2, INO80C, L3MBTL2, MBD2, MSL3, NCOR1, OTUB1, POLE3, POLE4, PRKCB, RBBP7, RING1, SIRT6, SIRT7, SMARCA4, SMARCC1, SUZ12, TADA2B, TAF10, TNRC18, TRIM37, WDR5]	0.0370192						REACTOME:6986214	TNFR2 non-canonical NF-kB pathway	[Group3]	[PSMB1, PSMB2, PSMB5, PSMB6, PSMB8, PSMC1, PSMC3, PSMC4, PSMC5, PSMD1, PSMD2, PSMD3, PSMD4, PSMD8, PSMD9, PSME2, TNFSF13, UBE2M]	9.66471e-05
GO:0019941	modification-dependent protein catabolic process	[Group6]	[ANAPC10, AUP1, AURKA, BAG6, CACUL1, CLU, COPS3, CSNK1D, CSNK2A1, EDEM2, FBXW12, LONP1, NSFL1C, PSMB5, PSMC1, PSMC3, PSMC4, PSMC5, PSMD1, PSMD2, PSMD3, PSMD4, PSMD8, RFFL, RNF34, SGTA, SMARCC1, SNF8, STT3B, TOR1A, TTC3, UBA1, UBE2R2, UBE3B, UBE4A, UFD1L, USP5, USP7, VCP, ZW10]	0.0384676						REACTOME:6986240	FCERI mediated NF-kB activation	[Group3]	[IKBKG, PSMB1, PSMB2, PSMB5, PSMB6, PSMB8, PSMC1, PSMC3, PSMC4, PSMC5, PSMD1, PSMD2, PSMD3, PSMD4, PSMD8, PSMD9, PSME2]	0.000106575
GO:0009259	ribonucleotide metabolic process	[Group0]	[AK2, APRT, ATP5A1, ATP5C1, ATP5F1, ATP5G1, ATP5G3, ATP5J, ATP5J2, BAD, COX5A, COX7A2L, CTPS2, ENO1, HK1, HPRT1, ITPA, NCOR1, NDUFAB1, NDUFB8, NDUFB9, NME6, PFKL, PGAM1, PGK1, RHOQ, SIRT6, STOML2, UCK2, UCKL1, UQCR10, UQCRB, VCP]	0.0400824						REACTOME:6986903	Formation of TC-NER Pre-Incision Complex	[Group8]	[COPS3, COPS4, COPS5, ERCC6, GPS1, GTF2H4, MNAT1, POLR2E, POLR2G, POLR2H, POLR2J, POLR2L, USP7]	0.000121329
GO:0006996	organelle organization	[Group10]	[AARS2, ACIN1, ACTL6A, ACTN4, ANAPC10, AP3B1, ARFGEF2, ARID2, ARPC1B, ARPC4, ASF1A, ATG3, ATG4D, ATG5, AURKA, BAD, BAG6, BAK1, BAZ2A, BCL2, BCR, BCS1L, BFSP2, BICD2, BRD7, BRD8, BUB3, CAPN10, CAPZB, CARM1, CBX8, CDC37, CDC42EP2, CDK2, CENPN, CFL1, CHCHD3, CHCHD5, CHD4, CHMP2A, CHMP6, CORO1B, CORO2A, COX7A2L, CSNK1D, CSNK2A1, CTDNEP1, DBNL, DDX1, DNAJA3, DNMT1, DNMT3A, EHMT1, ELMO2, ENY2, ERAL1, F…	0.0418211						REACTOME:6986255	Class I MHC mediated antigen processing &amp; presentation	[Group3]	[CYBB, PSMB1, PSMB2, PSMB5, PSMB6, PSMB8, PSMC1, PSMC3, PSMC4, PSMC5, PSMD1, PSMD2, PSMD3, PSMD4, PSMD8, PSMD9, PSME2, SAR1B, UBA1]	0.000142106
GO:0022900	electron transport chain	[Group7]	[COX5A, NDUFA5, NDUFAB1, NDUFB3, NDUFB8, NDUFB9, NDUFS6, UQCR10, UQCRB]	0.0420973						REACTOME:6986079	Mitotic Anaphase	[Group3]	[ANAPC10, ANAPC5, BUB3, CENPN, EMD, HDAC8, NUP37, NUP43, PPP2R1B, PSMB1, PSMB2, PSMB5, PSMB6, PSMB8, PSMC1, PSMC3, PSMC4, PSMC5, PSMD1, PSMD2, PSMD3, PSMD4, PSMD8, PSMD9, PSME2, ZW10, ZWILCH]	0.00014314
GO:0009148	pyrimidine nucleoside triphosphate biosynthetic process	[Group0]	[CTPS2, DTYMK, NME6, UCK2, UCKL1]	0.0491004						REACTOME:6986176	Degradation of beta-catenin by the destruction complex	[Group3]	[PPP2R1B, PSMB1, PSMB2, PSMB5, PSMB6, PSMB8, PSMC1, PSMC3, PSMC4, PSMC5, PSMD1, PSMD2, PSMD3, PSMD4, PSMD8, PSMD9, PSME2]	0.000151267
GO:0043632	modification-dependent macromolecule catabolic process	[Group6]	[ANAPC10, AUP1, AURKA, BAG6, CACUL1, CLU, COPS3, CSNK1D, CSNK2A1, EDEM2, FBXW12, LONP1, NSFL1C, PSMB5, PSMC1, PSMC3, PSMC4, PSMC5, PSMD1, PSMD2, PSMD3, PSMD4, PSMD8, RFFL, RNF34, SGTA, SMARCC1, SNF8, STT3B, TOR1A, TTC3, UBA1, UBE2R2, UBE3B, UBE4A, UFD1L, USP5, USP7, VCP, ZW10]	0.0492348						REACTOME:6985967	Mitotic Metaphase and Anaphase	[Group3]	[ANAPC10, ANAPC5, BUB3, CENPN, EMD, HDAC8, NUP37, NUP43, PPP2R1B, PSMB1, PSMB2, PSMB5, PSMB6, PSMB8, PSMC1, PSMC3, PSMC4, PSMC5, PSMD1, PSMD2, PSMD3, PSMD4, PSMD8, PSMD9, PSME2, ZW10, ZWILCH]	0.000157928
										REACTOME:6985924	M Phase	[Group3]	[AAAS, ANAPC10, ANAPC5, BUB3, CENPN, CSNK2A1, CSNK2B, CTDNEP1, EMD, HDAC8, NUP188, NUP37, NUP43, PPP2R1B, PRKCB, PSMB1, PSMB2, PSMB5, PSMB6, PSMB8, PSMC1, PSMC3, PSMC4, PSMC5, PSMD1, PSMD2, PSMD3, PSMD4, PSMD8, PSMD9, PSME2, ZW10, ZWILCH]	0.000170171
										REACTOME:6986078	Separation of Sister Chromatids	[Group3]	[ANAPC10, ANAPC5, BUB3, CENPN, HDAC8, NUP37, NUP43, PPP2R1B, PSMB1, PSMB2, PSMB5, PSMB6, PSMB8, PSMC1, PSMC3, PSMC4, PSMC5, PSMD1, PSMD2, PSMD3, PSMD4, PSMD8, PSMD9, PSME2, ZW10, ZWILCH]	0.000193466
										REACTOME:6985690	RNA Polymerase II Pre-transcription Events	[Group8]	[GTF2E2, GTF2F1, GTF2H4, MNAT1, NELFE, POLR2E, POLR2G, POLR2H, POLR2J, POLR2L, SSRP1, SUPT4H1, TAF10, TAF6]	0.000235054
										REACTOME:6985986	Formation of ATP by chemiosmotic coupling	[Group11]	[ATP5A1, ATP5C1, ATP5F1, ATP5G1, ATP5G3, ATP5J, ATP5J2]	0.000264237
										REACTOME:6985646	mRNA Splicing - Major Pathway	[Group8]	[CPSF3, FUS, GTF2F1, HNRNPD, HNRNPR, HNRNPUL1, LSM2, POLR2E, POLR2G, POLR2H, POLR2J, POLR2L, PRPF8, SF3B2, SNRPA, SNRPA1, SRRM1, SRSF2, TXNL4A]	0.000301596
										REACTOME:6985540	Cell Cycle	[Group3]	[AAAS, ANAPC10, ANAPC5, AURKA, BUB3, CDK2, CDK4, CDK6, CENPN, CSNK1D, CSNK2A1, CSNK2B, CTDNEP1, EMD, GINS3, GMNN, HDAC8, MCM6, MNAT1, NUP188, NUP37, NUP43, ORC6, PCNA, PPP2R1B, PRKCB, PSMB1, PSMB2, PSMB5, PSMB6, PSMB8, PSMC1, PSMC3, PSMC4, PSMC5, PSMD1, PSMD2, PSMD3, PSMD4, PSMD8, PSMD9, PSME2, RBBP7, RFC3, RPA1, RPA2, TUBA4A, TUBGCP2, ZW10, ZWILCH]	0.000332161
										REACTOME:6986191	Downstream signaling events of B Cell Receptor (BCR)	[Group3]	[AKT1S1, CASP9, IKBKG, MLST8, PRKCB, PSMB1, PSMB2, PSMB5, PSMB6, PSMB8, PSMC1, PSMC3, PSMC4, PSMC5, PSMD1, PSMD2, PSMD3, PSMD4, PSMD8, PSMD9, PSME2, RPS6KB2]	0.000334722
										REACTOME:6985861	Formation of the Early Elongation Complex	[Group8]	[GTF2F1, NELFE, POLR2E, POLR2G, POLR2H, POLR2J, POLR2L, SUPT4H1]	0.000336963
										REACTOME:6986397	Beta-catenin independent WNT signaling	[Group3]	[NFATC1, PRKCB, PSMB1, PSMB2, PSMB5, PSMB6, PSMB8, PSMC1, PSMC3, PSMC4, PSMC5, PSMD1, PSMD2, PSMD3, PSMD4, PSMD8, PSMD9, PSME2]	0.000400958
										REACTOME:6986483	Hedgehog 'on' state	[Group3]	[PSMB1, PSMB2, PSMB5, PSMB6, PSMB8, PSMC1, PSMC3, PSMC4, PSMC5, PSMD1, PSMD2, PSMD3, PSMD4, PSMD8, PSMD9, PSME2]	0.000401335
										REACTOME:6985572	Cellular responses to stress	[Group4]	[AKT1S1, ANAPC10, ANAPC5, ASF1A, ATG3, ATG5, CBX8, CDK2, CDK4, CDK6, CHMP2A, CHMP6, EHMT1, GPX2, GPX7, MAPKAPK3, MAPKAPK5, MLST8, PRDX1, RBBP7, RING1, RPA1, RPA2, RPTOR, SUZ12, TXN2, TXNRD1, VCP, WIPI1, WIPI2]	0.000471729
										REACTOME:6985653	RNA Polymerase II Transcription	[Group8]	[CPSF3, GTF2E2, GTF2F1, GTF2H4, MNAT1, NELFE, POLR2E, POLR2G, POLR2H, POLR2J, POLR2L, SRRM1, SRSF2, SSRP1, SUPT4H1, TAF10, TAF6]	0.000475719
										REACTOME:6986242	C-type lectin receptors (CLRs)	[Group3]	[IKBKG, NFATC1, PSMB1, PSMB2, PSMB5, PSMB6, PSMB8, PSMC1, PSMC3, PSMC4, PSMC5, PSMD1, PSMD2, PSMD3, PSMD4, PSMD8, PSMD9, PSME2, UBE2M]	0.000513463
										REACTOME:6986905	Dual incision in TC-NER	[Group8, Group9]	[ERCC6, GTF2H4, MNAT1, PCNA, POLR2E, POLR2G, POLR2H, POLR2J, POLR2L, RFC3, RPA1, RPA2, USP7]	0.000542819
										REACTOME:6986906	Gap-filling DNA repair synthesis and ligation in TC-NER	[Group8, Group9]	[ERCC6, GTF2H4, MNAT1, PCNA, POLR2E, POLR2G, POLR2H, POLR2J, POLR2L, RFC3, RPA1, RPA2, USP7]	0.000542819
										REACTOME:6985718	RNA Polymerase II Transcription Pre-Initiation And Promoter Opening	[Group8]	[GTF2E2, GTF2F1, GTF2H4, MNAT1, POLR2E, POLR2G, POLR2H, POLR2J, POLR2L, TAF10, TAF6]	0.000580142
										REACTOME:6985729	RNA Polymerase II Promoter Escape	[Group8]	[GTF2E2, GTF2F1, GTF2H4, MNAT1, POLR2E, POLR2G, POLR2H, POLR2J, POLR2L, TAF10, TAF6]	0.000580142
										REACTOME:6985730	RNA Polymerase II Transcription Initiation And Promoter Clearance	[Group8]	[GTF2E2, GTF2F1, GTF2H4, MNAT1, POLR2E, POLR2G, POLR2H, POLR2J, POLR2L, TAF10, TAF6]	0.000580142
										REACTOME:6985732	RNA Polymerase II Transcription Initiation	[Group8]	[GTF2E2, GTF2F1, GTF2H4, MNAT1, POLR2E, POLR2G, POLR2H, POLR2J, POLR2L, TAF10, TAF6]	0.000580142
										REACTOME:6985859	Formation of RNA Pol II elongation complex	[Group8]	[GTF2F1, GTF2H4, MNAT1, NELFE, POLR2E, POLR2G, POLR2H, POLR2J, POLR2L, SSRP1, SUPT4H1]	0.000580142
										REACTOME:6985860	RNA Polymerase II Transcription Elongation	[Group8]	[GTF2F1, GTF2H4, MNAT1, NELFE, POLR2E, POLR2G, POLR2H, POLR2J, POLR2L, SSRP1, SUPT4H1]	0.000580142
										REACTOME:6986192	Signaling by the B Cell Receptor (BCR)	[Group3]	[AKT1S1, BTK, CASP9, IKBKG, MLST8, PRKCB, PSMB1, PSMB2, PSMB5, PSMB6, PSMB8, PSMC1, PSMC3, PSMC4, PSMC5, PSMD1, PSMD2, PSMD3, PSMD4, PSMD8, PSMD9, PSME2, RPS6KB2]	0.00101759
										REACTOME:6986235	Downstream TCR signaling	[Group3]	[IKBKG, PSMB1, PSMB2, PSMB5, PSMB6, PSMB8, PSMC1, PSMC3, PSMC4, PSMC5, PSMD1, PSMD2, PSMD3, PSMD4, PSMD8, PSMD9, PSME2]	0.00137938
										REACTOME:6986664	Organelle biogenesis and maintenance	[Group2]	[AURKAIP1, B9D1, CSNK1D, ICT1, MRPL10, MRPL18, MRPL2, MRPL21, MRPL24, MRPL27, MRPL37, MRPL39, MRPL41, MRPL43, MRPL46, MRPL48, MRPL51, MRPS11, MRPS15, MRPS16, MRPS23, MRPS24, MRPS25, MRPS30, MRPS33, MRPS5, MRPS7, TNPO1, TUBA4A]	0.00165053
										REACTOME:6986236	TCR signaling	[Group3]	[CSK, IKBKG, PSMB1, PSMB2, PSMB5, PSMB6, PSMB8, PSMC1, PSMC3, PSMC4, PSMC5, PSMD1, PSMD2, PSMD3, PSMD4, PSMD8, PSMD9, PSME2]	0.00166821
										REACTOME:6986839	Hedgehog 'off' state	[Group3]	[PSMB1, PSMB2, PSMB5, PSMB6, PSMB8, PSMC1, PSMC3, PSMC4, PSMC5, PSMD1, PSMD2, PSMD3, PSMD4, PSMD8, PSMD9, PSME2]	0.00168424
										REACTOME:6985756	RNA Pol II CTD phosphorylation and interaction with CE	[Group8]	[GTF2F1, GTF2H4, MNAT1, POLR2E, POLR2G, POLR2H, POLR2J, POLR2L]	0.00252524
										REACTOME:6985755	mRNA Capping	[Group8]	[GTF2F1, GTF2H4, MNAT1, POLR2E, POLR2G, POLR2H, POLR2J, POLR2L]	0.00334162
										REACTOME:6985673	RNA Polymerase I, RNA Polymerase III, and Mitochondrial Transcription	[Group8]	[CHD4, ERCC6, GTF2H4, MBD2, MNAT1, MTA3, POLR2E, POLR2H, POLR2L, POLR3A, POLR3B, POLR3H, RBBP7]	0.00342182
										REACTOME:6986228	TCF dependent signaling in response to WNT	[Group3]	[CSNK2A1, CSNK2B, PSMB1, PSMB2, PSMB5, PSMB6, PSMB8, PSMC1, PSMC3, PSMC4, PSMC5, PSMD1, PSMD2, PSMD3, PSMD4, PSMD8, PSMD9, PSME2, SMARCA4]	0.00441709
										REACTOME:6985803	Translesion Synthesis by POLH	[Group8, Group9]	[PCNA, RFC3, RPA1, RPA2, UFD1L, VCP]	0.00450352
										REACTOME:6985793	Global Genome Nucleotide Excision Repair (GG-NER)	[Group8, Group9]	[ACTL6A, COPS3, COPS4, COPS5, GPS1, GTF2H4, INO80C, MNAT1, PCNA, RFC3, RPA1, RPA2]	0.00474815
										REACTOME:6985671	RNA Polymerase I Promoter Clearance	[Group8]	[CHD4, ERCC6, GTF2H4, MBD2, MNAT1, MTA3, POLR2E, POLR2H, POLR2L, RBBP7]	0.00551528
										REACTOME:6986484	Signaling by Hedgehog	[Group3]	[PSMB1, PSMB2, PSMB5, PSMB6, PSMB8, PSMC1, PSMC3, PSMC4, PSMC5, PSMD1, PSMD2, PSMD3, PSMD4, PSMD8, PSMD9, PSME2, VCP]	0.0061058
										REACTOME:6985672	RNA Polymerase I Transcription	[Group8]	[CHD4, ERCC6, GTF2H4, MBD2, MNAT1, MTA3, POLR2E, POLR2H, POLR2L, RBBP7]	0.00655418
										REACTOME:6985684	DNA Repair	[Group8]	[ACTL6A, C18H19orf40, CDK2, COPS3, COPS4, COPS5, ERCC6, GPS1, GTF2H4, INO80C, MNAT1, PCNA, POLR2E, POLR2G, POLR2H, POLR2J, POLR2L, RBBP8, RFC3, RPA1, RPA2, SIRT6, TIMELESS, UFD1L, UNG, USP7, VCP]	0.00813965
										REACTOME:6985741	RNA Polymerase III Transcription Initiation From Type 1 Promoter	[Group8]	[POLR2E, POLR2H, POLR2L, POLR3A, POLR3B, POLR3H]	0.00842011
										REACTOME:6985774	RNA Polymerase III Transcription Initiation From Type 2 Promoter	[Group8]	[POLR2E, POLR2H, POLR2L, POLR3A, POLR3B, POLR3H]	0.00842011
										REACTOME:6985775	RNA Polymerase III Transcription Initiation From Type 3 Promoter	[Group8]	[POLR2E, POLR2H, POLR2L, POLR3A, POLR3B, POLR3H]	0.00842011
										REACTOME:6986453	mRNA decay by 5' to 3' exoribonuclease	[Group0]	[EDC4, LSM2, LSM3, LSM4, LSM5]	0.0094293
										REACTOME:6985674	RNA Polymerase I Transcription Initiation	[Group8]	[CHD4, ERCC6, GTF2H4, MNAT1, MTA3, POLR2E, POLR2H, POLR2L, RBBP7]	0.0130608
										REACTOME:6986887	Processing of DNA double-strand break ends	[Group9]	[CDK2, RBBP8, RFC3, RPA1, RPA2, SIRT6, TIMELESS]	0.0140295
										REACTOME:6986835	Transcriptional regulation by small RNAs	[Group8]	[AAAS, NUP188, NUP37, NUP43, POLR2E, POLR2G, POLR2H, POLR2J, POLR2L]	0.0152962
										REACTOME:6986779	Chromatin modifying enzymes	[Group1]	[ACTL6A, ARID2, CDK4, CHD4, HDAC8, MSL3, MTA3, RBBP7, SMARCA4, SMARCC1, WDR5]	0.0182851
										REACTOME:6986780	Chromatin organization	[Group1]	[ACTL6A, ARID2, CDK4, CHD4, HDAC8, MSL3, MTA3, RBBP7, SMARCA4, SMARCC1, WDR5]	0.0182851
										REACTOME:6985742	RNA Polymerase III Transcription Initiation	[Group8]	[POLR2E, POLR2H, POLR2L, POLR3A, POLR3B, POLR3H]	0.0185624
										REACTOME:6985743	RNA Polymerase III Transcription	[Group8]	[POLR2E, POLR2H, POLR2L, POLR3A, POLR3B, POLR3H]	0.0185624
										REACTOME:6986177	Signaling by Wnt	[Group3]	[CSNK2A1, CSNK2B, NFATC1, PPP2R1B, PRKCB, PSMB1, PSMB2, PSMB5, PSMB6, PSMB8, PSMC1, PSMC3, PSMC4, PSMC5, PSMD1, PSMD2, PSMD3, PSMD4, PSMD8, PSMD9, PSME2, SMARCA4]	0.0247879
										REACTOME:6985608	Metabolism of amino acids and derivatives	[Group3]	[ARG1, CNDP2, ETHE1, MRPL12, OAZ1, PSMB1, PSMB2, PSMB5, PSMB6, PSMB8, PSMC1, PSMC3, PSMC4, PSMC5, PSMD1, PSMD2, PSMD3, PSMD4, PSMD8, PSMD9, PSME2, PYCR2, PYCRL]	0.0260776
										REACTOME:6985578	Oxidative Stress Induced Senescence	[Group4]	[CBX8, CDK4, CDK6, MAPKAPK3, MAPKAPK5, RBBP7, RING1, SUZ12]	0.0297011
										REACTOME:6986454	Deadenylation-dependent mRNA decay	[Group0]	[DCPS, EDC4, EIF4B, EXOSC4, LSM2, LSM3, LSM4, LSM5, RQCD1]	0.0320165
										REACTOME:6985571	Cellular Senescence	[Group4]	[ANAPC10, ANAPC5, ASF1A, CBX8, CDK2, CDK4, CDK6, EHMT1, MAPKAPK3, MAPKAPK5, RBBP7, RING1, SUZ12]	0.0349205
										REACTOME:6985800	Translesion synthesis by REV1	[Group8, Group9]	[PCNA, RFC3, RPA1, RPA2]	0.0392564
										REACTOME:6986778	RMTs methylate histone arginines	[Group1]	[ACTL6A, ARID2, CDK4, SMARCA4, SMARCC1]	0.039349
										REACTOME:6985576	Activation of ATR in response to replication stress	[Group9]	[CDK2, MCM6, ORC6, RFC3, RPA1, RPA2]	0.0419236
										REACTOME:6985965	Attachment of GPI anchor to uPAR	[Group10]	[PIGS, PIGT, PIGU]	0.0434411
										REACTOME:6986092	Removal of the Flap Intermediate from the C-strand	[Group9]	[PCNA, RPA1, RPA2]	0.0434411
										REACTOME:6985688	Apoptosis	[Group7]	[ACIN1, BAD, BAK1, BCL2, CASP9, DBNL, FNTA, HMGB1, HMGB2, TRADD]	0.0455989
										REACTOME:6985558	DNA strand elongation	[Group8, Group9]	[GINS3, PCNA, RFC3, RPA1, RPA2]	0.0474509
										REACTOME:6985639	Detoxification of Reactive Oxygen Species	[Group6]	[GPX2, GPX7, PRDX1, TXN2, TXNRD1]	0.0474509
										REACTOME:6985829	Innate Immune System	[Group3]	[ADRBK1, AKT1S1, ARPC1B, ARPC4, BCL2, BTK, C3, CASP9, CNPY3, ECSIT, ELMO2, HMGB1, IKBKG, ITGAM, MAPKAPK3, MLST8, NCKAP1L, NFATC1, NLRX1, POLR2E, POLR2H, POLR2L, POLR3A, POLR3B, POLR3H, PPP2R1B, PSMB1, PSMB2, PSMB5, PSMB6, PSMB8, PSMC1, PSMC3, PSMC4, PSMC5, PSMD1, PSMD2, PSMD3, PSMD4, PSMD8, PSMD9, PSME2, RPS6KB2, UBE2M]	0.0475538
										REACTOME:6986788	Cellular response to heat stress	[Group9]	[AKT1S1, MLST8, RPA1, RPA2, RPTOR, VCP]	0.0483922
										REACTOME:6986248	Gene Silencing by RNA	[Group8]	[AAAS, NUP188, NUP37, NUP43, POLR2E, POLR2G, POLR2H, POLR2J, POLR2L]	0.0495771
										REACTOME:6986870	Translesion synthesis by POLK	[Group8, Group9]	[PCNA, RFC3, RPA1, RPA2]	0.0496018
										REACTOME:6986871	Translesion synthesis by POLI	[Group8, Group9]	[PCNA, RFC3, RPA1, RPA2]	0.0496018

## Sheet: ivory
Biological Process (BP)					Molecular Function (MF)					REACTOME pathway
BP GOID	BP GOTerm	BP GO Groups	Associated Genes Found	Term PValue Corrected with Benjamini-Hochberg	MF GOID	MF GOTerm	MF GO Groups	Associated Genes Found	Term PValue Corrected with Benjamini-Hochberg	REACTOME ID	REACTOME Pathway	REACTOME Groups	Associated Genes Found	Term PValue Corrected with Benjamini-Hochberg
GO:0003008	system process	[Group29, Group32]	[ACE, ACTN2, ACTN3, ADCY1, ADIPOQ, ADRA1B, ADRBK1, AFF2, AIPL1, AQP1, ATP1A3, AVP, AVPR1B, AVPR2, AXIN1, BCL2, BEST1, CA6, CACNA1A, CACNA1B, CACNA1E, CACNA1G, CACNA1I, CACNA1S, CACNB4, CACNG4, CARTPT, CASR, CBR3, CCL3, CDHR1, CHRM1, CHRM4, CHRM5, CHRNA10, CHRNB4, CHRND, CNGA1, CNGB1, COL11A1, COL1A1, COL2A1, CRTC1, CRYBB2, DBH, DMPK, DNM1, ECE2, EDN2, FGB, FSHR, FZD2, FZD9, GABRA3, GABRD, GABRP, …	4.72907e-20	GO:0046873	metal ion transmembrane transporter activity	[Group1, Group8]	[AQP1, ATP1A3, ATP1B2, CACNA1A, CACNA1B, CACNA1E, CACNA1G, CACNA1H, CACNA1I, CACNA1S, CACNB1, CACNB4, CACNG4, CACNG6, CNGA1, CNGB1, HCN4, HTT, KCNB2, KCNE1, KCNF1, KCNJ16, KCNN3, KCNT1, MRS2, OPRM1, ORAI1, RYR3, SCN5A, SCNN1B, SLC12A1, SLC12A3, SLC12A8, SLC13A3, SLC24A1, SLC34A2, SLC4A11, SLC6A1, SLC6A17, SLC6A19, SLC6A2, SLC6A3, SLC6A4, SLC6A8, SLC6A9, SLC9A1, SLC9A3, SLC9A5, TRPC2, TRPC5, TRPM4…	2.38906e-07	REACTOME:6986374	Striated Muscle Contraction	[Group3]	[ACTN2, ACTN3, MYBPC1, MYBPC3, MYH7, MYL3, MYL4, TCAP, TMOD1, TNNC1, TNNC2, TNNT1, TNNT2, TNNT3]	6.16883e-06
GO:0050877	neurological system process	[Group32]	[ADCY1, ADRA1B, AFF2, AIPL1, AQP1, ATP1A3, AXIN1, BEST1, CA6, CACNA1A, CACNA1E, CACNA1I, CACNB4, CACNG4, CARTPT, CBR3, CCL3, CDHR1, CHRM1, CHRM4, CHRM5, CHRNA10, CHRNB4, CHRND, CNGA1, CNGB1, COL11A1, COL1A1, COL2A1, CRTC1, CRYBB2, DBH, DNM1, FZD2, FZD9, GABRA3, GABRD, GABRP, GJB2, GNAS, GNAT2, GPR161, GRK7, HTR4, HTT, IFT20, JAKMIP1, LAMC3, LPO, MAP1A, MIP, MYH10, MYO1A, NPTX2, NRG1, OPN1LW, OPRM…	3.56625e-10	GO:0008324	cation transmembrane transporter activity	[Group1, Group8]	[AQP1, ATP13A2, ATP13A4, ATP1A3, ATP1B2, ATP5B, ATP5G1, ATP6V0E2, CACNA1A, CACNA1B, CACNA1E, CACNA1G, CACNA1H, CACNA1I, CACNA1S, CACNB1, CACNB4, CACNG4, CACNG6, CHRNA10, CHRNB4, CHRND, CNGA1, CNGB1, COX6A2, COX8B, HCN4, HTT, KCNB2, KCNE1, KCNF1, KCNJ16, KCNN3, KCNT1, LAT, MRS2, NDUFA4, OPRM1, ORAI1, P2RX2, PIEZO1, RHAG, RYR3, SCN5A, SCNN1B, SLC12A1, SLC12A3, SLC12A8, SLC13A3, SLC24A1, SLC34A2, SL…	2.19662e-06	REACTOME:6986319	Class A/1 (Rhodopsin-like receptors)	[Group1]	[ADRA1B, APLN, AVP, AVPR1B, AVPR2, C5, CCKBR, CCL21, CCL25, CCL3, CCR3, CHRM1, CHRM4, CHRM5, CNR2, CXCR3, CXCR5, EDN2, F2, FSHB, FSHR, GPR68, HCRTR1, HTR1A, HTR1B, HTR4, KEL, LHB, LPAR1, NMB, OPN1LW, OPRM1, OXTR, P2RY2, PNOC, PRLH, PTGFR, RHO, TSHB, TSHR]	0.000115488
GO:0007600	sensory perception	[Group32, Group68]	[AIPL1, AQP1, AXIN1, BEST1, CA6, CACNA1E, CACNB4, CCL3, CDHR1, CHRM1, CHRM4, CHRM5, CHRNA10, CNGA1, CNGB1, COL11A1, COL1A1, COL2A1, CRYBB2, DNM1, FZD2, GJB2, GNAS, GNAT2, GPR161, GRK7, HTR4, LAMC3, LPO, MAP1A, MIP, MYO1A, OPN1LW, OPRM1, P2RX2, PDE4A, PDE6B, PDE6G, PRPH2, RAB3A, RAX2, REEP2, RGS9BP, RHO, ROM1, RPGRIP1, RTP3, SAG, SCNN1B, SIX1, SLC24A1, SLC6A3, SOBP, TBL1X, TFAP2A, TH, VSX1]	2.731e-09	GO:0038023	signaling receptor activity	[Group9]	[ADGRL1, ADRA1B, AVPR1B, AVPR2, CASR, CCKBR, CCR3, CD79A, CELSR2, CHRM1, CHRM4, CHRM5, CHRNA10, CHRNB4, CHRND, CNR2, CNTFR, CR2, CXCR3, CXCR5, EGFR, ESR2, F2, FGFR2, FLT4, FSHR, FZD2, FZD9, GABBR1, GABRA3, GABRD, GABRP, GHRHR, GPR128, GPR161, GPR162, GPR61, GPR68, GPRC5A, GRIA3, GRID1, HCRTR1, HTR1A, HTR1B, HTR4, IFNGR2, IL17RE, IL18R1, IL1RAP, IL22RA1, IL2RB, INSR, LAG3, LGR6, LPAR1, LY6G6E, MPL…	2.28304e-06	REACTOME:6985981	GPCR ligand binding	[Group1]	[ADRA1B, APLN, AVP, AVPR1B, AVPR2, C5, CASR, CCKBR, CCL21, CCL25, CCL3, CCR3, CHRM1, CHRM4, CHRM5, CNR2, CXCR3, CXCR5, EDN2, F2, FSHB, FSHR, GABBR1, GHRHR, GNAS, GNGT2, GPR68, HCRTR1, HTR1A, HTR1B, HTR4, KEL, LHB, LPAR1, NMB, OPN1LW, OPRM1, OXTR, P2RY2, PNOC, PRLH, PTGFR, RHO, TSHB, TSHR]	0.00016968
GO:0048513	organ development	[Group54]	[ACE, ACP5, ACTN2, ACTN3, ADAM15, ADIPOQ, ADRA1B, ADRBK1, AFP, AGR2, AHSP, ALOX12B, ALOX15B, ALPK3, APC, AQP1, ASCL2, ASPM, ATN1, AXIN1, BCAN, BCL2, BGLAP, BMP7, CACNA1A, CACNA1S, CACNB4, CARD11, CCL3, CCNF, CD28, CD79A, CDH23, CDKN1C, CELA1, CELSR2, CHAD, CHRNA10, CHRND, CLPTM1, CNTFR, COL11A1, COL1A1, COL2A1, COL3A1, COL4A3, COL4A4, CR2, CRYBA2, CRYBB2, CRYGB, CSF1, CUL7, CXCR5, CYP19A1, DACT2,…	4.59972e-07	GO:0022836	gated channel activity	[Group1]	[AQP1, CACNA1A, CACNA1B, CACNA1E, CACNA1G, CACNA1H, CACNA1I, CACNA1S, CACNB1, CACNB4, CACNG4, CACNG6, CHRNA10, CHRNB4, CHRND, CLCA3, CNGA1, CNGB1, GABRA3, GABRD, GABRP, GRIA3, GRID1, HCN4, KCNB2, KCNE1, KCNF1, KCNJ16, KCNN3, KCNT1, OPRM1, ORAI1, P2RX2, PIEZO1, RYR3, SCN5A, SCNN1B, TRPC2, TRPC5, TRPM4]	2.45831e-06	REACTOME:6986375	Muscle contraction	[Group3]	[ACTN2, ACTN3, MYBPC1, MYBPC3, MYH7, MYL3, MYL4, MYL6B, TCAP, TMOD1, TNNC1, TNNC2, TNNT1, TNNT2, TNNT3]	0.00214564
GO:0007275	multicellular organismal development	[Group54]	[ACE, ACP5, ACTN2, ACTN3, ADAM15, ADCY1, ADGRL1, ADIPOQ, ADRA1B, ADRBK1, AFG3L2, AFP, AGR2, AHSP, AKT2, ALOX12B, ALOX15B, ALPK3, ANPEP, APC, AQP1, ASCL2, ASPH, ASPM, ATN1, ATP5B, AURKB, AXIN1, BCAN, BCL2, BEND6, BGLAP, BMP7, C5, CACNA1A, CACNA1S, CACNB4, CAMSAP2, CARD11, CBLB, CCDC47, CCL3, CCNF, CCR3, CD28, CD79A, CDH23, CDKN1C, CELA1, CELSR2, CHAD, CHRNA10, CHRND, CLPTM1, CLSTN1, CNGB1, CNOT3, …	6.39317e-07	GO:0005216	ion channel activity	[Group1]	[AQP1, BEST1, CACNA1A, CACNA1B, CACNA1E, CACNA1G, CACNA1H, CACNA1I, CACNA1S, CACNB1, CACNB4, CACNG4, CACNG6, CHRNA10, CHRNB4, CHRND, CLCA3, CNGA1, CNGB1, FXYD3, FXYD7, GABRA3, GABRD, GABRP, GRIA3, GRID1, HCN4, KCNB2, KCNE1, KCNF1, KCNJ16, KCNN3, KCNT1, OPRM1, ORAI1, P2RX2, PIEZO1, RYR3, SCN5A, SCNN1B, SLC24A1, SLC4A11, TRPC2, TRPC5, TRPM4, TRPV4, TRPV6]	2.55101e-06	REACTOME:6985632	Signal Transduction	[Group5]	[ACTN2, ADCY1, ADRA1B, ADRBK1, AKT2, AMOTL2, APC, APLN, APOE, ARHGAP1, ARHGAP22, ARHGAP24, ARHGAP32, ARHGDIG, ARHGEF16, ATP6V0E2, ATP6V1B2, AURKB, AVP, AVPR1B, AVPR2, AXIN1, BUB1, C5, CASR, CCKBR, CCL21, CCL25, CCL3, CCR3, CD28, CDCA8, CDK1, CENPA, CENPE, CENPN, CHRM1, CHRM4, CHRM5, CLTB, CNGA1, CNGB1, CNR2, COL4A3, COL4A4, COL6A1, COL6A2, COL9A2, CRABP2, CXCR3, CXCR5, DAGLA, DTX1, DVL3, EDN2, EG…	0.00843959
GO:0048731	system development	[Group54]	[ACE, ACP5, ACTN2, ACTN3, ADAM15, ADCY1, ADGRL1, ADIPOQ, ADRA1B, ADRBK1, AFG3L2, AFP, AGR2, AHSP, AKT2, ALOX12B, ALOX15B, ALPK3, ANPEP, APC, AQP1, ASCL2, ASPM, ATN1, ATP5B, AXIN1, BCAN, BCL2, BEND6, BGLAP, BMP7, C5, CACNA1A, CACNA1S, CACNB4, CAMSAP2, CARD11, CBLB, CCL3, CCNF, CCR3, CD28, CD79A, CDH23, CDKN1C, CELA1, CELSR2, CHAD, CHRNA10, CHRND, CLPTM1, CLSTN1, CNGB1, CNTFR, COL11A1, COL1A1, COL2…	8.22135e-07	GO:0022890	inorganic cation transmembrane transporter activity	[Group1, Group8]	[AQP1, ATP1A3, ATP1B2, ATP5B, ATP5G1, ATP6V0E2, CACNA1A, CACNA1B, CACNA1E, CACNA1G, CACNA1H, CACNA1I, CACNA1S, CACNB1, CACNB4, CACNG4, CACNG6, CNGA1, CNGB1, COX6A2, COX8B, HCN4, HTT, KCNB2, KCNE1, KCNF1, KCNJ16, KCNN3, KCNT1, MRS2, NDUFA4, OPRM1, ORAI1, RHAG, RYR3, SCN5A, SCNN1B, SLC12A1, SLC12A3, SLC12A8, SLC13A3, SLC24A1, SLC34A2, SLC4A11, SLC6A1, SLC6A17, SLC6A19, SLC6A2, SLC6A3, SLC6A4, SLC6A…	2.5748e-06	REACTOME:6985879	GPCR downstream signaling	[Group1]	[ADCY1, ADRA1B, ADRBK1, APLN, ARHGEF16, AVP, AVPR1B, AVPR2, C5, CASR, CCKBR, CCL21, CCL25, CCR3, CHRM1, CHRM4, CHRM5, CNR2, CXCR3, CXCR5, DAGLA, EDN2, F2, FSHB, FSHR, GABBR1, GHRHR, GNAS, GNAT2, GPR68, HCRTR1, HTR1A, HTR1B, HTR4, LHB, LPAR1, NMB, OPN1LW, OPRM1, OXTR, P2RY2, PDE1B, PDE4A, PDE4D, PLCB3, PNOC, PRKCD, PTGFR, RGS19, RHO, TSHB, TSHR]	0.00949468
GO:0048638	regulation of developmental growth	[Group21]	[ACTN3, AFG3L2, AGR2, BCL2, COLQ, CPNE5, CPNE6, CRABP2, CSF1, DMPK, FGF8, FGFR2, FN1, GDF5, GH1, GHRHR, GNAS, HNF1B, HTT, IGF1, IL7, INSR, LEP, MAPT, MBD5, MYOD1, NCOR1, NPPC, NRG1, PEX5, PI16, PLXNA3, PLXNA4, PPARD, PRLH, SEMA4B, SEMA5B, SEMA6B, SIX1, SLC6A3, SLC6A4, SYT1, SYT17, SYT3, TP73, TSHR, ZP3]	1.42392e-06	GO:0015081	sodium ion transmembrane transporter activity	[Group1, Group8]	[ATP1A3, ATP1B2, HCN4, HTT, SCN5A, SCNN1B, SLC12A1, SLC12A3, SLC13A3, SLC24A1, SLC34A2, SLC4A11, SLC6A1, SLC6A17, SLC6A19, SLC6A2, SLC6A3, SLC6A4, SLC6A8, SLC6A9, SLC9A1, SLC9A3, SLC9A5]	2.74876e-06	REACTOME:6986270	Depolarization of the Presynaptic Terminal Triggers the Opening of Calcium Channels	[Group10]	[CACNA1A, CACNA1B, CACNA1E, CACNB1, CACNB4, CACNG4]	0.00976504
GO:0048589	developmental growth	[Group21]	[ACTN3, ADRA1B, AFG3L2, AGR2, ASPM, BCL2, CDKN1C, CELA1, CHRND, COLQ, CPNE5, CPNE6, CRABP2, CSF1, CYP19A1, DMBT1, DMPK, FGF1, FGF8, FGFR2, FN1, GDF5, GDF9, GH1, GHRHR, GINS4, GNAS, HNF1B, HOXA5, HTT, IGF1, IL7, INSR, INTS1, LEP, MAPT, MBD5, MYOD1, NCOR1, NPPC, NRG1, PDE4D, PEX5, PI16, PLG, PLXNA3, PLXNA4, PPARD, PRLH, RAD51B, SELM, SEMA4B, SEMA5B, SEMA6B, SEPN1, SETDB1, SFTPA1, SHH, SIX1, SLC6A3,…	2.70164e-06	GO:0022838	substrate-specific channel activity	[Group1]	[AQP1, BEST1, CACNA1A, CACNA1B, CACNA1E, CACNA1G, CACNA1H, CACNA1I, CACNA1S, CACNB1, CACNB4, CACNG4, CACNG6, CHRNA10, CHRNB4, CHRND, CLCA3, CNGA1, CNGB1, FXYD3, FXYD7, GABRA3, GABRD, GABRP, GRIA3, GRID1, HCN4, KCNB2, KCNE1, KCNF1, KCNJ16, KCNN3, KCNT1, MIP, OPRM1, ORAI1, P2RX2, PIEZO1, RYR3, SCN5A, SCNN1B, SLC24A1, SLC4A11, TRPC2, TRPC5, TRPM4, TRPV4, TRPV6]	2.81621e-06	REACTOME:6985812	Signaling by GPCR	[Group1]	[ACTN2, ADCY1, ADRA1B, ADRBK1, APLN, ARHGEF16, AVP, AVPR1B, AVPR2, C5, CASR, CCKBR, CCL21, CCL25, CCL3, CCR3, CHRM1, CHRM4, CHRM5, CNR2, CXCR3, CXCR5, DAGLA, EDN2, EGFR, F2, FGF1, FGF8, FGFR2, FSHB, FSHR, GABBR1, GHRHR, GNAS, GNAT2, GNGT2, GPR68, HCRTR1, HTR1A, HTR1B, HTR4, IRS1, KEL, LAT, LHB, LPAR1, MAP2K2, MAP3K11, NMB, NRG1, OPN1LW, OPRM1, OXTR, P2RY2, PDE1B, PDE4A, PDE4D, PDGFRA, PLCB3, PNOC…	0.0109707
GO:0044057	regulation of system process	[Group29, Group32]	[ACTN3, ADIPOQ, ADRA1B, ADRBK1, AQP1, AVPR1B, AVPR2, CACNA1B, CACNA1E, CACNA1G, CARTPT, CCL3, CHRNB4, DBH, DMPK, EDN2, FGB, GDF9, GH1, GPD1L, GTF2IRD1, HCN4, HRC, IGF1, KCNE1, LEP, MTG1, MYBPC3, MYH7, MYL3, MYL4, MYLK2, MYOG, NPVF, NR1H3, NRG1, OXTR, P2RY2, PDE4D, PI16, PRKCA, PRKG1, SEPN1, SLC9A1, SMTNL1, TFF2, TH, TNNC1, TNNT1, TNNT2, TRPM4]	3.17127e-06	GO:0004888	transmembrane signaling receptor activity	[Group9]	[ADGRL1, ADRA1B, AVPR1B, AVPR2, CASR, CCKBR, CCR3, CD79A, CELSR2, CHRM1, CHRM4, CHRM5, CHRNA10, CHRNB4, CHRND, CNR2, CNTFR, CR2, CXCR3, CXCR5, EGFR, FGFR2, FLT4, FSHR, FZD2, FZD9, GABBR1, GABRA3, GABRD, GABRP, GHRHR, GPR128, GPR161, GPR162, GPR61, GPR68, GPRC5A, GRIA3, GRID1, HCRTR1, HTR1A, HTR1B, HTR4, IFNGR2, IL17RE, IL18R1, IL1RAP, IL22RA1, IL2RB, INSR, LAG3, LGR6, LPAR1, LY6G6E, MPL, MRGPRF, …	2.89882e-06	REACTOME:6985613	Transmission across Chemical Synapses	[Group0]	[ABAT, ACTN2, ADCY1, CACNA1A, CACNA1B, CACNA1E, CACNB1, CACNB4, CACNG4, CAMKK1, CHRNB4, CHRND, EPB41L1, GABBR1, GABRA3, GAD1, GNGT2, GRIA3, KCNJ16, PLCB3, PRKCA, RAB3A, SLC18A3, SLC6A1, SYT1]	0.0218337
GO:0051239	regulation of multicellular organismal process	[Group43, Group54]	[ACE, ACP5, ACTN3, ADGRL1, ADIPOQ, ADRA1B, ADRBK1, AFG3L2, AGPAT1, ALOX12B, ALOX15B, APC, AQP1, ARFGEF2, ASPM, AVPR1B, AVPR2, BCL2, BEND6, BGLAP, BMP7, C5, CACNA1A, CACNA1B, CACNA1E, CACNA1G, CARD11, CARD9, CARTPT, CBLB, CCL3, CCR3, CD2, CD28, CHAD, CHID1, CHRNB4, CLPTM1, CLSTN1, CNOT3, COL1A1, COL3A1, COL4A3, COLQ, CPNE5, CPNE6, CRABP2, CSF1, CXCR3, DBH, DMBT1, DMPK, DTX1, DVL3, EAF2, EDN2, EGR1…	1.26753e-05	GO:0015075	ion transmembrane transporter activity	[Group1, Group8]	[AQP1, ATP13A2, ATP13A4, ATP1A3, ATP1B2, ATP5B, ATP5G1, ATP6V0E2, BEST1, CACNA1A, CACNA1B, CACNA1E, CACNA1G, CACNA1H, CACNA1I, CACNA1S, CACNB1, CACNB4, CACNG4, CACNG6, CHRNA10, CHRNB4, CHRND, CLCA3, CNGA1, CNGB1, COX6A2, COX8B, FXYD3, FXYD7, GABRA3, GABRD, GABRP, GRIA3, GRID1, HCN4, HTT, KCNB2, KCNE1, KCNF1, KCNJ16, KCNN3, KCNT1, LAT, MRS2, NDUFA4, OPRM1, ORAI1, P2RX2, PIEZO1, RHAG, RYR3, SCN5A, …	2.98144e-06	REACTOME:6985614	Neuronal System	[Group0]	[ABAT, ACTN2, ADCY1, CACNA1A, CACNA1B, CACNA1E, CACNB1, CACNB4, CACNG4, CAMKK1, CHRNB4, CHRND, EPB41L1, GABBR1, GABRA3, GAD1, GNGT2, GRIA3, HCN4, KCNB2, KCNF1, KCNJ16, KCNN3, PLCB3, PRKCA, RAB3A, SLC18A3, SLC6A1, SYT1]	0.0255376
GO:0034220	ion transmembrane transport	[Group18]	[ACTN2, AKT2, AQP1, ASPH, ATP13A2, ATP13A4, ATP1A3, ATP1B2, ATP5B, ATP5G1, ATP6V0E2, ATP6V1B2, BEST1, CACNA1A, CACNA1B, CACNA1E, CACNA1G, CACNA1H, CACNA1I, CACNA1S, CACNB1, CACNB4, CACNG4, CACNG6, CHRNA10, CHRNB4, CHRND, CLCA3, CNGB1, COX6A2, COX8B, FXYD3, FXYD7, GABRA3, GABRD, GABRP, GPD1L, GRIA3, GRID1, HCN4, HRC, HTT, IGF1, KCNB2, KCNE1, KCNF1, KCNIP2, KCNJ16, KCNT1, KEL, LAT, MIP, MRS2, NDUFA…	1.65801e-05	GO:0005261	cation channel activity	[Group1]	[AQP1, CACNA1A, CACNA1B, CACNA1E, CACNA1G, CACNA1H, CACNA1I, CACNA1S, CACNB1, CACNB4, CACNG4, CACNG6, CHRNA10, CHRNB4, CHRND, CNGA1, CNGB1, HCN4, KCNB2, KCNE1, KCNF1, KCNJ16, KCNN3, KCNT1, OPRM1, ORAI1, P2RX2, PIEZO1, RYR3, SCN5A, SCNN1B, SLC24A1, SLC4A11, TRPC2, TRPC5, TRPM4, TRPV4, TRPV6]	3.51264e-06	REACTOME:6986548	O-linked glycosylation	[Group6]	[B3GNT4, B3GNT8, B4GALT5, GALNT13, GCNT3, MUC1, MUC15, POFUT2, ST6GAL1, THBS1]	0.0258494
GO:0030154	cell differentiation	[Group54]	[ACTN2, ACTN3, ADAM15, ADCY1, ADIPOQ, AFG3L2, AGR2, AKT2, ALDH6A1, ALDOC, ALOX15B, ANPEP, APC, ASCL2, ASPM, ATN1, ATP5B, AXIN1, BCL2, BEND6, BGLAP, BMP7, BSCL2, CACNA1A, CACNA1S, CACNB4, CAMSAP2, CARD11, CCDC47, CCDC85B, CCHCR1, CCL3, CD28, CD79A, CDH23, CDK1, CDKN1C, CELA1, CELSR2, CLPTM1, CNGB1, CNOT3, COL11A1, COL1A1, COL2A1, COL3A1, COL6A1, CPNE5, CPNE6, CR2, CRABP2, CRYGB, CSF1, CSPG4, CUL7,…	1.72243e-05	GO:0015267	channel activity	[Group1]	[AQP1, BCL2, BEST1, CACNA1A, CACNA1B, CACNA1E, CACNA1G, CACNA1H, CACNA1I, CACNA1S, CACNB1, CACNB4, CACNG4, CACNG6, CHRNA10, CHRNB4, CHRND, CLCA3, CNGA1, CNGB1, FXYD3, FXYD7, GABRA3, GABRD, GABRP, GJB2, GRIA3, GRID1, HCN4, KCNB2, KCNE1, KCNF1, KCNJ16, KCNN3, KCNT1, MIP, OPRM1, ORAI1, P2RX2, PIEZO1, RYR3, SCN5A, SCNN1B, SLC24A1, SLC4A11, TRPC2, TRPC5, TRPM4, TRPV4, TRPV6]	4.992e-06	REACTOME:6985885	Extracellular matrix organization	[Group7]	[ADAM15, BCAN, BMP7, COL11A1, COL17A1, COL1A1, COL22A1, COL2A1, COL3A1, COL4A3, COL4A4, COL6A1, COL6A2, COL9A2, EFEMP2, ELANE, ELN, FGB, FN1, GDF5, IBSP, ITGA10, ITGAD, ITGB3, LAMA1, LAMC1, MFAP2, MMP14, MMP15, MMP2, PLOD3, PRKCA, THBS1, TLL2]	0.0260159
GO:0007267	cell-cell signaling	[Group64]	[ADGRL1, ADIPOQ, ADRA1B, AQP1, CACNA1A, CACNA1B, CACNA1E, CACNA1G, CACNB1, CACNB4, CARTPT, CCL3, CHRM1, CHRM4, CHRM5, CHRNA10, CHRNB4, CHRND, CLSTN1, CPLX2, DMPK, DNM1, FGB, FGFR2, FZD2, GABRA3, GABRD, GABRP, GCK, GDF9, GFAP, GH1, GHRHR, GJB2, GPR68, GRIA3, GRID1, HCN4, HCRTR1, HNF1B, HOXA5, HTR1A, HTR1B, HTR4, HTT, ICA1, IL7, IRS1, LEP, LIF, MYLK2, NNAT, NPAS4, NPVF, NR1D1, OPRM1, P2RX2, PLCB3, …	1.78307e-05	GO:0022803	passive transmembrane transporter activity	[Group1]	[AQP1, BCL2, BEST1, CACNA1A, CACNA1B, CACNA1E, CACNA1G, CACNA1H, CACNA1I, CACNA1S, CACNB1, CACNB4, CACNG4, CACNG6, CHRNA10, CHRNB4, CHRND, CLCA3, CNGA1, CNGB1, FXYD3, FXYD7, GABRA3, GABRD, GABRP, GJB2, GRIA3, GRID1, HCN4, KCNB2, KCNE1, KCNF1, KCNJ16, KCNN3, KCNT1, MIP, OPRM1, ORAI1, P2RX2, PIEZO1, RYR3, SCN5A, SCNN1B, SLC24A1, SLC4A11, TRPC2, TRPC5, TRPM4, TRPV4, TRPV6]	4.992e-06	REACTOME:6986293	Peptide hormone biosynthesis	[Group4]	[FSHB, INHA, LHB, PCSK1, TSHB]	0.0265312
GO:0007601	visual perception	[Group32]	[AIPL1, BEST1, CACNB4, CDHR1, CNGA1, CNGB1, COL11A1, COL1A1, COL2A1, CRYBB2, GNAT2, GRK7, LAMC3, MIP, OPN1LW, PDE6B, PDE6G, PRPH2, RAX2, RGS9BP, RHO, ROM1, RPGRIP1, SAG, SLC24A1, TH, VSX1]	2.13438e-05	GO:0022891	substrate-specific transmembrane transporter activity	[Group1, Group8]	[AQP1, ATP13A2, ATP13A4, ATP1A3, ATP1B2, ATP5B, ATP5G1, ATP6V0E2, BEST1, CACNA1A, CACNA1B, CACNA1E, CACNA1G, CACNA1H, CACNA1I, CACNA1S, CACNB1, CACNB4, CACNG4, CACNG6, CHRNA10, CHRNB4, CHRND, CLCA3, CNGA1, CNGB1, COX6A2, COX8B, FXYD3, FXYD7, GABRA3, GABRD, GABRP, GRIA3, GRID1, HCN4, HTT, KCNB2, KCNE1, KCNF1, KCNJ16, KCNN3, KCNT1, LAT, MIP, MRS2, NDUFA4, OPRM1, ORAI1, P2RX2, PIEZO1, RHAG, RYR3, SC…	1.26206e-05	REACTOME:6986385	Hormone ligand-binding receptors	[Group4]	[FSHB, FSHR, LHB, TSHB, TSHR]	0.0265312
GO:0061061	muscle structure development	[Group2, Group54]	[ACTN2, ACTN3, AFG3L2, AXIN1, BCL2, CACNA1S, CACNB4, CHRND, CNTFR, COL11A1, COL3A1, DISP1, DMPK, DYRK1B, EGR1, ELN, FGF8, FGFR2, FLOT2, FOXL2, FZD2, HOXD9, IFT20, IGF1, KEL, LEMD2, LIF, MAPK12, MEF2D, MKL1, MMP14, MSC, MYBPC3, MYH10, MYH7, MYL3, MYLK2, MYOD1, MYOG, MYPN, NFATC4, NMRK2, NOX4, NRG1, P2RX2, PDGFRA, PI16, PLG, PPARD, RORA, SEPN1, SHH, SIX1, SLC9A1, SMTNL1, SOX10, STAC3, STRA6, TANC1,…	2.53404e-05	GO:0005262	calcium channel activity	[Group1]	[CACNA1A, CACNA1B, CACNA1E, CACNA1G, CACNA1H, CACNA1I, CACNA1S, CACNB1, CACNB4, CACNG4, CACNG6, OPRM1, ORAI1, RYR3, SLC24A1, TRPC2, TRPC5, TRPM4, TRPV4, TRPV6]	1.29917e-05	REACTOME:6986672	Collagen biosynthesis and modifying enzymes	[Group7]	[COL11A1, COL17A1, COL1A1, COL22A1, COL2A1, COL3A1, COL4A3, COL4A4, COL6A1, COL6A2, COL9A2, PLOD3]	0.0298888
GO:0050953	sensory perception of light stimulus	[Group32]	[AIPL1, BEST1, CACNB4, CDHR1, CNGA1, CNGB1, COL11A1, COL1A1, COL2A1, CRYBB2, GNAT2, GRK7, LAMC3, MIP, OPN1LW, PDE6B, PDE6G, PRPH2, RAX2, RGS9BP, RHO, ROM1, RPGRIP1, SAG, SLC24A1, TH, VSX1]	2.69476e-05	GO:0022843	voltage-gated cation channel activity	[Group1]	[CACNA1A, CACNA1B, CACNA1E, CACNA1G, CACNA1H, CACNA1I, CACNA1S, CACNB1, CACNB4, CACNG4, CNGA1, CNGB1, HCN4, KCNB2, KCNE1, KCNF1, KCNJ16, KCNT1, OPRM1, SCN5A]	6.9481e-05	REACTOME:6986266	Catecholamine biosynthesis	[Group9]	[DBH, PNMT, TH]	0.0340367
GO:0048639	positive regulation of developmental growth	[Group21, Group43]	[ACTN3, AGR2, BCL2, CPNE5, CPNE6, CRABP2, CSF1, FGF8, FGFR2, FN1, GH1, GHRHR, IGF1, IL7, INSR, LEP, MAPT, MYOD1, NRG1, PEX5, PPARD, SLC6A3, SYT1, SYT17, SYT3, TSHR, ZP3]	3.01758e-05	GO:0004930	G-protein coupled receptor activity	[Group9]	[ADGRL1, ADRA1B, AVPR1B, AVPR2, CASR, CCKBR, CCR3, CELSR2, CHRM1, CHRM4, CHRM5, CNR2, CXCR3, CXCR5, FSHR, FZD2, FZD9, GABBR1, GHRHR, GPR128, GPR161, GPR162, GPR61, GPR68, GPRC5A, HCRTR1, HTR1A, HTR1B, HTR4, LGR6, LPAR1, MRGPRF, OPN1LW, OPRM1, OXTR, P2RY2, PTGFR, RHO, SFRP4, TSHR]	0.000100191	REACTOME:6986343	G alpha (i) signalling events	[Group1]	[APLN, C5, CASR, CCL21, CCL25, CCR3, CHRM4, CNR2, CXCR3, CXCR5, GABBR1, GNAT2, HTR1A, HTR1B, LPAR1, OPN1LW, OPRM1, PNOC, RHO]	0.0353625
GO:0098655	cation transmembrane transport	[Group18]	[ACTN2, AQP1, ASPH, ATP13A2, ATP13A4, ATP1A3, ATP1B2, ATP5B, ATP5G1, ATP6V0E2, ATP6V1B2, CACNA1A, CACNA1B, CACNA1E, CACNA1G, CACNA1H, CACNA1I, CACNA1S, CACNB1, CACNB4, CACNG4, CACNG6, CHRNA10, CHRNB4, CHRND, COX6A2, COX8B, FXYD3, FXYD7, GPD1L, HCN4, HRC, HTT, IGF1, KCNB2, KCNE1, KCNF1, KCNIP2, KCNJ16, KCNT1, KEL, LAT, MRS2, NDUFA4, OPRM1, ORAI1, P2RX2, PDE4D, PIEZO1, RHAG, RYR3, SCNN1B, SLC12A1, …	3.1361e-05	GO:0005328	neurotransmitter:sodium symporter activity	[Group8]	[HTT, SLC6A1, SLC6A17, SLC6A19, SLC6A2, SLC6A3, SLC6A4, SLC6A8, SLC6A9]	0.000150585	REACTOME:6985835	Phospholipase C-mediated cascade; FGFR2	[Group8]	[ADCY1, ADRBK1, FGF1, FGF8, FGFR2, PDE1B, PLCG1, PRKCA, PRKCD]	0.0364611
GO:0006812	cation transport	[Group18]	[ACTN2, AQP1, ASPH, ATP13A2, ATP13A4, ATP1A3, ATP1B2, ATP5B, ATP5G1, ATP6V0E2, ATP6V1B2, BCL2, BEST1, CACNA1A, CACNA1B, CACNA1E, CACNA1G, CACNA1H, CACNA1I, CACNA1S, CACNB1, CACNB4, CACNG4, CACNG6, CASR, CCL21, CCL3, CHRM5, CHRNA10, CHRNB4, CHRND, CNGA1, CNGB1, CNNM2, COX6A2, COX8B, CXCR3, DMPK, F2, FXYD3, FXYD7, GCK, GH1, GPD1L, HCN4, HRC, HTR1A, HTR1B, HTT, IGF1, KCNB2, KCNE1, KCNF1, KCNIP2, KCN…	4.59679e-05	GO:0015085	calcium ion transmembrane transporter activity	[Group1]	[CACNA1A, CACNA1B, CACNA1E, CACNA1G, CACNA1H, CACNA1I, CACNA1S, CACNB1, CACNB4, CACNG4, CACNG6, OPRM1, ORAI1, RYR3, SLC24A1, TRPC2, TRPC5, TRPM4, TRPV4, TRPV6]	0.000151221	REACTOME:6986547	O-linked glycosylation of mucins	[Group6]	[B3GNT4, B3GNT8, B4GALT5, GALNT13, GCNT3, MUC1, MUC15, ST6GAL1]	0.0377669
GO:0007606	sensory perception of chemical stimulus	[Group11, Group32, Group68]	[CA6, CHRM1, CHRM4, CHRM5, CNGB1, FZD2, GNAS, GNAT2, GPR161, HTR4, LPO, P2RX2, PDE4A, REEP2, RTP3, SCNN1B, SLC6A3]	8.4715e-05	GO:0015077	monovalent inorganic cation transmembrane transporter activity	[Group1, Group8]	[AQP1, ATP1A3, ATP1B2, ATP5B, ATP5G1, ATP6V0E2, CNGA1, CNGB1, COX6A2, COX8B, HCN4, HTT, KCNB2, KCNE1, KCNF1, KCNJ16, KCNN3, KCNT1, NDUFA4, RHAG, SCN5A, SCNN1B, SLC12A1, SLC12A3, SLC12A8, SLC13A3, SLC24A1, SLC34A2, SLC4A11, SLC6A1, SLC6A17, SLC6A19, SLC6A2, SLC6A3, SLC6A4, SLC6A8, SLC6A9, SLC9A1, SLC9A3, SLC9A5]	0.000163171	REACTOME:6986339	Glycoprotein hormones	[Group4]	[FSHB, INHA, LHB, TSHB]	0.0386353
GO:0006941	striated muscle contraction	[Group29, Group33]	[ACTN3, ADRA1B, ADRBK1, CACNA1S, DMPK, GPD1L, HCN4, HRC, MYBPC3, MYH3, MYH7, MYL3, MYL4, MYLK2, PDE4D, RYR3, SLC9A1, SMAD5, STAC3, TAZ, TCAP, TNNC1, TNNC2, TNNT1]	0.000108062	GO:0005245	voltage-gated calcium channel activity	[Group1]	[CACNA1A, CACNA1B, CACNA1E, CACNA1G, CACNA1H, CACNA1I, CACNA1S, CACNB1, CACNB4, CACNG4, OPRM1]	0.000562849	REACTOME:6986362	Vasopressin-like receptors	[Group2]	[AVP, AVPR1B, AVPR2, OXTR]	0.0386353
GO:0006811	ion transport	[Group18]	[ACTN2, AKT2, AQP1, ASPH, ATP10B, ATP13A2, ATP13A4, ATP1A3, ATP1B2, ATP5B, ATP5G1, ATP6V0E2, ATP6V1B2, BCL2, BEST1, CACNA1A, CACNA1B, CACNA1E, CACNA1G, CACNA1H, CACNA1I, CACNA1S, CACNB1, CACNB4, CACNG4, CACNG6, CASR, CCL21, CCL3, CHRM1, CHRM5, CHRNA10, CHRNB4, CHRND, CLCA3, CLDN16, CNGA1, CNGB1, CNNM2, COX6A2, COX8B, CXCR3, DMPK, F2, FXYD3, FXYD7, GABRA3, GABRD, GABRP, GCK, GH1, GPD1L, GRIA3, GRI…	0.000148734	GO:0005244	voltage-gated ion channel activity	[Group1]	[CACNA1A, CACNA1B, CACNA1E, CACNA1G, CACNA1H, CACNA1I, CACNA1S, CACNB1, CACNB4, CACNG4, CACNG6, CNGA1, CNGB1, HCN4, KCNB2, KCNE1, KCNF1, KCNJ16, KCNT1, OPRM1, SCN5A]	0.00144627	REACTOME:6986318	Peptide ligand-binding receptors	[Group1]	[APLN, AVP, AVPR1B, AVPR2, C5, CCKBR, CCL21, CCL25, CCL3, CCR3, CXCR3, CXCR5, EDN2, F2, HCRTR1, KEL, NMB, OPRM1, OXTR, PNOC, PRLH]	0.0398473
GO:0008015	blood circulation	[Group29, Group41]	[ACE, ADIPOQ, ADRA1B, ADRBK1, AVP, AVPR1B, AVPR2, CACNA1B, CACNA1E, CACNA1G, CARTPT, CASR, DBH, DMPK, ECE2, EDN2, FGB, FSHR, GPD1L, HCN4, HRC, HTR1A, HTR1B, KCNE1, MYBPC3, MYH7, MYL3, MYL4, NPPC, OXTR, P2RX2, P2RY2, PDE4D, PLCB3, PLOD3, PRKCA, PRKG1, PTP4A3, SLC9A1, SMAD5, SMTNL1, TAZ, TCAP, TH, TNNC1, TNNT2, TRPM4]	0.000155299	GO:0005516	calmodulin binding	[Group3]	[ADCY1, ASPM, CAMSAP2, GAP43, IQGAP3, KCNN3, MAPKAPK5, MIP, MYH1, MYH10, MYH2, MYH7, MYLK2, MYO1A, MYO1D, PDE1B, PLCB3, SLC9A1, SYT1, TRPV4, TRPV6]	0.00144627
GO:0007186	G-protein coupled receptor signaling pathway	[Group62]	[ACTN2, ADCY1, ADGRL1, ADRA1B, ADRBK1, AVPR1B, AVPR2, CACNA1A, CACNB4, CARTPT, CASR, CCKBR, CCL21, CCL25, CCL3, CCR3, CELSR2, CHRM1, CHRM4, CHRM5, CNR2, CXCR3, CXCR5, DAGLA, ECE2, ENTPD2, F2, FSHR, FZD2, FZD9, GABBR1, GABRA3, GHRHR, GNAS, GNAT2, GNGT2, GPR128, GPR161, GPR162, GPR61, GPR68, GPRC5A, HCRTR1, HTR1A, HTR1B, HTR4, HTT, INSR, LGR6, LPAR1, MRGPRF, NMB, NPVF, OPN1LW, OPRM1, OXTR, P2RY2, P…	0.000155408	GO:0022832	voltage-gated channel activity	[Group1]	[CACNA1A, CACNA1B, CACNA1E, CACNA1G, CACNA1H, CACNA1I, CACNA1S, CACNB1, CACNB4, CACNG4, CACNG6, CNGA1, CNGB1, HCN4, KCNB2, KCNE1, KCNF1, KCNJ16, KCNT1, OPRM1, SCN5A]	0.00144627
GO:0098660	inorganic ion transmembrane transport	[Group18]	[ACTN2, AQP1, ASPH, ATP1A3, ATP1B2, ATP5B, ATP5G1, ATP6V0E2, ATP6V1B2, BEST1, CACNA1A, CACNA1B, CACNA1E, CACNA1G, CACNA1H, CACNA1I, CACNA1S, CACNB1, CACNB4, CACNG4, CACNG6, CLCA3, COX6A2, COX8B, FXYD3, FXYD7, GABRA3, GABRD, GABRP, GPD1L, HCN4, HRC, HTT, IGF1, KCNB2, KCNE1, KCNF1, KCNIP2, KCNJ16, KCNT1, KEL, NDUFA4, OPRM1, ORAI1, PDE4D, RHAG, RYR3, SCNN1B, SLC12A1, SLC12A3, SLC12A8, SLC24A1, SLC34…	0.000178519	GO:0015291	secondary active transmembrane transporter activity	[Group1, Group8]	[HTT, LAT, SLC12A1, SLC12A3, SLC12A8, SLC13A3, SLC22A6, SLC22A8, SLC24A1, SLC34A2, SLC37A4, SLC4A11, SLC4A3, SLC5A11, SLC6A1, SLC6A17, SLC6A19, SLC6A2, SLC6A3, SLC6A4, SLC6A8, SLC6A9, SLC9A1, SLC9A3, SLC9A5, SLCO3A1]	0.00161801
GO:0009888	tissue development	[Group2, Group54]	[ACTN2, ACTN3, ADAM15, ADIPOQ, AGR2, ALDOC, ALOX15B, APC, AQP1, ARHGAP24, ASCL2, AXIN1, BCL2, BGLAP, BMP7, CACNA1S, CACNB4, CDH23, CDK1, CHRND, COL11A1, COL1A1, COL2A1, COL3A1, COL6A1, CRYGB, CSF1, CUL7, DACT2, DLX5, DMBT1, DVL3, DYRK1B, EFNB1, EGFR, EGR1, ELN, ETV4, EYA2, FGF1, FGF8, FGFR2, FN1, FN3K, FOSL2, FOXL2, FSHR, FZD2, GATA2, GCM1, GCNT3, GDF5, GNAS, GNAT2, GPR161, HIPK2, HNF1B, HOXA5, H…	0.00017994	GO:0015276	ligand-gated ion channel activity	[Group1]	[AQP1, CHRNA10, CHRNB4, CHRND, CNGA1, CNGB1, GABRA3, GABRD, GABRP, GRIA3, GRID1, HCN4, KCNJ16, ORAI1, P2RX2, RYR3, SCNN1B, TRPC2, TRPC5]	0.00257151
GO:0003013	circulatory system process	[Group29, Group41]	[ACE, ADIPOQ, ADRA1B, ADRBK1, AVP, AVPR1B, AVPR2, CACNA1B, CACNA1E, CACNA1G, CARTPT, CASR, DBH, DMPK, ECE2, EDN2, FGB, FSHR, GPD1L, HCN4, HRC, HTR1A, HTR1B, KCNE1, MYBPC3, MYH7, MYL3, MYL4, NPPC, OXTR, P2RX2, P2RY2, PDE4D, PLCB3, PLOD3, PRKCA, PRKG1, PTP4A3, SLC9A1, SMAD5, SMTNL1, TAZ, TCAP, TH, TNNC1, TNNT2, TRPM4]	0.000180777	GO:0022834	ligand-gated channel activity	[Group1]	[AQP1, CHRNA10, CHRNB4, CHRND, CNGA1, CNGB1, GABRA3, GABRD, GABRP, GRIA3, GRID1, HCN4, KCNJ16, ORAI1, P2RX2, RYR3, SCNN1B, TRPC2, TRPC5]	0.00257151
GO:0048468	cell development	[Group54]	[ACTN2, ACTN3, ADAM15, ADCY1, ADIPOQ, AFG3L2, AKT2, APC, ASPM, ATN1, AXIN1, BCL2, BEND6, BMP7, CACNA1A, CACNA1S, CACNB4, CAMSAP2, CDH23, CDKN1C, CNGB1, CNOT3, COL11A1, COL1A1, COL3A1, CPNE5, CPNE6, CRABP2, CRYGB, CSF1, CUL7, DACT2, DLX5, DPYSL4, DTX1, EFHD1, EFNB1, ETV4, F2, FES, FGF8, FGFR2, FN1, FOSL2, FSCN2, FSHR, FZD2, GAP43, GATA2, GDF5, GDF6, GDF9, GFAP, GHRHR, GNAT2, GORASP1, GPR68, HNF1B,…	0.000186807	GO:0003774	motor activity	[Group0]	[CENPE, DNAH11, KIF12, KIF18A, KIF20A, KIF23, KIF2C, KIF3B, KIF4A, KIFC1, KLC2, MYH1, MYH10, MYH2, MYH3, MYH7, MYO19, MYO1A, MYO1D, MYO7B]	0.00262712
GO:0007268	synaptic transmission	[Group64]	[ADGRL1, ADIPOQ, CACNA1A, CACNA1B, CACNA1G, CACNB1, CACNB4, CARTPT, CHRM1, CHRM4, CHRM5, CHRNA10, CHRNB4, CHRND, CLSTN1, CPLX2, DMPK, DNM1, GABRA3, GABRD, GABRP, GFAP, GRIA3, GRID1, HCRTR1, HTR1B, HTR4, HTT, MYLK2, NPAS4, P2RX2, PLCB3, PNOC, RAB3A, RAC3, SHC3, SLC6A1, SLC6A2, SLC6A3, SLC6A4, SLC6A9, SNCB, SNCG, STAC3, SYN1, SYNGAP1, SYNGR1, SYT1, TH, USP14]	0.000294262	GO:0008331	high voltage-gated calcium channel activity	[Group1]	[CACNA1A, CACNA1B, CACNA1E, CACNA1S, CACNB1, CACNB4]	0.00296167
GO:0098662	inorganic cation transmembrane transport	[Group18]	[ACTN2, AQP1, ASPH, ATP1A3, ATP1B2, ATP5B, ATP5G1, ATP6V0E2, ATP6V1B2, CACNA1A, CACNA1B, CACNA1E, CACNA1G, CACNA1H, CACNA1I, CACNA1S, CACNB1, CACNB4, CACNG4, CACNG6, COX6A2, COX8B, FXYD3, FXYD7, GPD1L, HCN4, HRC, HTT, IGF1, KCNB2, KCNE1, KCNF1, KCNIP2, KCNJ16, KCNT1, KEL, NDUFA4, OPRM1, ORAI1, PDE4D, RHAG, RYR3, SCNN1B, SLC12A1, SLC12A3, SLC12A8, SLC24A1, SLC34A2, SLC4A11, SLC6A3, SLC9A1, SLC9A3,…	0.000294463	GO:0072509	divalent inorganic cation transmembrane transporter activity	[Group1]	[CACNA1A, CACNA1B, CACNA1E, CACNA1G, CACNA1H, CACNA1I, CACNA1S, CACNB1, CACNB4, CACNG4, CACNG6, MRS2, OPRM1, ORAI1, RYR3, SLC24A1, TRPC2, TRPC5, TRPM4, TRPV4, TRPV6]	0.00411354
GO:0070588	calcium ion transmembrane transport	[Group18, Group5]	[ASPH, CACNA1A, CACNA1B, CACNA1E, CACNA1G, CACNA1H, CACNA1I, CACNA1S, CACNB1, CACNB4, CACNG4, CACNG6, HRC, HTT, OPRM1, ORAI1, PDE4D, RYR3, SLC24A1, SLC9A1, TRPC2, TRPC5, TRPM4, TRPV4, TRPV6]	0.000302137	GO:0005509	calcium ion binding	[Group2]	[ACTN2, ACTN3, ALOX15B, ANXA10, BGLAP, CABP2, CACNA1B, CACNA1E, CANT1, CAPN8, CBLB, CCDC47, CDH23, CDH26, CDHR1, CDHR2, CELSR2, CLSTN1, DLK2, EFEMP2, EFHC1, EFHD1, EGFL8, F2, FAT1, FKBP10, HRC, ITGB1BP2, KCNIP2, LDLR, LPO, LRP8, MASP2, MMP14, MMP15, MYL3, MYL4, MYL6B, NOTCH4, PCDH12, PEF1, PLA2G1B, PLA2G2A, PLCB3, PLCG1, PLCH2, PPP3R1, RASGRP4, REPS2, RYR3, SCGN, SEPN1, SGCA, SHH, SLC24A1, SNCB, …	0.00412885
GO:2000241	regulation of reproductive process	[Group20, Group45]	[APC, ASPM, BMP7, CACNA1H, EAF2, FGFR2, GDF9, GH1, IGF1, INSR, LIF, MOS, NPPC, NR5A1, OVOL1, PPP2R1A, RNASE10, RSPO1, SHH, SOX10, TEKT3, ZP3]	0.000327368	GO:0015293	symporter activity	[Group8]	[HTT, SLC12A1, SLC12A3, SLC12A8, SLC13A3, SLC24A1, SLC34A2, SLC5A11, SLC6A1, SLC6A17, SLC6A19, SLC6A2, SLC6A3, SLC6A4, SLC6A8, SLC6A9]	0.00694982
GO:0048869	cellular developmental process	[Group54]	[ACTN2, ACTN3, ADAM15, ADCY1, ADIPOQ, AFG3L2, AGR2, AKT2, ALDH6A1, ALDOC, ALOX15B, ANPEP, APC, ASCL2, ASPM, ATN1, ATP5B, AXIN1, BCL2, BEND6, BGLAP, BMP7, BSCL2, CACNA1A, CACNA1S, CACNB4, CAMSAP2, CARD11, CCDC114, CCDC47, CCDC85B, CCHCR1, CCL3, CD28, CD79A, CDH23, CDK1, CDKN1C, CELA1, CELSR2, CLPTM1, CNGB1, CNOT3, COL11A1, COL1A1, COL2A1, COL3A1, COL6A1, CPNE5, CPNE6, CR2, CRABP2, CRYGB, CSF1, CSP…	0.000415734	GO:0015294	solute:cation symporter activity	[Group8]	[HTT, SLC12A1, SLC12A3, SLC12A8, SLC13A3, SLC34A2, SLC6A1, SLC6A17, SLC6A19, SLC6A2, SLC6A3, SLC6A4, SLC6A8, SLC6A9]	0.00709639
GO:0006936	muscle contraction	[Group29]	[ACTN2, ACTN3, ADRA1B, ADRBK1, CACNA1S, CHRNB4, DMPK, EDN2, GPD1L, HCN4, HRC, MYBPC1, MYBPC3, MYH3, MYH7, MYL3, MYL4, MYLK2, P2RX2, PDE4D, PRKCA, PRKG1, RYR3, SLC9A1, SMAD5, STAC3, TAZ, TCAP, TMOD1, TNNC1, TNNC2, TNNT1, TNNT2]	0.000471375	GO:0015370	solute:sodium symporter activity	[Group8]	[HTT, SLC13A3, SLC6A1, SLC6A17, SLC6A19, SLC6A2, SLC6A3, SLC6A4, SLC6A8, SLC6A9]	0.0107931
GO:0003012	muscle system process	[Group2, Group29]	[ACTN2, ACTN3, ADRA1B, ADRBK1, CACNA1S, CHRNB4, DMPK, EDN2, GPD1L, GTF2IRD1, HCN4, HRC, IGF1, MYBPC1, MYBPC3, MYH3, MYH7, MYL3, MYL4, MYLK2, MYOD1, MYOG, P2RX2, PDE4D, PI16, PRKCA, PRKG1, RYR3, SEPN1, SLC9A1, SMAD5, STAC3, TAZ, TCAP, TMOD1, TNNC1, TNNC2, TNNT1, TNNT2]	0.000475778	GO:0005078	MAP-kinase scaffold activity	[Group12]	[KSR1, KSR2, MAPK8IP1, MAPK8IP3]	0.0117627
GO:1903522	regulation of blood circulation	[Group29, Group41]	[ADRA1B, ADRBK1, AVPR1B, AVPR2, CACNA1B, CACNA1E, CACNA1G, DBH, DMPK, EDN2, FGB, GPD1L, HCN4, HRC, KCNE1, MYBPC3, MYH7, MYL3, MYL4, OXTR, P2RY2, PDE4D, PRKCA, SLC9A1, SMTNL1, TH, TNNT2, TRPM4]	0.000489365	GO:0015079	potassium ion transmembrane transporter activity	[Group1, Group8]	[AQP1, ATP1A3, ATP1B2, CNGA1, CNGB1, HCN4, KCNB2, KCNE1, KCNF1, KCNJ16, KCNN3, KCNT1, SLC12A1, SLC12A3, SLC12A8, SLC24A1]	0.0120745
GO:0055085	transmembrane transport	[Group18]	[ABCG2, ACTN2, AFG3L2, AKT2, AQP1, ASPH, ATP13A2, ATP13A4, ATP1A3, ATP1B2, ATP5B, ATP5G1, ATP6V0E2, ATP6V1B2, BCL2, BEST1, CACNA1A, CACNA1B, CACNA1E, CACNA1G, CACNA1H, CACNA1I, CACNA1S, CACNB1, CACNB4, CACNG4, CACNG6, CHRNA10, CHRNB4, CHRND, CLCA3, CNGA1, CNGB1, COX6A2, COX8B, FXYD3, FXYD7, GABRA3, GABRD, GABRP, GJB2, GPD1L, GRIA3, GRID1, HCN4, HRC, HTT, IGF1, KCNB2, KCNE1, KCNF1, KCNIP2, KCNJ16,…	0.000494128	GO:0008092	cytoskeletal protein binding	[Group5]	[ACTN2, ACTN3, ALDOC, ALKBH4, APC, CAMSAP2, CAPN6, CENPE, CLSTN1, COTL1, DBN1, DYRK1B, EGFR, EPB41L1, FABP3, FES, FHL3, FSCN1, FSCN2, HTT, IQGAP3, JAKMIP1, KATNB1, KIF12, KIF18A, KIF20A, KIF23, KIF2C, KIF3B, KIF4A, KIFC1, KLHL33, LOC538493, MAP1A, MAP1LC3C, MAP4, MAPK8IP1, MAPK8IP3, MAPT, MKL1, MYBPC1, MYBPC3, MYH1, MYH10, MYH2, MYH3, MYH7, MYL3, MYL4, MYO19, MYO1A, MYO1D, MYOZ2, MYPN, PLK1, PRC1…	0.0131494
GO:0007517	muscle organ development	[Group2]	[ACTN3, BCL2, CACNA1S, CHRND, CNTFR, COL11A1, COL3A1, DISP1, EGR1, ELN, FGF8, FGFR2, FOXL2, FZD2, HOXD9, KEL, LEMD2, LIF, MEF2D, MSC, MYBPC3, MYH7, MYL3, MYLK2, MYOD1, MYOG, NRG1, P2RX2, PI16, SEPN1, SHH, SIX1, SMTNL1, STAC3, STRA6, TAZ, TCAP, TNNC1, TNNT2, TP73]	0.000512954	GO:0003777	microtubule motor activity	[Group0]	[CENPE, DNAH11, KIF12, KIF18A, KIF20A, KIF23, KIF2C, KIF3B, KIF4A, KIFC1, KLC2]	0.0187324
GO:0050879	multicellular organismal movement	[Group29, Group33]	[ACTN3, CACNA1A, CHRND, DMPK, HIPK2, MYH3, MYH7, STAC3, TCAP, TNNC2, TNNT1, VPS54]	0.000523155	GO:0008332	low voltage-gated calcium channel activity	[Group1]	[CACNA1G, CACNA1H, CACNA1I]	0.0192705
GO:0050881	musculoskeletal movement	[Group29, Group33]	[ACTN3, CACNA1A, CHRND, DMPK, HIPK2, MYH3, MYH7, STAC3, TCAP, TNNC2, TNNT1, VPS54]	0.000523155	GO:0005179	hormone activity	[Group13]	[ADIPOQ, APLN, AVP, EDN2, FSHB, GH1, IGF1, INHA, LEP, LHB, NPPC, PRLH, PRP6, SSPO, TG, TSHB]	0.0193843
GO:0040008	regulation of growth	[Group21, Group54]	[ACTN3, ADAM15, AFG3L2, AGR2, ALOX15B, BCL2, CCDC85B, CDHR2, CLSTN1, COLQ, CPNE5, CPNE6, CRABP2, CSF1, DMPK, EAF2, ELANE, EXOSC4, F2, FGF8, FGFR2, FN1, GAP43, GDF5, GDF9, GH1, GHRHR, GNAS, HNF1B, HTT, HYAL2, IGF1, IL7, INSR, LEP, MAPT, MBD5, MMP14, MYOD1, NCOR1, NPPC, NRG1, OSGIN1, PEX5, PI16, PLXNA3, PLXNA4, PPARD, PRLH, SEMA4B, SEMA5B, SEMA6B, SFN, SIX1, SLC6A3, SLC6A4, SMARCA4, SYT1, SYT17, SY…	0.000536703	GO:0048407	platelet-derived growth factor binding	[Group11]	[COL1A1, COL2A1, COL3A1, COL6A1, PDGFRA]	0.0220864
GO:0048562	embryonic organ morphogenesis	[Group37, Group54]	[AXIN1, BMP7, CDH23, CHRNA10, COL11A1, COL2A1, DLX5, DVL3, FGF8, FGFR2, FOXL2, FZD2, GATA2, GNAS, HIPK2, HNF1B, HOXA5, HOXB7, HOXD9, MDFI, MFAP2, MMP14, OSR2, PAX6, PDGFRA, SHH, SIX1, SOBP, SOX10, STIL, STRA6, TBX3, TCAP, TFAP2A, TH, TSHR]	0.000542225	GO:0005221	intracellular cyclic nucleotide activated cation channel activity	[Group10]	[AQP1, CNGA1, CNGB1, HCN4]	0.025293
GO:0060047	heart contraction	[Group29]	[ACE, ADRA1B, ADRBK1, CACNA1B, CACNA1E, CACNA1G, DMPK, EDN2, GPD1L, HCN4, HRC, KCNE1, MYBPC3, MYH7, MYL3, MYL4, PDE4D, PRKCA, SLC9A1, SMAD5, TAZ, TCAP, TH, TNNC1, TNNT2, TRPM4]	0.00055632	GO:0008504	monoamine transmembrane transporter activity	[Group8]	[HTT, SLC6A2, SLC6A3, SLC6A4]	0.025293
GO:0000280	nuclear division	[Group44, Group57]	[APC, ASPM, AURKB, BMP7, BUB1, CCNA2, CCNF, CD28, CDC6, CDCA5, CDCA8, CDK1, CENPE, CENPN, CUL7, ENSA, ESPL1, FANCA, FGF8, FGFR2, FSD1, IGF1, INSR, KATNB1, KIF18A, KIF23, KIF2C, KIF3B, KIFC1, LIF, MEI1, MKI67, MOS, MYBL2, NCAPH, PLK1, POGZ, PPP2R1A, RAD51B, RCC1, RECQL5, RSPO1, SKA3, SPAG5, SPC24, SPIRE2, STAG3, TADA3, TDRKH, TEX14, TOP2A, TPR, TUBGCP6, UBE2C, UBE2S, ZWILCH]	0.000569135	GO:0043855	cyclic nucleotide-gated ion channel activity	[Group10]	[AQP1, CNGA1, CNGB1, HCN4]	0.025293
GO:0003015	heart process	[Group29]	[ACE, ADRA1B, ADRBK1, CACNA1B, CACNA1E, CACNA1G, DMPK, EDN2, GPD1L, HCN4, HRC, KCNE1, MYBPC3, MYH7, MYL3, MYL4, PDE4D, PRKCA, SLC9A1, SMAD5, TAZ, TCAP, TH, TNNC1, TNNT2, TRPM4]	0.000676584	GO:0008083	growth factor activity	[Group4]	[BMP7, CD320, CSF1, FGF1, FGF11, FGF8, GDF5, GDF6, GDF9, IGF1, IL34, IL7, INHA, LEP, LIF, NRG1, OSGIN1, PGF]	0.0257043
GO:0060537	muscle tissue development	[Group2, Group54]	[ACTN2, ACTN3, BCL2, CACNA1S, CHRND, COL11A1, COL3A1, EGR1, ELN, EYA2, FGF8, FGFR2, FOXL2, HOXD9, IFT20, KEL, LEMD2, MEF2D, MSC, MYBPC3, MYH10, MYH7, MYL3, MYLK2, MYOD1, MYOG, NOX4, NPRL3, NRG1, P2RX2, PDGFRA, PI16, SEPN1, SHH, SIX1, SLC9A1, SOX10, STAC3, STRA6, TAZ, TBX3, TCAP, TNNC1, TNNT2, TP73]	0.000691883	GO:0004222	metalloendopeptidase activity	[Group7]	[ADAM15, ADAM33, ADAMTS8, AFG3L2, ECE2, KEL, MBTPS2, MEP1B, MMP14, MMP15, MMP2, MMP23B, PMPCA, RCE1, TLL2]	0.0273903
GO:0048285	organelle fission	[Group44, Group57]	[APC, ASPM, AURKB, BMP7, BUB1, CCNA2, CCNF, CD28, CDC6, CDCA5, CDCA8, CDK1, CENPE, CENPN, CUL7, ENSA, ESPL1, FANCA, FGF8, FGFR2, FIS1, FSD1, IGF1, INSR, KATNB1, KIF18A, KIF23, KIF2C, KIF3B, KIFC1, LIF, LOC538493, MEI1, MKI67, MOS, MYBL2, NCAPH, PEX11B, PLK1, POGZ, PPP2R1A, RAD51B, RCC1, RECQL5, RSPO1, SKA3, SPAG5, SPC24, SPIRE2, STAG3, TADA3, TDRKH, TEX14, TOP2A, TPR, TUBGCP6, UBE2C, UBE2S, ZWILC…	0.000694417	GO:0030551	cyclic nucleotide binding	[Group10]	[CNGA1, CNGB1, HCN4, PDE4A, PDE4D, PDE6G, PRKG1]	0.0332285
GO:0009187	cyclic nucleotide metabolic process	[Group11]	[ADCY1, AIPL1, AQP1, AVP, CACNB4, CHRM1, CHRM4, CHRM5, CXCR3, FSHR, FZD2, GHRHR, GNAS, GPR161, GUCA2A, HTR1B, HTR4, NPPC, NPR2, OPRM1, PALM, PDE1B, PDE4D, PRKCA, RORA, THBS1, TSHR]	0.000922276	GO:0015297	antiporter activity	[Group8]	[LAT, SLC22A6, SLC22A8, SLC24A1, SLC37A4, SLC4A11, SLC4A3, SLC9A1, SLC9A3, SLC9A5]	0.0338761
GO:0022008	neurogenesis	[Group54]	[ADCY1, AFG3L2, AKT2, APC, ASPM, ATN1, AXIN1, BCL2, BEND6, BMP7, CACNA1A, CAMSAP2, CCL3, CDH23, CDKN1C, CELSR2, CNGB1, COL3A1, CPNE5, CPNE6, CRABP2, CSF1, CSPG4, DAGLA, DBN1, DLX5, DPYSL4, DTX1, EFHD1, EFNB1, EMX2, ETV4, F2, FES, FGF8, FGFR2, FN1, FSCN2, FSHR, FZD2, FZD9, GAP43, GATA2, GCM1, GDF6, GFAP, GNAT2, GORASP1, HIPK2, HOXD9, HTT, IFT20, IGF1, KCNIP2, KEL, LAMA1, LAMC1, LAMC3, LDB1, LEMD2,…	0.000924049	GO:0008519	ammonium transmembrane transporter activity	[Group8]	[AQP1, HTT, RHAG, SLC6A2, SLC6A3, SLC6A4]	0.0354955
GO:0045927	positive regulation of growth	[Group21, Group43]	[ACTN3, AGR2, BCL2, CPNE5, CPNE6, CRABP2, CSF1, EXOSC4, F2, FGF8, FGFR2, FN1, GH1, GHRHR, IGF1, IL7, INSR, LEP, MAPT, MMP14, MYOD1, NRG1, PEX5, PPARD, SFN, SLC6A3, SYT1, SYT17, SYT3, TSHR, ZP3]	0.00128081	GO:0022804	active transmembrane transporter activity	[Group1, Group8]	[ABCG2, ATP13A2, ATP13A4, ATP1A3, ATP1B2, ATP5B, ATP6V0E2, HTT, LAT, SLC12A1, SLC12A3, SLC12A8, SLC13A3, SLC22A6, SLC22A8, SLC24A1, SLC34A2, SLC37A4, SLC4A11, SLC4A3, SLC5A11, SLC6A1, SLC6A17, SLC6A19, SLC6A2, SLC6A3, SLC6A4, SLC6A8, SLC6A9, SLC9A1, SLC9A3, SLC9A5, SLCO3A1]	0.038219
GO:0007399	nervous system development	[Group48, Group54]	[ADCY1, ADGRL1, AFG3L2, AKT2, APC, AQP1, ASCL2, ASPM, ATN1, AXIN1, BCAN, BCL2, BEND6, BMP7, CACNA1A, CAMSAP2, CCL3, CDH23, CDKN1C, CELSR2, CLSTN1, CNGB1, COL2A1, COL3A1, COLQ, CPNE5, CPNE6, CRABP2, CSF1, CSPG4, DAGLA, DBN1, DLX5, DPYSL4, DTX1, DVL3, ECE2, EFHC1, EFHD1, EFNB1, EGFR, EMX2, ETV4, F2, FES, FGF8, FGFR2, FN1, FSCN2, FSHR, FZD2, FZD9, GAP43, GATA2, GCM1, GDF6, GFAP, GHRHR, GNAT2, GORASP…	0.00128235	GO:0008227	G-protein coupled amine receptor activity	[Group6]	[ADRA1B, CHRM1, CHRM4, CHRM5, GPR161, HTR1A, HTR1B, HTR4]	0.04898
GO:0009887	organ morphogenesis	[Group37, Group54]	[ACP5, ACTN3, ADAM15, APC, AQP1, AXIN1, BCL2, BMP7, CDH23, CELA1, CHAD, CHRNA10, COL11A1, COL1A1, COL2A1, COL3A1, CRYGB, CSF1, DLX5, DVL3, EGFR, ETV4, FGF1, FGF8, FGFR2, FOXL2, FSCN2, FZD2, GATA2, GCNT3, GNAS, GNAT2, HIPK2, HNF1B, HOXA5, HOXB7, HOXD9, HTT, HYAL2, IGF1, IL7, INSR, ITGB4, LAMA1, LEMD2, LIF, MAP2K2, MAPK8IP3, MDFI, MEF2D, MFAP2, MKI67, MMP14, MMP2, MYBPC3, MYH7, MYL3, MYLK2, NGFR, N…	0.00128542
GO:0014706	striated muscle tissue development	[Group2, Group29]	[ACTN2, ACTN3, BCL2, CACNA1S, CHRND, COL11A1, EGR1, ELN, EYA2, FGF8, FGFR2, FOXL2, HOXD9, IFT20, KEL, LEMD2, MEF2D, MSC, MYBPC3, MYH10, MYH7, MYL3, MYLK2, MYOD1, MYOG, NOX4, NPRL3, NRG1, P2RX2, PDGFRA, PI16, SEPN1, SHH, SIX1, SLC9A1, STAC3, TAZ, TBX3, TCAP, TNNC1, TNNT2, TP73]	0.00129841
GO:0030182	neuron differentiation	[Group54]	[ADCY1, AFG3L2, APC, ASPM, ATN1, AXIN1, BCL2, BEND6, BMP7, CACNA1A, CAMSAP2, CDH23, CDKN1C, CNGB1, CPNE5, CPNE6, CRABP2, DLX5, DPYSL4, DTX1, EFHD1, EFNB1, EMX2, ETV4, FES, FGF8, FGFR2, FN1, FSCN2, FSHR, FZD2, GAP43, GATA2, GDF6, GFAP, GNAT2, GORASP1, HIPK2, HOXD9, HTT, IFT20, KCNIP2, KEL, LAMA1, LAMC1, LDB1, LEP, LIF, LINGO2, LPAR1, MAP2K2, MAP4, MAPK8IP3, MAPT, MARK2, MYH10, NFATC4, NGFR, NRG1, …	0.00130147
GO:0030001	metal ion transport	[Group18]	[ACTN2, AQP1, ASPH, ATP1A3, ATP1B2, BCL2, BEST1, CACNA1A, CACNA1B, CACNA1E, CACNA1G, CACNA1H, CACNA1I, CACNA1S, CACNB1, CACNB4, CACNG4, CACNG6, CASR, CCL21, CCL3, CNNM2, CXCR3, DMPK, F2, FXYD3, FXYD7, GCK, GH1, GPD1L, HCN4, HRC, HTT, IGF1, KCNB2, KCNE1, KCNF1, KCNIP2, KCNJ16, KCNN3, KCNT1, KEL, MRS2, OPRM1, ORAI1, PDE4D, PLCG1, RYR3, SCN5A, SCNN1B, SLC12A1, SLC12A3, SLC12A8, SLC13A3, SLC24A1, SLC…	0.00130372
GO:0048666	neuron development	[Group54]	[ADCY1, AFG3L2, APC, ATN1, BCL2, BMP7, CACNA1A, CAMSAP2, CDH23, CDKN1C, CNGB1, CPNE5, CPNE6, CRABP2, DLX5, DPYSL4, EFHD1, EFNB1, ETV4, FES, FGFR2, FN1, FSCN2, FSHR, FZD2, GAP43, GATA2, GFAP, GNAT2, GORASP1, HOXD9, HTT, IFT20, KCNIP2, KEL, LAMA1, LAMC1, LEP, LIF, LINGO2, LPAR1, MAP2K2, MAP4, MAPK8IP3, MAPT, MARK2, MYH10, NFATC4, NGFR, NRG1, NTRK1, PALM, PAX6, PLK5, PLXNA3, PLXNA4, PLXNB3, PQBP1, P…	0.00147092
GO:0042692	muscle cell differentiation	[Group2]	[ACTN2, ACTN3, AFG3L2, AXIN1, BCL2, CACNA1S, CACNB4, DMPK, DYRK1B, FGFR2, FLOT2, IFT20, IGF1, KEL, MAPK12, MKL1, MMP14, MYBPC3, MYH10, MYOD1, MYOG, MYPN, NFATC4, NMRK2, NOX4, NRG1, P2RX2, PDGFRA, PI16, PLG, PPARD, RORA, SEPN1, SHH, SIX1, SLC9A1, SOX10, STAC3, TANC1, TBX3, TCAP, TMEM8C, TMOD1, TNNT2]	0.00158569
GO:0009584	detection of visible light	[Group32]	[AIPL1, BEST1, CACNB4, CHRM1, CNGB1, GNAT2, RGS9BP, RHO, SLC24A1]	0.00160198
GO:0090596	sensory organ morphogenesis	[Group54]	[AQP1, AXIN1, BCL2, BMP7, CDH23, CHRNA10, COL11A1, COL2A1, CRYGB, DLX5, DVL3, FGF8, FGFR2, FOXL2, FSCN2, FZD2, GATA2, GNAT2, HIPK2, MFAP2, OSR2, PAX6, ROM1, RPGRIP1, SIX1, SOBP, SOX10, STRA6, TCAP, TFAP2A, TH, TSHR, VSX1]	0.00160821
GO:0048699	generation of neurons	[Group54]	[ADCY1, AFG3L2, APC, ASPM, ATN1, AXIN1, BCL2, BEND6, BMP7, CACNA1A, CAMSAP2, CDH23, CDKN1C, CELSR2, CNGB1, COL3A1, CPNE5, CPNE6, CRABP2, CSF1, DAGLA, DBN1, DLX5, DPYSL4, DTX1, EFHD1, EFNB1, EMX2, ETV4, F2, FES, FGF8, FGFR2, FN1, FSCN2, FSHR, FZD2, FZD9, GAP43, GATA2, GDF6, GFAP, GNAT2, GORASP1, HIPK2, HOXD9, HTT, IFT20, KCNIP2, KEL, LAMA1, LAMC1, LDB1, LEP, LIF, LINGO2, LPAR1, MAP2K2, MAP4, MAPK8…	0.00161886
GO:0071599	otic vesicle development	[Group20, Group54]	[COL2A1, FGF8, FGFR2, SIX1, SOX10, TCAP]	0.00200289
GO:0009653	anatomical structure morphogenesis	[Group54]	[ACP5, ACTN2, ACTN3, ADAM15, ADCY1, ADIPOQ, AFG3L2, AGR2, ANPEP, APC, AQP1, ARHGAP24, ASPH, ATN1, ATP5B, AXIN1, BCL2, BMP7, C5, CACNA1A, CACNA1S, CCDC114, CCL3, CCR3, CDH23, CDKN1C, CELA1, CELSR2, CHAD, CHRNA10, CNOT3, COL11A1, COL1A1, COL2A1, COL3A1, COL4A3, COL6A1, CPNE5, CPNE6, CRABP2, CRYGB, CSF1, CUL7, CXCR3, DACT2, DLX5, DPYSL4, DVL3, DYRK1B, EFNB1, EGFR, ETV4, F2, FES, FGF1, FGF8, FGFR2, F…	0.00206649
GO:0048644	muscle organ morphogenesis	[Group2]	[COL11A1, COL3A1, FGFR2, FZD2, LIF, MYBPC3, MYH7, MYL3, MYLK2, NRG1, SMTNL1, TCAP, TNNC1, TNNT2]	0.00226886
GO:0040014	regulation of multicellular organism growth	[Group21]	[AFG3L2, BCL2, CSF1, FGFR2, GDF5, GH1, GHRHR, GNAS, IGF1, MBD5, NCOR1, NPPC, PEX5, PRLH, SLC6A3, TSHR]	0.00226915
GO:0007067	mitotic nuclear division	[Group57, Group60]	[APC, ASPM, AURKB, BMP7, BUB1, CCNA2, CCNF, CD28, CDC6, CDCA5, CDCA8, CDK1, CENPE, CENPN, CUL7, ENSA, ESPL1, FGF8, FGFR2, FSD1, IGF1, INSR, KATNB1, KIF18A, KIF23, KIF2C, KIF3B, KIFC1, MYBL2, NCAPH, PLK1, POGZ, PPP2R1A, RCC1, RECQL5, SKA3, SPAG5, SPC24, TADA3, TEX14, TPR, TUBGCP6, UBE2C, UBE2S, ZWILCH]	0.0022967
GO:0008016	regulation of heart contraction	[Group29]	[ADRA1B, ADRBK1, CACNA1B, CACNA1E, CACNA1G, DMPK, EDN2, GPD1L, HCN4, HRC, KCNE1, MYBPC3, MYH7, MYL3, MYL4, PDE4D, PRKCA, SLC9A1, TH, TNNT2, TRPM4]	0.00240557
GO:0007154	cell communication	[Group61]	[AAK1, ACAP1, ACTN2, ACTN3, ADAM15, ADCY1, ADGRL1, ADIPOQ, ADRA1B, ADRBK1, AFP, AGR2, AIPL1, AKT2, ALB, ALOX12B, ALOX15B, AMOTL2, APC, APLN, AQP1, ARFGEF2, ARHGAP1, ARHGAP22, ARHGAP24, ARHGAP32, ARHGEF16, ARHGEF40, ASB12, ASPH, ASPM, ATG2A, ATG4A, ATP1A3, ATXN7, AVP, AVPR1B, AVPR2, AXIN1, BCL2, BCL2L14, BEND6, BMP7, BUB1, CACNA1A, CACNA1B, CACNA1E, CACNA1G, CACNA1I, CACNB1, CACNB4, CACNG4, CANT1,…	0.00241508
GO:0051146	striated muscle cell differentiation	[Group2, Group29]	[ACTN2, ACTN3, AFG3L2, BCL2, CACNA1S, CACNB4, DMPK, DYRK1B, IFT20, IGF1, KEL, MMP14, MYBPC3, MYH10, MYOD1, MYOG, MYPN, NOX4, NRG1, P2RX2, PDGFRA, PI16, SEPN1, SHH, SLC9A1, STAC3, TANC1, TBX3, TCAP, TMEM8C, TMOD1, TNNT2]	0.00243185
GO:0055001	muscle cell development	[Group2, Group29]	[ACTN2, ACTN3, AFG3L2, AXIN1, BCL2, CACNA1S, CACNB4, IGF1, KEL, MYBPC3, MYH10, MYOD1, MYOG, MYPN, NFATC4, P2RX2, PDGFRA, PI16, SEPN1, STAC3, TBX3, TCAP, TMOD1, TNNT2]	0.00245893
GO:0003006	developmental process involved in reproduction	[Group25, Group34, Group66]	[AFP, APC, ASCL2, ASPM, BCL2, BMP7, CCNF, CDKN1C, CNTFR, CSF1, CUL7, CYP19A1, EAF2, EGFR, FANCA, FGF8, FGFR2, FOXL2, FSHR, GATA2, GCM1, GDF9, HNF1B, IGF1, INSR, KIF18A, LEP, LIF, LOC508744, MDFI, MEI1, NDP, NPPC, NR5A1, OSBP2, PCDH12, PDGFRA, PLCD3, PLG, PPARD, PPP2R1A, PRM2, RNASE10, ROBO2, SFTPA1, SHH, SIX5, SMAD5, SOHLH1, SOX10, STRA6, TARBP2, TBX3, TNP1, TSPY, TTPA, UBE2J1, YBX2, ZP3]	0.00249288
GO:0015672	monovalent inorganic cation transport	[Group18]	[ACTN2, AQP1, ATP1A3, ATP1B2, ATP5B, ATP5G1, ATP6V0E2, ATP6V1B2, CACNA1A, CHRM5, COX6A2, COX8B, DMPK, FXYD3, FXYD7, GCK, GH1, GPD1L, HCN4, HTR1A, HTR1B, HTT, IGF1, KCNB2, KCNE1, KCNF1, KCNIP2, KCNJ16, KCNN3, KCNT1, KEL, NDUFA4, RHAG, SCN5A, SCNN1B, SLC12A1, SLC12A3, SLC12A8, SLC13A3, SLC24A1, SLC34A2, SLC4A11, SLC5A10, SLC5A11, SLC6A2, SLC6A3, SLC6A4, SLC6A8, SLC9A1, SLC9A3, SLC9A5, SNCG]	0.00250609
GO:0009582	detection of abiotic stimulus	[Group32]	[AIPL1, BEST1, CACNB4, CHRM1, CHRNA10, CNGB1, COL11A1, GNAT2, NGFR, OPN1LW, PDE6B, PIEZO1, RGS9BP, RHO, SLC24A1, TCAP]	0.00260033
GO:0001655	urogenital system development	[Group13, Group20, Group34]	[ADIPOQ, APC, AQP1, BCL2, BMP7, CDKN1C, COL4A3, COL4A4, CYP19A1, DACT2, EAF2, EGR1, EMX2, FGF1, FGF8, FGFR2, GATA2, GCNT3, HNF1B, HOXB7, IFT20, IGF1, ITGB4, LIF, OSR2, OVOL1, PDGFRA, PGF, ROBO2, SFTPA1, SHH, SIX1, SLC12A1, SMAD5, SOX10, STRA6, TFAP2A]	0.00263375
GO:0030799	regulation of cyclic nucleotide metabolic process	[Group11]	[AIPL1, AVP, CHRM1, CHRM4, CHRM5, CXCR3, FSHR, FZD2, GHRHR, GNAS, GPR161, GUCA2A, HTR1B, HTR4, NPPC, OPRM1, PALM, PDE4D, PRKCA, THBS1, TSHR]	0.00266853
GO:0000226	microtubule cytoskeleton organization	[Group14, Group57, Group60]	[APC, ASPM, ATXN7, AURKB, AXIN1, CAMSAP2, CAPN6, CCDC114, CCNF, CENPE, CEP76, CHD3, CKAP2, CUL7, ESPL1, FES, HTT, HYDIN, KATNB1, KIF18A, KIF20A, KIF23, KIF2C, KIF3B, KIFC1, MAP1A, MAP4, MAPT, MYBL2, NCOR1, PARD3, PAX6, PHLDB1, PLK1, PPP2R1A, PRC1, RCC1, RSPH9, SKA3, SMN2, SPAG5, SPIRE2, STIL, STMN3, STMN4, SYNE4, TEX14, TPPP, TPR, TRIM54, TUBGCP6, WDR62]	0.00267064
GO:0055002	striated muscle cell development	[Group2, Group29]	[ACTN2, ACTN3, AFG3L2, BCL2, CACNA1S, CACNB4, IGF1, KEL, MYBPC3, MYH10, MYOD1, MYOG, MYPN, P2RX2, PDGFRA, PI16, SEPN1, STAC3, TBX3, TCAP, TMOD1, TNNT2]	0.00298399
GO:0003009	skeletal muscle contraction	[Group2, Group29, Group33]	[ACTN3, DMPK, MYH3, MYH7, STAC3, TCAP, TNNC2, TNNT1]	0.00301263
GO:0000165	MAPK cascade	[Group27]	[ADIPOQ, ADRA1B, ALOX12B, APC, AVP, AXIN1, BMP7, CARD9, CARTPT, CASR, CCL21, CCL25, CCL3, CSPG4, DVL3, EGFR, FGB, FGF1, FGF8, FGFR2, FLT4, FN1, FOXM1, FSHR, GDF5, GDF6, GDF9, GH1, HIPK2, HYAL2, IGF1, INHA, INSR, IQGAP3, KSR1, KSR2, LEMD2, LIF, LPAR1, MAP2K2, MAP2K7, MAP3K11, MAP3K12, MAP3K6, MAPK12, MAPK13, MAPK8IP1, MAPK8IP3, MDFI, NCOR1, NGFR, NLRP6, NOX4, NRG1, NTRK1, OPRM1, PDE6G, PDGFRA, PRK…	0.00302106
GO:0048704	embryonic skeletal system morphogenesis	[Group37, Group54]	[AXIN1, BMP7, COL11A1, COL2A1, FGFR2, GNAS, HOXA5, HOXB7, HOXD9, MDFI, MMP14, OSR2, PDGFRA, SIX1, TFAP2A]	0.00304226
GO:0090257	regulation of muscle system process	[Group2, Group29]	[ACTN3, ADRA1B, ADRBK1, CHRNB4, DMPK, EDN2, GPD1L, GTF2IRD1, HCN4, HRC, IGF1, MYH7, MYL3, MYLK2, MYOG, PDE4D, PI16, PRKCA, PRKG1, SEPN1, SLC9A1, TNNC1, TNNT1, TNNT2]	0.00310506
GO:0009581	detection of external stimulus	[Group32]	[AIPL1, BEST1, CACNB4, CHRM1, CHRNA10, CNGB1, COL11A1, GNAT2, NGFR, OPN1LW, PDE6B, PIEZO1, RGS9BP, RHO, SLC24A1, TCAP]	0.00312223
GO:0042472	inner ear morphogenesis	[Group20, Group54]	[CDH23, CHRNA10, COL11A1, COL2A1, DLX5, DVL3, FGF8, FGFR2, FZD2, GATA2, SIX1, SOBP, SOX10, TCAP, TFAP2A, TSHR]	0.00312223
GO:0006814	sodium ion transport	[Group18]	[ATP1A3, ATP1B2, DMPK, FXYD3, FXYD7, GH1, GPD1L, HCN4, IGF1, SCN5A, SCNN1B, SLC12A1, SLC12A3, SLC13A3, SLC24A1, SLC34A2, SLC4A11, SLC5A10, SLC5A11, SLC6A8, SLC9A1, SLC9A3, SLC9A5]	0.00329322
GO:0007423	sensory organ development	[Group54]	[APC, AQP1, AXIN1, BCL2, BMP7, CACNA1S, CDH23, CDKN1C, CHRNA10, COL11A1, COL2A1, CRYBA2, CRYBB2, CRYGB, DLX5, DVL3, FGF8, FGFR2, FOXL2, FSCN2, FZD2, GATA2, GNAT2, HIPK2, IGF1, LAMA1, LAMC3, MFAP2, MIP, MYH10, NDP, OSR2, PAX6, PDE6B, PDGFRA, PRPH2, RHO, ROM1, RPGRIP1, SHH, SIX1, SIX5, SMARCA4, SOBP, SOX10, STRA6, TCAP, TFAP2A, TH, TMOD1, TSHR, VSX1]	0.00359077
GO:0051240	positive regulation of multicellular organismal process	[Group43, Group54]	[ACTN3, ADGRL1, ADIPOQ, ADRA1B, AGPAT1, ALOX12B, ALOX15B, AQP1, ARFGEF2, ASPM, AVPR1B, AVPR2, BCL2, BEND6, BMP7, C5, CARD11, CARD9, CARTPT, CBLB, CCL3, CCR3, CD2, CD28, CHRNB4, CLSTN1, COL1A1, CPNE5, CPNE6, CRABP2, CSF1, CXCR3, DBH, EDN2, EGR1, ELANE, F2, FES, FGB, FGF1, FGF8, FGFR2, FLT4, FN1, GATA2, GDF5, GDF6, GFAP, GH1, GHRHR, GNAS, GPR68, HDAC7, HIPK2, HOXA5, HOXB7, HRC, HYAL2, ICOSLG, IGF1,…	0.00363026
GO:0051339	regulation of lyase activity	[Group11]	[CHRM1, CHRM4, CHRM5, FSHR, GPR161, GUCA2A, HTR4, MTRR, OPRM1, PALM, PHPT1, PRKCA, TSHR]	0.0038329
GO:0014857	regulation of skeletal muscle cell proliferation	[Group1, Group20]	[MYOG, PPARD, SEPN1, SHH, SIX1, SIX5]	0.00384317
GO:0048706	embryonic skeletal system development	[Group24, Group37, Group54]	[AXIN1, BMP7, COL11A1, COL1A1, COL2A1, FGFR2, GNAS, HOXA5, HOXB7, HOXC6, HOXD9, MDFI, MMP14, OSR2, PDGFRA, SHH, SIX1, TFAP2A]	0.00384684
GO:0060174	limb bud formation	[Group20]	[COL2A1, FGFR2, SHH, SOX10]	0.00408894
GO:0044702	single organism reproductive process	[Group25, Group34]	[ACE, AFP, APC, ASCL2, ASPM, BCL2, BMP7, CACNA1H, CCNF, CDKN1C, CELF3, CUL7, CYP19A1, EAF2, EGFR, ESPL1, FANCA, FGF8, FGFR2, FOXL2, FSHR, GATA2, GCM1, GDF9, HNF1B, HOXD9, HSF1, HSF2BP, HTT, IGF1, INSR, KIF18A, LEP, LIF, LOC508744, MDFI, MEI1, MKI67, MMP2, MOS, NDP, NLRP5, NPPC, NR5A1, ODF1, OSBP2, OVOL1, PCDH12, PDGFRA, PLCD3, PLG, PLK1, PPARD, PPP2R1A, PRM2, RAD51B, RNASE10, ROBO2, RSPO1, SBF1, …	0.00462297
GO:0009583	detection of light stimulus	[Group32]	[AIPL1, BEST1, CACNB4, CHRM1, CNGB1, GNAT2, OPN1LW, PDE6B, RGS9BP, RHO, SLC24A1]	0.00478628
GO:0048608	reproductive structure development	[Group13, Group20, Group25, Group34, Group54]	[AFP, APC, ASCL2, ASPM, BCL2, BMP7, CCNF, CDKN1C, CUL7, CYP19A1, EAF2, EGFR, FANCA, FGF8, FGFR2, FOXL2, FSHR, GATA2, GCM1, GDF9, HNF1B, IGF1, INSR, KIF18A, LEP, LIF, MDFI, NDP, NR5A1, PCDH12, PDGFRA, PLCD3, PLG, PPARD, RNASE10, ROBO2, SFTPA1, SHH, SOHLH1, SOX10, STRA6, TBX3, TSPY, TTPA, ZP3]	0.00500116
GO:0042471	ear morphogenesis	[Group20, Group54]	[CDH23, CHRNA10, COL11A1, COL2A1, DLX5, DVL3, FGF8, FGFR2, FZD2, GATA2, OSR2, SIX1, SOBP, SOX10, TCAP, TFAP2A, TSHR]	0.00578151
GO:0055074	calcium ion homeostasis	[Group18]	[ADRA1B, ASPH, ATP13A2, ATP13A4, BCL2, CACNB4, CASR, CCDC47, CCKBR, CCL21, CCL3, CHRNA10, CXCR3, DMPK, EDN2, F2, FIS1, GRINA, HRC, KEL, LPAR1, OPRM1, PDE4D, PDE6B, PDGFRA, PLCG1, PRKCA, RYR3, SCGN, SLC24A1, SLC37A4, TRPC2, TRPC5, TRPV4]	0.00579395
GO:0051094	positive regulation of developmental process	[Group21, Group43, Group54]	[ACTN3, ADGRL1, ADIPOQ, AGR2, ALOX15B, APC, AQP1, ASPM, BCL2, BEND6, BMP7, C5, CBLB, CCR3, CD28, CLSTN1, COL1A1, CPNE5, CPNE6, CRABP2, CSF1, CXCR3, DMBT1, EGR1, FES, FGF1, FGF8, FGFR2, FIS1, FN1, GATA2, GCM1, GDF5, GDF6, GFAP, GH1, GHRHR, GNAS, GPR68, HDAC7, HIPK2, HOXA5, HOXB7, HTT, IGF1, IL34, IL7, INSR, IQGAP3, JUND, LEP, LIF, LINGO2, MAP2K2, MAPT, MARK2, MMP14, MYOD1, MYOG, NGFR, NOTCH4, NR5A…	0.00594957
GO:0046058	cAMP metabolic process	[Group11]	[ADCY1, AVP, CACNB4, CHRM1, CHRM4, CHRM5, CXCR3, FSHR, GHRHR, GNAS, GPR161, HTR1B, HTR4, NPPC, OPRM1, PALM, PDE1B, PDE4D, PRKCA, TSHR]	0.00599578
GO:0061458	reproductive system development	[Group13, Group20, Group25, Group34, Group54]	[AFP, APC, ASCL2, ASPM, BCL2, BMP7, CCNF, CDKN1C, CUL7, CYP19A1, EAF2, EGFR, FANCA, FGF8, FGFR2, FOXL2, FSHR, GATA2, GCM1, GDF9, HNF1B, IGF1, INSR, KIF18A, LEP, LIF, MDFI, NDP, NR5A1, PCDH12, PDGFRA, PLCD3, PLG, PPARD, RNASE10, ROBO2, SFTPA1, SHH, SOHLH1, SOX10, STRA6, TBX3, TSPY, TTPA, ZP3]	0.00599981
GO:0042310	vasoconstriction	[Group29, Group41]	[ADRA1B, AVP, AVPR1B, AVPR2, DBH, ECE2, EDN2, FGB, HTR1A, HTR1B, OXTR, SMTNL1, TRPM4]	0.00602897
GO:0043269	regulation of ion transport	[Group18]	[ACTN2, AKT2, ASPH, ATP1B2, BCL2, BEST1, CACNA1A, CACNA1B, CACNA1E, CACNA1G, CACNA1H, CACNA1I, CACNA1S, CACNB1, CACNB4, CACNG4, CACNG6, CASR, CCL3, CHRM1, CXCR3, DMPK, F2, FXYD3, FXYD7, GCK, GPD1L, HRC, HTR1A, HTR1B, HTT, IGF1, KCNB2, KCNF1, KCNJ16, KEL, OPRM1, ORAI1, PDE4D, PLCG1, PRKCD, SCN5A, SFRP4, SLC9A1, SNCG, THBS1, ZP3]	0.00603264
GO:0006937	regulation of muscle contraction	[Group29]	[ACTN3, ADRA1B, ADRBK1, CHRNB4, DMPK, EDN2, GPD1L, HCN4, HRC, MYH7, MYL3, MYLK2, PDE4D, PRKCA, PRKG1, SLC9A1, TNNC1, TNNT1, TNNT2]	0.00604175
GO:0006874	cellular calcium ion homeostasis	[Group18]	[ADRA1B, ASPH, ATP13A2, ATP13A4, BCL2, CACNB4, CASR, CCKBR, CCL21, CCL3, CHRNA10, CXCR3, DMPK, EDN2, F2, FIS1, GRINA, HRC, KEL, LPAR1, OPRM1, PDE4D, PDE6B, PDGFRA, PLCG1, PRKCA, RYR3, SCGN, SLC24A1, SLC37A4, TRPC2, TRPC5, TRPV4]	0.00604189
GO:0007019	microtubule depolymerization	[Group14]	[APC, AURKB, CKAP2, KATNB1, KIF18A, KIF2C, SMN2, STMN3, STMN4, SYNE4, TRIM54]	0.0060465
GO:0072001	renal system development	[Group20]	[ADIPOQ, APC, AQP1, BCL2, BMP7, CDKN1C, COL4A3, COL4A4, DACT2, EGR1, EMX2, FGF1, FGF8, FGFR2, GCNT3, HNF1B, HOXB7, IFT20, ITGB4, LIF, OSR2, OVOL1, PDGFRA, PGF, ROBO2, SHH, SIX1, SLC12A1, SMAD5, SOX10, STRA6, TFAP2A]	0.00605866
GO:1900542	regulation of purine nucleotide metabolic process	[Group11]	[ACTN3, AIPL1, AVP, CHRM1, CHRM4, CHRM5, CXCR3, FSHR, FZD2, GHRHR, GNAS, GPR161, GUCA2A, HTR1B, HTR4, IGF1, INSR, NCOR1, NPPC, OPRM1, PALM, PDE4D, PPARA, PRKCA, THBS1, TSHR]	0.0060917
GO:0045907	positive regulation of vasoconstriction	[Group41]	[ADRA1B, AVPR1B, AVPR2, DBH, FGB, OXTR, SMTNL1]	0.00609257
GO:0035264	multicellular organism growth	[Group21]	[AFG3L2, BCL2, CDKN1C, CELA1, CSF1, FGFR2, GDF5, GH1, GHRHR, GNAS, HOXA5, IGF1, MBD5, NCOR1, NPPC, PDE4D, PEX5, PRLH, SELM, SLC6A3, SPTBN2, STIL, STK40, TARBP2, TSHR]	0.00617814
GO:0045761	regulation of adenylate cyclase activity	[Group11, Group63]	[CHRM1, CHRM4, CHRM5, FSHR, GPR161, HTR4, OPRM1, PALM, PRKCA, TSHR]	0.00649189
GO:0007274	neuromuscular synaptic transmission	[Group65]	[CACNA1A, CHRNA10, CHRNB4, CHRND, MYLK2, P2RX2, RAB3A, STAC3]	0.00658511
GO:0086010	membrane depolarization during action potential	[Group18, Group5]	[CACNA1A, CACNA1B, CACNA1E, CACNA1G, CACNA1H, CACNA1I, CACNA1S, SCN5A]	0.00658511
GO:0060415	muscle tissue morphogenesis	[Group2]	[COL11A1, COL3A1, FGFR2, FZD2, MYBPC3, MYH7, MYL3, MYLK2, NRG1, TCAP, TNNC1, TNNT2]	0.00672382
GO:0001822	kidney development	[Group20]	[ADIPOQ, APC, AQP1, BCL2, BMP7, CDKN1C, COL4A3, COL4A4, DACT2, EGR1, FGF1, FGF8, FGFR2, GCNT3, HNF1B, HOXB7, IFT20, LIF, OSR2, OVOL1, PDGFRA, PGF, ROBO2, SHH, SIX1, SLC12A1, SMAD5, SOX10, STRA6, TFAP2A]	0.00672471
GO:0023014	signal transduction by protein phosphorylation	[Group27]	[ADIPOQ, ADRA1B, ALOX12B, APC, AVP, AXIN1, BMP7, CARD9, CARTPT, CASR, CCL21, CCL25, CCL3, CSPG4, DVL3, EGFR, FGB, FGF1, FGF8, FGFR2, FLT4, FN1, FOXM1, FSHR, GDF5, GDF6, GDF9, GH1, HIPK2, HYAL2, IGF1, INHA, INSR, IQGAP3, KSR1, KSR2, LEMD2, LIF, LPAR1, MAP2K2, MAP2K7, MAP3K11, MAP3K12, MAP3K6, MAPK12, MAPK13, MAPK8IP1, MAPK8IP3, MDFI, NCOR1, NGFR, NLRP6, NOX4, NRG1, NTRK1, OPRM1, PDE6G, PDGFRA, PRK…	0.00673078
GO:0035265	organ growth	[Group20]	[ADRA1B, BCL2, CYP19A1, DMPK, FGF8, FGFR2, HTT, IGF1, IL7, NPPC, NRG1, PI16, SFTPA1, SHH, SLC6A4, SOX10, THBS1, THBS3, TP73]	0.00673304
GO:1903047	mitotic cell cycle process	[Group57, Group60]	[APC, ASPM, AURKB, BCL2, BMP7, BUB1, CCNA2, CCNE2, CCNF, CD28, CDC6, CDCA5, CDCA8, CDK1, CENPE, CENPN, CKAP2, CUL7, DMPK, EGFR, ENSA, ESPL1, FGF8, FGFR2, FOXM1, FSD1, HTT, IGF1, INSR, IQGAP3, KATNB1, KIF18A, KIF20A, KIF23, KIF2C, KIF3B, KIFC1, KNTC1, LIG1, MAP4, MYBL2, MYH10, NCAPH, PAX6, PIM2, PLK1, PLK5, POGZ, PPP2R1A, RAD51B, RCC1, RECQL5, SKA3, SPAG5, SPC24, STIL, SYNE4, TADA3, TEX14, TJP3, T…	0.00674059
GO:0014856	skeletal muscle cell proliferation	[Group1, Group20]	[MYOG, PPARD, SEPN1, SHH, SIX1, SIX5]	0.00675599
GO:0060736	prostate gland growth	[Group20, Group50]	[CYP19A1, FGFR2, IGF1, SFTPA1, SHH, SOX10]	0.00675599
GO:0070875	positive regulation of glycogen metabolic process	[Group53]	[ADRA1B, AKT2, GCK, IGF1, INSR, IRS1]	0.00675599
GO:0050913	sensory perception of bitter taste	[Group32, Group68]	[CA6, GNAT2, LPO, REEP2, RTP3]	0.00678426
GO:2001054	negative regulation of mesenchymal cell apoptotic process	[Group20]	[BMP7, GDF5, HNF1B, SHH, SOX10]	0.00678426
GO:2000026	regulation of multicellular organismal development	[Group43, Group54]	[ACE, ACTN3, ADGRL1, ADIPOQ, ALOX15B, APC, AQP1, ASPM, BCL2, BEND6, BGLAP, BMP7, C5, CACNA1A, CARD11, CBLB, CCL3, CCR3, CD28, CHAD, CLPTM1, CLSTN1, COL1A1, COL3A1, COL4A3, COLQ, CPNE5, CPNE6, CRABP2, CSF1, CXCR3, DMBT1, DTX1, DVL3, EAF2, EGR1, ETV4, F2, FES, FGF1, FGF8, FGFR2, FN1, FSHR, FSTL3, FZD2, GATA2, GDF5, GDF6, GDF9, GFAP, GH1, GNAS, GORASP1, GPR161, GPR68, HDAC7, HIPK2, HNF1B, HOXA5, HOX…	0.00709972
GO:0001656	metanephros development	[Group20]	[ADIPOQ, AQP1, BCL2, BMP7, EGR1, FGF8, HNF1B, LIF, OSR2, PDGFRA, ROBO2, SHH, SIX1, SOX10]	0.00736734
GO:0043500	muscle adaptation	[Group2, Group29]	[ACTN3, CACNA1S, GTF2IRD1, IGF1, MYH7, MYOD1, MYOG, PI16, PRKCA, SEPN1, SLC9A1, TCAP, TNNC1, TNNT1]	0.00736734
GO:0007193	adenylate cyclase-inhibiting G-protein coupled receptor signaling pathway	[Group11, Group63]	[ADCY1, CHRM1, CHRM4, CHRM5, FSHR, GABBR1, HTR1A, HTR1B, LPAR1, OPRM1, SFTPA1]	0.00739786
GO:0001654	eye development	[Group54]	[APC, AQP1, AXIN1, BCL2, BMP7, CACNA1S, CDKN1C, CRYBA2, CRYBB2, CRYGB, FGFR2, FOXL2, FSCN2, GNAT2, HIPK2, LAMA1, LAMC3, MFAP2, MIP, MYH10, NDP, OSR2, PAX6, PDE6B, PDGFRA, PRPH2, RHO, ROM1, RPGRIP1, SHH, SIX5, SMARCA4, SOX10, STRA6, TFAP2A, TH, TMOD1, VSX1]	0.00789804
GO:0006816	calcium ion transport	[Group18]	[ASPH, BCL2, BEST1, CACNA1A, CACNA1B, CACNA1E, CACNA1G, CACNA1H, CACNA1I, CACNA1S, CACNB1, CACNB4, CACNG4, CACNG6, CASR, CCL21, CCL3, CXCR3, F2, HRC, HTT, OPRM1, ORAI1, PDE4D, PLCG1, RYR3, SLC24A1, SLC9A1, TRPC2, TRPC5, TRPM4, TRPV4, TRPV6, ZP3]	0.00828499
GO:0009416	response to light stimulus	[Group32]	[ADRA1B, AIPL1, AQP1, ATP1A3, AURKB, BCL2, BEST1, CACNA1E, CACNB4, CHRM1, CNGB1, CRTC1, DBH, EGFR, ELANE, GNAT2, HTT, HYAL2, IFT20, MAP2K7, NFATC4, OPN1LW, PDE1B, PDE6B, POLH, PPP1R1B, RGS9BP, RHO, SLC24A1, SYNGAP1, TANC1, TP73, USP28]	0.0082855
GO:0060538	skeletal muscle organ development	[Group2]	[ACTN3, BCL2, CACNA1S, CHRND, CNTFR, DISP1, EGR1, ELN, FOXL2, HOXD9, KEL, LEMD2, MEF2D, MSC, MYLK2, MYOD1, MYOG, P2RX2, SEPN1, SHH, SIX1, STAC3, STRA6, TAZ]	0.008324
GO:0043501	skeletal muscle adaptation	[Group2]	[ACTN3, CACNA1S, GTF2IRD1, MYH7, MYOD1, TNNC1, TNNT1]	0.0084634
GO:0006140	regulation of nucleotide metabolic process	[Group11]	[ACTN3, AIPL1, AVP, CHRM1, CHRM4, CHRM5, CXCR3, FSHR, FZD2, GHRHR, GNAS, GPR161, GUCA2A, HTR1B, HTR4, IGF1, INSR, NCOR1, NPPC, OPRM1, PALM, PDE4D, PPARA, PRKCA, THBS1, TSHR]	0.00872716
GO:0090183	regulation of kidney development	[Group20]	[ADIPOQ, BMP7, EGR1, HNF1B, HOXB7, LIF, SHH, SIX1, SOX10]	0.00884688
GO:0050793	regulation of developmental process	[Group21, Group43, Group54]	[ACE, ACTN3, ADGRL1, ADIPOQ, AFG3L2, AGR2, ALOX15B, APC, AQP1, ASPM, AXIN1, BCL2, BEND6, BGLAP, BMP7, C5, CACNA1A, CARD11, CBLB, CCDC85B, CCL3, CCR3, CD28, CELA1, CHAD, CLPTM1, CLSTN1, CNOT3, COL1A1, COL3A1, COL4A3, COLQ, CPNE5, CPNE6, CRABP2, CSF1, CXCR3, DLK2, DMBT1, DMPK, DTX1, DVL3, EAF2, EGR1, ETV4, F2, FES, FGF1, FGF8, FGFR2, FIS1, FLOT2, FLT4, FN1, FOXM1, FSHR, FSTL3, FZD2, GATA2, GCM1, GD…	0.00894898
GO:0048265	response to pain	[Group35]	[CACNA1A, CACNA1B, CACNA1E, DBH, NTRK1, P2RX2, SLC6A2, THBS1]	0.00897351
GO:0043502	regulation of muscle adaptation	[Group2, Group29]	[ACTN3, GTF2IRD1, IGF1, MYH7, MYOG, PI16, PRKCA, SEPN1, SLC9A1, TNNC1, TNNT1]	0.00939628
GO:0051960	regulation of nervous system development	[Group43, Group54]	[ADGRL1, ASPM, BCL2, BEND6, BMP7, CACNA1A, CLSTN1, COL3A1, COLQ, CPNE5, CPNE6, CRABP2, CSF1, DTX1, DVL3, F2, FES, FN1, FZD2, GATA2, GDF6, GFAP, GORASP1, GPR161, IGF1, KEL, LIF, LINGO2, LPAR1, MAP2K2, MAPT, MARK2, NFATC4, NGFR, NRG1, NTRK1, OPRM1, PALM, PAX6, PLK5, PLXNA3, PLXNA4, PLXNB3, PQBP1, PTPRZ1, RAC3, ROBO2, SEMA4B, SEMA5B, SEMA6B, SHH, SIX1, SMN2, SOX10, SSH1, SYNGAP1, SYT1, SYT17, SYT3, …	0.00960363
GO:0043408	regulation of MAPK cascade	[Group27]	[ADIPOQ, ADRA1B, ALOX12B, APC, AXIN1, BMP7, CARD9, CARTPT, CCL21, CCL25, CCL3, CSPG4, DVL3, EGFR, FGB, FGF1, FGFR2, FLT4, FN1, FOXM1, FSHR, GDF5, GDF6, GDF9, GH1, HIPK2, HYAL2, IGF1, INHA, INSR, IQGAP3, KSR1, KSR2, LEMD2, LIF, LPAR1, MAP2K2, MAP2K7, MAP3K11, MAP3K12, MAP3K6, MAPK8IP1, MAPK8IP3, MDFI, NCOR1, NGFR, NLRP6, NOX4, NTRK1, OPRM1, PDE6G, PDGFRA, PRKCA, PRKCD, SHC2, STK40, SYNGAP1, TBC1D1…	0.00964531
GO:0030814	regulation of cAMP metabolic process	[Group11]	[AVP, CHRM1, CHRM4, CHRM5, CXCR3, FSHR, GHRHR, GNAS, GPR161, HTR1B, HTR4, NPPC, OPRM1, PALM, PDE4D, PRKCA, TSHR]	0.00982564
GO:0048568	embryonic organ development	[Group34, Group37, Group54]	[ASCL2, AXIN1, BMP7, CDH23, CDKN1C, CHRNA10, COL11A1, COL2A1, DLX5, DVL3, EGFR, FGF8, FGFR2, FOXL2, FZD2, GATA2, GCM1, GNAS, HIPK2, HNF1B, HOXA5, HOXB7, HOXD9, LIF, MDFI, MFAP2, MMP14, OSR2, PAX6, PCDH12, PDGFRA, PLCD3, PLG, SHH, SIX1, SOBP, SOX10, STIL, STRA6, TBX3, TCAP, TFAP2A, TH, TNRC6C, TSHR, TTPA]	0.0101179
GO:0014902	myotube differentiation	[Group2]	[ACTN3, BCL2, CACNA1S, DMPK, DYRK1B, IGF1, KEL, MMP14, MYOD1, MYOG, P2RX2, SEPN1, SHH, STAC3, TANC1, TMEM8C]	0.0101607
GO:0035725	sodium ion transmembrane transport	[Group18]	[ATP1A3, ATP1B2, FXYD3, FXYD7, GPD1L, HCN4, IGF1, SCNN1B, SLC12A1, SLC12A3, SLC24A1, SLC34A2, SLC4A11, SLC9A1, SLC9A3, SLC9A5]	0.0101607
GO:0043010	camera-type eye development	[Group54]	[APC, AQP1, BMP7, CACNA1S, CDKN1C, CRYBA2, CRYBB2, CRYGB, FGFR2, FOXL2, GNAT2, HIPK2, LAMA1, LAMC3, MIP, MYH10, NDP, OSR2, PAX6, PDE6B, PDGFRA, PRPH2, RHO, ROM1, RPGRIP1, SHH, SIX5, SMARCA4, SOX10, STRA6, TFAP2A, TH, TMOD1, VSX1]	0.0105686
GO:0050906	detection of stimulus involved in sensory perception	[Group32]	[BEST1, CA6, CACNB4, CHRNA10, CNGB1, COL11A1, GNAT2, LPO, RGS9BP, RTP3]	0.0105762
GO:0048738	cardiac muscle tissue development	[Group2, Group54]	[ACTN2, COL11A1, FGF8, FGFR2, IFT20, MYBPC3, MYH10, MYH7, MYL3, MYLK2, NOX4, NPRL3, NRG1, PDGFRA, PI16, SLC9A1, TAZ, TBX3, TCAP, TNNC1, TNNT2, TP73]	0.0106249
GO:0010243	response to organonitrogen compound	[Group56]	[ABAT, ADIPOQ, ADRA1B, AKT2, AQP1, ASPH, AVPR1B, AVPR2, BCL2, CARD9, CHRNA10, CHRNB4, CHRND, COL1A1, COL3A1, COL6A1, CPEB2, CYP11B1, DBH, EGFR, EGR1, GH1, GHRHR, HCN4, HCRTR1, HTR1B, IGF1, INSR, IRS1, JUND, LEP, MBD5, MMP2, OPRM1, OXTR, P2RX2, PDE1B, PDE4D, PDGFRA, PPP1R1B, PRKCA, PRKCD, PRLH, RAPGEF3, SCAP, SEPN1, SESN2, SLC27A1, SLC6A3, SLC9A1, SOX10, SSH1]	0.0106547
GO:0098771	inorganic ion homeostasis	[Group18]	[ADRA1B, ASPH, ATP13A2, ATP13A4, ATP1A3, ATP1B2, ATP5B, BCL2, CACNA1A, CACNB4, CASR, CCDC47, CCKBR, CCL21, CCL3, CHRNA10, CNNM2, CXCR3, DMPK, EDN2, F2, FIS1, GRINA, HRC, HTT, HYAL2, KEL, LPAR1, OPRM1, PDE4D, PDE6B, PDGFRA, PLCG1, PRKCA, RHAG, RYR3, SCGN, SCNN1B, SFRP4, SLC12A1, SLC12A3, SLC12A8, SLC24A1, SLC34A2, SLC37A4, SLC4A3, SLC9A1, SLC9A3, SLC9A5, TRPC2, TRPC5, TRPV4]	0.0115199
GO:0030049	muscle filament sliding	[Group2]	[MYH7, MYLK2, TNNC1, TNNT2]	0.0116231
GO:0030916	otic vesicle formation	[Group20]	[FGF8, FGFR2, SOX10, TCAP]	0.0116231
GO:0071600	otic vesicle morphogenesis	[Group20]	[FGF8, FGFR2, SOX10, TCAP]	0.0116231
GO:0048048	embryonic eye morphogenesis	[Group54]	[AXIN1, BMP7, FOXL2, HIPK2, MFAP2, PAX6, STRA6, TFAP2A, TH]	0.0116373
GO:0031109	microtubule polymerization or depolymerization	[Group14, Group60]	[APC, AURKB, CKAP2, FES, KATNB1, KIF18A, KIF2C, MAPT, SKA3, SMN2, STMN3, STMN4, SYNE4, TPPP, TRIM54, TUBGCP6]	0.0118195
GO:0060048	cardiac muscle contraction	[Group29]	[ADRA1B, ADRBK1, GPD1L, HCN4, HRC, MYBPC3, MYH7, MYL3, MYL4, PDE4D, SLC9A1, SMAD5, TAZ, TCAP, TNNC1]	0.012187
GO:0050909	sensory perception of taste	[Group32, Group68]	[CA6, GNAT2, LPO, P2RX2, REEP2, RTP3, SCNN1B]	0.0122654
GO:0007188	adenylate cyclase-modulating G-protein coupled receptor signaling pathway	[Group11]	[ADCY1, ADRA1B, CHRM1, CHRM4, CHRM5, FSHR, GABBR1, GHRHR, GNAS, GNAT2, GPR161, HTR1A, HTR1B, HTR4, LPAR1, OPRM1, SFTPA1, TSHR]	0.0122936
GO:0050908	detection of light stimulus involved in visual perception	[Group32]	[BEST1, CACNB4, CNGB1, GNAT2, RGS9BP]	0.0123893
GO:0050962	detection of light stimulus involved in sensory perception	[Group32]	[BEST1, CACNB4, CNGB1, GNAT2, RGS9BP]	0.0123893
GO:0097152	mesenchymal cell apoptotic process	[Group20]	[BMP7, GDF5, HNF1B, SHH, SOX10]	0.0123893
GO:2001053	regulation of mesenchymal cell apoptotic process	[Group20]	[BMP7, GDF5, HNF1B, SHH, SOX10]	0.0123893
GO:0009190	cyclic nucleotide biosynthetic process	[Group11]	[ADCY1, AQP1, AVP, CHRM1, CHRM4, CHRM5, FSHR, GHRHR, GNAS, GPR161, GUCA2A, HTR1B, HTR4, NPPC, NPR2, OPRM1, PALM, PRKCA, TSHR]	0.0133067
GO:0052652	cyclic purine nucleotide metabolic process	[Group11]	[ADCY1, AQP1, AVP, CHRM1, CHRM4, CHRM5, FSHR, GHRHR, GNAS, GPR161, GUCA2A, HTR1B, HTR4, NPPC, NPR2, OPRM1, PALM, PRKCA, TSHR]	0.0133067
GO:0014904	myotube cell development	[Group2]	[ACTN3, BCL2, CACNA1S, IGF1, KEL, MYOD1, MYOG, P2RX2, SEPN1, STAC3]	0.0133447
GO:0048812	neuron projection morphogenesis	[Group54]	[ADCY1, AFG3L2, APC, ATN1, BCL2, BMP7, CACNA1A, CPNE5, CPNE6, CRABP2, DLX5, DPYSL4, EFNB1, ETV4, FGFR2, FN1, GAP43, GORASP1, KEL, LINGO2, MAP2K2, MAPK8IP3, MAPT, MARK2, MYH10, NFATC4, NGFR, NRG1, NTRK1, PAX6, PLXNA3, PLXNA4, PLXNB3, PQBP1, PTPRZ1, RAB3A, ROBO2, SEMA4B, SEMA5B, SEMA6B, SHH, SMN2, SSH1, SYNGAP1, SYT1, SYT17, SYT3, SZT2]	0.0141787
GO:0007017	microtubule-based process	[Group57, Group60]	[AP3B2, APC, ASPM, ATXN7, AURKB, AXIN1, CAMSAP2, CAPN6, CCDC114, CCNF, CELSR2, CENPE, CEP76, CHD3, CKAP2, CUL7, DCTN1, DNAH11, ESPL1, FES, HTT, HYDIN, IFT20, KATNB1, KIF12, KIF18A, KIF20A, KIF23, KIF2C, KIF3B, KIF4A, KIFC1, KLC2, MAP1A, MAP3K11, MAP4, MAPT, MYBL2, NCOR1, PARD3, PAX6, PHLDB1, PLK1, PPP2R1A, PRC1, RCC1, RSPH9, SKA3, SMN2, SPAG5, SPIRE2, STIL, STMN3, STMN4, SYNE4, TEX14, TPPP, TPR, …	0.0144319
GO:0007409	axonogenesis	[Group54]	[ADCY1, AFG3L2, APC, BCL2, BMP7, CACNA1A, CRABP2, DLX5, EFNB1, ETV4, FGFR2, FN1, GAP43, KEL, LINGO2, MAP2K2, MAPK8IP3, MAPT, MARK2, MYH10, NGFR, NRG1, NTRK1, PAX6, PLXNA3, PLXNA4, PLXNB3, PTPRZ1, RAB3A, ROBO2, SEMA4B, SEMA5B, SEMA6B, SHH, SMN2, SSH1, SYNGAP1, SZT2]	0.0144572
GO:0072507	divalent inorganic cation homeostasis	[Group18]	[ADRA1B, ASPH, ATP13A2, ATP13A4, BCL2, CACNB4, CASR, CCDC47, CCKBR, CCL21, CCL3, CHRNA10, CNNM2, CXCR3, DMPK, EDN2, F2, FIS1, GRINA, HRC, KEL, LPAR1, OPRM1, PDE4D, PDE6B, PDGFRA, PLCG1, PRKCA, RYR3, SCGN, SLC24A1, SLC37A4, TRPC2, TRPC5, TRPV4]	0.0145018
GO:0031279	regulation of cyclase activity	[Group11, Group63]	[CHRM1, CHRM4, CHRM5, FSHR, GPR161, GUCA2A, HTR4, OPRM1, PALM, PRKCA, TSHR]	0.0145907
GO:0035272	exocrine system development	[Group13, Group20, Group50]	[BMP7, CELA1, EGFR, FGF8, FGFR2, IGF1, INSR, LAMA1, PAX6, SHH, SOX10]	0.0145907
GO:0072006	nephron development	[Group20]	[ADIPOQ, AQP1, BCL2, BMP7, COL4A3, COL4A4, EGR1, FGF1, FGF8, HNF1B, HOXB7, LIF, PDGFRA, PGF, SHH, SIX1, SOX10]	0.0146911
GO:0055080	cation homeostasis	[Group18]	[ADRA1B, ASPH, ATP13A2, ATP13A4, ATP1A3, ATP1B2, ATP5B, BCL2, CACNB4, CASR, CCDC47, CCKBR, CCL21, CCL3, CHRNA10, CNNM2, CXCR3, DMPK, EDN2, F2, FIS1, GRINA, HRC, HTT, HYAL2, KEL, LPAR1, OPRM1, PDE4D, PDE6B, PDGFRA, PLCG1, PRKCA, RHAG, RYR3, SCGN, SCNN1B, SLC12A1, SLC12A3, SLC12A8, SLC24A1, SLC37A4, SLC4A11, SLC4A3, SLC9A1, SLC9A3, SLC9A5, TRPC2, TRPC5, TRPV4]	0.0147495
GO:0000070	mitotic sister chromatid segregation	[Group57]	[APC, BUB1, CDC6, CDCA5, CDCA8, CENPE, ESPL1, KATNB1, KIF18A, KIF2C, KIFC1, NCAPH, PLK1, POGZ, PPP2R1A, SPAG5, TEX14, TPR, UBE2C]	0.0147825
GO:0014855	striated muscle cell proliferation	[Group1]	[FGFR2, MYOG, NRG1, PPARD, SEPN1, SHH, SIX1, SIX5, TP73]	0.0148717
GO:0014888	striated muscle adaptation	[Group2, Group33]	[ACTN3, CACNA1S, GTF2IRD1, MYH7, MYOD1, MYOG, TCAP, TNNC1, TNNT1]	0.0148717
GO:0051480	cytosolic calcium ion homeostasis	[Group18]	[ADRA1B, ASPH, BCL2, CCKBR, CCL21, CCL3, CHRNA10, CXCR3, EDN2, F2, FIS1, HRC, LPAR1, OPRM1, PDE4D, PDE6B, PDGFRA, PLCG1, SCGN, TRPC2, TRPC5, TRPV4]	0.0149644
GO:0006928	movement of cell or subcellular component	[Group59]	[ABHD2, ADAM15, ADIPOQ, AKT2, AP3B2, APC, AQP1, ARHGAP24, ARHGEF16, ASPM, ATN1, ATP5B, BCL2, BMP7, C5, CACNA1E, CACNA1I, CCDC114, CCL21, CCL25, CCL3, CELF3, CELSR2, CENPE, COL1A1, COL3A1, CSF1, CSPG4, CXCR3, CYP19A1, DBH, DCTN1, DLX5, DNAH11, DPYSL4, EDN2, EFHC1, EFNB1, EGFR, ELANE, EMX2, ETV4, FES, FGF1, FGF8, FLT4, FN1, FSCN1, GAP43, GPD1L, HAS1, HDAC7, HOXA5, HTT, HYAL2, HYDIN, IFT20, IGF1, IN…	0.0154039
GO:0010975	regulation of neuron projection development	[Group54]	[BMP7, CACNA1A, CPNE5, CPNE6, CRABP2, FES, FN1, GFAP, GORASP1, KEL, LPAR1, MAP2K2, MAPT, MARK2, NFATC4, NGFR, NRG1, NTRK1, PALM, PLK5, PLXNA3, PLXNA4, PLXNB3, PQBP1, ROBO2, SEMA4B, SEMA5B, SEMA6B, SMN2, SSH1, SYNGAP1, SYT1, SYT17, SYT3]	0.0154531
GO:0048871	multicellular organismal homeostasis	[Group38]	[ACP5, AIPL1, ALOX12B, AQP1, BCL2, CARTPT, CD7, CDHR1, CNGB1, COL2A1, CRTC3, CSF1, DBH, EDN2, FSHR, GATA2, GNAS, HYAL2, IL7, LDB1, MAP1A, NOX4, NR1D1, PRLH, RAC3, RHAG, RHO, SCNN1B, SFN, SLC27A1, SOX10, TPP1, VPS54, VSIG1]	0.0154531
GO:0055082	cellular chemical homeostasis	[Group18]	[ADRA1B, ASPH, ATP13A2, ATP13A4, ATP1A3, ATP1B2, ATP5B, BCL2, CACNA1A, CACNA1E, CACNB4, CARTPT, CASR, CCKBR, CCL21, CCL3, CHRNA10, CXCR3, DMPK, EDN2, F2, FIS1, FSHR, GCK, GPR68, GRINA, HK1, HRC, KEL, LPAR1, NOX4, NR1D1, OPRM1, PDE4D, PDE6B, PDGFRA, PLCG1, PRKCA, RHAG, RYR3, SCGN, SESN2, SLC24A1, SLC34A2, SLC37A4, SLC4A11, SLC4A3, SLC9A1, TRPC2, TRPC5, TRPV4]	0.0155147
GO:0048705	skeletal system morphogenesis	[Group37, Group54]	[ACP5, ACTN3, AXIN1, BMP7, CHAD, COL11A1, COL1A1, COL2A1, DLX5, FGFR2, GNAS, HOXA5, HOXB7, HOXD9, HYAL2, MDFI, MEF2D, MMP14, MMP2, NPPC, OSR2, PDGFRA, SIX1, SOX10, TFAP2A, THBS1, THBS3]	0.0155214
GO:0050801	ion homeostasis	[Group18]	[ADRA1B, ASPH, ATP13A2, ATP13A4, ATP1A3, ATP1B2, ATP5B, BCL2, CACNA1A, CACNA1G, CACNB4, CASR, CCDC47, CCKBR, CCL21, CCL3, CHRNA10, CNNM2, CXCR3, DMPK, EDN2, F2, FIS1, GPD1L, GRINA, HCN4, HRC, HTT, HYAL2, KEL, LPAR1, OPRM1, PDE4D, PDE6B, PDGFRA, PLCG1, PRKCA, RHAG, RYR3, SCGN, SCNN1B, SFRP4, SLC12A1, SLC12A3, SLC12A8, SLC24A1, SLC34A2, SLC37A4, SLC4A11, SLC4A3, SLC9A1, SLC9A3, SLC9A5, TRPC2, TRPC5…	0.0155968
GO:0019932	second-messenger-mediated signaling	[Group6]	[ACTN3, ADCY1, ADGRL1, CCL3, CRTC3, CXCR3, DMPK, EDN2, FIS1, GHRHR, GNAS, HRC, IGF1, KSR2, LAT, NFATC4, NRG1, OPRM1, PDE4A, PLCG1, PRKG1, SLC12A1, SLC9A1, SOX10, TFF2, THBS1]	0.0156031
GO:0045762	positive regulation of adenylate cyclase activity	[Group11, Group63]	[CHRM1, CHRM4, CHRM5, FSHR, GPR161, HTR4, PRKCA, TSHR]	0.0158966
GO:0007632	visual behavior	[Group32]	[ADRA1B, ATP1A3, CACNA1E, DBH, HTT, IFT20, PDE1B, PPP1R1B, SYNGAP1, TANC1]	0.0161471
GO:0008542	visual learning	[Group32]	[ADRA1B, ATP1A3, CACNA1E, DBH, HTT, IFT20, PDE1B, PPP1R1B, SYNGAP1, TANC1]	0.0161471
GO:0055008	cardiac muscle tissue morphogenesis	[Group2]	[COL11A1, FGFR2, MYBPC3, MYH7, MYL3, MYLK2, NRG1, TCAP, TNNC1, TNNT2]	0.0161471
GO:0010817	regulation of hormone levels	[Group23]	[AANAT, AFP, AQP1, CACNA1A, CACNA1E, CACNA1H, CARTPT, CRABP2, CYP11B1, CYP17A1, CYP19A1, DDO, ECE2, FGB, FSHR, GCK, GDF9, GH1, GHRHR, GPR68, HNF1B, HTR1A, HTT, ICA1, IRS1, LEP, LIF, NNAT, NPVF, NR1D1, NR5A1, PCSK1, PDGFRA, SELM, SHH, TBX3, TG, TRPV4]	0.0161496
GO:0045664	regulation of neuron differentiation	[Group54]	[ASPM, BCL2, BEND6, BMP7, CACNA1A, CPNE5, CPNE6, CRABP2, DTX1, FES, FN1, GATA2, GDF6, GFAP, GORASP1, KEL, LPAR1, MAP2K2, MAPT, MARK2, NFATC4, NGFR, NRG1, NTRK1, PALM, PAX6, PLK5, PLXNA3, PLXNA4, PLXNB3, PQBP1, RAC3, ROBO2, SEMA4B, SEMA5B, SEMA6B, SIX1, SMN2, SOX10, SSH1, SYNGAP1, SYT1, SYT17, SYT3]	0.0165149
GO:0031175	neuron projection development	[Group54]	[ADCY1, AFG3L2, APC, ATN1, BCL2, BMP7, CACNA1A, CAMSAP2, CPNE5, CPNE6, CRABP2, DLX5, DPYSL4, EFHD1, EFNB1, ETV4, FES, FGFR2, FN1, FSHR, GAP43, GFAP, GORASP1, KEL, LAMA1, LAMC1, LINGO2, LPAR1, MAP2K2, MAP4, MAPK8IP3, MAPT, MARK2, MYH10, NFATC4, NGFR, NRG1, NTRK1, PALM, PAX6, PLK5, PLXNA3, PLXNA4, PLXNB3, PQBP1, PRKG1, PTPRZ1, RAB3A, RAC3, ROBO2, SEMA4B, SEMA5B, SEMA6B, SHH, SMN2, SSH1, STMN3, STMN…	0.0165942
GO:0048732	gland development	[Group13, Group20, Group34]	[APC, BCL2, BMP7, CACNB4, CDKN1C, CELA1, CSF1, CYP19A1, EAF2, EGFR, ETV4, FGF8, FGFR2, FOXM1, GATA2, GH1, GHRHR, HNF1B, HOXA5, HOXD9, IGF1, INSR, IQGAP3, IRS1, LAMA1, MKI67, NOTCH4, NR5A1, OXTR, PAX6, PDGFRA, RHBDD3, RLTPR, SFTPA1, SHH, SIX1, SLC6A3, SOX10, STRA6, TBX3, TG]	0.0169227
GO:0031581	hemidesmosome assembly	[Group15]	[COL17A1, ITGB4, LAMC1]	0.0169311
GO:0032808	lacrimal gland development	[Group20]	[FGFR2, PAX6, SOX10]	0.0169311
GO:0042538	hyperosmotic salinity response	[Group26]	[IGF1, SLC12A1, TRPV4]	0.0169311
GO:0060425	lung morphogenesis	[Group20, Group50]	[FGF8, FGFR2, HOXA5, IGF1, LAMA1, LIF, MAP2K2, MAPK8IP3, PLOD3, SHH, SOX10, STK40]	0.016975
GO:0055065	metal ion homeostasis	[Group18]	[ADRA1B, ASPH, ATP13A2, ATP13A4, ATP1A3, ATP1B2, BCL2, CACNB4, CASR, CCDC47, CCKBR, CCL21, CCL3, CHRNA10, CNNM2, CXCR3, DMPK, EDN2, F2, FIS1, GRINA, HRC, HTT, HYAL2, KEL, LPAR1, OPRM1, PDE4D, PDE6B, PDGFRA, PLCG1, PRKCA, RHAG, RYR3, SCGN, SCNN1B, SLC12A1, SLC12A3, SLC12A8, SLC24A1, SLC37A4, SLC9A1, TRPC2, TRPC5, TRPV4]	0.0170067
GO:0060284	regulation of cell development	[Group43, Group54]	[ACTN3, ADIPOQ, ASPM, BCL2, BEND6, BMP7, CACNA1A, CNOT3, COL1A1, COL3A1, CPNE5, CPNE6, CRABP2, CSF1, DTX1, F2, FES, FN1, GATA2, GDF6, GFAP, GORASP1, GPR68, HNF1B, IGF1, KEL, LIF, LPAR1, MAP2K2, MAPT, MARK2, MYOD1, MYOG, NFATC4, NGFR, NPPC, NRG1, NTRK1, OPRM1, PALM, PAX6, PHLDB1, PI16, PLK5, PLXNA3, PLXNA4, PLXNB3, POFUT2, PPP2R1A, PQBP1, PTPRZ1, RAC3, ROBO2, SEMA4B, SEMA5B, SEMA6B, SHH, SIX1, SMN…	0.0170379
GO:0035150	regulation of tube size	[Group29, Group41]	[ADRA1B, AVP, AVPR1B, AVPR2, CASR, DBH, ECE2, EDN2, FGB, HTR1A, HTR1B, NPPC, OXTR, P2RY2, PLOD3, PRKG1, SMTNL1, TRPM4]	0.0173029
GO:0050880	regulation of blood vessel size	[Group29, Group41]	[ADRA1B, AVP, AVPR1B, AVPR2, CASR, DBH, ECE2, EDN2, FGB, HTR1A, HTR1B, NPPC, OXTR, P2RY2, PLOD3, PRKG1, SMTNL1, TRPM4]	0.0173029
GO:0007165	signal transduction	[Group61]	[AAK1, ACAP1, ACTN2, ACTN3, ADAM15, ADCY1, ADGRL1, ADIPOQ, ADRA1B, ADRBK1, AFP, AGR2, AIPL1, AKT2, ALOX12B, ALOX15B, AMOTL2, APC, APLN, ARFGEF2, ARHGAP1, ARHGAP22, ARHGAP24, ARHGAP32, ARHGEF16, ARHGEF40, ASB12, ASPH, ASPM, ATP1A3, ATXN7, AVP, AVPR1B, AVPR2, AXIN1, BCL2, BCL2L14, BEND6, BMP7, BUB1, CACNA1A, CACNB4, CACNG4, CANT1, CARD11, CARD9, CARTPT, CASR, CBLB, CCDC47, CCKBR, CCL21, CCL25, CCL3…	0.0173956
GO:0022603	regulation of anatomical structure morphogenesis	[Group43, Group54]	[ADIPOQ, APC, AQP1, BCL2, BMP7, C5, CACNA1A, CCL3, CCR3, CHAD, COL1A1, COL4A3, CPNE5, CPNE6, CRABP2, CSF1, CXCR3, DVL3, ETV4, F2, FES, FGF1, FGF8, FGFR2, FIS1, FLT4, FN1, FZD2, GATA2, GCM1, GORASP1, HDAC7, HIPK2, HNF1B, HOXA5, HOXB7, HTT, IFT20, KEL, LIF, LOC538493, LPAR1, MAP2K2, MAPT, MARK2, MYH10, MYOD1, MYOG, NFATC4, NGFR, NOTCH4, NRG1, NTRK1, OSR2, PALM, PGF, PHLDB1, PLCG1, PLXNA3, PLXNA4, P…	0.0182228
GO:0046068	cGMP metabolic process	[Group11]	[AIPL1, AQP1, FZD2, GUCA2A, NPPC, NPR2, PDE1B, RORA, THBS1]	0.0182289
GO:0050954	sensory perception of mechanical stimulus	[Group42]	[AXIN1, CHRNA10, COL11A1, COL1A1, COL2A1, DNM1, GJB2, MAP1A, MYO1A, P2RX2, RAB3A, SIX1, SOBP, TBL1X, TFAP2A]	0.0182807
GO:0006753	nucleoside phosphate metabolic process	[Group11]	[ACTN3, ADCY1, AIPL1, ALDOC, AQP1, ATP5B, ATP5G1, ATP6V1B2, AVP, CACNB4, CHRM1, CHRM4, CHRM5, COX8B, CXCR3, ENTPD2, ENTPD8, FHIT, FSHR, FZD2, GCK, GHRHR, GNAS, GPD1L, GPR161, GUCA2A, HK1, HTR1B, HTR4, IGF1, IMPDH1, INSR, MYH3, MYH7, NADK, NADSYN1, NCOR1, NDUFA7, NPPC, NPR2, NUDT5, OPRM1, PALM, PDE1B, PDE4D, PDE6B, PFKFB2, PNKP, PPARA, PRKCA, RORA, RRM2, SUCLG1, TAZ, THBS1, TP53I3, TSHR, TYMS, UCK…	0.0182969
GO:0051783	regulation of nuclear division	[Group57]	[APC, BMP7, BUB1, CD28, CDC6, CDCA5, CENPE, CUL7, ESPL1, FGF8, FGFR2, IGF1, INSR, LIF, MOS, PLK1, RCC1, TEX14, TPR, UBE2C]	0.0183782
GO:1900544	positive regulation of purine nucleotide metabolic process	[Group11]	[ACTN3, AVP, CHRM1, CHRM4, CHRM5, CXCR3, FSHR, FZD2, GHRHR, GNAS, GPR161, GUCA2A, HTR4, IGF1, INSR, PRKCA, TSHR]	0.0183891
GO:0019725	cellular homeostasis	[Group18]	[ADRA1B, APC, AQP1, ASPH, ATP13A2, ATP13A4, ATP1A3, ATP1B2, ATP5B, BCL2, CACNA1A, CACNA1E, CACNB4, CARTPT, CASR, CCKBR, CCL21, CCL3, CHRNA10, CXCR3, DMPK, EDN2, F2, FIS1, FSHR, GCK, GPR68, GRINA, HK1, HRC, KEL, LPAR1, NOX4, NR1D1, OPRM1, PDE4D, PDE6B, PDGFRA, PDIA5, PLCG1, PLG, PRKCA, RHAG, RYR3, SCGN, SESN2, SLC12A1, SLC12A3, SLC12A8, SLC24A1, SLC34A2, SLC37A4, SLC4A11, SLC4A3, SLC9A1, TRPC2, TR…	0.0184062
GO:0034765	regulation of ion transmembrane transport	[Group18, Group5]	[ACTN2, AKT2, ASPH, ATP1B2, CACNA1A, CACNA1B, CACNA1E, CACNA1G, CACNA1H, CACNA1I, CACNA1S, CACNB1, CACNB4, CACNG4, CACNG6, FXYD3, FXYD7, GPD1L, HRC, HTT, IGF1, KCNB2, KCNF1, KCNJ16, KEL, OPRM1, PDE4D, SCN5A, SLC9A1, THBS1, ZP3]	0.0184651
GO:0030817	regulation of cAMP biosynthetic process	[Group11]	[AVP, CHRM1, CHRM4, CHRM5, FSHR, GHRHR, GNAS, GPR161, HTR1B, HTR4, OPRM1, PALM, PRKCA, TSHR]	0.0187063
GO:0046660	female sex differentiation	[Group34]	[AFP, BCL2, FANCA, FOXL2, FSHR, GDF9, INSR, NR5A1, PDGFRA, ROBO2, SOHLH1, STRA6, TBX3, ZP3]	0.0187063
GO:0051321	meiotic cell cycle	[Group44, Group45, Group57]	[ASPM, ESPL1, FANCA, INSR, KIF18A, LIF, MEI1, MKI67, MOS, NPPC, OVOL1, PLK1, PPP2R1A, RAD51B, RSPO1, SPIRE2, STAG3, TDRKH, TEX14, TOP2A, TUBGCP6]	0.018818
GO:0072503	cellular divalent inorganic cation homeostasis	[Group18]	[ADRA1B, ASPH, ATP13A2, ATP13A4, BCL2, CACNB4, CASR, CCKBR, CCL21, CCL3, CHRNA10, CXCR3, DMPK, EDN2, F2, FIS1, GRINA, HRC, KEL, LPAR1, OPRM1, PDE4D, PDE6B, PDGFRA, PLCG1, PRKCA, RYR3, SCGN, SLC24A1, SLC37A4, TRPC2, TRPC5, TRPV4]	0.0189197
GO:0007088	regulation of mitotic nuclear division	[Group57]	[APC, BMP7, BUB1, CD28, CDC6, CDCA5, CENPE, CUL7, ESPL1, FGF8, FGFR2, IGF1, INSR, PLK1, RCC1, TEX14, TPR, UBE2C]	0.0189343
GO:0060041	retina development in camera-type eye	[Group54]	[APC, GNAT2, HIPK2, LAMA1, LAMC3, MYH10, NDP, PAX6, PDE6B, PDGFRA, PRPH2, RHO, ROM1, RPGRIP1, SMARCA4, SOX10, TFAP2A, VSX1]	0.0189343
GO:0030858	positive regulation of epithelial cell differentiation	[Group12]	[ADIPOQ, ALOX15B, APC, BCL2, DMBT1, LIF, PAX6, SFN, SFRP4, SOX10]	0.019021
GO:0033692	cellular polysaccharide biosynthetic process	[Group53]	[AKT2, B3GNT4, B3GNT8, GCK, HAS1, HAS3, IGF1, INSR, IRS1, NR1D1]	0.019021
GO:0061640	cytoskeleton-dependent cytokinesis	[Group52]	[ALKBH4, APC, AURKB, CKAP2, CUL7, KIF20A, KIF23, MYH10, PLK1, SPIRE2]	0.019021
GO:0007512	adult heart development	[Group67]	[ADRA1B, MEF2D, MYH10, MYH7, TCAP]	0.0191589
GO:0009713	catechol-containing compound biosynthetic process	[Group22]	[DBH, HDC, PNMT, SLC6A3, TH]	0.0191589
GO:0042423	catecholamine biosynthetic process	[Group22]	[DBH, HDC, PNMT, SLC6A3, TH]	0.0191589
GO:0045725	positive regulation of glycogen biosynthetic process	[Group53]	[AKT2, GCK, IGF1, INSR, IRS1]	0.0191589
GO:0048266	behavioral response to pain	[Group35]	[CACNA1A, CACNA1E, NTRK1, P2RX2, THBS1]	0.0191589
GO:0051350	negative regulation of lyase activity	[Group11]	[MTRR, OPRM1, PALM, PHPT1, PRKCA]	0.0191589
GO:0090185	negative regulation of kidney development	[Group20]	[ADIPOQ, BMP7, HNF1B, SHH, SIX1]	0.0191589
GO:0010907	positive regulation of glucose metabolic process	[Group53]	[ACTN3, ADRA1B, AKT2, GCK, IGF1, INSR, IRS1, PPARA]	0.0197672
GO:0055010	ventricular cardiac muscle tissue morphogenesis	[Group2]	[COL11A1, FGFR2, MYBPC3, MYH7, MYL3, NRG1, TNNC1, TNNT2]	0.0197672
GO:0045981	positive regulation of nucleotide metabolic process	[Group11]	[ACTN3, AVP, CHRM1, CHRM4, CHRM5, CXCR3, FSHR, FZD2, GHRHR, GNAS, GPR161, GUCA2A, HTR4, IGF1, INSR, PRKCA, TSHR]	0.0206046
GO:0051781	positive regulation of cell division	[Group57]	[APC, AURKB, CD28, CDC6, CDCA5, CXCR5, ESPL1, FGF1, FGF8, FGFR2, IGF1, INSR, KIF23, PGF, PLK1, SHH, UBE2C]	0.0206046
GO:0007605	sensory perception of sound	[Group42]	[AXIN1, CHRNA10, COL11A1, COL1A1, COL2A1, DNM1, GJB2, MAP1A, MYO1A, P2RX2, SIX1, SOBP, TBL1X, TFAP2A]	0.0217286
GO:0007271	synaptic transmission, cholinergic	[Group63, Group65]	[CACNA1A, CHRM1, CHRM4, CHRM5, CHRNA10, CHRNB4, CHRND]	0.0217466
GO:0090184	positive regulation of kidney development	[Group20]	[ADIPOQ, EGR1, HOXB7, LIF, SHH, SIX1, SOX10]	0.0217466
GO:0007187	G-protein coupled receptor signaling pathway, coupled to cyclic nucleotide second messenger	[Group11]	[ADCY1, ADRA1B, CHRM1, CHRM4, CHRM5, FSHR, GABBR1, GHRHR, GNAS, GNAT2, GPR161, HTR1A, HTR1B, HTR4, LPAR1, OPRM1, SFTPA1, TSHR]	0.0218364
GO:0060602	branch elongation of an epithelium	[Group20]	[FGF1, FGFR2, HNF1B, SHH, SIX1, SOX10]	0.0220334
GO:0001580	detection of chemical stimulus involved in sensory perception of bitter taste	[Group32]	[CA6, GNAT2, LPO, RTP3]	0.022264
GO:0033275	actin-myosin filament sliding	[Group2]	[MYH7, MYLK2, TNNC1, TNNT2]	0.022264
GO:0048743	positive regulation of skeletal muscle fiber development	[Group2]	[ACTN3, BCL2, MYOD1, MYOG]	0.022264
GO:0050912	detection of chemical stimulus involved in sensory perception of taste	[Group32]	[CA6, GNAT2, LPO, RTP3]	0.022264
GO:0060346	bone trabecula formation	[Group49]	[CHAD, COL1A1, MMP2, THBS3]	0.022264
GO:0060767	epithelial cell proliferation involved in prostate gland development	[Group20]	[APC, EAF2, SHH, SOX10]	0.022264
GO:1903792	negative regulation of anion transport	[Group58]	[AKT2, HTR1B, SFRP4, THBS1]	0.022264
GO:2000194	regulation of female gonad development	[Group34]	[GDF9, INSR, NR5A1, ZP3]	0.022264
GO:0003229	ventricular cardiac muscle tissue development	[Group2]	[COL11A1, FGFR2, MYBPC3, MYH7, MYL3, NRG1, TBX3, TNNC1, TNNT2]	0.0223128
GO:0030850	prostate gland development	[Group20, Group45]	[APC, BMP7, CYP19A1, EAF2, FGFR2, IGF1, SFTPA1, SHH, SOX10]	0.0223128
GO:0048741	skeletal muscle fiber development	[Group2]	[ACTN3, BCL2, CACNA1S, KEL, MYOD1, MYOG, P2RX2, SEPN1, STAC3]	0.0223128
GO:0030802	regulation of cyclic nucleotide biosynthetic process	[Group11]	[AVP, CHRM1, CHRM4, CHRM5, FSHR, GHRHR, GNAS, GPR161, GUCA2A, HTR1B, HTR4, OPRM1, PALM, PRKCA, TSHR]	0.0235299
GO:0070838	divalent metal ion transport	[Group18]	[ASPH, BCL2, BEST1, CACNA1A, CACNA1B, CACNA1E, CACNA1G, CACNA1H, CACNA1I, CACNA1S, CACNB1, CACNB4, CACNG4, CACNG6, CASR, CCL21, CCL3, CNNM2, CXCR3, F2, HRC, HTT, MRS2, OPRM1, ORAI1, PDE4D, PLCG1, RYR3, SLC24A1, SLC9A1, TRPC2, TRPC5, TRPM4, TRPV4, TRPV6, ZP3]	0.0235983
GO:0050767	regulation of neurogenesis	[Group54]	[ASPM, BCL2, BEND6, BMP7, CACNA1A, COL3A1, CPNE5, CPNE6, CRABP2, CSF1, DTX1, F2, FES, FN1, GATA2, GDF6, GFAP, GORASP1, KEL, LIF, LPAR1, MAP2K2, MAPT, MARK2, NFATC4, NGFR, NRG1, NTRK1, OPRM1, PALM, PAX6, PLK5, PLXNA3, PLXNA4, PLXNB3, PQBP1, PTPRZ1, RAC3, ROBO2, SEMA4B, SEMA5B, SEMA6B, SHH, SIX1, SMN2, SOX10, SSH1, SYNGAP1, SYT1, SYT17, SYT3]	0.0236114
GO:0048546	digestive tract morphogenesis	[Group13, Group20]	[AGR2, BCL2, EGFR, FGFR2, HNF1B, PDGFRA, SHH, SOX10, STRA6, TP73]	0.0236264
GO:0060322	head development	[Group48, Group54]	[AQP1, ASPH, ASPM, ATN1, AXIN1, BCAN, BCL2, CACNA1A, CELSR2, COL1A1, COL3A1, DLX5, ECE2, EFHC1, EGFR, EMX2, FGF8, FGFR2, GATA2, GHRHR, HNF1B, HTT, HYDIN, IGF1, IGF2BP1, LDB1, LRP8, MAPK8IP3, MMP2, MYH10, NCOR1, NNAT, NRG1, OSR2, PAX6, PDGFRA, PEX5, PLXNA3, PLXNA4, PRKG1, RAC3, ROBO2, RORA, SHH, SLC6A3, SLC6A4, SPTBN2, SSBP3, STIL, STRA6, SYNGR3, SZT2, TBX3, TP73, WDR62, XRCC1]	0.023645
GO:0007126	meiotic nuclear division	[Group44, Group57]	[ASPM, ESPL1, FANCA, KIF18A, LIF, MEI1, MKI67, MOS, PLK1, PPP2R1A, RAD51B, RSPO1, SPIRE2, STAG3, TDRKH, TEX14, TOP2A, TUBGCP6]	0.0242118
GO:0035637	multicellular organismal signaling	[Group5]	[CACNA1A, CACNA1E, CACNA1I, CACNB4, CACNG4, CARTPT, CHRM5, CHRNB4, HCN4, HRC, KCNE1, SCN5A, SLC9A1, TRPM4]	0.0251278
GO:0072511	divalent inorganic cation transport	[Group18]	[ASPH, BCL2, BEST1, CACNA1A, CACNA1B, CACNA1E, CACNA1G, CACNA1H, CACNA1I, CACNA1S, CACNB1, CACNB4, CACNG4, CACNG6, CASR, CCL21, CCL3, CNNM2, CXCR3, F2, HRC, HTT, MRS2, OPRM1, ORAI1, PDE4D, PLCG1, RYR3, SLC24A1, SLC9A1, TRPC2, TRPC5, TRPM4, TRPV4, TRPV6, ZP3]	0.0251641
GO:0006584	catecholamine metabolic process	[Group22]	[DBH, HDC, HTR1A, PDE1B, PNMT, SLC6A3, SNCB, TH]	0.0255783
GO:0009712	catechol-containing compound metabolic process	[Group22]	[DBH, HDC, HTR1A, PDE1B, PNMT, SLC6A3, SNCB, TH]	0.0255783
GO:0048873	homeostasis of number of cells within a tissue	[Group39]	[BCL2, CD7, CSF1, GATA2, IL7, RAC3, SOX10, VPS54]	0.0255783
GO:0043583	ear development	[Group20, Group54]	[BCL2, CDH23, CHRNA10, COL11A1, COL2A1, DLX5, DVL3, FGF8, FGFR2, FZD2, GATA2, IGF1, OSR2, SHH, SIX1, SOBP, SOX10, STRA6, TCAP, TFAP2A, TSHR]	0.0257485
GO:0006171	cAMP biosynthetic process	[Group11]	[ADCY1, AVP, CHRM1, CHRM4, CHRM5, FSHR, GHRHR, GNAS, GPR161, HTR1B, HTR4, OPRM1, PALM, PRKCA, TSHR]	0.0272482
GO:0043410	positive regulation of MAPK cascade	[Group27]	[ADRA1B, ALOX12B, AXIN1, CARD9, CARTPT, CCL21, CCL25, CCL3, CSPG4, DVL3, EGFR, FGB, FGF1, FGFR2, FLT4, FSHR, GH1, HIPK2, IGF1, INSR, IQGAP3, KSR1, KSR2, LIF, LPAR1, MAP2K2, MAP2K7, MAP3K11, MAP3K12, MAP3K6, MAPK8IP3, MDFI, NGFR, NOX4, NTRK1, OPRM1, PDE6G, PDGFRA, PRKCA, SHC2, TFF2, THBS1, TNFRSF25]	0.0273696
GO:0007189	adenylate cyclase-activating G-protein coupled receptor signaling pathway	[Group11, Group68]	[ADCY1, ADRA1B, CHRM1, CHRM4, CHRM5, FSHR, GHRHR, GNAS, GPR161, HTR4, OPRM1, TSHR]	0.0276632
GO:0048747	muscle fiber development	[Group2]	[ACTN3, AFG3L2, BCL2, CACNA1S, CACNB4, KEL, MYOD1, MYOG, P2RX2, SEPN1, STAC3, TCAP]	0.0276632
GO:0019226	transmission of nerve impulse	[Group5]	[CACNA1A, CACNA1E, CACNA1I, CACNB4, CACNG4, CARTPT, CHRM5, CHRNB4, SCN5A]	0.0277273
GO:0031281	positive regulation of cyclase activity	[Group11, Group63]	[CHRM1, CHRM4, CHRM5, FSHR, GPR161, GUCA2A, HTR4, PRKCA, TSHR]	0.0277273
GO:0003018	vascular process in circulatory system	[Group29, Group41]	[ADRA1B, AVP, AVPR1B, AVPR2, CASR, DBH, ECE2, EDN2, FGB, HTR1A, HTR1B, NPPC, OXTR, P2RY2, PLOD3, PRKG1, PTP4A3, SMTNL1, TRPM4]	0.0279296
GO:1903046	meiotic cell cycle process	[Group44, Group57]	[ASPM, ESPL1, FANCA, KIF18A, LIF, MEI1, MKI67, MOS, OVOL1, PLK1, PPP2R1A, RAD51B, RSPO1, SPIRE2, STAG3, TDRKH, TEX14, TOP2A, TUBGCP6]	0.0279296
GO:0007200	phospholipase C-activating G-protein coupled receptor signaling pathway	[Group11, Group63]	[ACTN2, ADRA1B, CHRM1, CHRM4, CHRM5, F2, FSHR, LPAR1, OPRM1, P2RY2]	0.0281956
GO:0007519	skeletal muscle tissue development	[Group2]	[ACTN3, BCL2, CACNA1S, CHRND, EGR1, ELN, FOXL2, HOXD9, KEL, LEMD2, MEF2D, MSC, MYLK2, MYOD1, MYOG, P2RX2, SEPN1, SHH, SIX1, STAC3, TAZ]	0.02826
GO:0055083	monovalent inorganic anion homeostasis	[Group47]	[CACNA1A, SFRP4, SLC12A1, SLC12A3, SLC12A8, SLC34A2, SLC37A4]	0.028293
GO:0034762	regulation of transmembrane transport	[Group18]	[ACTN2, AKT2, ASPH, ATP1B2, BCL2, CACNA1A, CACNA1B, CACNA1E, CACNA1G, CACNA1H, CACNA1I, CACNA1S, CACNB1, CACNB4, CACNG4, CACNG6, FXYD3, FXYD7, GPD1L, HRC, HTT, IGF1, KCNB2, KCNF1, KCNJ16, KEL, OPRM1, PDE4D, SCN5A, SLC9A1, THBS1, ZP3]	0.0283126
GO:0042445	hormone metabolic process	[Group23]	[AANAT, AFP, CACNA1A, CACNA1H, CRABP2, CYP11B1, CYP17A1, CYP19A1, DDO, ECE2, FSHR, GHRHR, HTT, LEP, NR5A1, PCSK1, PDGFRA, SELM, SHH, TG]	0.0283577
GO:0030801	positive regulation of cyclic nucleotide metabolic process	[Group11, Group68]	[AVP, CHRM1, CHRM4, CHRM5, CXCR3, FSHR, FZD2, GHRHR, GNAS, GPR161, GUCA2A, HTR4, PRKCA, TSHR]	0.0283967
GO:0009950	dorsal/ventral axis specification	[Group7]	[AXIN1, MDFI, PAX6, RGS19, SOST]	0.0296892
GO:0014733	regulation of skeletal muscle adaptation	[Group2, Group33]	[ACTN3, GTF2IRD1, MYH7, TNNC1, TNNT1]	0.0296892
GO:0006873	cellular ion homeostasis	[Group18]	[ADRA1B, ASPH, ATP13A2, ATP13A4, ATP1A3, ATP1B2, ATP5B, BCL2, CACNA1A, CACNB4, CASR, CCKBR, CCL21, CCL3, CHRNA10, CXCR3, DMPK, EDN2, F2, FIS1, GRINA, HRC, KEL, LPAR1, OPRM1, PDE4D, PDE6B, PDGFRA, PLCG1, PRKCA, RHAG, RYR3, SCGN, SLC24A1, SLC34A2, SLC37A4, SLC4A11, SLC4A3, SLC9A1, TRPC2, TRPC5, TRPV4]	0.0296937
GO:0060541	respiratory system development	[Group50]	[AGR2, AXIN1, DISP1, DLX5, EDN2, FGF1, FGF8, FGFR2, HOXA5, HYDIN, IGF1, LAMA1, LIF, MAP2K2, MAPK8IP3, MMP14, MSC, PDGFRA, PLOD3, RAB3A, SEPN1, SHH, SIX1, SOX10, STK40, STRA6]	0.0297142
GO:0061564	axon development	[Group54]	[ADCY1, AFG3L2, APC, BCL2, BMP7, CACNA1A, CRABP2, DLX5, EFNB1, ETV4, FGFR2, FN1, GAP43, KEL, LINGO2, MAP2K2, MAPK8IP3, MAPT, MARK2, MYH10, NGFR, NRG1, NTRK1, PAX6, PLXNA3, PLXNA4, PLXNB3, PTPRZ1, RAB3A, ROBO2, SEMA4B, SEMA5B, SEMA6B, SHH, SMN2, SSH1, SYNGAP1, SZT2]	0.0298482
GO:0009790	embryo development	[Group54]	[ADIPOQ, ASCL2, AXIN1, BMP7, C5, CDH23, CDKN1C, CHRNA10, CNOT3, COL11A1, COL1A1, COL2A1, COL6A1, CRABP2, DISP1, DLX5, DMBT1, DVL3, ECE2, EFNB1, EGFR, EHMT1, FGF8, FGFR2, FN1, FOXL2, FZD2, GATA2, GCM1, GDF5, GINS4, GNAS, GPR161, HIPK2, HNF1B, HOXA5, HOXB7, HOXC6, HOXD9, HTT, IGF1, INSR, INTS1, ITGA7, ITGB4, LAMA1, LDB1, LEO1, LIF, MAPK8IP3, MBD3, MDFI, MFAP2, MMP14, MMP15, MMP2, MYH10, NLRP5, NRG1…	0.0298935
GO:0007140	male meiosis	[Group44]	[FANCA, KIF18A, MEI1, RSPO1, TDRKH, TEX14]	0.029927
GO:0042481	regulation of odontogenesis	[Group20, Group24]	[APC, CSF1, FGF8, NGFR, SHH, TFAP2A]	0.029927
GO:0045649	regulation of macrophage differentiation	[Group30]	[ADIPOQ, CSF1, GATA2, IL34, LIF, PRKCA]	0.029927
GO:0098656	anion transmembrane transport	[Group55]	[AKT2, BEST1, CLCA3, GABRA3, GABRD, GABRP, LAT, SLC12A1, SLC12A3, SLC12A8, SLC13A3, SLC22A6, SLC22A8, SLC34A2, SLC37A4, SLC38A10, SLC38A3, SLC4A11, SLC4A3, SLC6A17, SLC6A19, SLC6A8, SLC6A9, SLCO3A1, THBS1]	0.0299274
GO:0007051	spindle organization	[Group60]	[ASPM, AURKB, CHD3, ESPL1, KIF23, KIF3B, KIFC1, MAP4, MYBL2, NCOR1, PLK1, PPP2R1A, RCC1, SPAG5, STIL, SYNE4, TPR, TUBGCP6, WDR62]	0.0299804
GO:0050890	cognition	[Group32]	[ADCY1, ADRA1B, AFF2, ATP1A3, CACNA1E, CBR3, CHRM1, CRTC1, DBH, FZD9, GNAS, HTT, IFT20, JAKMIP1, NPTX2, PDE1B, PPP1R1B, PTPRZ1, SHC3, SOBP, STRA6, SYNGAP1, TANC1, TH]	0.0300351
GO:0060348	bone development	[Group37]	[ACP5, ACTN3, CHAD, COL1A1, COL2A1, DLX5, DYM, FGF8, FGFR2, GNAS, GPR68, IGF1, MEF2D, MMP14, NPPC, OSR2, SETDB1, SLC38A10, SMAD5, SOX10, TFAP2A, THBS1, THBS3, VPS33B]	0.0300351
GO:0000187	activation of MAPK activity	[Group27]	[AXIN1, CSPG4, INSR, IQGAP3, LPAR1, MAP2K2, MAP2K7, MAP3K11, MAPK8IP3, MDFI, PDE6G, SHC2, THBS1]	0.0300542
GO:0007052	mitotic spindle organization	[Group60]	[AURKB, KIF23, KIF3B, KIFC1, MAP4, MYBL2, PLK1, RCC1, STIL, SYNE4, TPR, TUBGCP6, WDR62]	0.0300542
GO:0007586	digestion	[Group8]	[AQP1, CAPN8, CHRM1, CHRM5, CYM, GCNT3, LDLR, LEP, NR1H3, SOX10, TFF2, TJP2, VSIG1]	0.0300542
GO:0032941	secretion by tissue	[Group17]	[AGR2, ALOX12B, AQP1, CELSR2, CHRM1, GH1, GHRHR, NLRP6, NR1H3, OXTR, P2RY2, SLC6A3, TP73]	0.0300542
GO:0050808	synapse organization	[Group40]	[ADGRL1, AFG3L2, CACNA1A, CACNA1S, CACNB1, CACNB4, CLSTN1, COLQ, DMPK, FGFR2, LINGO2, NFATC4, NRG1, NTRK1, P2RX2, PALM, RAB3A, SIX1, SNCB, SNCG, SPTBN2]	0.0304316
GO:0048667	cell morphogenesis involved in neuron differentiation	[Group54]	[ADCY1, AFG3L2, APC, ATN1, BCL2, BMP7, CACNA1A, CDH23, CRABP2, DLX5, EFNB1, ETV4, FGFR2, FN1, GAP43, GORASP1, KEL, LINGO2, MAP2K2, MAPK8IP3, MAPT, MARK2, MYH10, NFATC4, NGFR, NRG1, NTRK1, PAX6, PLXNA3, PLXNA4, PLXNB3, PQBP1, PTPRZ1, RAB3A, ROBO2, SEMA4B, SEMA5B, SEMA6B, SHH, SMN2, SSH1, SYNGAP1, SZT2]	0.0316326
GO:0051302	regulation of cell division	[Group57]	[APC, ASPM, AURKB, BMP7, BUB1, CD28, CDC6, CDCA5, CENPE, CUL7, CXCR5, EGFR, ESPL1, FGF1, FGF8, FGFR2, IGF1, INSR, KIF23, LIF, MOS, MPL, PAX6, PGF, PLK1, RCC1, SFN, SHH, STIL, TEX14, TPR, UBE2C]	0.0318639
GO:0007417	central nervous system development	[Group48, Group54]	[AQP1, ASPM, ATN1, AXIN1, BCAN, BCL2, CACNA1A, CELSR2, COL2A1, COL3A1, ECE2, EFHC1, EGFR, EMX2, F2, FGF8, FGFR2, GATA2, GCM1, GFAP, GHRHR, HAPLN3, HNF1B, HTT, HYDIN, IGF1, IGF2BP1, LAMC3, LDB1, LEP, LIF, LRP8, MAPK8IP3, MYH10, NCOR1, NGFR, NNAT, NRG1, PAX6, PEX5, PLXNA3, PLXNA4, PRKG1, PTPRZ1, RAC3, ROBO2, RORA, SHC3, SHH, SIX1, SLC6A3, SLC6A4, SOX10, SPTBN2, SSBP3, STIL, SYNGR3, SZT2, TBX3, TFAP…	0.0323286
GO:0009314	response to radiation	[Group32]	[ADRA1B, AIPL1, AQP1, ATP1A3, AURKB, BCL2, BEST1, CACNA1E, CACNB4, CHRM1, CNGB1, COL3A1, CRTC1, DBH, EGFR, EGR1, ELANE, FIGNL1, GNAT2, HTT, HYAL2, IFT20, JUND, MAP2K7, NFATC4, OPN1LW, PAXIP1, PDE1B, PDE6B, POLH, PPP1R1B, RAD51B, RGS9BP, RHO, SLC24A1, SYNGAP1, TANC1, TP73, USP28]	0.0326671
GO:0051306	mitotic sister chromatid separation	[Group57]	[APC, BUB1, CDC6, CENPE, ESPL1, PLK1, PPP2R1A, TEX14, TPR, UBE2C]	0.0328388
GO:0048477	oogenesis	[Group66]	[ASPM, BCL2, GDF9, IGF1, NPPC, PPP2R1A, SOHLH1, YBX2, ZP3]	0.0328596
GO:0051349	positive regulation of lyase activity	[Group11, Group63]	[CHRM1, CHRM4, CHRM5, FSHR, GPR161, GUCA2A, HTR4, PRKCA, TSHR]	0.0328596
GO:0055123	digestive system development	[Group13, Group20]	[AGR2, BCL2, CDKN1C, CELA1, COL3A1, EGFR, FGFR2, GATA2, HNF1B, HOXA5, IGF1, INSR, ITGB4, PDGFRA, SHH, SOX10, STRA6, TP73]	0.0328877
GO:0060349	bone morphogenesis	[Group37]	[ACP5, ACTN3, COL1A1, COL2A1, DLX5, FGFR2, GNAS, MEF2D, MMP14, NPPC, OSR2, SOX10, TFAP2A, THBS1, THBS3]	0.0334565
GO:0000819	sister chromatid segregation	[Group57]	[APC, BUB1, CDC6, CDCA5, CDCA8, CENPE, ESPL1, KATNB1, KIF18A, KIF2C, KIFC1, NCAPH, PLK1, POGZ, PPP2R1A, SPAG5, TEX14, TOP2A, TPR, UBE2C]	0.0334637
GO:0072358	cardiovascular system development	[Group2, Group54]	[ACTN2, ADAM15, ADRA1B, ADRBK1, ALPK3, ANPEP, AQP1, ATP5B, BMP7, C5, CCR3, COL11A1, COL1A1, COL2A1, COL3A1, COL4A3, CUL7, CXCR3, DVL3, ECE2, EGR1, FGF1, FGF8, FGFR2, FLT4, FN1, FOXM1, FZD2, GATA2, HDAC7, HIPK2, HOXA5, IFT20, IGF1, INSR, ITGA7, ITGB3, LAMA1, LEMD2, LIF, MEF2D, MMP2, MYBPC3, MYH10, MYH7, MYL3, MYLK2, NDP, NFATC4, NOTCH4, NOX4, NPRL3, NRG1, NTRK1, PAXIP1, PDGFRA, PGF, PI16, PLCD3, P…	0.0334696
GO:0072359	circulatory system development	[Group2, Group54]	[ACTN2, ADAM15, ADRA1B, ADRBK1, ALPK3, ANPEP, AQP1, ATP5B, BMP7, C5, CCR3, COL11A1, COL1A1, COL2A1, COL3A1, COL4A3, CUL7, CXCR3, DVL3, ECE2, EGR1, FGF1, FGF8, FGFR2, FLT4, FN1, FOXM1, FZD2, GATA2, HDAC7, HIPK2, HOXA5, IFT20, IGF1, INSR, ITGA7, ITGB3, LAMA1, LEMD2, LIF, MEF2D, MMP2, MYBPC3, MYH10, MYH7, MYL3, MYLK2, NDP, NFATC4, NOTCH4, NOX4, NPRL3, NRG1, NTRK1, PAXIP1, PDGFRA, PGF, PI16, PLCD3, P…	0.0334696
GO:0007589	body fluid secretion	[Group17]	[AGR2, ALOX12B, AQP1, CELSR2, CHRM1, GH1, GHRHR, NLRP6, NR1H3, OXTR, P2RY2, SLC6A3, TP73]	0.0338011
GO:0048646	anatomical structure formation involved in morphogenesis	[Group54]	[ACTN2, ANPEP, AQP1, ATP5B, AXIN1, BMP7, C5, CACNA1A, CACNA1S, CCDC114, CCR3, CELSR2, CHAD, CNOT3, COL11A1, COL1A1, COL2A1, COL4A3, COL6A1, CXCR3, DLX5, DVL3, DYRK1B, FGF1, FGF8, FGFR2, FLT4, FN1, FZD2, GATA2, GCM1, GNAS, HDAC7, HIPK2, HNF1B, HOXA5, HTT, HYDIN, IFT20, ITGA7, ITGB3, ITGB4, LDB1, LEMD2, LEO1, LRP8, MAP2K2, MFAP2, MMP14, MMP15, MMP2, MPL, MYBPC3, MYH10, MYOD1, MYOG, MYPN, NFATC4, NO…	0.0338346
GO:0002026	regulation of the force of heart contraction	[Group29]	[ADRA1B, ADRBK1, MYH7, MYL3, MYL4, PRKCA, SLC9A1]	0.0359259
GO:0035137	hindlimb morphogenesis	[Group19]	[FGF8, GDF5, GNAS, HOXD9, OSR2, SHH, TBX3]	0.0359259
GO:0048483	autonomic nervous system development	[Group36]	[NTRK1, PLXNA3, PLXNA4, PRLH, SIX1, SOX10, TFAP2A]	0.0359259
GO:0051445	regulation of meiotic cell cycle	[Group44, Group45]	[ASPM, INSR, LIF, MOS, NPPC, OVOL1, PPP2R1A]	0.0359259
GO:0007548	sex differentiation	[Group25, Group34]	[AFP, ASPM, BCL2, CNTFR, FANCA, FGF8, FOXL2, FSHR, GDF9, HNF1B, INSR, KIF18A, NR5A1, PDGFRA, RNASE10, ROBO2, SHH, SOHLH1, SOX10, STRA6, TBX3, TSPY, ZP3]	0.0359928
GO:0043588	skin development	[Group28]	[ALOX12B, ALOX15B, APC, BCL2, COL1A1, COL3A1, DACT2, EGFR, FGFR2, FOSL2, GNAS, ITGB4, KRT17, LDB1, LTB, NGFR, OVOL1, PAX6, SFN, SHARPIN, SHH, SOX10, TGM1]	0.0359928
GO:0008585	female gonad development	[Group34]	[AFP, BCL2, FANCA, FOXL2, FSHR, GDF9, INSR, NR5A1, PDGFRA, ROBO2, SOHLH1, ZP3]	0.0361013
GO:0046545	development of primary female sexual characteristics	[Group34]	[AFP, BCL2, FANCA, FOXL2, FSHR, GDF9, INSR, NR5A1, PDGFRA, ROBO2, SOHLH1, ZP3]	0.0361013
GO:0051304	chromosome separation	[Group57]	[APC, BUB1, CDC6, CENPE, ESPL1, PLK1, PPP2R1A, RECQL5, TEX14, TOP2A, TPR, UBE2C]	0.0361013
GO:0060993	kidney morphogenesis	[Group20]	[BCL2, BMP7, FGF1, FGF8, GCNT3, HNF1B, HOXB7, LIF, PGF, SHH, SIX1, SOX10]	0.0361013
GO:2000027	regulation of organ morphogenesis	[Group20, Group24, Group54]	[APC, BCL2, BMP7, CHAD, CSF1, DVL3, ETV4, FGF1, FGF8, FGFR2, FZD2, HNF1B, HOXB7, LIF, NGFR, SHH, SIX1, SOX10, TFAP2A]	0.0368204
GO:0009651	response to salt stress	[Group26]	[AQP1, IGF1, SLC12A1, TRPV4]	0.0374759
GO:0014842	regulation of skeletal muscle satellite cell proliferation	[Group1]	[MYOG, PPARD, SIX1, SIX5]	0.0374759
GO:0014883	transition between fast and slow fiber	[Group2, Group33]	[ACTN3, MYH7, TNNC1, TNNT1]	0.0374759
GO:0051602	response to electrical stimulus	[Group46]	[IGF1, MYOG, PALM, RAB3A]	0.0374759
GO:0055064	chloride ion homeostasis	[Group47]	[CACNA1A, SLC12A1, SLC12A3, SLC12A8]	0.0374759
GO:0060272	embryonic skeletal joint morphogenesis	[Group37]	[AXIN1, BMP7, COL2A1, OSR2]	0.0374759
GO:0008306	associative learning	[Group32]	[ADRA1B, ATP1A3, CACNA1E, DBH, HTT, IFT20, NPTX2, PDE1B, PPP1R1B, SYNGAP1, TANC1]	0.037882
GO:0015696	ammonium transport	[Group3]	[AQP1, CACNA1A, CHRM5, HTR1A, HTR1B, HTT, RHAG, SLC6A2, SLC6A3, SLC6A4, SNCG]	0.037882
GO:0048878	chemical homeostasis	[Group18]	[ADIPOQ, ADRA1B, ALOX12B, AQP1, ASPH, ATP13A2, ATP13A4, ATP1A3, ATP1B2, ATP5B, BCL2, CACNA1A, CACNA1E, CACNA1G, CACNB4, CARTPT, CASR, CCDC47, CCKBR, CCL21, CCL3, CHRNA10, CNNM2, CXCR3, DBH, DMPK, EDN2, F2, FIS1, FSHR, GCK, GHRHR, GPD1L, GPR68, GRINA, HCN4, HK1, HRC, HTT, HYAL2, IGF1, INSR, KEL, LDLR, LEP, LPAR1, MBD5, NCOR1, NOX4, NR1D1, NR1H3, OPRM1, PDE4D, PDE6B, PDGFRA, PLCG1, PRKCA, RHAG, ROR…	0.0379807
GO:0009743	response to carbohydrate	[Group0]	[ADIPOQ, CACNA1E, EGR1, GCK, GPR68, HNF1B, NOX4, NR1D1, P2RX2, PRKCA, PRLH, SESN2, SLC2A5, SLC37A4, THBS1]	0.0379997
GO:0010906	regulation of glucose metabolic process	[Group53]	[ACTN3, ADIPOQ, ADRA1B, AKT2, GCK, IGF1, INSR, IRS1, LEP, NCOA2, NR1D1, PPARA, RORA, SESN2, TFF3]	0.0379997
GO:0030808	regulation of nucleotide biosynthetic process	[Group11]	[AVP, CHRM1, CHRM4, CHRM5, FSHR, GHRHR, GNAS, GPR161, GUCA2A, HTR1B, HTR4, OPRM1, PALM, PRKCA, TSHR]	0.0379997
GO:1900371	regulation of purine nucleotide biosynthetic process	[Group11]	[AVP, CHRM1, CHRM4, CHRM5, FSHR, GHRHR, GNAS, GPR161, GUCA2A, HTR1B, HTR4, OPRM1, PALM, PRKCA, TSHR]	0.0379997
GO:0031344	regulation of cell projection organization	[Group54]	[APC, ARHGAP24, BMP7, CACNA1A, CCL21, CPNE5, CPNE6, CRABP2, FES, FN1, FSCN1, GAP43, GFAP, GORASP1, HTT, IFT20, KEL, LPAR1, MAP2K2, MAPT, MARK2, NFATC4, NGFR, NRG1, NTRK1, PALM, PLK5, PLXNA3, PLXNA4, PLXNB3, PQBP1, PRKCD, ROBO2, SEMA4B, SEMA5B, SEMA6B, SMN2, SSH1, SYNGAP1, SYT1, SYT17, SYT3]	0.0386254
GO:0019229	regulation of vasoconstriction	[Group29, Group41]	[ADRA1B, AVPR1B, AVPR2, DBH, EDN2, FGB, OXTR, SMTNL1]	0.0386622
GO:0030104	water homeostasis	[Group9]	[ALOX12B, AQP1, FSHR, GHRHR, HYAL2, IGF1, SCNN1B, SFN]	0.0386622
GO:0048598	embryonic morphogenesis	[Group37, Group54]	[ADIPOQ, AXIN1, BMP7, CDH23, CDKN1C, CHRNA10, COL11A1, COL2A1, COL6A1, CRABP2, DLX5, DVL3, FGF8, FGFR2, FN1, FOXL2, FZD2, GATA2, GCM1, GDF5, GNAS, HIPK2, HNF1B, HOXA5, HOXB7, HOXD9, HTT, ITGA7, ITGB4, LDB1, LEO1, MDFI, MFAP2, MMP14, MMP15, MMP2, OSR2, PAX6, PDGFRA, PHLDB1, POFUT2, SHH, SIX1, SOBP, SOX10, STIL, STRA6, TBX3, TCAP, TFAP2A, TH, TNRC6C, TSHR, ZBTB17]	0.0387325
GO:1901698	response to nitrogen compound	[Group56]	[ABAT, ADIPOQ, ADRA1B, AKT2, AQP1, ASPH, AVPR1B, AVPR2, BCL2, CARD9, CHRNA10, CHRNB4, CHRND, COL1A1, COL3A1, COL6A1, CPEB2, CYP11B1, DBH, EGFR, EGR1, GH1, GHRHR, HCN4, HCRTR1, HTR1B, IGF1, INSR, IRS1, JUND, LEP, MBD5, MMP2, OPRM1, OXTR, P2RX2, PDE1B, PDE4D, PDGFRA, PPP1R1B, PRKCA, PRKCD, PRLH, RAPGEF3, SCAP, SEPN1, SESN2, SLC27A1, SLC6A3, SLC9A1, SOX10, SSH1, TARBP2, THBS1]	0.0387325
GO:0006163	purine nucleotide metabolic process	[Group11]	[ACTN3, ADCY1, AIPL1, ALDOC, AQP1, ATP5B, ATP5G1, ATP6V1B2, AVP, CACNB4, CHRM1, CHRM4, CHRM5, COX8B, CXCR3, FHIT, FSHR, FZD2, GCK, GHRHR, GNAS, GPR161, GUCA2A, HK1, HTR1B, HTR4, IGF1, IMPDH1, INSR, MYH3, MYH7, NCOR1, NDUFA7, NPPC, NPR2, OPRM1, PALM, PDE1B, PDE4D, PDE6B, PFKFB2, PPARA, PRKCA, RORA, TAZ, THBS1, TSHR]	0.0387806
GO:0001706	endoderm formation	[Group10]	[COL11A1, COL6A1, FN1, HNF1B, ITGA7, LEO1, MMP14, MMP15, MMP2, TNRC6C]	0.0388388
GO:0019935	cyclic-nucleotide-mediated signaling	[Group6]	[ADCY1, CRTC3, CXCR3, GHRHR, GNAS, OPRM1, PDE4A, PRKG1, SOX10, THBS1]	0.0388388
GO:0035270	endocrine system development	[Group13]	[CDKN1C, FGF8, GATA2, GHRHR, HNF1B, HOXA5, INSR, NR5A1, PAX6, PDGFRA, SHH, SIX1, SLC6A3, SOX10, STRA6, TG]	0.0388524
GO:0072073	kidney epithelium development	[Group20]	[ADIPOQ, AQP1, BCL2, BMP7, FGF1, FGF8, FGFR2, HNF1B, HOXB7, LIF, PGF, ROBO2, SHH, SIX1, SMAD5, SOX10]	0.0388524
GO:0045746	negative regulation of Notch signaling pathway	[Group31]	[BEND6, BMP7, DLK2, GATA2, MMP14, NOTCH4]	0.0392838
GO:0030900	forebrain development	[Group48]	[AQP1, ASPM, AXIN1, BCAN, COL3A1, EFHC1, EGFR, EMX2, FGF8, GATA2, GHRHR, HTT, IGF2BP1, LRP8, MAPK8IP3, MYH10, NCOR1, NRG1, PAX6, PEX5, PLXNA3, PLXNA4, PRKG1, RAC3, SHH, SLC6A3, SLC6A4, STIL, SZT2, TBX3, TP73, WDR62, XRCC1]	0.0396766
GO:0061351	neural precursor cell proliferation	[Group51]	[ASPM, ATN1, DAGLA, DBN1, EMX2, FGF8, FZD9, GATA2, IFT20, IGF1, IGF2BP1, PAX6, PTPRZ1, RORA, RPGRIP1, SHCBP1, SHH, SOX10]	0.0397388
GO:0007281	germ cell development	[Group25, Group66]	[ASPM, BCL2, FSHR, GDF9, IGF1, LOC508744, MEI1, NPPC, OSBP2, PPP2R1A, PRM2, SIX5, SMAD5, SOHLH1, TARBP2, TNP1, UBE2J1, YBX2, ZP3]	0.0398045
GO:0000278	mitotic cell cycle	[Group57, Group60]	[APC, ASPM, AURKB, BCL2, BMP7, BUB1, CCNA2, CCNE2, CCNF, CD28, CDC6, CDCA5, CDCA8, CDK1, CDKN1C, CENPE, CENPN, CKAP2, CUL7, DMPK, EGFR, ENSA, ESPL1, FGF8, FGFR2, FOXM1, FSD1, HTT, IGF1, INSR, IQGAP3, KATNB1, KIF18A, KIF20A, KIF23, KIF2C, KIF3B, KIFC1, KNTC1, LIG1, MAP2K2, MAP2K7, MAP4, MYBL2, MYH10, NCAPH, OVOL1, PAX6, PIM2, PLK1, PLK5, POGZ, PPP2R1A, PRKCA, RAD51B, RCC1, RECQL5, SKA3, SPAG5, SPC…	0.0398734
GO:0001823	mesonephros development	[Group20]	[BCL2, BMP7, FGF1, FGF8, FGFR2, HNF1B, HOXB7, OSR2, PGF, ROBO2, SHH, SIX1, SMAD5, SOX10]	0.0402337
GO:0050794	regulation of cellular process	[Group61]	[AAK1, ABHD2, ACAP1, ACE, ACP5, ACTN2, ACTN3, ADAM15, ADCY1, ADGRL1, ADIPOQ, ADRA1B, ADRBK1, AFF2, AFP, AGR2, AIPL1, AKT2, ALB, ALOX12B, ALOX15B, AMOTL2, APBB1, APC, APLN, AQP1, ARFGEF2, ARHGAP1, ARHGAP22, ARHGAP24, ARHGAP32, ARHGEF16, ARHGEF40, ARID3B, ASB12, ASCL2, ASF1B, ASPH, ASPM, ATG13, ATN1, ATP1A3, ATP1B2, ATP5B, ATXN7, AURKB, AVP, AVPR1B, AVPR2, AXIN1, BAHD1, BCL2, BCL2L14, BEND6, BMP7, …	0.0403207
GO:0018107	peptidyl-threonine phosphorylation	[Group4]	[ADRBK1, BCL2, BMP7, CDK1, DYRK1B, GH1, HIPK2, MAP3K12, MYLK2, PLK1, PRKCA, PRKCD]	0.0403286
GO:0031110	regulation of microtubule polymerization or depolymerization	[Group14]	[APC, AURKB, CKAP2, FES, KATNB1, MAPT, SKA3, STMN3, STMN4, SYNE4, TRIM54, TUBGCP6]	0.0403286
GO:0000904	cell morphogenesis involved in differentiation	[Group54]	[ADAM15, ADCY1, AFG3L2, APC, ATN1, BCL2, BMP7, CACNA1A, CDH23, COL1A1, CRABP2, CRYGB, CUL7, DACT2, DLX5, EFNB1, ETV4, FGF8, FGFR2, FN1, GAP43, GORASP1, KEL, LAMC1, LAMC3, LIF, LINGO2, MAP2K2, MAPK8IP3, MAPT, MARK2, MFAP2, MPL, MYH10, NFATC4, NGFR, NRG1, NTRK1, PARD3, PAX6, PHLDB1, PLOD3, PLXNA3, PLXNA4, PLXNB3, POFUT2, PQBP1, PTPRZ1, RAB3A, RAC3, RNASE10, ROBO2, SEMA4B, SEMA5B, SEMA6B, SHH, SMN2,…	0.0403614
GO:0030878	thyroid gland development	[Group13, Group20]	[FGF8, HOXA5, SHH, SIX1, TG]	0.0403951
GO:0007197	adenylate cyclase-inhibiting G-protein coupled acetylcholine receptor signaling pathway	[Group11, Group63, Group65]	[CHRM1, CHRM4, CHRM5]	0.0404372
GO:0007207	phospholipase C-activating G-protein coupled acetylcholine receptor signaling pathway	[Group11, Group63, Group65]	[CHRM1, CHRM4, CHRM5]	0.0404372
GO:0021877	forebrain neuron fate commitment	[Group7]	[AXIN1, GATA2, PAX6]	0.0404372
GO:0031646	positive regulation of neurological system process	[Group16]	[CARTPT, CHRNB4, NRG1]	0.0404372
GO:0060601	lateral sprouting from an epithelium	[Group20]	[BMP7, FGFR2, SHH]	0.0404372
GO:0060677	ureteric bud elongation	[Group20]	[FGF1, HNF1B, SIX1]	0.0404372
GO:0060681	branch elongation involved in ureteric bud branching	[Group20]	[FGF1, HNF1B, SIX1]	0.0404372
GO:0060737	prostate gland morphogenetic growth	[Group20]	[FGFR2, SHH, SOX10]	0.0404372
GO:0072191	ureter smooth muscle development	[Group1, Group13, Group20]	[SHH, SIX1, SOX10]	0.0404372
GO:0072193	ureter smooth muscle cell differentiation	[Group1, Group13, Group20]	[SHH, SIX1, SOX10]	0.0404372
GO:0072203	cell proliferation involved in metanephros development	[Group20]	[BMP7, EGR1, SHH]	0.0404372
GO:0051962	positive regulation of nervous system development	[Group43, Group54]	[ADGRL1, ASPM, BCL2, BEND6, BMP7, CLSTN1, CPNE5, CPNE6, CRABP2, CSF1, FES, FN1, GDF6, GFAP, IGF1, LIF, LINGO2, MAP2K2, MAPT, MARK2, NRG1, NTRK1, OPRM1, PALM, PAX6, PLK5, PLXNB3, ROBO2, SHH, SOX10, SYT1, SYT17, SYT3]	0.0417216
GO:0006942	regulation of striated muscle contraction	[Group29]	[ACTN3, ADRA1B, ADRBK1, DMPK, GPD1L, HCN4, HRC, MYH7, MYL3, PDE4D, SLC9A1]	0.0428943
GO:0022600	digestive system process	[Group8]	[AQP1, CHRM1, CHRM5, GCNT3, LDLR, LEP, NR1H3, SOX10, TFF2, TJP2, VSIG1]	0.0428943
GO:0042476	odontogenesis	[Group20, Group24, Group37]	[APC, BMP7, COL1A1, CSF1, FGF8, FGFR2, ITGB4, NGFR, OSR2, PDGFRA, PPARA, SHH, TFAP2A]	0.0432869
GO:0048839	inner ear development	[Group20, Group54]	[CDH23, CHRNA10, COL11A1, COL2A1, DLX5, DVL3, FGF8, FGFR2, FZD2, GATA2, IGF1, SHH, SIX1, SOBP, SOX10, TCAP, TFAP2A, TSHR]	0.0433383
GO:0007166	cell surface receptor signaling pathway	[Group61]	[AAK1, ADAM15, ADGRL1, ADIPOQ, AFP, AGR2, AKT2, AMOTL2, APC, ASPM, ATP1A3, ATXN7, AXIN1, BCL2, BCL2L14, BEND6, BMP7, CACNB4, CACNG4, CBLB, CCL21, CCL25, CCL3, CCR3, CD28, CD79A, CDKN1C, CELA1, CELSR2, CNTFR, COL1A1, COL2A1, COL3A1, COL4A3, CR2, CSF1, CSPG4, CXCR3, CXCR5, DACT2, DBH, DISP1, DLK2, DLX5, DTX1, DVL3, EDN2, EFNB1, EGFR, EGR1, EYA2, F2, FAM83G, FES, FGB, FGF1, FGF8, FGFR2, FLT4, FSHR, …	0.0434794
GO:0001505	regulation of neurotransmitter levels	[Group69]	[ABAT, ADGRL1, CACNA1A, CACNA1B, CELF6, DAGLA, FSHR, GAD1, GFAP, HTT, PDE1B, RAB3A, SLC6A2, SLC6A3, SLC6A4, SNCG, SYN1, SYT1, TH]	0.0434997
GO:0006813	potassium ion transport	[Group18]	[ACTN2, AQP1, ATP1A3, ATP1B2, GCK, HCN4, IGF1, KCNB2, KCNE1, KCNF1, KCNIP2, KCNJ16, KCNN3, KCNT1, KEL, SLC12A1, SLC12A3, SLC12A8, SLC24A1]	0.0434997
GO:0051301	cell division	[Group57]	[ALKBH4, APC, ASPM, AURKB, BMP7, BUB1, CCNA2, CCNE2, CCNF, CD28, CDC6, CDCA3, CDCA5, CDK1, CENPE, CINP, CKAP2, CUL7, CXCR5, EGFR, ENSA, ESPL1, FGF1, FGF8, FGFR2, FSD1, IGF1, INSR, KATNB1, KIF20A, KIF23, LIF, MAP4, MOS, MPL, MYH10, NCAPH, PAX6, PGF, PLK1, PRC1, RCC1, SFN, SHH, SKA3, SPC24, SPIRE2, STIL, TEX14, TOP2A, TPR, UBE2C, UBE2S, ZWILCH]	0.043706
GO:0030225	macrophage differentiation	[Group30]	[ADIPOQ, CSF1, GATA2, IL34, LIF, PRKCA, SPIB]	0.0438313
GO:0035136	forelimb morphogenesis	[Group19]	[CRABP2, GDF5, HOXD9, OSR2, SHH, TBX3, TFAP2A]	0.0438313
GO:0000271	polysaccharide biosynthetic process	[Group53]	[AKT2, B3GNT4, B3GNT8, GCK, HAS1, HAS3, IGF1, INSR, IRS1, NR1D1]	0.0444206
GO:2000242	negative regulation of reproductive process	[Group20, Group45]	[APC, BMP7, EAF2, IGF1, LIF, NPPC, NR5A1, OVOL1]	0.0458462
GO:0030804	positive regulation of cyclic nucleotide biosynthetic process	[Group11, Group68]	[AVP, CHRM1, CHRM4, CHRM5, FSHR, GHRHR, GNAS, GPR161, GUCA2A, HTR4, PRKCA, TSHR]	0.0459678
GO:0030816	positive regulation of cAMP metabolic process	[Group11, Group68]	[AVP, CHRM1, CHRM4, CHRM5, CXCR3, FSHR, GHRHR, GNAS, GPR161, HTR4, PRKCA, TSHR]	0.0459678
GO:0007018	microtubule-based movement	[Group60]	[AP3B2, CCDC114, CELSR2, CENPE, DCTN1, DNAH11, HTT, HYDIN, IFT20, KATNB1, KIF12, KIF18A, KIF20A, KIF23, KIF2C, KIF3B, KIF4A, KIFC1, KLC2, MAP4, MAPT, RSPH9]	0.0459716
GO:0009150	purine ribonucleotide metabolic process	[Group11]	[ACTN3, ADCY1, AIPL1, ALDOC, AQP1, ATP5B, ATP5G1, ATP6V1B2, AVP, CACNB4, CHRM1, CHRM4, CHRM5, COX8B, CXCR3, FSHR, FZD2, GCK, GHRHR, GNAS, GPR161, GUCA2A, HK1, HTR1B, HTR4, IGF1, IMPDH1, INSR, MYH3, MYH7, NCOR1, NDUFA7, NPPC, NPR2, OPRM1, PALM, PDE1B, PDE4D, PDE6B, PFKFB2, PPARA, PRKCA, RORA, TAZ, THBS1, TSHR]	0.045979
GO:0009117	nucleotide metabolic process	[Group11]	[ACTN3, ADCY1, AIPL1, ALDOC, AQP1, ATP5B, ATP5G1, ATP6V1B2, AVP, CACNB4, CHRM1, CHRM4, CHRM5, COX8B, CXCR3, FHIT, FSHR, FZD2, GCK, GHRHR, GNAS, GPD1L, GPR161, GUCA2A, HK1, HTR1B, HTR4, IGF1, IMPDH1, INSR, MYH3, MYH7, NADK, NADSYN1, NCOR1, NDUFA7, NPPC, NPR2, OPRM1, PALM, PDE1B, PDE4D, PDE6B, PFKFB2, PNKP, PPARA, PRKCA, RORA, RRM2, TAZ, THBS1, TP53I3, TSHR, TYMS, UCK1]	0.0460183
GO:0048592	eye morphogenesis	[Group54]	[AQP1, AXIN1, BCL2, BMP7, CRYGB, FOXL2, FSCN2, GNAT2, HIPK2, MFAP2, PAX6, ROM1, RPGRIP1, SOX10, STRA6, TFAP2A, TH, VSX1]	0.0477171
GO:0055086	nucleobase-containing small molecule metabolic process	[Group11]	[ACTN3, ADCY1, AIPL1, ALDH6A1, ALDOC, AQP1, ATP5B, ATP5G1, ATP6V1B2, AVP, CACNB4, CHRM1, CHRM4, CHRM5, COX8B, CXCR3, ENTPD2, ENTPD8, FHIT, FSHR, FZD2, GCK, GHRHR, GNAS, GPD1L, GPR161, GUCA2A, HK1, HTR1B, HTR4, IGF1, IMPDH1, INSR, MYH3, MYH7, NADK, NADSYN1, NCOR1, NDUFA7, NPPC, NPR2, NUDT5, OPRM1, PALM, PDE1B, PDE4D, PDE6B, PFKFB2, PNKP, PPARA, PRKCA, RORA, RRM2, SUCLG1, TAZ, THBS1, TP53I3, TSHR, …	0.0482794
GO:0002027	regulation of heart rate	[Group29]	[ADRA1B, CACNA1E, CACNA1G, EDN2, GPD1L, HCN4, HRC, KCNE1, MYBPC3, MYH7, PDE4D]	0.0494685
GO:0030819	positive regulation of cAMP biosynthetic process	[Group11, Group63, Group68]	[AVP, CHRM1, CHRM4, CHRM5, FSHR, GHRHR, GNAS, GPR161, HTR4, PRKCA, TSHR]	0.0494685
GO:0072028	nephron morphogenesis	[Group20]	[BCL2, BMP7, FGF1, FGF8, HNF1B, HOXB7, LIF, PGF, SHH, SIX1, SOX10]	0.0494685
BTB4, ZBTB49, ZC3H12A, ZC3H14, ZC3H15, ZC3H8, ZC3HAV1, ZC3HC1, ZCCHC11, ZCCHC12, ZDHHC13, ZEB1, ZER1, ZFAND2A, ZFAND5, ZFP2, ZFP36, ZFP36L1, ZFP36L2, ZFP69, ZFP91, ZFPM1, ZFX, ZFY, ZFYVE1, ZFYVE19, ZGPAT, ZHX1, ZHX2, ZIC2, ZMIZ2, ZMYM3, ZMYM4, ZMYM5, ZMYND11, ZMYND15, ZMYND8, ZNF12, ZNF131, ZNF132, ZNF148, ZNF154, ZNF165, ZNF174, ZNF177, ZNF180, ZNF181, ZNF184, ZNF189, ZNF197, ZNF205, ZNF207, ZNF…

[truncated: 4 more sheets: lightyellow, mediumpurple, plum, saddlebrown]
